# Supplementary material for: Co-occurrence of Fe and P stress in natural populations of the marine diazotroph Trichodesmium
Source: Copernicus journal article supplement (doi:10.5194/bg-2019-493), 2020-01-16
Supplement: Supplementary file 1 [file SupplementaryInformation.pdf › supplementary/SupplementaryInformation.pdf]

**Supplementary Information for “Co-occurrence of Fe and P stress in natural populations of the marine diazotroph *Trichodesmium*.”**

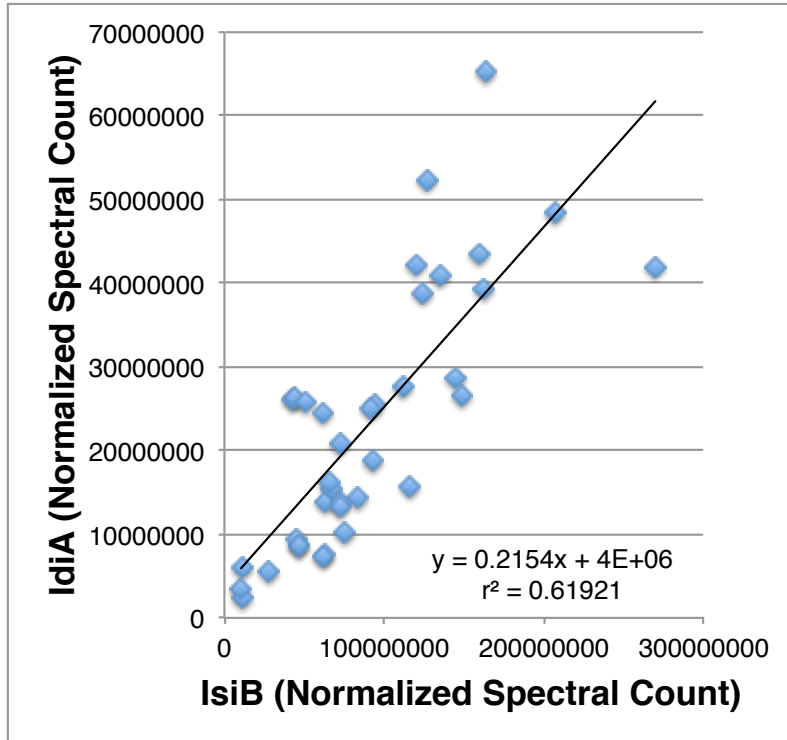

**Figure S1.** Relative abundance of IdiA and IsiB. Both are biomarkers of iron stress in *Trichodesmium*, and behave similarly in this dataset.

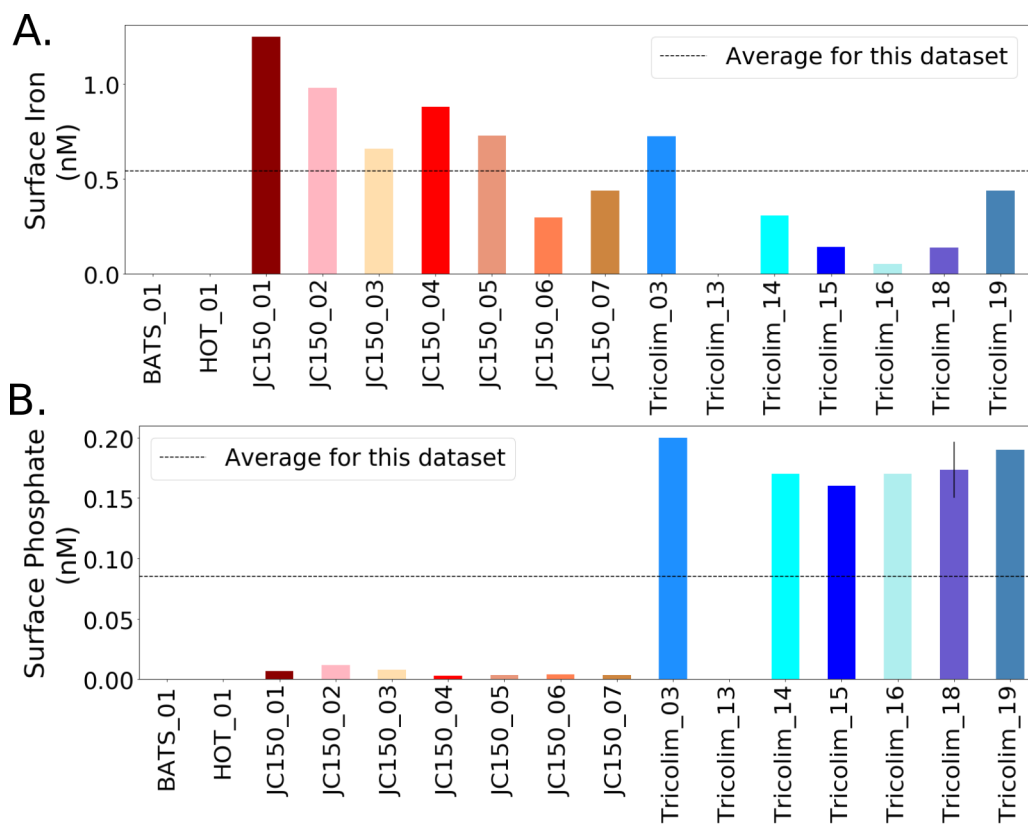

**Figure S2.** (A) Surface iron and (B) surface phosphate distributions at each location, where measured. Note nutrient data is lacking for BATS, HOT, and Tricolim\_13. Dashed lines represent average values across the dataset. The phosphate data for the JC150 cruise has been previously published and was measured at the nm scale.<sup>68</sup> Note that the phosphate concentrations from the Tricolim cruise were not measured at the nm scale and were below the detection limit.

\*Note: Tables S3, S4, S6 are provided as excel files due to their large size

**Table S1.** Important Fe and P stress biomarkers in *Trichodesmium*

| Name | Nutrient sensed | T. erythraeum sp. IMS101 gene name | Gene name in metagenome used in this study (IMG ID 2821474806 ) |
|------|-----------------|------------------------------------|-----------------------------------------------------------------|
| IdiA | Fe              | Tery_3377                          | TCCM_0877.00000020                                              |
| PstS | Phosphate       | Tery_3537                          | TCCM_0018.00000050                                              |
| SphX | Phosphate       | Tery_3534                          | TCCM_0018.00000040                                              |

**Table S2.** Sample provenance information

| Name        | Replication | Cruise   | Cruise station # | Time sampled | Date sampled | Net size (uM) | Filter size | Latitude | Longitude |
|-------------|-------------|----------|------------------|--------------|--------------|---------------|-------------|----------|-----------|
| JC150_03    | triplicate  | JC150    | 3                | pre-dawn     | 7/10/17      | 200           | 0.2uM       | 22       | -50       |
| JC150_04    | singlicate  | JC150    | 4                | pre-dawn     | 7/14/17      | 200           | 0.4uM       | 23.22    | -44.47    |
| JC150_05    | triplicate  | JC150    | 5                | pre-dawn     | 7/19/17      | 200           | 0.4uM       | 23       | -39.6     |
| JC150_06    | singlicate  | JC150    | 6                | pre-dawn     | 7/24/17      | 200           | 0.4uM       | 22.19    | -35.53    |
| JC150_07    | triplicate  | JC150    | 7                | pre-dawn     | 7/29/17      | 200           | 0.4uM       | 22       | -31       |
| JC150_01    | triplicate  | JC150    | 1                | pre-dawn     | 7/3/17       | 200           | 0.2uM       | 22       | -58       |
| JC150_02    | duplicate   | JC150    | 2                | pre-dawn     | 7/4/17       | 200           | 0.2uM       | 21.26    | -54       |
| Tricolim_18 | triplicate  | Tricolim | 18               | pre-dawn     | 3/9/18       | 130           | 0.2uM       | 13.38    | -55.5     |
| Tricolim_15 | triplicate  | Tricolim | 15               | pre-dawn     | 3/5/18       | 130           | 0.2uM       | 5.0239   | -44.1836  |
| Tricolim_19 | triplicate  | Tricolim | 19               | pre-dawn     | 3/11/18      | 130           | 0.2uM       | 16.5     | -57.5     |
| Tricolim_14 | duplicate   | Tricolim | 14               | afternoon    | 3/1/18       | 130           | 0.2uM       | 2.36061  | -39.591   |
| Tricolim_15 | singlicate  | Tricolim | 15               | 9            | 3/3/18       | 130           | 0.2uM       | 5.0239   | -44.1836  |
| Tricolim_03 | duplicate   | Tricolim | 3                | 11:30        | 2/15/18      | 130           | 0.2uM       | 12.13    | -21.59    |
| Tricolim_16 | duplicate   | Tricolim | 16               | 14:45        | 3/4/18       | 130           | 0.2uM       | 7.3      | -48.29    |
| Tricolim_13 | singlicate  | Tricolim | 13               | 15:00        | 2/27/18      | 130           | 0.2uM       | 0.17976  | -30.3984  |
| HOT_01      | duplicate   | HOT 117  | n/a              | 13:30        | 7/27/00      | 130           | 5uM         | 22.45    | -158      |
| BATS_01     | singlicate  | BATS     | n/a              | morning      | 2/4/15       | 200           | 0.2uM       | 31.4     | -64.1     |

**Table S5.** Absolute abundance of the Pst protein and calculation of surface area occupied

Assuming 30% w/w cyanobacteria protein content (Gonzalez Lopez et al., 2010) - lower bound

Assume a cylindrical cell of height 15um, width 11um (Bergmann et al., 2013)

cell volume (um<sup>3</sup>) 1424.8

cell surface area (um<sup>2</sup>) 708.07

Assume average protein contains 0.53 g C / g protein (Rouwenhorst et al)

Assume ATP transporter has cross sectional area of 1.66e-5 um<sup>2</sup> (Hudson and Morel 1992)

| pg C per cell | pg C in protein | pg protein/cell | ug protein/cell |
|---------------|-----------------|-----------------|-----------------|
| 86.65         | 26.00           | 49.05           | 0.00005         |

from cell volume per Strathman 1967

| Station     | Avg [Pst] fmol/ug total protein | St Dev | fmol protein per cell | Pst molecules per cell | S.A. occupied per cell (um <sup>2</sup> ) | % surface area occupied |
|-------------|---------------------------------|--------|-----------------------|------------------------|-------------------------------------------|-------------------------|
| Tricolim_18 | 13.00                           | 1.80   | 0.0006                | 383994.82              | 25.34                                     | 3.58                    |
| Tricolim_15 | 11.22                           | 3.45   | 0.0006                | 331540.40              | 21.88                                     | 3.09                    |
| Tricolim_16 | 89.06                           | 123.06 | 0.0044                | 2630552.93             | 173.62                                    | 24.52                   |
| JC150_3     | 38.73                           | 63.34  | 0.0019                | 1143789.85             | 75.49                                     | 10.66                   |
| JC150_4     | 89.58                           | 14.74  | 0.0044                | 2645858.35             | 174.63                                    | 24.66                   |
| JC150_5     | 74.24                           | 36.42  | 0.0036                | 2192888.10             | 144.73                                    | 20.44                   |
| JC150_6     | 61.64                           | 40.07  | 0.0030                | 1820590.66             | 120.16                                    | 16.97                   |
| JC150_7     | 165.72                          |        | 0.0081                | 4894655.41             | 323.05                                    | 45.62                   |
| JC150_1     | 106.08                          |        | 0.0052                | 3133303.68             | 206.80                                    | 29.21                   |
|             |                                 |        |                       | <b>average</b>         |                                           | 19.86                   |

Assuming 55% w/w cyanobacteria protein content (Gonzalez Lopez et al., 2010) - upper bound

Assume a cylindrical cell of height 15um, width 11um

| pg C per cell | pg C in protein | pg protein/cell | ug protein/cell |
|---------------|-----------------|-----------------|-----------------|
| 86.65         | 47.66           | 89.92           | 0.00009         |

| Station     | Avg [Pst] fmol/ug total protein | St Dev | fmol protein per cell | Pst molecules per cell | S.A. occupied per cell (um <sup>2</sup> ) | % surface area occupied |
|-------------|---------------------------------|--------|-----------------------|------------------------|-------------------------------------------|-------------------------|
| Tricolim_18 | 13.00                           | 1.80   | 0.0012                | 703990.50              | 46.46                                     | 6.56                    |
| Tricolim_15 | 11.22                           | 3.45   | 0.0010                | 607824.06              | 40.12                                     | 5.67                    |
| Tricolim_16 | 89.06                           | 123.06 | 0.0080                | 4822680.37             | 318.30                                    | 44.95                   |
| JC150_3     | 38.73                           | 63.34  | 0.0035                | 2096948.06             | 138.40                                    | 19.55                   |
| JC150_4     | 89.58                           | 14.74  | 0.0081                | 4850740.31             | 320.15                                    | 45.21                   |
| JC150_5     | 74.24                           | 36.42  | 0.0067                | 4020294.85             | 265.34                                    | 37.47                   |
| JC150_6     | 61.64                           | 40.07  | 0.0055                | 3337749.54             | 220.29                                    | 31.11                   |
| JC150_7     | 165.72                          |        | 0.0149                | 8973534.91             | 592.25                                    | 83.64                   |
| JC150_1     | 106.08                          |        | 0.0095                | 5744390.09             | 379.13                                    | 53.54                   |
|             |                                 |        |                       | <b>average</b>         |                                           | 36.41                   |
