# Supplementary material for: Co-occurrence of Fe and P stress in natural populations of the marine diazotroph Trichodesmium
Source: Copernicus journal article supplement (doi:10.5194/bg-2019-493), 2020-01-16
Supplement: Supplementary file 1 [file TableS3.xlsx]

## Sheet: 190116_finaldataset_annotated.c
Table S3. Relative protein abundance data
Values are reported as summed top 3 total precursor intensity, normalized to equalize total sample intensities
Values reported have a 0.1% peptide FDR and 1.9% protein FDR; decoy hits have been filtered out.
Taxonomic and functional annotations are reported as provided by the original sequencing project (JGI genome ID 2156126005)
Protein Accession	Tricolim_14b	Tricolim_15a	Tricolim_16a	Tricolim_16b	Tricolim_15b	Tricolim_15c	Tricolim_15d	Tricolim_18a	Tricolim_18b	Tricolim_18c	JC150_02a	JC150_02b	Tricolim_03a	Tricolim_03b	Tricolim_13a	Tricolim_19a	Tricolim_19b	Tricolim_19c	JC150_03a	JC150_03b	JC150_03c	JC150_04a	JC150_05a	JC150_05b	JC150_05c	JC150_06a	JC150_07a	JC150_07b	JC150_07c	BATS_01b	BATS_01c	JC150_01a	JC150_01b	JC150_01c	HOT_01a	HOT_01b	BATS_01d	Taxonomy	Protein Product Name	KO Annotation	Pfam Annotation
MYG_HORSE	599680000	303190000	323460000	451360000	446380000	343970000	97236000	141010000	175600000	423670000	181760000	199530000	129250000	279940000	615550000	188670000	218600000	249480000	893270000	104330000	255180000	491780000	753820000	143560000	134980000	619060000	398410000	132790000	171670000	42496000	55370000	1009300000	239590000	166540000	0	0	0
TCCM_0939.00000010	136980000	212300000	233120000	133650000	200270000	371680000	58837000	38257000	73680000	89414000	207170000	225460000	83959000	104620000	102660000	97213000	61787000	140010000	66958000	37622000	29137000	193530000	250800000	220380000	119750000	145130000	98035000	159780000	177550000	18100000	27935000	142020000	94526000	95154000	29227000	33470000	67261000	Bacteria;Cyanobacteria;unclassified;Oscillatoriales;unclassified;Trichodesmium;erythraeum;Trichodesmium erythraeum IMS101	chaperonin GroL	KO:K04077	pfam00118
TCCM_0662.00000020	660510000	797170000	801520000	859970000	580930000	1126800000	174050000	186550000	300400000	383790000	562220000	509790000	414520000	425960000	419260000	263380000	333350000	585140000	235570000	122860000	155780000	356660000	498310000	536860000	241670000	321140000	197290000	190000000	438170000	112450000	176770000	401750000	450900000	226110000	34406000	198880000	389800000	Bacteria;Cyanobacteria;unclassified;Oscillatoriales;unclassified;Trichodesmium;erythraeum;Trichodesmium erythraeum IMS101	Phycobilisome protein.	KO:K05376	pfam00502
TCCM_0662.00000030	550100000	337180000	382640000	348850000	721000000	1153700000	239100000	164590000	351620000	314220000	481680000	646440000	337660000	429990000	284640000	330340000	233420000	587070000	205940000	151370000	171680000	307570000	388990000	525090000	251410000	254380000	181250000	289590000	490010000	68603000	91579000	237390000	214700000	301450000	79182000	254730000	148020000	Bacteria;Cyanobacteria;unclassified;Oscillatoriales;unclassified;Trichodesmium;erythraeum;Trichodesmium erythraeum IMS101	Phycobilisome protein.	KO:K05377	pfam00502
TCCM_0011.00000280	136130000	206800000	235150000	263190000	244940000	393140000	76210000	60320000	120000000	139580000	288820000	153370000	91820000	115700000	121960000	127580000	91137000	224930000	77426000	38946000	49776000	164850000	206810000	147660000	166850000	149280000	105540000	136880000	197300000	35695000	30701000	125530000	78430000	77023000	36308000	54912000	89592000	Bacteria;Cyanobacteria;unclassified;Oscillatoriales;unclassified;Trichodesmium;erythraeum;Trichodesmium erythraeum IMS101	F0F1-type ATP synthase, beta subunit	KO:K02112	pfam00006
TCCM_0237.00000020	91659000	116910000	126640000	132430000	196470000	304360000	51085000	27524000	74888000	66332000	106700000	117190000	73078000	92431000	74039000	73190000	43062000	135380000	46737000	25858000	20674000	93660000	159890000	115430000	75018000	89688000	68987000	82687000	86717000	21837000	21438000	80021000	50231000	50843000	21627000	70509000	51545000	Bacteria;Cyanobacteria;unclassified;Oscillatoriales;unclassified;Trichodesmium;erythraeum;Trichodesmium erythraeum IMS101	translation elongation factor TU	KO:K02358	pfam00009
TCCM_0495.00000020	102830000	139940000	172370000	168530000	244480000	369020000	79233000	41506000	101920000	78828000	68861000	80276000	81314000	122300000	56704000	83518000	47075000	121380000	48703000	37676000	20469000	78999000	173140000	78058000	60327000	100520000	75641000	40366000	73532000	26716000	33365000	65348000	31482000	50724000	24317000	54220000	25211000	Bacteria;Cyanobacteria;unclassified;Oscillatoriales;unclassified;Trichodesmium;erythraeum;Trichodesmium erythraeum IMS101	Ribulose 1,5-bisphosphate carboxylase, large subunit	KO:K01601	pfam00016
TCCM_0797.00000220	217390000	178920000	101160000	132930000	272420000	500980000	87619000	73907000	147110000	184950000	312810000	258420000	143660000	209340000	54500000	197490000	120180000	305150000	105550000	71969000	76130000	105700000	163800000	307660000	195650000	118750000	67774000	203010000	205320000	25537000	34333000	105410000	128790000	140110000	9645400	34345000	67597000	Bacteria;Cyanobacteria;unclassified;Oscillatoriales;unclassified;Trichodesmium;erythraeum;Trichodesmium erythraeum IMS101	allophycocyanin, beta subunit	KO:K02093	pfam00502
TCCM_0240.00000030	86403000	106570000	112840000	175340000	277000000	475450000	87004000	38450000	81006000	100850000	293420000	223170000	109880000	139480000	96478000	77939000	56241000	172770000	59961000	51193000	56580000	133900000	180990000	150010000	181860000	114230000	81272000	121010000	166310000	28370000	38661000	116510000	128100000	146030000	18629000	43871000	64237000	Bacteria;Cyanobacteria;unclassified;Oscillatoriales;unclassified;Trichodesmium;erythraeum;Trichodesmium erythraeum IMS101	proton translocating ATP synthase, F1 alpha subunit	KO:K02111	pfam00006
TCCM_0097.00000010	94345000	113010000	162260000	171200000	148990000	234910000	43169000	44134000	94139000	89713000	100880000	112640000	67815000	66794000	61513000	87552000	73136000	158520000	59562000	15795000	17907000	85662000	147320000	146500000	61343000	84192000	72513000	54256000	53097000	16297000	45447000	106400000	74737000	47237000	13668000	48096000	100890000	Bacteria;Cyanobacteria;unclassified;Oscillatoriales;unclassified;Trichodesmium;erythraeum;Trichodesmium erythraeum IMS101	glutamine synthetase, type I	KO:K01915	pfam00120
TCCM_0797.00000210	355240000	317980000	348980000	297480000	371000000	502120000	88903000	77194000	148480000	154430000	207470000	211460000	140960000	198940000	194560000	168370000	122200000	337260000	188230000	56732000	53280000	202080000	399840000	300170000	127100000	213040000	186270000	163060000	155900000	60844000	60708000	247850000	123780000	65142000	41149000	150140000	154250000	Bacteria;Cyanobacteria;unclassified;Oscillatoriales;unclassified;Trichodesmium;erythraeum;Trichodesmium erythraeum IMS101	Phycobilisome protein.	KO:K02092	pfam00502
TCCM_0640.00000010	63276000	92744000	127280000	163210000	143950000	269600000	45800000	26989000	71876000	72964000	162630000	160000000	41947000	44414000	50345000	83177000	74861000	149210000	67593000	46695000	46754000	94580000	135140000	206430000	112400000	90875000	61369000	123560000	120180000	11681000	11857000	115570000	72787000	66353000	10415000	63550000	62225000	Bacteria;Cyanobacteria;unclassified;Oscillatoriales;unclassified;Trichodesmium;erythraeum;Trichodesmium erythraeum IMS101	flavodoxin, long chain	KO:K03839	pfam00258
TCCM_0139.00000020	65365000	62819000	81513000	92125000	97403000	168130000	24743000	18688000	30635000	33660000	67132000	72782000	42389000	48552000	49756000	34683000	30410000	60580000	82837000	12806000	17254000	74053000	113630000	99193000	44196000	71257000	48590000	47800000	57512000	14628000	12722000	59322000	55142000	47371000	30742000	57424000	18405000	Bacteria;Cyanobacteria;unclassified;Oscillatoriales;unclassified;Trichodesmium;erythraeum;Trichodesmium erythraeum IMS101	Carbohydrate-selective porin, OprB family./S-layer homology domain.		pfam04966
TCCM_0184.00000120	124920000	41756000	52285000	67651000	165260000	166050000	64721000	36125000	76465000	81314000	84118000	144530000	166990000	138200000	153380000	99345000	65024000	74261000	46733000	34922000	16442000	76873000	151710000	147030000	97366000	91328000	58417000	164940000	82675000	22367000	18014000	68921000	39699000	94598000	14386000	33298000	83867000	Bacteria;Cyanobacteria;unclassified;Oscillatoriales;unclassified;Trichodesmium;erythraeum;Trichodesmium erythraeum IMS101	Peroxiredoxin		pfam08534
TCCM_0544.00000210	312300000	187230000	226480000	219150000	239300000	454130000	118800000	48395000	178100000	129220000	226770000	198410000	231760000	258600000	118660000	210130000	160380000	307010000	132990000	75560000	109310000	209340000	211590000	226510000	84414000	154040000	95802000	200500000	165850000	30759000	38888000	203050000	148250000	73655000	44204000	157130000	62557000	Bacteria;Cyanobacteria;unclassified;Oscillatoriales;unclassified;Trichodesmium;erythraeum;Trichodesmium erythraeum IMS101	phycocyanin, beta subunit	KO:K02285	pfam00502
TCCM_0544.00000220	254510000	267260000	235300000	210090000	426230000	641240000	97466000	67636000	172190000	140500000	375000000	322370000	175970000	248270000	113950000	173780000	125150000	294350000	73879000	78936000	82297000	201390000	189220000	248900000	180360000	113560000	89209000	196500000	220260000	37484000	51182000	126560000	205140000	158880000	21586000	84542000	197470000	Bacteria;Cyanobacteria;unclassified;Oscillatoriales;unclassified;Trichodesmium;erythraeum;Trichodesmium erythraeum IMS101	phycocyanin, alpha subunit	KO:K02284	pfam00502
TCCM_0139.00000040	57477000	45292000	102680000	100300000	120190000	182900000	28187000	18854000	36674000	36691000	67732000	74411000	34544000	47419000	45475000	38385000	31335000	70563000	45752000	11009000	15387000	39302000	62673000	102410000	55076000	35528000	28184000	41124000	68346000	6216900	7508500	38490000	63004000	54574000	17714000	44464000	13103000	Bacteria;Cyanobacteria;unclassified;Oscillatoriales;unclassified;Trichodesmium;erythraeum;Trichodesmium erythraeum IMS101	Carbohydrate-selective porin, OprB family./S-layer homology domain.		pfam04966
TCCM_0562.00000010	86611000	65272000	114870000	101820000	119690000	216600000	28150000	16989000	40485000	40773000	74733000	111670000	40177000	53297000	39603000	44026000	34858000	98815000	57987000	11491000	15363000	36698000	59597000	76296000	56297000	47887000	28662000	40390000	64967000	10682000	9019500	41038000	76432000	42267000	23583000	60915000	14607000	Bacteria;Cyanobacteria;unclassified;Oscillatoriales;unclassified;Trichodesmium;erythraeum;Trichodesmium erythraeum IMS101	Carbohydrate-selective porin, OprB family./S-layer homology domain.		pfam04966
TCCM_0822.00000010	241680000	235900000	157620000	173360000	601550000	692280000	155230000	47254000	112500000	211360000	154240000	376730000	217130000	266710000	157900000	103790000	149770000	215940000	52946000	58459000	37015000	63938000	96574000	273910000	121690000	64179000	33835000	148620000	100900000	51979000	23577000	46007000	72381000	136730000	41424000	142630000	57094000	Bacteria;Cyanobacteria;unclassified;Oscillatoriales;unclassified;Trichodesmium;erythraeum;Trichodesmium erythraeum IMS101	Phycobilisome protein.	KO:K05377	pfam00502
TCCM_0700.00000010	58093000	59253000	88838000	27702000	41337000	76235000	18415000	12479000	29559000	30023000	37947000	26426000	34333000	42753000	23788000	20927000	18478000	38749000	36629000	9176600	6608500	76896000	75366000	34777000	18491000	50544000	45193000	22661000	22453000	8665400	12922000	59119000	20622000	25359000	11823000	18742000	7803700	Bacteria;Cyanobacteria;unclassified;Oscillatoriales;unclassified;Trichodesmium;erythraeum;Trichodesmium erythraeum IMS101	S-adenosylmethionine synthetase	KO:K00789	pfam02773
TCCM_1000.00000030	55577000	31603000	27338000	40462000	136190000	210720000	32883000	18381000	35644000	33041000	138860000	80812000	46264000	45144000	31791000	50481000	25084000	91278000	17253000	22309000	20478000	57774000	65421000	118190000	57346000	39832000	28066000	72830000	78703000	3728800	4098900	31550000	44803000	37523000	6213600	8669900	28309000	Bacteria;Cyanobacteria;unclassified;Oscillatoriales;unclassified;Trichodesmium;erythraeum;Trichodesmium erythraeum IMS101	Chaperonin GroEL (HSP60 family)	KO:K04077	pfam00118
TCCM_0822.00000040	304140000	281310000	363580000	450050000	485270000	661030000	160560000	104470000	244280000	256030000	339450000	252350000	224360000	228990000	190920000	273400000	122150000	351480000	144320000	102410000	100830000	244440000	372730000	255850000	144630000	222380000	173170000	211010000	248720000	60881000	98226000	221210000	190780000	141940000	32838000	178150000	205460000	Bacteria;Cyanobacteria;unclassified;Oscillatoriales;unclassified;Trichodesmium;erythraeum;Trichodesmium erythraeum IMS101	Phycobilisome protein.	KO:K05376	pfam00502
TCCM_0183.00000190	118090000	123100000	237260000	217730000	189230000	327990000	49236000	39658000	81924000	83503000	176640000	142620000	70065000	73250000	120290000	74529000	62355000	150330000	57980000	25702000	35749000	109790000	133580000	144420000	111110000	140380000	68733000	108320000	152410000	31288000	24584000	92793000	65908000	76058000	32310000	61592000	36162000	Bacteria;Cyanobacteria;unclassified;Oscillatoriales;unclassified;Trichodesmium;erythraeum;Trichodesmium erythraeum IMS101	S-adenosylhomocysteine hydrolase	KO:K01251	pfam00670
TCCM_1000.00000040	115310000	187680000	200490000	129460000	123770000	261120000	42891000	26595000	52030000	42804000	114970000	188430000	60249000	68163000	104100000	42013000	33417000	104560000	67182000	12994000	30527000	167400000	192980000	121410000	62211000	114780000	70493000	55876000	105440000	13925000	16250000	132830000	43048000	69362000	4613800	17821000	26908000	Bacteria;Cyanobacteria;unclassified;Oscillatoriales;unclassified;Trichodesmium;erythraeum;Trichodesmium erythraeum IMS101	Chaperonin GroEL (HSP60 family)	KO:K04077	pfam00118
TCCM_0616.00000020	65343000	50925000	80206000	58267000	137680000	181430000	33857000	38003000	78240000	78870000	149200000	120270000	43178000	50716000	98001000	86716000	65301000	139430000	31379000	30196000	37544000	44561000	79371000	139800000	90572000	61280000	35328000	75249000	116960000	515380	5850900	53294000	90383000	63148000	17342000	58611000	39711000	Bacteria;Cyanobacteria;unclassified;Oscillatoriales;unclassified;Trichodesmium;erythraeum;Trichodesmium erythraeum IMS101	superoxide dismutase, Ni	KO:K00518	pfam09055
TCCM_0707.00000730	42565000	182300000	136770000	90681000	7936300	83683000	17268000	6777100	23488000	12023000	174740000	230290000	13748000	2171000	51718000	112030000	90906000	201030000	61360000	26932000	69562000	51644000	156580000	215170000	57396000	47839000	16167000	139890000	59661000	408690	22302000	48211000	92109000	86042000	17261000	22234000	0	Bacteria;Cyanobacteria;unclassified;Nostocales;Nostocaceae;Raphidiopsis;brookii;Raphidiopsis brookii D9
TCCM_0102.00001950	2710800	4361600	12580000	17327000	77775000	116120000	13771000	26471000	107360000	79377000	567910000	392290000	166530000	207640000	0	136070000	124710000	424480000	97460000	59256000	40219000	122960000	273620000	426790000	318640000	132390000	79735000	285720000	291710000	35355000	21354000	143140000	172380000	159770000	0	0	17925000	Bacteria;Cyanobacteria;unclassified;Oscillatoriales;unclassified;Trichodesmium;erythraeum;Trichodesmium erythraeum IMS101
TCCM_0851.00000010	19636000	18656000	22865000	16294000	18544000	33554000	4388300	4029800	9167500	9090200	17878000	13127000	18087000	21977000	10300000	8642400	6791900	14795000	7688600	2552600	2827000	12464000	20221000	15684000	11339000	14042000	10617000	14287000	18198000	3248300	4525000	12687000	7387400	7014900	1973100	4050500	8976200	Bacteria;Cyanobacteria;unclassified;Oscillatoriales;unclassified;Trichodesmium;erythraeum;Trichodesmium erythraeum IMS101	polyribonucleotide nucleotidyltransferase	KO:K00962	pfam03725
TCCM_0062.00000160	28578000	19272000	22758000	20689000	34261000	59803000	10969000	8420400	18497000	15796000	23857000	22823000	15719000	22907000	11619000	15540000	9984600	23737000	10828000	4725700	5243100	14688000	31217000	22045000	16589000	20395000	8849100	13141000	15132000	7651700	4181400	18138000	19020000	14193000	6684600	15586000	22526000	Bacteria;Cyanobacteria;unclassified;Oscillatoriales;unclassified;Trichodesmium;erythraeum;Trichodesmium erythraeum IMS101	transaldolase	KO:K00616	pfam00923
TCCM_0857.00000020	96958000	43681000	37930000	42170000	67382000	110740000	17403000	18099000	20483000	25107000	59109000	93343000	39111000	14794000	28232000	31169000	21112000	82667000	24500000	13055000	14426000	42158000	47516000	53347000	34159000	30000000	26638000	41730000	44125000	8469000	10199000	51157000	46458000	49127000	2682400	9015700	21796000	Bacteria;Cyanobacteria;unclassified;Oscillatoriales;unclassified;Trichodesmium;erythraeum;Trichodesmium erythraeum IMS101	fructose-bisphosphate aldolase, class II, Calvin cycle subtype	KO:K01624	pfam01116
TCCM_0522.00000010	68471000	65287000	25837000	21887000	38045000	59145000	10403000	38821000	69650000	81392000	144240000	148740000	7652900	13742000	6176700	128090000	90425000	171610000	98827000	43651000	50236000	111140000	167460000	160420000	100040000	109570000	45020000	63634000	82760000	314860	34222000	125310000	64368000	72334000	4417300	0	0	Bacteria;Actinobacteria;Actinobacteria;Actinomycetales;Nocardiaceae;Rhodococcus;equi;Rhodococcus equi ATCC 33707	Arylsulfatase A and related enzymes		pfam00884
TCCM_0208.00000030	67207000	76406000	67928000	64393000	59390000	96174000	17694000	10793000	24425000	22349000	50057000	56147000	29176000	39667000	25469000	23505000	20877000	43848000	27328000	10681000	12177000	53930000	81778000	54965000	39375000	44635000	30376000	47885000	44351000	9339300	14990000	40542000	26303000	33112000	9545300	16915000	37159000	Bacteria;Cyanobacteria;unclassified;Oscillatoriales;unclassified;Trichodesmium;erythraeum;Trichodesmium erythraeum IMS101	Glucose-6-phosphate isomerase	KO:K01810	pfam00342
TCCM_0472.00000070	50708000	43128000	29945000	65284000	114830000	178970000	31588000	20732000	43727000	45104000	116240000	120350000	46022000	67052000	46830000	44358000	39681000	102320000	40831000	15098000	18358000	43099000	91239000	106870000	68687000	48541000	31551000	60619000	69485000	7216900	14165000	40417000	43367000	49626000	13431000	28907000	32183000	Bacteria;Cyanobacteria;unclassified;Oscillatoriales;unclassified;Trichodesmium;erythraeum;Trichodesmium erythraeum IMS101	Carbon dioxide concentrating mechanism/carboxysome shell protein	KO:K08696	pfam00936
TCCM_0496.00000260	75877000	113430000	152720000	176010000	200270000	311910000	50780000	36386000	54680000	70150000	132370000	81631000	41774000	48202000	57529000	87119000	93917000	155730000	110220000	37024000	52914000	164810000	273880000	147940000	91499000	147040000	102030000	88118000	148090000	8749300	45344000	131990000	79660000	57182000	13522000	80074000	66485000	Bacteria;Cyanobacteria;unclassified;Oscillatoriales;unclassified;Trichodesmium;erythraeum;Trichodesmium erythraeum IMS101	cyanobactin maturation protease, PatA/PatG family
TCCM_0692.00000100	38259000	44466000	79240000	83444000	82438000	145930000	24322000	12848000	33032000	24684000	67673000	61266000	43709000	81634000	24226000	37976000	31410000	51788000	6819900	11258000	11895000	35268000	52801000	52160000	25238000	27047000	12849000	44796000	45439000	4554300	27181000	30581000	24268000	18725000	1493900	5107700	16382000	Bacteria;Cyanobacteria;unclassified;Oscillatoriales;unclassified;Trichodesmium;erythraeum;Trichodesmium erythraeum IMS101	fructose-1,6-bisphosphatase, class II	KO:K11532	pfam03320
TCCM_0872.00002580	97994000	20954000	44048000	50514000	183380000	283690000	30664000	11619000	59788000	66256000	224390000	90419000	92886000	91256000	131490000	103490000	25412000	144550000	32291000	49852000	30410000	83474000	92970000	146070000	68171000	81036000	53866000	127720000	142420000	21980000	13448000	77568000	103840000	89503000	4536700	7006400	38890000	Bacteria;Cyanobacteria;unclassified;Oscillatoriales;unclassified;Trichodesmium;erythraeum;Trichodesmium erythraeum IMS101	Chaperonin GroEL (HSP60 family)	KO:K04077	pfam00118
TCCM_0154.00000330	63993000	61473000	128750000	78113000	78517000	186250000	29161000	24265000	38031000	35578000	10903000	9382300	49177000	77793000	68776000	41535000	24626000	24716000	42199000	7052800	9924100	42693000	98570000	21535000	8759300	53078000	43789000	30511000	34180000	13292000	11969000	51097000	17336000	7868100	17054000	46364000	39910000	Bacteria;Cyanobacteria;unclassified;Oscillatoriales;unclassified;Trichodesmium;erythraeum;Trichodesmium erythraeum IMS101	Ribulose bisphosphate carboxylase small subunit	KO:K01602	pfam00101
TCCM_0197.00000070	72420000	18211000	12760000	28356000	83833000	117380000	22547000	11080000	36629000	33263000	95831000	86957000	33975000	46736000	29243000	32037000	26525000	58580000	15525000	14203000	13095000	37584000	53924000	75069000	48631000	32640000	24146000	56373000	64015000	6340000	9272800	34216000	35177000	38279000	5216300	12042000	25861000	Bacteria;Cyanobacteria;unclassified;Oscillatoriales;unclassified;Trichodesmium;erythraeum;Trichodesmium erythraeum IMS101	Molecular chaperone	KO:K04043	pfam00012
TCCM_0570.00000250	37810000	20809000	35779000	26177000	49546000	84150000	15308000	10254000	23988000	19309000	40115000	40181000	24054000	29388000	13885000	25165000	18209000	33285000	13245000	7027000	8789300	23680000	32631000	40677000	27362000	22019000	15913000	37896000	32806000	3758500	6254100	22590000	16205000	23440000	5722300	13578000	12439000	Bacteria;Cyanobacteria;unclassified;Oscillatoriales;unclassified;Trichodesmium;erythraeum;Trichodesmium erythraeum IMS101	Molecular chaperone	KO:K04043	pfam00012
TCCM_0196.00000230	43255000	42654000	71848000	63620000	80328000	107130000	24716000	18181000	34009000	43912000	68216000	81463000	52925000	50327000	32450000	37939000	30449000	60602000	27722000	19417000	20465000	47056000	69405000	62300000	41136000	42997000	26180000	49699000	70388000	12763000	13079000	37615000	40270000	44319000	4563600	12958000	29887000	Bacteria;Cyanobacteria;unclassified;Oscillatoriales;unclassified;Trichodesmium;erythraeum;Trichodesmium erythraeum IMS101	Transketolase	KO:K00615	pfam00456
TCCM_0274.00003180	4219700	1071000	776260	942680	33346000	47615000	2545000	11219000	34819000	31484000	100320000	82246000	9315200	14222000	203480	27506000	13423000	48912000	29014000	12645000	14677000	54069000	65266000	70138000	71408000	24716000	19938000	59457000	26156000	0	0	57139000	44005000	29926000	0	0	0
TCCM_0664.00000010	86162000	71381000	90099000	79879000	87192000	144740000	29717000	21309000	47392000	56141000	75502000	45942000	45819000	47536000	72504000	38423000	31030000	79646000	28596000	11494000	11413000	49626000	80469000	56026000	36148000	35070000	40258000	38960000	65427000	13754000	8280300	47660000	39367000	32510000	4688900	16578000	24769000	Bacteria;Cyanobacteria;unclassified;Oscillatoriales;unclassified;Trichodesmium;erythraeum;Trichodesmium erythraeum IMS101	3-phosphoglycerate kinase	KO:K00927	pfam00162
TCCM_0037.00000190	18731000	33994000	25866000	19235000	33459000	50155000	8544600	10458000	25037000	25935000	47474000	50036000	13759000	22027000	12434000	30928000	24891000	61315000	55308000	10949000	11125000	62494000	71501000	43392000	27543000	49329000	37031000	32353000	31877000	6815800	18945000	53358000	21452000	21487000	3486000	6144100	9181400			KO:K00435	pfam13385
TCCM_0927.00000010	22345000	17690000	26002000	33719000	44706000	57232000	11489000	8027200	13767000	15790000	25631000	23045000	18409000	22319000	14908000	16791000	11974000	23409000	6044900	4497100	4227400	9609800	16852000	23519000	13894000	9587000	7290500	18963000	23418000	4070000	4407000	8350600	13146000	14566000	5354900	9251200	16780000	Bacteria;Cyanobacteria;unclassified;Oscillatoriales;unclassified;Trichodesmium;erythraeum;Trichodesmium erythraeum IMS101	ATPases with chaperone activity, ATP-binding subunit	KO:K03696	pfam07724
TCCM_0427.00000140	39745000	72654000	49660000	42347000	48677000	70495000	9920400	5736200	13110000	14865000	20810000	16821000	22914000	35918000	23902000	13623000	11891000	25451000	6216400	5566100	2966800	13607000	21431000	16797000	10618000	11007000	8558800	15972000	20621000	8085300	6080600	11042000	6141700	11090000	6046000	23664000	15235000	Bacteria;Cyanobacteria;unclassified;Oscillatoriales;unclassified;Trichodesmium;erythraeum;Trichodesmium erythraeum IMS101	nitrogenase molybdenum-iron protein alpha chain	KO:K02586	pfam00148
TCCM_0550.00000800	16358000	2071700	4760600	8900800	12285000	21954000	4847000	14306000	17095000	23381000	169010000	155490000	6030500	9263900	1413500	35400000	35616000	73426000	59644000	22399000	36410000	94263000	100800000	120840000	60571000	49456000	56390000	64646000	60428000	5653200	20997000	99996000	79952000	67183000	3208700	0	66036
TCCM_0263.00000200	90360000	128390000	103080000	165760000	117600000	184090000	24772000	17510000	49232000	48458000	103650000	160600000	57551000	81202000	96041000	57345000	30253000	108660000	38856000	18157000	28572000	90948000	124970000	120620000	104890000	92642000	53643000	69922000	125690000	24532000	21574000	84889000	59264000	36759000	4071500	5140400	16923000	Bacteria;Cyanobacteria;unclassified;Chroococcales;unclassified;Thermosynechococcus;elongatus;Thermosynechococcus elongatus BP-1	Chaperonin GroEL (HSP60 family)	KO:K04077	pfam00118
TCCM_0584.00000030	71879000	69360000	70791000	65983000	74422000	123830000	21224000	20465000	12450000	39918000	33120000	35898000	37240000	55671000	28971000	44352000	38498000	50040000	26809000	8999900	18308000	42655000	72811000	52494000	49817000	39083000	27331000	64048000	60962000	11347000	10799000	38008000	43868000	42393000	7649500	10928000	46856000	Bacteria;Cyanobacteria;unclassified;Oscillatoriales;unclassified;Trichodesmium;erythraeum;Trichodesmium erythraeum IMS101	Phycobilisome Linker polypeptide./CpcD/allophycocyanin linker domain.	KO:K05380	pfam00427
TCCM_0236.00000020	13881000	1518600	2118700	5450600	43271000	141900000	27920000	9123500	26735000	21557000	80646000	172390000	23984000	31635000	21064000	33439000	29812000	75685000	26854000	29921000	10905000	28144000	47189000	127680000	79143000	27217000	18641000	56437000	65714000	2156400	11761000	35584000	47229000	41732000	140070	816250	29198000	Bacteria;Cyanobacteria;unclassified;Oscillatoriales;unclassified;Trichodesmium;erythraeum;Trichodesmium erythraeum IMS101	plastocyanin	KO:K02638	pfam00127
TCCM_0439.00000030	49028000	41086000	57772000	79262000	72631000	90213000	12760000	11312000	19371000	26520000	64403000	93442000	36288000	40996000	47611000	19080000	15477000	69872000	24053000	14928000	11674000	30298000	80786000	66726000	33922000	35467000	27657000	62812000	104250000	6513000	3945800	37971000	52599000	23148000	4956800	4865100	20738000	Bacteria;Cyanobacteria;unclassified;Oscillatoriales;unclassified;Trichodesmium;erythraeum;Trichodesmium erythraeum IMS101	Peroxiredoxin		pfam00578
TCCM_0155.00000010	20032000	11294000	14803000	26628000	34173000	49851000	8374000	4687100	7926100	9056200	16598000	23260000	12450000	16981000	12477000	11253000	7953000	15968000	6981500	3646700	3118400	14102000	18884000	19650000	12558000	10360000	10353000	18000000	16172000	5303900	2372700	10417000	7040900	4023000	7014600	24200000	4230400	Bacteria;Cyanobacteria;unclassified;Oscillatoriales;unclassified;Trichodesmium;erythraeum;Trichodesmium erythraeum IMS101	Membrane protease subunits, stomatin/prohibitin homologs		pfam01145
TCCM_0164.00000130	32263000	26483000	62979000	77404000	63942000	93133000	16799000	18423000	35489000	39568000	61924000	56442000	35809000	36895000	31911000	31484000	26970000	66052000	16401000	10313000	11544000	26191000	37030000	51362000	36852000	28066000	17923000	54730000	62999000	5168600	8540700	26155000	28124000	26630000	8310200	20155000	16499000	Bacteria;Cyanobacteria;unclassified;Oscillatoriales;unclassified;Trichodesmium;erythraeum;Trichodesmium erythraeum IMS101	Uridine kinase	KO:K00855	pfam00485
TCCM_0780.00000030	62325000	69756000	91318000	70742000	78443000	122970000	22778000	14777000	30375000	33783000	43581000	39572000	41124000	36657000	38567000	38279000	29050000	39988000	38840000	7419100	7317200	46049000	88353000	37031000	25913000	57272000	32694000	30156000	26476000	11837000	13435000	44396000	17545000	22794000	13377000	26029000	16061000	Bacteria;Cyanobacteria;unclassified;Oscillatoriales;unclassified;Trichodesmium;erythraeum;Trichodesmium erythraeum IMS101
TCCM_0152.00001960	0	0	9063200	16845000	7850200	16389000	0	0	8619300	13694000	71763000	94951000	1513300	0	3259900	79146000	50130000	66634000	36067000	20747000	14658000	65050000	128210000	105840000	85458000	96404000	10241000	44951000	14238000	0	0	108120000	82187000	33477000	0	0	0
TCCM_0779.00001180	226670000	20136000	22285000	13662000	57971000	187930000	43277000	95449000	136420000	213280000	14863000	18190000	15923000	16046000	31233000	125880000	58733000	160720000	14691000	263810	61514	2645400	3092000	35087000	6828700	1190000	384540	1663400	0	1985600	0	6359900	9315400	11129000	4573900	9509000	0	Eukaryota;Arthropoda;Insecta;Diptera;Drosophilidae;Drosophila;melanogaster;Drosophila melanogaster y; cn bw sp	Histones H3 and H4	KO:K11254	pfam00125
TCCM_1000.00000010	51804000	5818400	528040	7304300	86335000	204010000	24979000	26388000	84659000	39736000	244020000	161970000	45874000	39378000	46224000	48074000	51296000	105610000	53803000	30182000	35890000	94500000	128220000	114430000	79345000	74881000	47153000	90591000	118040000	9730700	7017500	78172000	87332000	73313000	10342000	23403000	77251000	Bacteria;Cyanobacteria;unclassified;Oscillatoriales;unclassified;Trichodesmium;erythraeum;Trichodesmium erythraeum IMS101	Co-chaperonin GroES (HSP10)		pfam00166
TCCM_0584.00000020	18020000	30385000	37275000	24141000	33095000	122150000	10162000	9959300	11376000	14484000	28929000	54434000	26750000	24826000	10060000	11941000	14020000	28802000	13649000	2926500	5566000	26939000	40040000	42227000	22994000	28199000	19127000	31617000	21622000	14602000	12230000	31008000	11666000	23459000	8026600	17359000	4933600	Bacteria;Cyanobacteria;unclassified;Oscillatoriales;unclassified;Trichodesmium;erythraeum;Trichodesmium erythraeum IMS101	Phycobilisome Linker polypeptide./CpcD/allophycocyanin linker domain.		pfam00427
TCCM_0151.00000020	27665000	20450000	26650000	32681000	29841000	38893000	6248200	7123500	15259000	14772000	26717000	17347000	11794000	15924000	12552000	12710000	6579300	25356000	7321300	3862600	5062000	14932000	20168000	17703000	16975000	13008000	9057100	20030000	22728000	3705000	5003700	10053000	12935000	8509100	2540100	5389200	6106200	Bacteria;Cyanobacteria;unclassified;Oscillatoriales;unclassified;Trichodesmium;erythraeum;Trichodesmium erythraeum IMS101	D-3-phosphoglycerate dehydrogenase	KO:K00058	pfam02826
TCCM_0786.00000010	18993000	13236000	20542000	23676000	34236000	44239000	8363500	4929700	14285000	8136700	22496000	22480000	17688000	13632000	17556000	14031000	10682000	19987000	8478800	4871400	5038200	12525000	21473000	20449000	14026000	15805000	12443000	16752000	20224000	6286500	3835800	13263000	13495000	10863000	2167300	5962100	5779800	Bacteria;Cyanobacteria;unclassified;Oscillatoriales;unclassified;Trichodesmium;erythraeum;Trichodesmium erythraeum IMS101	Ribulose bisphosphate carboxylase small subunit	KO:K08698	pfam00101
TCCM_0644.00000020	7798100	11037000	15006000	17623000	27553000	32861000	5607200	7567500	18412000	12184000	33529000	26456000	16869000	10452000	3914100	18673000	13252000	31546000	24482000	4984400	4618500	36916000	49209000	29822000	20669000	28534000	28041000	29741000	34617000	2564700	3109300	22465000	9892400	9650100	6699000	11903000	6934200	Bacteria;Cyanobacteria;unclassified;Oscillatoriales;unclassified;Trichodesmium;erythraeum;Trichodesmium erythraeum IMS101	Polyketide synthase modules and related proteins		pfam14765
TCCM_0662.00000040	45176000	54896000	33794000	60041000	62395000	89973000	15329000	13806000	20811000	29338000	44328000	48582000	28274000	39927000	34649000	32383000	30918000	56712000	18815000	11232000	12486000	33330000	50701000	39503000	25335000	34131000	19677000	42759000	60523000	8820700	13315000	26506000	22519000	30007000	5138100	12103000	16836000	Bacteria;Cyanobacteria;unclassified;Oscillatoriales;unclassified;Trichodesmium;erythraeum;Trichodesmium erythraeum IMS101	Phycobilisome Linker polypeptide./CpcD/allophycocyanin linker domain.		pfam00427
TCCM_0522.00000020	45950000	35348000	16058000	20409000	30856000	46861000	6778000	30709000	61006000	75840000	78968000	60542000	7266300	9377300	4831200	82242000	51628000	158060000	69961000	19959000	31721000	71322000	111590000	92449000	39800000	76157000	37601000	42316000	47115000	599230	43296000	106560000	57747000	40823000	1887600	0	0	Bacteria;Actinobacteria;Actinobacteria;Actinomycetales;Nocardiaceae;Rhodococcus;erythropolis;Rhodococcus erythropolis PR4	Arylsulfatase A and related enzymes		pfam00884
TCCM_0099.00000050	50588000	44600000	50509000	51320000	57694000	75149000	12192000	8228900	22966000	20549000	9064500	12162000	21380000	26907000	28570000	19549000	14759000	36071000	11722000	3287500	4313000	19599000	35495000	20020000	18494000	18443000	14109000	19435000	15083000	10643000	9730300	16177000	6369200	5050800	5292300	22756000	15617000	Bacteria;Cyanobacteria;unclassified;Oscillatoriales;unclassified;Trichodesmium;erythraeum;Trichodesmium erythraeum IMS101	nitrogenase molybdenum-iron protein beta chain	KO:K02591	pfam00148
TCCM_0501.00000130	21265000	22442000	39949000	38035000	38191000	61002000	8521900	4245100	8492800	9445400	21863000	27617000	21604000	19897000	18411000	8421100	4951300	14048000	9162400	5728200	4604100	14429000	30474000	19587000	14662000	13107000	15061000	16824000	21157000	6143100	6837800	12811000	8446100	8868500	2840200	7624200	5579300	Bacteria;Cyanobacteria;unclassified;Oscillatoriales;unclassified;Trichodesmium;erythraeum;Trichodesmium erythraeum IMS101	translation elongation factor EF-G	KO:K02355	pfam00009
TCCM_0989.00000210	117740000	206800000	211350000	258990000	299350000	432310000	81328000	50736000	105050000	113170000	340060000	143880000	96588000	116950000	132760000	123840000	83238000	217900000	75183000	45613000	54478000	148540000	229960000	197490000	184450000	142840000	95071000	139860000	220450000	32975000	20067000	114660000	76882000	117780000	33302000	44049000	81255000	Bacteria;Cyanobacteria;unclassified;Oscillatoriales;unclassified;Trichodesmium;erythraeum;Trichodesmium erythraeum IMS101	F0F1-type ATP synthase, beta subunit	KO:K02112	pfam02874
TCCM_0310.00000010	99189000	62058000	101590000	104290000	102940000	144210000	35324000	19300000	47600000	41738000	92557000	56527000	57988000	54364000	41272000	45599000	30426000	83262000	17605000	16403000	20248000	25776000	37873000	73058000	42408000	29555000	16475000	59712000	67308000	6007000	8713600	25934000	60294000	35702000	8899700	25865000	28670000	Bacteria;Cyanobacteria;unclassified;Oscillatoriales;unclassified;Trichodesmium;erythraeum;Trichodesmium erythraeum IMS101
TCCM_0240.00000040	15525000	9960300	20814000	21317000	42844000	74819000	9374200	4764400	16032000	15492000	36523000	31012000	20035000	23158000	9904500	11477000	12515000	27915000	12256000	5778800	6430700	20580000	46462000	48138000	17231000	26689000	11787000	16116000	22567000	3025000	2113700	20544000	14051000	10722000	14718000	15406000	13079000	Bacteria;Cyanobacteria;unclassified;Oscillatoriales;unclassified;Trichodesmium;erythraeum;Trichodesmium erythraeum IMS101	ATP synthase, F1 delta subunit	KO:K02113	pfam00213
TCCM_0342.00000010	18918000	14274000	24148000	28117000	23955000	40317000	7275000	6518500	16504000	16610000	31059000	35635000	12406000	14072000	11798000	17386000	11222000	33834000	11906000	4959400	6119200	18888000	28317000	39809000	18184000	18672000	13290000	34190000	29839000	2602500	3865300	16141000	24847000	16951000	3864000	8738700	19389000	Bacteria;Cyanobacteria;unclassified;Oscillatoriales;unclassified;Trichodesmium;erythraeum;Trichodesmium erythraeum IMS101	transaldolase, mycobacterial type	KO:K00616	pfam00923
TCCM_0649.00000040	38660000	7068900	9626600	12343000	68436000	138550000	18833000	8651700	26429000	19847000	64844000	85711000	33390000	49808000	13059000	25500000	21751000	50472000	12625000	17460000	10605000	39516000	67849000	82264000	45717000	40258000	29483000	64138000	74215000	4718700	9368300	29974000	30861000	29509000	4470000	8949100	7513400	Bacteria;Cyanobacteria;unclassified;Oscillatoriales;unclassified;Trichodesmium;erythraeum;Trichodesmium erythraeum IMS101	Glyceraldehyde-3-phosphate dehydrogenase/erythrose-4-phosphate dehydrogenase	KO:K00150	pfam00044
TCCM_0040.00000020	21427000	19184000	25559000	23158000	22900000	32936000	7630700	5520400	10806000	10330000	19703000	19828000	14073000	10098000	11907000	8913500	9241800	21452000	9033600	3022800	3301700	15053000	18998000	16848000	15250000	13144000	10545000	17148000	17739000	2260100	3343300	13783000	9221200	11822000	1914700	9925000	11900000	Bacteria;Cyanobacteria;unclassified;Oscillatoriales;unclassified;Trichodesmium;erythraeum;Trichodesmium erythraeum IMS101	Sulfite reductase, alpha subunit (flavoprotein)	KO:K02641	pfam00175
TCCM_0486.00000180	111390000	107180000	84104000	169410000	233600000	338240000	76864000	56053000	81486000	102710000	148910000	148020000	112270000	155070000	74654000	167160000	59993000	230950000	28933000	61399000	73965000	30240000	48338000	138120000	59163000	39555000	28949000	147390000	155510000	17592000	95941000	35908000	92234000	80397000	6010600	25341000	16584000	Bacteria;Cyanobacteria;unclassified;Oscillatoriales;unclassified;Trichodesmium;erythraeum;Trichodesmium erythraeum IMS101	Phycobilisome protein.	KO:K05376	pfam00502
TCCM_0754.00000050	21966000	17923000	25718000	16674000	33399000	41889000	9944700	6240900	8409600	12668000	30672000	21870000	16561000	19495000	8554900	14090000	8891600	18060000	16408000	2909900	3930800	22485000	31970000	22405000	15346000	22039000	12571000	14300000	18532000	2610700	2426000	17153000	8637900	11306000	3549800	10274000	3423900	Bacteria;Cyanobacteria;unclassified;Oscillatoriales;unclassified;Trichodesmium;erythraeum;Trichodesmium erythraeum IMS101	Phycobilisome Linker polypeptide.	KO:K02096	pfam00427
TCCM_0346.00000180	34780000	20852000	25947000	21660000	61540000	89563000	13322000	11647000	26689000	12277000	29376000	26420000	28205000	45503000	61505000	21161000	20308000	50642000	10719000	6886300	7194800	22845000	38459000	31799000	21349000	18109000	15070000	29764000	47466000	10112000	2532200	17426000	16998000	16557000	9742000	26250000	14309000	Bacteria;Cyanobacteria;unclassified;Oscillatoriales;unclassified;Trichodesmium;erythraeum;Trichodesmium erythraeum IMS101	nitrogenase iron protein	KO:K02588	pfam00142
TCCM_0318.00000030	33464000	45232000	52327000	35242000	68855000	140460000	19632000	14280000	29988000	26981000	69389000	37025000	25146000	36017000	22161000	32957000	26784000	52960000	52886000	10737000	10332000	79570000	111750000	58516000	29548000	69926000	52734000	29910000	40873000	12588000	16900000	82193000	20761000	26532000	8791400	29167000	8383700	Bacteria;Cyanobacteria;unclassified;Oscillatoriales;unclassified;Trichodesmium;erythraeum;Trichodesmium erythraeum IMS101	photosystem II chlorophyll-binding protein CP47	KO:K02704	pfam00421
TCCM_0634.00000020	13545000	23751000	31541000	28062000	28839000	42756000	10087000	4728300	9762400	9046600	27039000	23962000	15875000	16409000	12910000	13081000	12470000	23686000	15508000	5116200	5179400	30352000	37590000	31883000	14987000	29523000	21888000	16907000	32635000	6980500	8906200	23451000	8984200	14087000	4980500	13429000	26990000	Bacteria;Cyanobacteria;unclassified;Oscillatoriales;unclassified;Trichodesmium;erythraeum;Trichodesmium erythraeum IMS101	Phycobilisome Linker polypeptide.	KO:K02290	pfam00427
TCCM_0618.00000030	13519000	15925000	16470000	14580000	20443000	36690000	6961500	5600600	9298500	11184000	16557000	14438000	14529000	14012000	9865200	8312200	5415500	13844000	5861000	1968900	2449200	10869000	15048000	12618000	9737700	9338300	8912800	12147000	13545000	2914400	1800600	7916200	5301900	7332600	2380500	5547000	7644000	Bacteria;Cyanobacteria;unclassified;Oscillatoriales;unclassified;Trichodesmium;erythraeum;Trichodesmium erythraeum IMS101	glycogen/starch/alpha-glucan phosphorylases	KO:K00688	pfam00343
TCCM_0240.00000020	35868000	46645000	77570000	65272000	80083000	123210000	25294000	16898000	32844000	33191000	65820000	67826000	37545000	46339000	47599000	32078000	29236000	56832000	33931000	12299000	14071000	63013000	77809000	47939000	39388000	51553000	46673000	37945000	48884000	10918000	15321000	62265000	26411000	31876000	10748000	25478000	16669000	Bacteria;Cyanobacteria;unclassified;Oscillatoriales;unclassified;Trichodesmium;erythraeum;Trichodesmium erythraeum IMS101	ATP synthase, F1 gamma subunit	KO:K02115	pfam00231
TCCM_0342.00000020	11328000	8783500	17814000	16651000	21057000	35282000	6389000	3620200	8694100	7642900	10176000	11920000	16618000	20642000	8180300	6934800	4880600	14981000	7305600	3004600	2977400	10638000	21835000	9961700	9582200	13420000	9414500	6501700	14222000	2707700	2404500	10356000	5764600	5661400	4528200	9698400	9833300	Bacteria;Cyanobacteria;unclassified;Oscillatoriales;unclassified;Trichodesmium;erythraeum;Trichodesmium erythraeum IMS101	glucose-6-phosphate 1-dehydrogenase	KO:K00036	pfam02781
TCCM_0118.00002690	56003000	35741000	21402000	19508000	31091000	44180000	6914100	32449000	65843000	71714000	146800000	98708000	10120000	10414000	4051100	91988000	88345000	160920000	60354000	31677000	45718000	64751000	137430000	137530000	70101000	93226000	40364000	58094000	64178000	0	30683000	81752000	80284000	71540000	4337500	0	0	Bacteria;Actinobacteria;Actinobacteria;Actinomycetales;Nocardiaceae;Rhodococcus;equi;Rhodococcus equi 103S	Arylsulfatase A and related enzymes
TCCM_0924.00000010	17987000	22299000	40831000	39902000	46155000	38564000	10719000	9665600	13353000	12418000	31460000	38595000	26529000	16890000	21913000	18067000	18060000	22561000	30683000	9604800	13640000	22117000	38074000	33026000	18719000	16240000	17561000	29277000	32969000	11902000	12351000	22678000	41825000	22640000	5307000	22582000	10069000	Bacteria;Cyanobacteria;unclassified;Oscillatoriales;unclassified;Trichodesmium;erythraeum;Trichodesmium erythraeum IMS101	Cna protein B-type domain.		pfam13620
TCCM_0822.00000130	32118000	40740000	61108000	99415000	20885000	9320100	5459900	801360	394100	3274700	21313000	9492800	25354000	37672000	34840000	8527300	734310	4488900	25876000	9171600	5573000	53035000	80784000	21529000	25085000	96440000	47234000	17616000	29809000	5786300	8740100	115590000	3771200	16915000	767440	12597000	27896000	Bacteria;Cyanobacteria;unclassified;Oscillatoriales;unclassified;Trichodesmium;erythraeum;Trichodesmium erythraeum IMS101	Secreted and surface protein containing fasciclin-like repeats		pfam02469
TCCM_0189.00000040	34173000	89167000	79358000	75791000	57424000	96809000	13090000	13544000	24249000	47162000	155960000	108430000	73426000	95980000	39166000	79024000	66012000	136060000	93466000	38662000	30503000	155260000	216000000	261870000	96590000	158660000	98474000	38587000	116310000	36393000	35556000	139330000	122300000	85286000	4942600	7354100	0	Bacteria;Cyanobacteria;unclassified;Oscillatoriales;unclassified;Trichodesmium;erythraeum;Trichodesmium erythraeum IMS101
TCCM_0002.00000010	34865000	26484000	32355000	32682000	30160000	52113000	10701000	7141300	11699000	14620000	20321000	26963000	15384000	29546000	22208000	11399000	12305000	23592000	11468000	4695700	7549200	20937000	24230000	22378000	13268000	16314000	15156000	23138000	15617000	8288100	3487800	20213000	16115000	12081000	3229900	11027000	14618000	Bacteria;Cyanobacteria;unclassified;Oscillatoriales;unclassified;Trichodesmium;erythraeum;Trichodesmium erythraeum IMS101	Transketolase		pfam00456
TCCM_0789.00003890	209420000	113540000	75912000	39814000	62610000	117010000	96085000	253590000	372730000	486530000	29411000	5911300	34980000	91778000	19197000	158540000	144340000	196170000	21471000	240940	0	8103800	18930000	9887200	14311000	2601700	801050	556890	508240	3462500	0	16720000	13686000	18727000	0	7003700	0	Eukaryota;Chordata;Actinopterygii;Cypriniformes;Cyprinidae;Danio;rerio;Danio rerio Tuebingen	Actin and related proteins	KO:K05692	pfam00022
TCCM_0012.00000020	20593000	16729000	32977000	29499000	44333000	79322000	12889000	8417000	16229000	20961000	37333000	57841000	14436000	31849000	14444000	21267000	18129000	40981000	17816000	9599200	11337000	23744000	38858000	33682000	35738000	21459000	17007000	33185000	30473000	3916400	4837700	21279000	24955000	24881000	11102000	26723000	18316000	Bacteria;Cyanobacteria;unclassified;Oscillatoriales;unclassified;Trichodesmium;erythraeum;Trichodesmium erythraeum IMS101	Nucleoside diphosphate kinase	KO:K00940	pfam00334
TCCM_0091.00000020	46959000	50114000	26904000	25242000	52529000	67702000	18260000	16389000	27552000	28215000	55090000	50253000	29203000	26808000	9930600	28501000	24807000	35755000	61588000	11129000	11411000	54436000	74345000	30096000	25367000	46554000	37616000	25692000	22244000	17173000	16855000	66418000	17675000	20873000	3324000	12705000	9579500	Bacteria;Cyanobacteria;unclassified;Oscillatoriales;unclassified;Trichodesmium;erythraeum;Trichodesmium erythraeum IMS101	photosystem I core protein PsaB	KO:K02690	pfam00223
TCCM_0517.00000150	53605000	43799000	53334000	70655000	93244000	121080000	20343000	17224000	35215000	26251000	31872000	25802000	61347000	74228000	65557000	25086000	17888000	41875000	16376000	5969500	5613000	29236000	35878000	37029000	15536000	30330000	21594000	25737000	28745000	7571200	5472900	24718000	16898000	13542000	4251800	17928000	16042000	Bacteria;Cyanobacteria;unclassified;Oscillatoriales;unclassified;Trichodesmium;erythraeum;Trichodesmium erythraeum IMS101	6-phosphogluconate dehydrogenase, decarboxylating	KO:K00033	pfam00393
TCCM_0078.00000260	37203000	11199000	19843000	18464000	64831000	63420000	10268000	7634900	13615000	19273000	37121000	19866000	19998000	18301000	18468000	17245000	13760000	36063000	11328000	7684200	7758900	17728000	25264000	33173000	24759000	17794000	14247000	21405000	29428000	7885400	6031700	19328000	13276000	14149000	5127200	9974600	8092000	Bacteria;Cyanobacteria;unclassified;Oscillatoriales;unclassified;Trichodesmium;erythraeum;Trichodesmium erythraeum IMS101	Molecular chaperone, HSP90 family	KO:K04079	pfam00183
TCCM_0018.00000050	13181000	18613000	22836000	20805000	24567000	44337000	6862000	6455200	12460000	13416000	19581000	18148000	8317900	11079000	8740600	16753000	11939000	31876000	20453000	5630000	7403200	26991000	46093000	33456000	22402000	23221000	21092000	19038000	26413000	4530800	6258700	17929000	25211000	18833000	2893200	8309000	8617900	Bacteria;Cyanobacteria;unclassified;Oscillatoriales;unclassified;Trichodesmium;erythraeum;Trichodesmium erythraeum IMS101	phosphate ABC transporter, phosphate-binding protein	KO:K02040	pfam12849
TCCM_0060.00000340	45920000	49831000	96623000	91110000	27296000	43559000	7540800	13293000	16077000	30618000	100990000	86705000	8943700	13826000	23111000	44786000	44418000	93186000	42601000	7855300	9201700	47157000	99048000	98296000	57511000	56027000	49581000	38824000	32392000	1103500	6192200	62266000	56061000	34791000	0	0	0
TCCM_0474.00000110	19148000	32085000	28034000	28601000	5153100	7143100	1872500	8049100	13510000	17740000	50684000	74760000	10545000	17441000	17577000	31824000	29816000	56568000	23895000	13284000	12062000	25121000	62002000	66939000	39831000	49213000	22785000	45941000	49716000	4243800	19042000	30738000	33598000	18848000	1138400	6010000	362150	Bacteria;Actinobacteria;Actinobacteria;Actinomycetales;Mycobacteriaceae;Mycobacterium;smegmatis;Mycobacterium smegmatis MC2 155	Mannose-6-phosphate isomerase		pfam00190
TCCM_0254.00000150	6494800	8843900	13165000	10700000	11245000	19245000	4888700	4351600	10336000	8041800	20933000	21304000	6704400	4645000	5192800	9910700	7722500	13550000	8534100	3599900	3962900	12193000	23444000	20576000	14240000	15267000	8767600	14482000	12277000	2369100	1740800	10403000	12396000	7535200	694390	2418900	6486500	Bacteria;Cyanobacteria;unclassified;Nostocales;Nostocaceae;Nodularia;spumigena;Nodularia spumigena CCY9414	Serine protease inhibitor		pfam00079
TCCM_0699.00000090	18385000	20568000	23269000	18935000	40355000	62286000	11057000	4973400	10484000	11709000	23555000	14190000	18462000	14167000	9578700	9275600	9797500	19426000	9498800	4094600	2696200	21918000	29090000	22845000	10418000	16721000	11275000	11119000	15503000	3801100	3914200	12282000	6537500	7263700	3693000	18080000	19017000	Bacteria;Cyanobacteria;unclassified;Oscillatoriales;unclassified;Trichodesmium;erythraeum;Trichodesmium erythraeum IMS101
TCCM_0310.00000020	11990000	24988000	38858000	28261000	45268000	66800000	6681100	4636100	8895900	12664000	26382000	22437000	18267000	25729000	15212000	8504700	9309500	16999000	10873000	4305300	5056100	16508000	36654000	22932000	15449000	21588000	15115000	16320000	20318000	4533500	4108200	16163000	6099400	10008000	7369900	14314000	12958000	Bacteria;Cyanobacteria;unclassified;Oscillatoriales;unclassified;Trichodesmium;erythraeum;Trichodesmium erythraeum IMS101	ATP-dependent metalloprotease FtsH	KO:K03798	pfam01434
TCCM_0275.00000010	10384000	11976000	16657000	12770000	14984000	24723000	5098200	3298100	6967400	7166700	8999600	8699200	6965000	8892700	9551500	6709200	5477700	10988000	4172200	1202000	1717100	6614400	12051000	9847100	4856700	9141500	5446600	5547600	8242700	2355200	1453500	5846200	5103300	4235400	2493900	5604700	5820400	Bacteria;Cyanobacteria;unclassified;Oscillatoriales;unclassified;Trichodesmium;erythraeum;Trichodesmium erythraeum IMS101	Predicted Zn-dependent peptidases, insulinase-like	KO:K06972	pfam08367
TCCM_0692.00000030	16891000	23602000	41687000	35928000	36705000	50594000	13562000	8510800	16827000	15361000	28721000	31272000	23293000	24390000	19479000	18441000	14796000	32054000	20906000	7586200	8242900	34926000	45474000	34205000	25021000	28181000	29022000	20350000	27086000	3543200	7899000	28389000	20550000	9987400	7515600	9569300	21738000	Bacteria;Cyanobacteria;unclassified;Oscillatoriales;unclassified;Trichodesmium;erythraeum;Trichodesmium erythraeum IMS101	Nitrogen regulatory protein PII	KO:K04751	pfam00543
TCCM_0898.00000030	8833700	12806000	20424000	19861000	35524000	42673000	7806900	5755200	10678000	13892000	52002000	43489000	7516600	12014000	9206400	17225000	10965000	29313000	12598000	6084200	7860000	13145000	22713000	44493000	30077000	12150000	9167000	21261000	31403000	2337800	3505100	13971000	21659000	25513000	3956000	12335000	6874600	Bacteria;Cyanobacteria;unclassified;Oscillatoriales;unclassified;Trichodesmium;erythraeum;Trichodesmium erythraeum IMS101	Trypsin-like serine proteases, typically periplasmic, contain C-terminal PDZ domain	KO:K08070	pfam13365
TCCM_0245.00000350	67865000	0	0	0	46345000	181690000	17749000	22953000	40198000	53148000	117100000	94565000	59021000	65400000	6570200	85477000	29987000	72082000	43931000	12723000	25623000	110540000	211960000	216900000	144160000	111250000	68400000	84133000	112540000	7021900	24022000	102880000	78331000	67241000	1707000	4405200	37528000	Bacteria;Cyanobacteria;unclassified;Oscillatoriales;unclassified;Trichodesmium;erythraeum;Trichodesmium erythraeum IMS101
TCCM_0240.00000060	33442000	13548000	35105000	16890000	50209000	73500000	8460600	6675100	12876000	12999000	12883000	16246000	14588000	19851000	12780000	13152000	7709800	22644000	11315000	5288700	4397700	19794000	30787000	34215000	11124000	20820000	12823000	10937000	23588000	6233600	2925500	20863000	9524200	5526900	5933200	13017000	3638100	Bacteria;Cyanobacteria;unclassified;Oscillatoriales;unclassified;Trichodesmium;erythraeum;Trichodesmium erythraeum IMS101	F0F1-type ATP synthase, subunit b	KO:K02109	pfam00430
TCCM_0780.00000020	5020800	612870	4442200	9136500	20518000	18304000	1944300	2104000	2965200	4531300	27088000	26896000	14340000	13953000	6192000	7129500	10587000	17088000	9372700	5449800	4471000	7283500	9555400	16108000	17047000	12451000	8350000	12986000	21570000	809290	1831500	9353100	11373000	12715000	903750	2970100	904950	Bacteria;Cyanobacteria;unclassified;Oscillatoriales;unclassified;Trichodesmium;erythraeum;Trichodesmium erythraeum IMS101
TCCM_0467.00000110	16411000	5876300	10115000	5853700	27565000	41351000	6484100	6199700	11321000	14738000	38181000	44343000	13158000	18924000	9335400	19945000	14952000	35489000	12443000	6050300	7808300	26667000	40678000	42691000	24237000	25352000	15967000	18867000	31042000	1432700	3045600	20662000	21083000	21560000	1328700	6532000	0	Bacteria;Cyanobacteria;unclassified;Oscillatoriales;unclassified;Trichodesmium;erythraeum;Trichodesmium erythraeum IMS101	RNA-binding proteins (RRM domain)		pfam00076
TCCM_0248.00000020	19623000	32195000	39424000	28779000	64903000	102910000	19523000	8736900	19118000	22525000	60709000	53274000	31735000	26714000	19205000	36035000	19079000	57137000	29426000	10663000	7980100	29928000	53879000	44460000	36518000	30220000	23798000	40456000	35848000	7834700	8886100	31768000	24873000	22627000	9894500	20063000	6936200	Bacteria;Cyanobacteria;unclassified;Oscillatoriales;unclassified;Trichodesmium;erythraeum;Trichodesmium erythraeum IMS101	photosystem II 44 kDa subunit reaction center protein (also called P6 protein, CP43), bacterial and chloroplast	KO:K02705	pfam00421
TCCM_0430.00000010	3090300	5332500	12323000	12282000	7643500	15912000	2621400	2152700	5005500	4398600	9902900	13167000	5940500	5944000	4714300	4790300	2960600	7482700	5256700	2994700	2827400	9965300	19845000	14057000	10459000	13860000	6965700	9139500	9416700	996510	1791600	8416000	5026300	6066900	1115400	3108700	7588100	Bacteria;Cyanobacteria;unclassified;Oscillatoriales;unclassified;Trichodesmium;erythraeum;Trichodesmium erythraeum IMS101	trigger factor	KO:K03545	pfam05697
TCCM_0169.00000030	3990000	3024600	38473000	41188000	106670000	96549000	21205000	3803700	11446000	16107000	39041000	28926000	73152000	68605000	30205000	4068200	3703600	7558700	2545700	4192100	5606000	13277000	40229000	37810000	25633000	27693000	16344000	34257000	45422000	2800200	2462800	2949500	4311900	4755900	25382000	44544000	6378300	Bacteria;Cyanobacteria;unclassified;Oscillatoriales;unclassified;Trichodesmium;erythraeum;Trichodesmium erythraeum IMS101	Fructose-1,6-bisphosphate aldolase	KO:K01623	pfam00274
TCCM_0576.00000170	46816000	18577000	8407400	11763000	15273000	28830000	5182700	25463000	32509000	39362000	38834000	51856000	5036200	10050000	2946400	62303000	53307000	76535000	70624000	17925000	27974000	60294000	102920000	87910000	55062000	80878000	35253000	38488000	57393000	831130	21688000	106660000	34470000	51651000	2059400	0	0	Bacteria;Bacteroidetes;Bacteroidia;Bacteroidales;Bacteroidaceae;Bacteroides;sp.;Bacteroides sp. 1_1_6
TCCM_0352.00000020	47208000	64963000	73803000	84081000	54441000	63436000	13464000	11105000	23075000	26241000	20267000	15510000	30185000	34234000	40962000	19808000	13507000	24944000	21975000	4975200	8354700	21953000	29000000	16027000	7157000	20990000	15077000	14191000	12810000	19575000	9193000	22908000	14161000	12101000	9374600	18895000	17132000	Bacteria;Cyanobacteria;unclassified;Oscillatoriales;unclassified;Oscillatoria;sp.;Oscillatoria sp. PCC 6506
TCCM_0115.00000030	4419300	7388100	8516800	7389500	8220900	20696000	2943500	4121000	5610700	6497400	3023300	17232000	14436000	10900000	2740900	10674000	6803300	15672000	6525700	791760	2938900	12124000	18142000	6084000	2766800	11251000	8999400	10270000	8621800	5247000	3149700	15628000	5670200	11205000	4221500	5570900	13636000	Bacteria;Cyanobacteria;unclassified;Oscillatoriales;unclassified;Trichodesmium;erythraeum;Trichodesmium erythraeum IMS101	Phage-related lysozyme (muraminidase)
TCCM_0555.00000020	9497200	28183000	36348000	30060000	44703000	64822000	6961900	4454900	8470800	11884000	25382000	21051000	19940000	23901000	16067000	9265600	10297000	14553000	7185700	4102000	4980900	11582000	30458000	21747000	15744000	16172000	10455000	15160000	19450000	3640000	3977700	10560000	6128200	9397700	7130200	13813000	13118000	Bacteria;Cyanobacteria;unclassified;Oscillatoriales;unclassified;Trichodesmium;erythraeum;Trichodesmium erythraeum IMS101	ATP-dependent metalloprotease FtsH	KO:K03798	pfam01434
TCCM_0877.00000020	13929000	18731000	52359000	65318000	28565000	42009000	9377600	5605500	13832000	13386000	39372000	43411000	26057000	26361000	25748000	14385000	10154000	26646000	15498000	8703300	8586900	25508000	40955000	48319000	27742000	25123000	24506000	38713000	42178000	2509500	6150100	15703000	20972000	16305000	3344100	7662300	7296800	Bacteria;Cyanobacteria;unclassified;Oscillatoriales;unclassified;Trichodesmium;erythraeum;Trichodesmium erythraeum IMS101	ABC-type Fe3+ transport system, periplasmic component	KO:K02012	pfam13343
TCCM_0330.00000020	8131300	12016000	20610000	13742000	15102000	20328000	4732000	4944700	10382000	9577600	12054000	11255000	7330300	7182900	10290000	10102000	6810200	18237000	10826000	4155700	3466800	23845000	28291000	18611000	14617000	19935000	13529000	15803000	12856000	1290900	2069300	18551000	6741500	7486800	2724700	6368600	4203200	Bacteria;Cyanobacteria;unclassified;Oscillatoriales;unclassified;Trichodesmium;erythraeum;Trichodesmium erythraeum IMS101	Serine-pyruvate aminotransferase/archaeal aspartate aminotransferase	KO:K00839	pfam00266
TCCM_0494.00000030	39558000	24965000	21302000	30581000	37559000	76066000	14368000	7865400	19772000	21578000	39741000	38205000	31913000	30598000	22043000	20620000	15030000	39162000	12039000	6837200	9222900	20965000	36114000	49765000	28145000	24195000	15513000	31921000	24402000	2717200	6091000	14012000	16824000	20452000	3581200	8026800	2438000	Bacteria;Cyanobacteria;unclassified;Oscillatoriales;unclassified;Trichodesmium;erythraeum;Trichodesmium erythraeum IMS101	ribosomal protein S5, bacterial/organelle type	KO:K02988	pfam03719
TCCM_0404.00000070	12714000	19988000	22636000	26527000	13236000	27903000	5082500	4301500	9636000	11476000	17329000	18881000	10852000	13001000	12056000	9105500	7855500	11560000	6733200	2303600	3137200	10593000	17595000	12515000	7558400	11896000	7780500	11130000	16597000	2885500	3424900	11750000	7865000	8271000	2274200	5369100	9245900	Bacteria;Cyanobacteria;unclassified;Oscillatoriales;unclassified;Trichodesmium;erythraeum;Trichodesmium erythraeum IMS101	glucose-1-phosphate adenylyltransferase	KO:K00975	pfam00483
TCCM_0830.00000100	20695000	15460000	13682000	10985000	16503000	24196000	4423200	5858800	9923000	10176000	21118000	22289000	3778300	5933100	6369600	10948000	8734500	20245000	13284000	5151900	6133500	14566000	21971000	22842000	14073000	12374000	8852000	9991100	13124000	3022800	5678600	17395000	16647000	12342000	729940	1139000	6908100	Bacteria;Cyanobacteria;unclassified;Oscillatoriales;unclassified;Trichodesmium;erythraeum;Trichodesmium erythraeum IMS101	Predicted phosphatase	KO:K07093	pfam05787
TCCM_0715.00000110	46642000	55710000	74251000	97301000	75682000	132230000	27323000	13758000	42577000	31628000	48808000	32328000	45681000	48204000	41444000	25538000	20929000	44914000	26833000	14980000	15564000	49547000	66472000	54387000	35958000	41946000	24437000	57305000	72264000	16898000	18417000	46108000	30991000	38540000	4403100	10099000	20882000	Bacteria;Cyanobacteria;unclassified;Oscillatoriales;unclassified;Trichodesmium;erythraeum;Trichodesmium erythraeum IMS101	Transketolase	KO:K00615	pfam02779
TCCM_0240.00000050	39472000	3063900	8667600	3126000	63228000	80215000	13238000	7806700	13057000	14259000	31357000	48263000	27273000	21823000	12321000	21442000	10339000	35006000	15357000	6969600	9181200	30704000	63037000	42463000	31660000	26577000	18488000	22495000	33759000	12174000	8610900	30070000	14534000	12524000	5454100	16570000	8556800	Bacteria;Cyanobacteria;unclassified;Oscillatoriales;unclassified;Trichodesmium;erythraeum;Trichodesmium erythraeum IMS101	ATP synthase, F0 subunit b	KO:K02109	pfam00430
TCCM_0518.00000920	279160000	41500000	29642000	9065700	134890000	182540000	88677000	192290000	65847000	295520000	38125000	9133500	59134000	51498000	46313000	54148000	78248000	50032000	16354000	0	0	1562000	13281000	16352000	15682000	537690	446550	0	824140	1015100	0	15639000	19532000	13488000	0	0	0	Eukaryota;Chordata;Actinopterygii;Cypriniformes;Cyprinidae;Danio;rerio;Danio rerio Tuebingen	Actin and related proteins	KO:K05692	pfam00022
TCCM_0201.00000010	11687000	16515000	31263000	29963000	42703000	51066000	8203200	3720900	6971100	9317600	44001000	30949000	10786000	22530000	17838000	13989000	7037300	23564000	15727000	3551700	9774100	25431000	53100000	57270000	19299000	32790000	12882000	13197000	31875000	2089700	3496300	26736000	11037000	14358000	7879900	19447000	29499000	Bacteria;Cyanobacteria;unclassified;Nostocales;Nostocaceae;Nostoc;punctiforme;Nostoc punctiforme PCC 73102	Glutathione S-transferase		pfam13417
TCCM_0226.00005310	3349600	5938400	11597000	18589000	15486000	13962000	3352200	7433200	21492000	4535000	83501000	80680000	7453900	3269300	1305600	15472000	21099000	52262000	46538000	27753000	32907000	64692000	125350000	91106000	28874000	74807000	44151000	10744000	53110000	105930	8421200	62171000	42787000	25511000	5320500	12226000	0	Bacteria;Proteobacteria;Gammaproteobacteria;Enterobacteriales;Enterobacteriaceae;Citrobacter;rodentium;Citrobacter rodentium ICC168	Chitinase		pfam00704
TCCM_0654.00000010	10935000	5285800	9905100	10935000	15476000	21987000	3701700	2021900	4971700	4655700	9951900	8927300	7696100	11197000	6530300	5427900	3215500	10408000	3404600	1825500	2291800	6461800	9924700	7693700	6218100	5769500	5594300	8030200	8159300	1428800	2120000	4393800	3633900	3846900	1482900	4374100	2709900	Bacteria;Cyanobacteria;unclassified;Oscillatoriales;unclassified;Trichodesmium;erythraeum;Trichodesmium erythraeum IMS101	preprotein translocase, SecA subunit	KO:K03070	pfam07517
TCCM_0011.00000010	11874000	13202000	11089000	10886000	11179000	31010000	5794700	2334600	5265500	6575100	16893000	18332000	8090300	12070000	8415200	10757000	5575900	6862400	8587500	2807400	2815300	6748100	10299000	16241000	8217400	7329800	4817900	10281000	12364000	566880	813480	8615800	8380700	9914400	2877100	15897000	3370200	Bacteria;Cyanobacteria;unclassified;Oscillatoriales;unclassified;Trichodesmium;erythraeum;Trichodesmium erythraeum IMS101
TCCM_0625.00000030	37287000	11788000	10275000	15494000	51921000	42088000	11836000	10787000	9102400	21561000	65768000	77869000	18025000	22834000	4727200	38629000	12775000	34676000	7668900	11073000	13406000	18651000	17942000	63834000	34303000	9152800	13460000	27442000	31469000	960010	7891200	13377000	27390000	22151000	809140	3472400	13131000	Bacteria;Cyanobacteria;unclassified;Oscillatoriales;unclassified;Trichodesmium;erythraeum;Trichodesmium erythraeum IMS101	PsaD.	KO:K02692	pfam02531
TCCM_0363.00000030	6660800	13744000	18818000	20735000	11236000	14461000	4692300	2462200	5761900	6886300	8176500	6467700	8311500	8607200	11757000	5848600	4132400	7762400	3302200	1572100	1392900	5229300	9830800	6179500	4069300	5427500	4460300	7325500	5787200	2143700	1527400	4696600	3349000	4927900	1464400	5139400	3608600	Bacteria;Cyanobacteria;unclassified;Oscillatoriales;unclassified;Trichodesmium;erythraeum;Trichodesmium erythraeum IMS101	acetate--CoA ligase	KO:K01895	pfam00501
TCCM_0944.00000200	44434000	48499000	55177000	56926000	49172000	64830000	12417000	10288000	19721000	20761000	17523000	16358000	25271000	28551000	20506000	18752000	12165000	30293000	13489000	2800400	3412500	18063000	32761000	15564000	8568900	23960000	14065000	11430000	9559100	4878900	2760300	23272000	11297000	12046000	4877400	15205000	23954000	Bacteria;Cyanobacteria;unclassified;Oscillatoriales;unclassified;Arthrospira;maxima;Arthrospira maxima CS-328	Phycobilisome protein.	KO:K02095	pfam00502
TCCM_0871.00000220	9113100	5934700	8903000	13977000	11344000	19636000	2186300	9320300	19851000	21294000	4355200	4811800	2708000	3306600	2934800	39283000	31056000	68224000	19402000	4278100	3173700	23792000	36574000	5478500	4999400	22793000	17540000	4257300	4595000	1618600	6467700	23809000	6456300	4488100	1094700	0	0
TCCM_0711.00000020	13410000	0	4660400	2071500	9948600	17956000	2908200	2445200	6952000	9543300	48291000	39200000	11534000	14521000	5328900	14140000	9646600	30976000	8491300	6881800	6178100	26061000	34942000	50320000	21303000	23047000	9174700	30632000	21905000	1988500	4068400	14456000	14628000	8419000	132530	0	0	Bacteria;Cyanobacteria;unclassified;Oscillatoriales;unclassified;Trichodesmium;erythraeum;Trichodesmium erythraeum IMS101	Predicted solute binding protein		pfam07498
TCCM_0113.00000040	22791000	1579500	4114000	6679500	52944000	70723000	12046000	7320700	16578000	24126000	48296000	34019000	7317800	17773000	3141900	29282000	17847000	38080000	16880000	12670000	10146000	19489000	41443000	50574000	43321000	24845000	14605000	18983000	25887000	1376700	6797800	24823000	22665000	18257000	6393500	16194000	2372900	Bacteria;Cyanobacteria;unclassified;Oscillatoriales;unclassified;Trichodesmium;erythraeum;Trichodesmium erythraeum IMS101			pfam14015
TCCM_0397.00000050	10106000	7406200	9160500	11418000	12065000	16673000	2701000	2194700	2565700	3925500	12090000	7375100	3356400	3898800	4353300	6301300	4780500	9923300	4997800	1908400	2744700	7904000	14078000	9218900	4676600	7462500	4581100	5777100	6464700	709050	1862800	6559700	3946000	3793500	538850	3351300	2856800	Bacteria;Cyanobacteria;unclassified;Oscillatoriales;unclassified;Trichodesmium;erythraeum;Trichodesmium erythraeum IMS101	cyanobactin maturation protease, PatA/PatG family		pfam00082
TCCM_0464.00000010	2163300	3251500	4352000	4912700	8905700	15866000	2194900	2766300	4768300	5091300	21774000	16569000	6028800	3940800	3549600	9043400	7307300	15855000	6583300	5006000	5865100	9295900	19870000	21454000	16179000	10588000	9413300	13426000	20586000	443040	2796700	7953200	11775000	13977000	403770	1177700	0	Bacteria;Cyanobacteria;unclassified;Chroococcales;unclassified;Cyanothece;sp.;Cyanothece sp. PCC 7822			pfam09118
TCCM_0708.00000030	1468000	3034500	7393400	4556500	20438000	30132000	4687800	6025000	15503000	10820000	24991000	30495000	10309000	16408000	824190	18632000	15301000	27786000	22835000	8584900	9315800	24926000	38357000	28684000	15867000	28962000	18226000	24548000	26313000	3947300	10416000	25221000	15869000	13210000	0	761410	9845200	Bacteria;Cyanobacteria;unclassified;Oscillatoriales;unclassified;Trichodesmium;erythraeum;Trichodesmium erythraeum IMS101	Uncharacterized protein conserved in bacteria		pfam10009
TCCM_0214.00000030	32834000	26981000	36841000	44351000	27633000	72798000	9667400	6316100	15084000	20126000	46678000	53409000	13406000	18644000	10473000	30349000	16730000	44543000	14669000	5259800	8222900	36238000	50480000	53714000	27188000	36158000	16857000	29437000	32722000	4650400	8148300	28410000	14462000	14281000	1436900	14014000	8265600	Bacteria;Cyanobacteria;unclassified;Oscillatoriales;unclassified;Trichodesmium;erythraeum;Trichodesmium erythraeum IMS101	Manganese-stabilising protein / photosystem II polypeptide.	KO:K02716	pfam01716
TCCM_0751.00000090	21928000	10542000	11597000	12187000	28137000	37105000	8153400	2716400	9433100	10598000	24860000	25509000	9648100	14383000	10941000	10988000	8390800	23707000	3639000	3220900	4178200	5031500	10845000	20391000	14619000	6020700	4032800	18613000	19986000	1678400	2974600	5963300	9034100	8844700	3127100	8239300	11016000	Bacteria;Cyanobacteria;unclassified;Oscillatoriales;unclassified;Trichodesmium;erythraeum;Trichodesmium erythraeum IMS101	Ribosomal protein S1	KO:K02945	pfam00575
TCCM_0237.00000160	7455200	15661000	23804000	23600000	13012000	34284000	4635200	4467900	10808000	8990100	15192000	22712000	12735000	13081000	6956300	9072300	7037900	13958000	9874800	3853500	2831900	13783000	24484000	14278000	9508100	15055000	9578800	12891000	8974500	521240	1978600	12964000	6216100	6208100	2523500	7580900	4431700	Bacteria;Cyanobacteria;unclassified;Oscillatoriales;unclassified;Trichodesmium;erythraeum;Trichodesmium erythraeum IMS101	Protease subunit of ATP-dependent Clp proteases	KO:K01358	pfam00574
TCCM_0391.00000010	10999000	18934000	20849000	22716000	12616000	31725000	5986000	4919600	9171400	10717000	12906000	9963000	11304000	12601000	11914000	8365900	6776400	15071000	5585400	1717200	2471100	10205000	12400000	10040000	5812700	10016000	5917600	8270800	10514000	2093200	2964200	9442300	6809100	4403200	1824800	4381500	3441300	Bacteria;Cyanobacteria;unclassified;Oscillatoriales;unclassified;Trichodesmium;erythraeum;Trichodesmium erythraeum IMS101	Phosphoketolase	KO:K01621	pfam03894
TCCM_0065.00000020	14841000	17347000	30512000	29571000	31923000	45948000	7402100	3077600	11694000	7179700	22216000	16562000	14182000	19566000	16155000	11075000	5776800	23738000	8631300	5751600	4532600	15821000	27549000	19230000	12124000	17661000	10830000	14935000	17346000	3864100	2488800	15486000	14280000	9791300	2939800	7226800	8564100	Bacteria;Cyanobacteria;unclassified;Oscillatoriales;unclassified;Trichodesmium;erythraeum;Trichodesmium erythraeum IMS101			pfam14250
TCCM_0832.00000120	4210400	6063400	7001200	11145000	11220000	19233000	3705400	3202200	9106100	9038500	16279000	18227000	10208000	9187400	1291300	16166000	3253200	20511000	13026000	4075900	2488500	19834000	42423000	15209000	13359000	24739000	10278000	17212000	21003000	1237800	777140	13606000	5786100	7602100	2089000	4346000	0	Bacteria;Cyanobacteria;unclassified;Chroococcales;unclassified;Cyanothece;sp.;Cyanothece sp. BH68, ATCC 51142	Dehydrogenases with different specificities (related to short-chain alcohol dehydrogenases)		pfam08659
TCCM_0630.00000160	70850000	99309000	32062000	39789000	49735000	84145000	18356000	10294000	29520000	27771000	77711000	39428000	21149000	36500000	18543000	40869000	21065000	65862000	30515000	12097000	15365000	44168000	47871000	48382000	36174000	28591000	31231000	30810000	26405000	17931000	11463000	43766000	40864000	27771000	2836700	7601800	1995900	Bacteria;Cyanobacteria;unclassified;Oscillatoriales;unclassified;Trichodesmium;erythraeum;Trichodesmium erythraeum IMS101	Photosystem I reaction centre subunit III.	KO:K02694	pfam02507
TCCM_0824.00000140	8393700	3664300	9902200	13767000	13151000	12814000	3349800	5177700	6679100	7840800	15929000	14838000	7176000	9200800	2862000	11699000	6467500	12465000	8111500	3696200	2643500	14046000	19059000	13396000	10444000	12360000	9622200	9855100	21457000	4359500	1883700	9985000	5564000	8471900	1826100	5584900	2291000	Bacteria;Cyanobacteria;unclassified;Chroococcales;unclassified;Cyanothece;sp.;Cyanothece sp. BH68, ATCC 51142	Polyketide synthase modules and related proteins		pfam00109
TCCM_0011.00000270	41463000	65305000	103210000	94273000	61674000	84360000	21045000	12120000	16518000	19098000	1102300	560520	25625000	32548000	61684000	25532000	14067000	37470000	35977000	879630	276220	64505000	126550000	19544000	776450	99028000	57572000	252590	511650	4933900	11684000	75853000	6361700	7647700	9485100	38456000	17543000	Bacteria;Cyanobacteria;unclassified;Oscillatoriales;unclassified;Trichodesmium;erythraeum;Trichodesmium erythraeum IMS101	F0F1-type ATP synthase, beta subunit	KO:K02112	pfam00306
TCCM_0018.00000040	6962100	8151300	7421600	8479400	11063000	24051000	4389500	3883400	10385000	10166000	10248000	10373000	5277600	7357500	3455200	8233500	7869500	21621000	9258700	1791900	4018300	13094000	23588000	14564000	10008000	11225000	11559000	6450800	15791000	2756900	5429000	10567000	16807000	9344900	599850	1561800	7470900	Bacteria;Cyanobacteria;unclassified;Oscillatoriales;unclassified;Trichodesmium;erythraeum;Trichodesmium erythraeum IMS101	phosphate ABC transporter, phosphate-binding protein	KO:K02040	pfam12849
TCCM_0588.00000010	10023000	11750000	16702000	17689000	28586000	37499000	6608200	5325500	12973000	10944000	26213000	22064000	14959000	16203000	6718100	10487000	8178300	19094000	5857200	5952500	5530100	10335000	22567000	20462000	13553000	12480000	7413000	13001000	16452000	2011000	1347400	7973000	6629800	10274000	969630	3535200	6472400	Bacteria;Cyanobacteria;unclassified;Oscillatoriales;unclassified;Trichodesmium;erythraeum;Trichodesmium erythraeum IMS101	NAD-dependent aldehyde dehydrogenases	KO:K00128	pfam00171
TCCM_0869.00000010	9337900	6101700	11511000	11948000	13218000	25322000	4575800	3808300	6199100	5386700	18712000	14848000	6317400	5687600	7846900	7532200	5143800	12745000	7004400	2795900	2674000	10785000	14395000	12980000	8942900	11218000	8160600	11431000	15386000	1969000	2278400	10277000	5983900	7902300	2043700	3384800	687930	Bacteria;Cyanobacteria;unclassified;Oscillatoriales;unclassified;Trichodesmium;erythraeum;Trichodesmium erythraeum IMS101	NAD/NADP transhydrogenase alpha subunit	KO:K00324	pfam01262
TCCM_0773.00000080	21310000	15917000	21847000	27845000	22770000	32760000	6335400	6723000	11867000	11511000	24730000	29336000	10010000	17559000	12436000	12631000	9024400	20883000	7657700	4702100	3239200	13887000	21534000	20428000	16722000	14615000	10143000	14270000	21828000	2873700	2960500	13743000	15181000	11073000	1153500	5212500	3269900	Bacteria;Cyanobacteria;unclassified;Oscillatoriales;unclassified;Trichodesmium;erythraeum;Trichodesmium erythraeum IMS101	phosphopyruvate hydratase	KO:K01689	pfam00113
TCCM_0877.00000340	36919000	14859000	33912000	27536000	70757000	81389000	8493000	6997500	14198000	12153000	10838000	7579000	45372000	52675000	33533000	10166000	8257000	17655000	17124000	1107100	1544700	18399000	57497000	4086900	15309000	25711000	16394000	24228000	26845000	13475000	4391700	19848000	3500400	3192400	9183100	13621000	11862000	Bacteria;Cyanobacteria;unclassified;Oscillatoriales;unclassified;Lyngbya;sp.;Lyngbya sp. CCY 8106	6-phosphogluconate dehydrogenase	KO:K00033	pfam00393
TCCM_0009.00000360	22221000	26945000	38796000	50343000	36695000	57230000	7157700	6940300	9667800	16507000	21435000	15335000	11009000	10822000	20901000	15894000	11407000	17833000	13934000	3421800	3385300	10930000	20988000	21479000	10545000	11387000	8040000	9927000	12497000	3318000	3167000	14271000	13849000	12376000	7463400	13433000	3156400	Bacteria;Cyanobacteria;unclassified;Oscillatoriales;unclassified;Trichodesmium;erythraeum;Trichodesmium erythraeum IMS101
TCCM_0051.00005950	0	0	0	0	223360	260000	0	14996	494460	1362800	0	0	0	0	0	141160	332420	321050	588090	0	0	114280	144150	0	0	0	0	0	0	0	0	0	0	0	0	0	0	Eukaryota;Arthropoda;Insecta;Diptera;Drosophilidae;Drosophila;melanogaster;Drosophila melanogaster y; cn bw sp	Actin and related proteins	KO:K05692	pfam00022
TCCM_0476.00000020	5254600	6662800	10939000	11480000	17732000	26654000	4754100	1720600	5847700	5550800	10717000	14203000	6926200	8042700	6476500	4786400	4022400	11274000	2780000	2002200	1723500	4241500	6947400	10026000	7683500	3816800	3251700	9267200	9093100	1096100	599330	4163400	3182200	4640400	2337300	5288800	3566500	Bacteria;Cyanobacteria;unclassified;Oscillatoriales;unclassified;Trichodesmium;erythraeum;Trichodesmium erythraeum IMS101	TIGR00300 family protein		pfam04455
TCCM_0442.00005860	92881000	70480000	66688000	34606000	59582000	95313000	19785000	189590000	243340000	423570000	10482000	4576500	25431000	28099000	15483000	227690000	239000000	181180000	9086700	900430	4093800	0	1799900	22181000	7054700	583470	0	940650	1227700	5073100	0	15151000	9410400	14969000	0	3410300	0	Eukaryota;Chordata;Mammalia;Primates;Hominidae;Homo;sapiens;Homo sapiens	Actin and related proteins	KO:K05692	pfam00022
TCCM_0445.00000010	7138600	6793100	7812000	8234200	18207000	28951000	5127600	2812100	7291900	7765700	6848600	9300800	10499000	10787000	5416700	6097300	4323500	6465900	4495500	2194700	2222400	5908300	11055000	6234000	4990900	6696700	4753400	6851600	9575800	2543900	2498300	4582300	2559100	3472100	2264800	4358700	4684600	Bacteria;Cyanobacteria;unclassified;Oscillatoriales;unclassified;Trichodesmium;erythraeum;Trichodesmium erythraeum IMS101	glycogen/starch synthases, ADP-glucose type	KO:K00703	pfam08323
TCCM_0660.00000010	15420000	11533000	16804000	16352000	20850000	34022000	5858500	2995100	7595700	8857400	32504000	29277000	9574300	8171400	8355200	13125000	8971300	21941000	6899200	4813900	6106200	15767000	18577000	29131000	17250000	14934000	9204800	19753000	20651000	2586000	3193700	11080000	15072000	11807000	3821100	11343000	10359000	Bacteria;Cyanobacteria;unclassified;Oscillatoriales;unclassified;Trichodesmium;erythraeum;Trichodesmium erythraeum IMS101	Peptidyl-prolyl cis-trans isomerase (rotamase) - cyclophilin family	KO:K01802	pfam00160
TCCM_0411.00000440	16835000	34526000	32421000	16553000	26874000	53682000	3155800	4365900	0	0	24724000	10310000	12001000	13962000	21512000	7722000	3164400	35167000	19479000	21281000	3111900	34520000	36562000	54794000	21440000	23701000	11475000	27156000	29208000	3927200	12170000	34062000	30928000	40153000	0	1144500	0	Bacteria;Cyanobacteria;unclassified;Oscillatoriales;unclassified;Trichodesmium;erythraeum;Trichodesmium erythraeum IMS101	Fructose/tagatose bisphosphate aldolase	KO:K01624	pfam01116
TCCM_0242.00000010	19913000	25192000	24061000	35172000	40279000	59940000	7276300	7758700	13906000	19451000	24908000	30017000	19222000	15416000	9227900	10088000	8849900	27997000	28233000	8544600	8678400	20384000	29625000	31216000	9266400	19340000	9318400	25642000	21485000	11836000	7589200	26614000	20227000	9760500	5413300	19616000	4108000	Bacteria;Cyanobacteria;unclassified;Oscillatoriales;unclassified;Trichodesmium;erythraeum;Trichodesmium erythraeum IMS101	Cna protein B-type domain.		pfam05738
TCCM_0669.00000650	0	43693000	36193000	27440000	28365000	81825000	13730000	0	73754000	90929000	0	0	7008000	7719600	9840600	57199000	46145000	59321000	17806000	0	0	2364400	0	6340400	0	1180100	650070	0	0	0	0	5884000	4637200	179620	0	0	0	Eukaryota;Nematoda;Chromadorea;Rhabditida;Rhabditidae;Caenorhabditis;elegans;Caenorhabditis elegans Bristol N2	Core histone H2A/H2B/H3/H4.		pfam00125
TCCM_0366.00000020	4268500	6159600	11419000	14102000	14699000	24154000	5918900	2117900	6121800	6081700	20452000	6403900	8412500	9579900	6172300	5182200	3499400	11443000	7525900	1805100	2173400	16258000	17106000	9944200	9522900	11086000	9713100	10588000	12536000	789710	2768800	13267000	6625500	11086000	753580	2080500	4571900	Bacteria;Cyanobacteria;unclassified;Oscillatoriales;unclassified;Trichodesmium;erythraeum;Trichodesmium erythraeum IMS101	ribose 5-phosphate isomerase	KO:K01807	pfam06026
TCCM_0747.00000030	19201000	18575000	36501000	26119000	14724000	23047000	4404800	3904900	7862400	6874800	16676000	14519000	10352000	9726700	22427000	9415400	6994100	9781000	9566400	4491800	2773900	19786000	32218000	17352000	9155000	24093000	13177000	8421800	15852000	5362100	3495000	18794000	6953900	8930500	5297400	10073000	6246200	Bacteria;Cyanobacteria;unclassified;Oscillatoriales;unclassified;Trichodesmium;erythraeum;Trichodesmium erythraeum IMS101	Predicted O-methyltransferase	KO:K00588	pfam01596
TCCM_0237.00000040	20045000	648780	3546600	3294800	39904000	46737000	8020900	5933100	10922000	8528600	29905000	26278000	13960000	14878000	6694000	12487000	8190200	33522000	9689800	4248700	5729700	11790000	25496000	26502000	15380000	16998000	7182300	14873000	14754000	1061400	2407300	10279000	11383000	11571000	3978700	10331000	2411800	Bacteria;Cyanobacteria;unclassified;Oscillatoriales;unclassified;Trichodesmium;erythraeum;Trichodesmium erythraeum IMS101	ribosomal protein S7, bacterial/organelle	KO:K02992	pfam00177
TCCM_0985.00000110	9954000	10399000	26381000	19682000	2713700	6977000	1906700	5614300	20883000	14695000	37576000	43206000	2414600	2931900	10885000	22919000	15636000	31896000	6034800	7500700	17887000	15432000	24024000	35971000	36344000	12743000	5596300	35409000	17262000	0	107630	26660000	59388000	26372000	0	1864300	0		Predicted xylanase/chitin deacetylase		pfam01522
TCCM_0792.00000020	6692600	21929000	27660000	21309000	22665000	39139000	5978100	5168200	13380000	11757000	3209600	5919100	8635900	13332000	15894000	9745300	7238600	18354000	9651000	1548100	1799300	15181000	24753000	7200200	3842200	14342000	9325500	5264900	8393700	3474500	2802000	15243000	4858200	3747400	3605500	8588700	7668500	Bacteria;Cyanobacteria;unclassified;Oscillatoriales;unclassified;Trichodesmium;erythraeum;Trichodesmium erythraeum IMS101	4-alpha-glucanotransferase	KO:K00705	pfam02446
TCCM_0570.00000130	14783000	22811000	18125000	21945000	20696000	37188000	6433200	4974900	8639500	10550000	20187000	19211000	9009700	12076000	6949000	9248800	8947800	15648000	11030000	3545900	5446600	15373000	19868000	18964000	15053000	12110000	7031200	11166000	12683000	2880300	3578800	12744000	13339000	12511000	2874700	10277000	3507100	Bacteria;Cyanobacteria;unclassified;Oscillatoriales;unclassified;Trichodesmium;erythraeum;Trichodesmium erythraeum IMS101	ABC-type amino acid transport/signal transduction systems, periplasmic component/domain	KO:K09969	pfam00497
TCCM_0082.00000230	28498000	32347000	20582000	30470000	29496000	35273000	10445000	6455600	11614000	11308000	15421000	15297000	12563000	17699000	23845000	10299000	9014200	15416000	8288300	5301200	5043700	16713000	34041000	16830000	16337000	19335000	11806000	11526000	11352000	2763300	8423300	17703000	9562600	7516000	3378000	1700800	4264300	Bacteria;Cyanobacteria;unclassified;Oscillatoriales;unclassified;Trichodesmium;erythraeum;Trichodesmium erythraeum IMS101	Tetratricopeptide repeat.		pfam13414
TCCM_0472.00000080	12761000	21486000	22306000	17459000	25061000	41477000	8243800	869700	8194400	9394400	20928000	11611000	14402000	19550000	14950000	11680000	5095300	18945000	4788100	3618200	4457300	8652900	7789000	20699000	19593000	7485200	4932900	14241000	15026000	658830	1366400	6995400	12015000	15014000	2886500	4977900	0	Bacteria;Cyanobacteria;unclassified;Oscillatoriales;unclassified;Trichodesmium;erythraeum;Trichodesmium erythraeum IMS101	Carbon dioxide concentrating mechanism/carboxysome shell protein	KO:K08696	pfam00936
TCCM_0709.00000020	13806000	18995000	0	0	17229000	39552000	6672000	6112600	10024000	7175800	58910000	21132000	15206000	20644000	11404000	16764000	10303000	30289000	13651000	11572000	11904000	15553000	18637000	55730000	39215000	12854000	7029200	26000000	35816000	976370	3204100	11839000	18801000	21277000	4162000	3053900	1974400	Bacteria;Cyanobacteria;unclassified;Oscillatoriales;unclassified;Trichodesmium;erythraeum;Trichodesmium erythraeum IMS101	ribosomal protein L7/L12	KO:K02935	pfam00542
TCCM_0270.00004100	13337000	6451600	11735000	23113000	7468000	24042000	3577100	11215000	24972000	13504000	48825000	57892000	16230000	11915000	4129300	34720000	26260000	71449000	37248000	9457800	11145000	49061000	92366000	72097000	32893000	110980000	49320000	4690200	11634000	0	9862900	59559000	27350000	18714000	0	42600000	0	Bacteria;Proteobacteria;Gammaproteobacteria;Enterobacteriales;Enterobacteriaceae;Citrobacter;rodentium;Citrobacter rodentium ICC168
TCCM_0250.00000190	32035000	13182000	27432000	32307000	14628000	35284000	6817400	5157300	13490000	13587000	24863000	42685000	27950000	23099000	17944000	18990000	11943000	24127000	11172000	6178600	7609900	15259000	22791000	37973000	19464000	15735000	11547000	17839000	18907000	2946600	3681900	16671000	9427200	10153000	2551100	7945100	24497000	Bacteria;Cyanobacteria;unclassified;Oscillatoriales;unclassified;Trichodesmium;erythraeum;Trichodesmium erythraeum IMS101	Bacterioferritin (cytochrome b1)	KO:K03594	pfam00210
TCCM_0299.00000520	36544000	0	0	68207000	27098000	58816000	17508000	13173000	11441000	17427000	10715000	19748000	22904000	16722000	28980000	18562000	10535000	19677000	60965000	5680500	8186900	92025000	152560000	23486000	17942000	96376000	56365000	19733000	23013000	3508600	22614000	75502000	22229000	27209000	4772100	33901000	16099000	Bacteria;Cyanobacteria;unclassified;Oscillatoriales;unclassified;Trichodesmium;erythraeum;Trichodesmium erythraeum IMS101
TCCM_0061.00000050	15467000	31697000	37505000	25621000	23460000	59187000	12302000	3668800	7849200	11224000	14045000	8394300	12074000	13182000	13308000	9573500	4554300	16132000	18464000	2141400	3354300	27920000	37699000	17475000	8625100	21709000	18929000	9552600	10056000	2276600	3019100	21325000	7557700	7543500	5117000	13602000	1876300	Bacteria;Cyanobacteria;unclassified;Oscillatoriales;unclassified;Trichodesmium;erythraeum;Trichodesmium erythraeum IMS101	50S ribosomal protein L4, bacterial/organelle	KO:K02926	pfam00573
TCCM_0486.00000020	5753100	5365300	11813000	10400000	10620000	15526000	2639100	2557700	3764900	4647700	6632100	5996400	3766100	6027500	4705500	3944000	2183200	5804900	3431100	1791700	2003600	5896100	10349000	8258900	4675200	5792200	4457200	5777400	8826700	551330	812910	5388300	5356600	3075500	2155500	5340300	3162900	Bacteria;Cyanobacteria;unclassified;Oscillatoriales;unclassified;Trichodesmium;erythraeum;Trichodesmium erythraeum IMS101	Bacterial surface proteins containing Ig-like domains		pfam07538
TCCM_0068.00000810	46019000	19203000	69619000	101490000	44217000	93582000	21633000	6516000	20592000	13847000	44320000	25569000	28773000	43960000	21028000	17003000	5806900	36270000	8169100	36895000	28680000	27674000	24209000	29779000	11141000	13417000	566800	2090400	4001500	0	0	22306000	30664000	20184000	0	0	0	Bacteria;Cyanobacteria;unclassified;Oscillatoriales;unclassified;Trichodesmium;erythraeum;Trichodesmium erythraeum IMS101
TCCM_0244.00000350	6042000	8672600	7536200	8961700	8139800	13117000	2718700	4576700	7457600	5943200	23069000	12842000	5212200	5284600	5591900	14241000	9085400	19218000	13961000	2708500	3930800	19499000	30868000	25125000	14040000	21299000	14221000	15519000	11090000	1368200	2700900	34930000	16514000	8915500	316200	1511000	12289000	Bacteria;Cyanobacteria;unclassified;Chroococcales;unclassified;Cyanothece;sp.;Cyanothece sp. PCC 7822	CVNH domain.		pfam08881
TCCM_0061.00000040	7616000	8201400	11112000	10436000	31482000	41303000	6030600	3053200	7273600	11202000	17774000	12574000	10226000	11342000	8584500	11156000	8787100	20155000	5824600	3952100	4072100	8799300	13087000	14492000	12500000	7894300	4768400	12071000	9745600	1469100	1694900	7707700	5029400	8071600	1014700	5304100	1792900	Bacteria;Cyanobacteria;unclassified;Oscillatoriales;unclassified;Trichodesmium;erythraeum;Trichodesmium erythraeum IMS101	50S ribosomal protein L3, bacterial	KO:K02906	pfam00297
TCCM_0751.00000490	37850000	0	87348000	84934000	37752000	45884000	17656000	14021000	13482000	21331000	10715000	19748000	17034000	15777000	41362000	18608000	18738000	32229000	64518000	5680500	8186900	95372000	147130000	23486000	17942000	95882000	59559000	19733000	23013000	3925300	18568000	75174000	22229000	27209000	6966700	32996000	0	Bacteria;Cyanobacteria;unclassified;Oscillatoriales;unclassified;Trichodesmium;erythraeum;Trichodesmium erythraeum IMS101
TCCM_0002.00000040	4898800	7095500	7675500	14314000	11578000	20099000	2924700	1510600	4093900	2972200	8101900	8694400	4986900	5262100	7060800	4065200	4332300	7383300	1621100	1531400	1936500	3400000	8062800	5503800	4822700	3484300	3364600	5836800	5955400	856680	1076800	4647400	4737800	3763500	1846200	3648700	3280100	Bacteria;Cyanobacteria;unclassified;Oscillatoriales;unclassified;Trichodesmium;erythraeum;Trichodesmium erythraeum IMS101	3-isopropylmalate dehydrogenase	KO:K00052	pfam00180
TCCM_0342.00000030	8034300	8107300	12804000	11569000	16459000	23583000	3849500	3058000	7704200	6686300	5241000	6155600	5970300	7025000	5988600	5929100	3672900	9533800	3896400	1948900	1939700	7325400	12206000	6563900	3659800	7586900	5324300	6281900	6963300	1949300	1770800	7451100	3345500	1340200	2304100	8574300	5448000	Bacteria;Cyanobacteria;unclassified;Oscillatoriales;unclassified;Trichodesmium;erythraeum;Trichodesmium erythraeum IMS101	opcA protein		pfam10128
TCCM_0333.00000010	12565000	15716000	22143000	21376000	30730000	43776000	5620400	1439500	5111800	6667500	19983000	23551000	14783000	14021000	9160000	7152800	5679900	11678000	4337200	4725800	5530800	10730000	10621000	31686000	18478000	8858000	7448400	14885000	17783000	1263100	861300	8121300	20027000	10063000	1937900	4632200	601760	Bacteria;Cyanobacteria;unclassified;Oscillatoriales;unclassified;Trichodesmium;erythraeum;Trichodesmium erythraeum IMS101	photosystem II protein Psb27	KO:K08902	pfam13326
TCCM_0043.00000390	5819300	7365200	3704000	3524200	8921100	14237000	2807700	5524800	9079400	7553700	9893500	8699900	3384300	3056000	3292600	14439000	8847400	13225000	10237000	1968300	6418900	14365000	18480000	15949000	6125500	11040000	8600200	2506000	4334400	5226700	5215600	18012000	13498000	7353800	0	0	6966700	Bacteria;Cyanobacteria;unclassified;Nostocales;Nostocaceae;Anabaena;variabilis;Anabaena variabilis ATCC 29413	Photosystem I reaction centre subunit IV / PsaE.	KO:K02693	pfam02427
TCCM_0272.00000320	15953000	20684000	24783000	22671000	24170000	47036000	5915900	4355400	10351000	7386300	15936000	16466000	12192000	13653000	11338000	11108000	6702600	14364000	11470000	3036500	5353000	17251000	26907000	28920000	8854200	16498000	11996000	9780900	9747500	4219200	2970100	17500000	11864000	6397200	2500100	9516000	7266400	Bacteria;Cyanobacteria;unclassified;Oscillatoriales;unclassified;Trichodesmium;erythraeum;Trichodesmium erythraeum IMS101	photosystem II protein PsbQ
TCCM_0478.00000240	4644500	7266500	12953000	7079700	5724900	11562000	1989600	1371600	1465100	1109300	6085200	3732700	5496500	3647000	4396200	3134100	1907800	3317600	2861600	1438200	1247100	6714800	8670400	5106900	4421300	4587300	4214300	5068500	5224200	1041800	647920	4116400	3101600	3809400	846120	2387900	1490200	Bacteria;Cyanobacteria;unclassified;Oscillatoriales;unclassified;Trichodesmium;erythraeum;Trichodesmium erythraeum IMS101	Predicted ATPase of the ABC class		pfam09818
TCCM_0219.00000010	3731800	2794400	5903400	7190000	7881300	9375300	2146200	758140	1848100	2701600	3231900	3578200	3144500	5480800	3530300	3507900	1479400	3422900	1833100	876390	472080	3500500	4776800	3002600	2104400	3712900	2600900	2528300	3772700	669650	823590	2694300	758400	1042800	1531500	3283200	2183500	Bacteria;Cyanobacteria;unclassified;Oscillatoriales;unclassified;Trichodesmium;erythraeum;Trichodesmium erythraeum IMS101	translation initiation factor IF-2	KO:K02519	pfam00009
TCCM_0791.00000110	110400000	105100000	147340000	165170000	130560000	219400000	48933000	46603000	82265000	95339000	131390000	85105000	81570000	78426000	149290000	60456000	54042000	99155000	49654000	17965000	21952000	124340000	105150000	89829000	57102000	118370000	74366000	83615000	63827000	27109000	16011000	78608000	49166000	82360000	20197000	36405000	0	Bacteria;Cyanobacteria;unclassified;Oscillatoriales;unclassified;Trichodesmium;erythraeum;Trichodesmium erythraeum IMS101	S-adenosylhomocysteine hydrolase	KO:K01251	pfam05221
TCCM_0360.00000320	0	0	0	0	44811000	45197000	8362200	1126200	1058300	14437000	0	0	62793000	90271000	0	17908000	7825500	12909000	3255700	0	0	704000	8657000	553440	269850	2653000	9419500	1477900	0	4885900	36856000	0	160440	64181	0	0	0	Bacteria;Cyanobacteria;unclassified;Chroococcales;unclassified;Acaryochloris;marina;Acaryochloris marina MBIC11017
TCCM_0962.00000320	80212000	68562000	72104000	57489000	78036000	157540000	21617000	16527000	34727000	36012000	57034000	80881000	45941000	53654000	48443000	33151000	27563000	56684000	30336000	19215000	11641000	62320000	80772000	89198000	51531000	54113000	37594000	63375000	76302000	14457000	39082000	45558000	28895000	24533000	4312800	16283000	18985000	Bacteria;Cyanobacteria;unclassified;Oscillatoriales;unclassified;Trichodesmium;erythraeum;Trichodesmium erythraeum IMS101	Glyceraldehyde-3-phosphate dehydrogenase/erythrose-4-phosphate dehydrogenase	KO:K00150	pfam02800
TCCM_0907.00000010	11215000	6494900	9034800	9948200	4288700	7402600	1769300	300920	506600	1277400	9060000	9068400	5589500	5987300	5436700	3292900	2257100	6520300	5837500	1783400	3016100	5110900	11045000	7880300	7556700	6962900	4144500	9076500	7371300	89623	922410	5122800	5694900	3040600	1055900	8495100	0	Bacteria;Cyanobacteria;unclassified;Oscillatoriales;unclassified;Trichodesmium;erythraeum;Trichodesmium erythraeum IMS101	RTX toxins and related Ca2+-binding proteins		pfam14252
TCCM_0154.00000050	4740300	4236300	5102700	3294300	13674000	16613000	1929900	783140	4120000	3744800	11444000	8588800	5016100	7459700	4308000	6621700	4740200	3891900	3181500	2482400	3286700	3474200	4469600	8531100	7491300	2565600	1282300	8861500	10083000	112260	124070	3809800	6508100	4919700	1554600	4850500	3158500	Bacteria;Cyanobacteria;unclassified;Oscillatoriales;unclassified;Trichodesmium;erythraeum;Trichodesmium erythraeum IMS101	ribosomal protein L19, bacterial type	KO:K02884	pfam01245
TCCM_0899.00000030	3515400	2631700	5480400	3195500	5296000	8944000	1194500	812220	2319200	914320	9829700	11247000	6851600	5383000	956940	5873100	3169100	8569200	2482100	2144100	2030100	8832200	13085000	10647000	7960800	6589200	6064100	9035000	12236000	365990	629870	6467900	5675500	5997100	1020700	5574100	129410	Bacteria;Cyanobacteria;unclassified;Chroococcales;unclassified;Cyanothece;sp.;Cyanothece sp. PCC 7425	Acyl carrier protein		pfam00550
TCCM_0877.00000030	56668000	42101000	45412000	41413000	42293000	59548000	11441000	9850400	12418000	22687000	29531000	16763000	29553000	41056000	37492000	18946000	14694000	28853000	14873000	5468900	6602300	29471000	34036000	33176000	13451000	24811000	26065000	27836000	34666000	6462400	10474000	28130000	23158000	13242000	2828700	6185500	14141000	Bacteria;Cyanobacteria;unclassified;Oscillatoriales;unclassified;Trichodesmium;erythraeum;Trichodesmium erythraeum IMS101	3-phosphoglycerate kinase	KO:K00927	pfam00162
TCCM_0340.00000100	17346000	5272200	11242000	13290000	13092000	21513000	3900200	3587500	6425400	8240000	21180000	20946000	6015800	6496600	7629600	10080000	9354500	19681000	10649000	3351900	4941100	17454000	17896000	25628000	18099000	13993000	10144000	15491000	13783000	2874700	3170400	20061000	15594000	9319400	2605100	8747700	7043100	Bacteria;Cyanobacteria;unclassified;Oscillatoriales;unclassified;Trichodesmium;erythraeum;Trichodesmium erythraeum IMS101	Protein-disulfide isomerase		pfam13462
TCCM_0654.00000060	19949000	20917000	27129000	21876000	17303000	33179000	6324300	4540500	9855700	10503000	7308200	8492000	10017000	17017000	14988000	10961000	8913400	21752000	8247100	2976000	3774500	9687800	13305000	5545200	4112700	11173000	7482000	8247000	9380300	2673800	4028300	9248600	2580200	5938100	2805200	10211000	7380100	Bacteria;Cyanobacteria;unclassified;Oscillatoriales;unclassified;Trichodesmium;erythraeum;Trichodesmium erythraeum IMS101	Fructose-1,6-bisphosphatase	KO:K03841	pfam00316
TCCM_0162.00000450	6266500	9100200	20815000	26987000	8934300	19999000	3162200	2798400	4523200	6794200	24740000	28687000	7965800	11862000	2702700	18470000	14882000	36380000	14575000	7183700	7101200	31217000	34943000	31677000	18551000	14514000	19423000	19393000	23942000	0	1523300	20250000	19277000	18250000	0	0	0	Bacteria;Cyanobacteria;unclassified;Oscillatoriales;unclassified;Trichodesmium;erythraeum;Trichodesmium erythraeum IMS101	Nitroreductase		pfam00881
TCCM_0553.00000140	8666100	17570000	19401000	20893000	15375000	24572000	4620800	4225900	9752000	8688700	14470000	14227000	9796800	12720000	14017000	8759800	6268200	17317000	7746600	2707400	2650600	15374000	20839000	10472000	8184300	13121000	9671700	9405700	12128000	2419500	1696800	11350000	4372900	4511500	4819000	8674900	12239000	Bacteria;Cyanobacteria;unclassified;Oscillatoriales;unclassified;Trichodesmium;erythraeum;Trichodesmium erythraeum IMS101			pfam12784
TCCM_0295.00000020	11662000	11132000	13101000	14120000	12215000	20117000	4203500	2456200	4447000	6141200	8735500	8137600	6714600	5442000	10086000	5676100	4958200	8888900	3838400	1697400	1784800	5435000	10656000	7233900	5572200	7727000	4623600	6631700	7745000	1424800	771040	5617200	3368100	4261500	1277800	3569200	1969500	Bacteria;Cyanobacteria;unclassified;Oscillatoriales;unclassified;Trichodesmium;erythraeum;Trichodesmium erythraeum IMS101	Leucyl aminopeptidase	KO:K01255	pfam00883
TCCM_0123.00001200	0	3160700	31206000	30620000	14558000	25051000	4365400	7133400	27282000	32927000	2262600	1763400	12898000	15007000	897840	54145000	43927000	117640000	36789000	28562000	35472000	33768000	151980000	123440000	61393000	71035000	54742000	20092000	31074000	1118200	4218000	63835000	53512000	2453200	19148000	648210	0	Bacteria;Proteobacteria;Gammaproteobacteria;Enterobacteriales;Enterobacteriaceae;Xenorhabdus;bovienii;Xenorhabdus bovienii SS-2004	Chitinase		pfam00704
TCCM_0615.00000030	19325000	21345000	30712000	31097000	27851000	40511000	3813800	4217800	15110000	8903100	14091000	12979000	8118000	10560000	16190000	12106000	11861000	20724000	6906300	2203800	6596700	15549000	18725000	19766000	13183000	20739000	12105000	21361000	22192000	4755600	4423100	15596000	5980400	12968000	1616700	2907800	8033400	Bacteria;Cyanobacteria;unclassified;Oscillatoriales;unclassified;Trichodesmium;erythraeum;Trichodesmium erythraeum IMS101	translation elongation factor Ts/translation elongation factor Ts		pfam00889
TCCM_0371.00000170	21694000	40000000	23135000	21553000	69817000	102420000	20747000	14030000	38434000	39354000	61008000	31676000	23220000	28252000	11689000	41569000	30099000	52826000	44857000	9298500	6245700	48052000	39165000	19895000	15137000	29815000	24907000	20384000	32814000	12282000	16933000	52167000	21666000	10395000	5057600	11451000	7128400	Bacteria;Cyanobacteria;unclassified;Oscillatoriales;unclassified;Trichodesmium;erythraeum;Trichodesmium erythraeum IMS101	photosystem I core protein PsaA	KO:K02689	pfam00223
TCCM_0453.00003720	37966000	0	0	0	99251000	61557000	21749000	0	22325000	32146000	80331000	92490000	34160000	33519000	26555000	0	0	0	50821000	21765000	23089000	44740000	58373000	80749000	63586000	41600000	26322000	59532000	51534000	0	0	41040000	59566000	34527000	0	0	0	Bacteria;Cyanobacteria;unclassified;Oscillatoriales;unclassified;Trichodesmium;erythraeum;Trichodesmium erythraeum IMS101
TCCM_0223.00000010	6791900	7062600	8648100	8796700	10811000	19189000	4132800	2785400	5315300	5390700	6912600	8046400	6265800	6569700	3854000	4330100	4048200	8077000	2768800	1592000	1830900	4461400	9442500	8219200	4234900	5313600	3769300	5997900	5042100	697230	935400	3688500	3731900	3509200	1184900	2658200	3224900	Bacteria;Cyanobacteria;unclassified;Oscillatoriales;unclassified;Microcoleus;chthonoplastes;Microcoleus chthonoplastes PCC 7420	IMP dehydrogenase family protein	KO:K00088	pfam00478
TCCM_0612.00000020	3278600	9753500	9064900	5717500	10254000	14621000	2699400	2076800	3223600	3437000	4205800	2755300	3537100	9660200	3933100	4355700	2773000	4748700	3041500	1006300	940740	4494600	7351200	4823900	1824700	3835900	3090500	4443800	4068800	952090	772940	3157400	2716000	2681300	813210	2831300	1442800	Bacteria;Cyanobacteria;unclassified;Oscillatoriales;unclassified;Trichodesmium;erythraeum;Trichodesmium erythraeum IMS101	DNA-directed RNA polymerase, beta subunit	KO:K03043	pfam00562
TCCM_0326.00000010	5155800	6016100	6334300	5523400	8922900	13685000	2168100	881300	2833900	2804000	8583900	6207500	3258900	4165900	3035100	3318200	2154300	6351000	1716400	896180	1581200	4199700	8069300	5551700	4186400	3590600	3490600	5027900	4008600	980190	852560	3162900	2678600	3536400	1317300	2113500	2188700	Bacteria;Cyanobacteria;unclassified;Oscillatoriales;unclassified;Trichodesmium;erythraeum;Trichodesmium erythraeum IMS101	nucleotide sugar dehydrogenase	KO:K00012	pfam03721
TCCM_0070.00000040	1907400	4326900	5395200	3462500	7339700	10360000	1789300	1203400	2952700	3273300	3719500	3344300	2729400	3301800	1907400	2634700	1779200	3479200	1657500	559180	625750	2652700	5531600	2428600	2093900	2755000	1697500	2607800	2745000	1249900	806320	1651000	1245200	1086700	923550	1583000	940420	Bacteria;Cyanobacteria;unclassified;Oscillatoriales;unclassified;Trichodesmium;erythraeum;Trichodesmium erythraeum IMS101	isoleucyl-tRNA synthetase	KO:K01870	pfam00133
TCCM_0952.00000010	11601000	17301000	14059000	12990000	19717000	29460000	5975000	3561100	9128700	6133400	10213000	10691000	16870000	18387000	4036900	4552800	5012800	10803000	4813200	1337400	1291100	9279000	13771000	7421700	3561900	8495800	5822500	7424400	7420500	4130500	1598000	9444900	5955800	6750900	4832100	15896000	22837000	Bacteria;Cyanobacteria;unclassified;Oscillatoriales;unclassified;Trichodesmium;erythraeum;Trichodesmium erythraeum IMS101	Peroxiredoxin	KO:K03564	pfam00578
TCCM_0792.00003520	59978000	71320000	126880000	164930000	128730000	211050000	32959000	33247000	55272000	61849000	92432000	92319000	33602000	44683000	61518000	89066000	68078000	162300000	74877000	11421000	28879000	105830000	207490000	140880000	40858000	100760000	74489000	27887000	115520000	12745000	53247000	96079000	50130000	29477000	15593000	109240000	35910000	Bacteria;Cyanobacteria;unclassified;Oscillatoriales;unclassified;Trichodesmium;erythraeum;Trichodesmium erythraeum IMS101
TCCM_0246.00000190	16929000	13233000	17418000	13379000	39151000	49392000	9078100	3149800	13883000	9631800	26028000	14462000	17830000	14951000	10890000	12856000	7440700	16261000	6841700	5334900	5286600	11975000	21096000	13892000	12110000	14765000	10413000	16318000	18556000	3328500	6969200	10637000	7402100	10772000	3150900	7248800	4950400	Bacteria;Cyanobacteria;unclassified;Oscillatoriales;unclassified;Trichodesmium;erythraeum;Trichodesmium erythraeum IMS101	ketol-acid reductoisomerase	KO:K00053	pfam01450
TCCM_0440.00000120	32349000	28251000	10287000	24245000	20935000	26191000	5554700	7033200	12825000	16355000	11802000	12668000	8407200	8890200	10966000	9861000	11825000	28954000	8762200	3385100	4410300	8487400	17664000	6086800	6736600	11202000	7569500	10973000	9682400	4293300	4206500	12912000	8261200	10013000	493660	1311500	839240	Bacteria;Cyanobacteria;unclassified;Oscillatoriales;unclassified;Trichodesmium;erythraeum;Trichodesmium erythraeum IMS101	ribulose-phosphate 3-epimerase	KO:K01783	pfam00834
TCCM_0689.00000030	2805100	2597800	3783000	4299600	6364700	9244000	1635900	2320800	5351100	6100100	10709000	8426000	1358500	1736900	968840	6019000	4680800	13526000	3051700	1822300	1838800	4830600	17509000	9751400	6576600	10925000	4498000	6313100	8006100	0	2142700	5307000	4321500	3712700	0	1201600	0	Bacteria;Cyanobacteria;unclassified;Oscillatoriales;unclassified;Trichodesmium;erythraeum;Trichodesmium erythraeum IMS101	Alpha-glucosidases, family 31 of glycosyl hydrolases	KO:K01187	pfam01055
TCCM_0488.00000040	7404500	8899700	10920000	12633000	8907500	20658000	3839900	1292100	6130300	6335900	8672500	5556300	5223600	6527400	5336500	6457100	4668300	9166900	4295600	1550900	1817200	7643100	10975000	7531800	5305200	6240500	5336800	5848900	7499200	920880	1743200	6670700	5228200	4812700	1522400	5073800	2299000	Bacteria;Cyanobacteria;unclassified;Oscillatoriales;unclassified;Trichodesmium;erythraeum;Trichodesmium erythraeum IMS101	asparaginyl-tRNA synthetase	KO:K01893	pfam00152
TCCM_0044.00000030	6292600	19728000	31793000	22881000	43249000	62223000	5746400	3385100	9326100	10062000	24063000	20641000	16205000	22196000	14495000	7398300	8707200	12819000	6995000	3805800	4883400	10115000	24986000	20393000	11914000	13383000	8186500	14588000	17837000	2701400	5248500	9356500	6193100	8607000	5541200	10674000	12814000	Bacteria;Cyanobacteria;unclassified;Oscillatoriales;unclassified;Trichodesmium;erythraeum;Trichodesmium erythraeum IMS101	ATPases of the AAA+ class	KO:K13525	pfam00004
TCCM_0026.00000290	7235500	6489700	7879000	5995400	13690000	20410000	4502400	1886000	7606000	5077500	4527800	3741400	6316200	8046500	6242400	5259700	2802800	6857700	2853100	1133800	1091500	5095700	10856000	5766600	3966300	6130700	5058000	3105600	6054200	1993800	1859000	5049100	1318300	2111000	2898900	6003300	3927800	Bacteria;Cyanobacteria;unclassified;Oscillatoriales;unclassified;Trichodesmium;erythraeum;Trichodesmium erythraeum IMS101	ribonuclease, Rne/Rng family	KO:K08300	pfam10150
TCCM_0761.00000120	7982900	10370000	9309000	11896000	7254300	13353000	2412500	1759400	2852900	3710900	6675700	9568000	5975300	3516000	4761900	6440300	3733700	8757900	3691700	1917100	2771700	6359900	11076000	14170000	7591900	5936700	4677400	10047000	9608500	565790	2054700	5633400	5016800	5120300	450680	1524600	2492200	Bacteria;Cyanobacteria;unclassified;Oscillatoriales;unclassified;Trichodesmium;erythraeum;Trichodesmium erythraeum IMS101	Thiamine pyrophosphate-requiring enzymes [acetolactate synthase, pyruvate dehydrogenase (cytochrome), glyoxylate carboligase, phosphonopyruvate decarboxylase]	KO:K01652	pfam02776
TCCM_0116.00000060	8577200	10711000	12375000	17958000	19683000	24689000	4863900	3701400	10405000	9814300	718790	963550	7512700	8881500	5665900	9945200	7425900	13101000	5047800	1823500	1967100	6264000	9819700	9203600	1679500	7653100	3888000	2595300	7103900	1053500	1261500	7443800	5753100	1115600	1143100	7068000	7982100	Bacteria;Cyanobacteria;unclassified;Oscillatoriales;unclassified;Trichodesmium;erythraeum;Trichodesmium erythraeum IMS101
TCCM_0801.00000020	1811200	3486600	4958500	4201400	7622900	13855000	1814200	1710600	2627000	4225100	12223000	16369000	3772500	2256200	2883000	6193400	4707800	12205000	8029800	3229400	3101700	12440000	19885000	17040000	11391000	11550000	9346700	8997300	15338000	602470	1506500	8538300	6691000	8504600	0	0	0	Bacteria;Cyanobacteria;unclassified;Nostocales;Nostocaceae;Raphidiopsis;brookii;Raphidiopsis brookii D9			pfam09118
TCCM_0040.00000030	4242500	13947000	9840200	10756000	7307500	17580000	2778400	1848400	2943000	3772900	9633100	13473000	3274400	12017000	2779700	4986400	4211400	6332200	2535600	2987400	2086400	4530100	6823400	15467000	9366000	5180800	3165200	9082400	8936200	3030300	1075200	4698700	7537600	7338000	1476500	4587700	2101000	Bacteria;Cyanobacteria;unclassified;Oscillatoriales;unclassified;Trichodesmium;erythraeum;Trichodesmium erythraeum IMS101
TCCM_0614.00000010	576190	3075400	30470000	28099000	51328000	63937000	11309000	2921000	10480000	7204800	14673000	11364000	36761000	45087000	13804000	3806800	853150	4760600	3874700	4569600	2507500	11443000	18755000	22168000	16874000	15529000	10882000	23057000	38986000	517230	93579	2687200	753020	982890	3350900	4642200	266690	Bacteria;Cyanobacteria;unclassified;Oscillatoriales;unclassified;Trichodesmium;erythraeum;Trichodesmium erythraeum IMS101	chlorophyll a/b binding light-harvesting protein		pfam00421
TCCM_0234.00000160	644920	1762600	4807500	2693700	5384800	7642600	1725600	640280	2081400	1960900	3505400	6878600	2791800	2576900	2594500	6471000	2880900	4358500	3355600	1945400	1199800	6665000	9302100	8126200	4293200	7597000	6415600	5540700	5819000	225270	625080	7797900	2740600	2413000	1298000	2866900	1896500	Bacteria;Cyanobacteria;unclassified;Oscillatoriales;unclassified;Trichodesmium;erythraeum;Trichodesmium erythraeum IMS101			pfam12784
TCCM_0494.00000070	8154100	5390000	7306900	3914800	14246000	18820000	3431700	0	2815500	463580	8845900	12680000	4746300	5732800	6832700	2585000	3141500	5658700	5789700	2133000	2768900	14745000	23251000	7523600	4437100	14031000	4070900	4947600	7231400	5149400	6475100	8454200	5666100	5656400	722870	1615700	183260	Bacteria;Cyanobacteria;unclassified;Oscillatoriales;unclassified;Trichodesmium;erythraeum;Trichodesmium erythraeum IMS101	Ribosomal protein L5	KO:K02931	pfam00673
TCCM_0614.00000060	11235000	8448700	24269000	30305000	23115000	35416000	6669100	3128600	9377000	9659200	12830000	21447000	11627000	19314000	9663600	8650100	7620900	15818000	3364800	5719100	7162200	7792800	7816800	21701000	16300000	4366800	7999000	14465000	19608000	1310600	1477200	6714100	11794000	11243000	1126000	8309200	5177600	Bacteria;Cyanobacteria;unclassified;Oscillatoriales;unclassified;Trichodesmium;erythraeum;Trichodesmium erythraeum IMS101	Protease subunit of ATP-dependent Clp proteases	KO:K01358	pfam00574
TCCM_0621.00000010	6544500	9593500	4499100	6588200	4581900	7913500	1156400	1593500	2017300	2857400	3371600	3848800	2919000	1886900	2154100	4633700	2586000	5716300	3109300	1008000	1087300	4711600	7710400	2948400	2159900	3635700	3089900	2170200	2920500	1306500	513000	5073900	1831000	1887900	431250	1016900	1072600	Bacteria;Cyanobacteria;unclassified;Oscillatoriales;unclassified;Trichodesmium;erythraeum;Trichodesmium erythraeum IMS101	aconitate hydratase 2	KO:K01682	pfam06434
TCCM_0462.00000520	0	3653700	4340800	4760200	47014000	37375000	3683800	10688000	24639000	25273000	402470000	175820000	111990000	178320000	404040	33651000	87247000	268050000	41880000	43872000	13739000	78969000	158730000	303430000	203720000	103010000	57846000	207410000	155680000	17421000	9322000	81456000	71839000	60499000	0	0	721010	Bacteria;Cyanobacteria;unclassified;Oscillatoriales;unclassified;Trichodesmium;erythraeum;Trichodesmium erythraeum IMS101
TCCM_0183.00000250	0	0	1079900	1944600	0	398100	61305	0	0	0	11714000	7118200	0	0	1024700	8086800	2871200	12453000	8561000	832050	587160	17739000	9684700	7367100	4874300	18534000	10692000	21168000	12704000	0	58675	21862000	8265300	3922400	0	0	0		Ribosome inactivating protein.		pfam00161
TCCM_0403.00000020	7512600	7336600	14114000	10231000	14225000	21146000	5978000	2077300	5124900	2801900	10729000	10539000	9785600	10590000	7109100	3516400	2950200	6687200	3456100	1244400	1460500	4630900	7091000	7932600	6909300	5470600	3944800	7801100	10879000	1875600	2055500	4486000	3749800	5590700	992570	2887500	3645500	Bacteria;Cyanobacteria;unclassified;Oscillatoriales;unclassified;Trichodesmium;erythraeum;Trichodesmium erythraeum IMS101	alpha-1,4-glucan:alpha-1,4-glucan 6-glycosyltransferase	KO:K00700	pfam02922
TCCM_0081.00000240	7110000	7237700	10141000	12536000	11013000	17027000	3387200	2813000	7036600	7121400	8871900	7820100	5215700	6266500	5150300	5089400	4422200	7255500	3476200	2293800	2144700	5638300	8884800	7959200	6065200	5462000	3334200	5446700	5478600	1039700	1272100	4669600	4380600	4207900	1346900	2595600	5060300	Bacteria;Cyanobacteria;unclassified;Oscillatoriales;unclassified;Trichodesmium;erythraeum;Trichodesmium erythraeum IMS101	phosphoribosylaminoimidazolecarboxamide formyltransferase/IMP cyclohydrolase	KO:K00602	pfam01808
TCCM_0154.00000010	16177000	15341000	23498000	26686000	33440000	49328000	5212400	3665100	9884000	7297200	9249400	9719300	10724000	9542000	9158000	10803000	7496000	22281000	9320600	2890800	3318200	10563000	21457000	21455000	9513200	13788000	8274100	14784000	11439000	3003600	1824300	11123000	8752600	4657300	2502800	6054200	6776100	Bacteria;Cyanobacteria;unclassified;Oscillatoriales;unclassified;Trichodesmium;erythraeum;Trichodesmium erythraeum IMS101	ribosomal protein L1, bacterial/chloroplast	KO:K02863	pfam00687
TCCM_0229.00000020	17268000	2862400	1001500	0	15321000	40358000	6837500	4064700	14680000	10480000	30478000	25257000	2667900	1852800	2984900	13946000	11422000	41435000	16690000	5358300	6541700	9600500	11056000	15444000	10361000	8747900	4893900	10576000	8973300	1752800	2584700	24799000	34489000	33865000	0	165860	7317200	Bacteria;Cyanobacteria;unclassified;Oscillatoriales;unclassified;Trichodesmium;erythraeum;Trichodesmium erythraeum IMS101	DNA-binding ferritin-like protein (oxidative damage protectant)		pfam00210
TCCM_0853.00000160	6593300	7192000	7542100	16118000	15618000	22216000	4268000	2686400	6296400	7735200	10035000	10053000	5777300	6502100	4714800	5633900	4478200	12344000	3709100	2290800	2926900	7749300	9970400	12316000	6184500	7172600	5237500	11355000	12473000	1467700	2192900	7109400	7167600	7736900	0	201050	8655100	Bacteria;Cyanobacteria;unclassified;Oscillatoriales;unclassified;Trichodesmium;erythraeum;Trichodesmium erythraeum IMS101	cysteine synthase A	KO:K01738	pfam00291
TCCM_0473.00000020	13234000	10448000	21112000	17864000	18149000	33756000	6112200	3868200	7926700	6851700	10051000	8146000	9735800	9607100	8145800	8519500	6234300	15243000	4642100	3630800	3670600	10476000	19056000	15813000	7983600	9175200	8157400	12487000	13460000	4330100	3540300	8533900	6821100	1208200	3352200	6541000	9783500	Bacteria;Cyanobacteria;unclassified;Oscillatoriales;unclassified;Trichodesmium;erythraeum;Trichodesmium erythraeum IMS101	Pyruvate/2-oxoglutarate dehydrogenase complex, dehydrogenase (E1) component, eukaryotic type, beta subunit	KO:K00162	pfam02779
TCCM_0097.00000020	5968800	7334700	8601700	9636000	12067000	19125000	3417400	2326000	4827800	4176700	26855000	15132000	11888000	9915900	4871300	6352800	5799200	5522100	6525700	3232600	5020000	7749300	12329000	26157000	14598000	8120400	6428700	20194000	21860000	498750	1117600	8620000	5679600	4129400	2951700	9315200	4872800	Bacteria;Cyanobacteria;unclassified;Oscillatoriales;unclassified;Trichodesmium;erythraeum;Trichodesmium erythraeum IMS101	allophycocyanin, beta subunit	KO:K02097	pfam00502
TCCM_0494.00000020	25872000	22030000	39969000	25478000	38048000	73897000	9217500	6143500	11426000	16025000	35969000	32033000	13863000	21020000	15877000	19235000	12612000	36805000	7439300	6000300	6866000	15346000	20698000	33556000	19827000	12598000	9620300	22213000	24271000	2650600	2450100	13022000	16708000	15397000	2276000	4671900	4987900	Bacteria;Cyanobacteria;unclassified;Oscillatoriales;unclassified;Trichodesmium;erythraeum;Trichodesmium erythraeum IMS101	ribosomal protein L15, bacterial/organelle	KO:K02876	pfam00828
TCCM_0046.00000280	6112300	10393000	11990000	11097000	11732000	22389000	4437700	1485200	3746300	4264800	15671000	14838000	4782800	6167700	5073400	7658500	4458400	12909000	4226100	2330800	3299400	4730700	7551800	13278000	8779200	7098800	4791300	7514500	9541000	1601700	1106000	5523700	8332200	8520600	2232100	6549100	6215100	Bacteria;Cyanobacteria;unclassified;Oscillatoriales;unclassified;Trichodesmium;erythraeum;Trichodesmium erythraeum IMS101	Uncharacterized proteins involved in stress response, homologs of TerZ and putative cAMP-binding protein CABP1		pfam02342
TCCM_0179.00000050	11685000	6988000	6755100	8726900	5808600	11447000	2005600	2138400	5393800	5033300	10461000	6217400	1878100	4340100	6487900	4686600	3127800	7802200	4308200	1508600	2283600	8095600	9743700	7078500	5170600	8363700	3303500	7254200	4779200	1613500	663460	10806000	5149600	3624400	1049200	5688300	4986000	Bacteria;Proteobacteria;Alphaproteobacteria;Rhodospirillales;Rhodospirillaceae;Rhodocista;centenaria;Rhodocista centenaria SW	Dienelactone hydrolase and related enzymes	KO:K01061	pfam01738
TCCM_0017.00000130	18881000	1997700	11380000	8699200	29968000	53761000	7084200	3907800	8188100	5834300	17623000	19730000	12257000	17711000	4741600	11164000	7028000	21337000	7352100	3891800	5761500	11492000	21239000	27174000	13118000	14184000	8372600	16736000	14034000	2759000	3998000	10285000	9626200	8908600	1760900	4272600	1816100	Bacteria;Cyanobacteria;unclassified;Oscillatoriales;unclassified;Trichodesmium;erythraeum;Trichodesmium erythraeum IMS101	30S ribosomal protein S11	KO:K02948	pfam00411
TCCM_0589.00000140	4428700	6534800	8309800	7232100	11609000	15982000	2742100	2315000	5263900	5563000	7327100	6613500	4366900	5489200	4498500	3345700	2946100	6284400	2940700	534070	1157100	6075200	9223200	6178700	1651400	5875900	3453300	1541900	3286700	1524600	411080	4699800	3587100	1692500	1378600	3277800	12314000	Bacteria;Cyanobacteria;unclassified;Oscillatoriales;unclassified;Trichodesmium;erythraeum;Trichodesmium erythraeum IMS101			pfam12784
TCCM_0360.00000330	0	0	305310	729080	25017000	24238000	6763200	0	1341100	3742600	8277700	593320	20074000	36370000	0	9695500	8914500	7568700	3953800	13787000	9356200	725060	6378700	1579900	595680	4617800	8229100	2542700	9844700	1343200	21015000	0	1947800	979120	0	0	0	Bacteria;Proteobacteria;Deltaproteobacteria;Myxococcales;Cystobacteraceae;Stigmatella;aurantiaca;Stigmatella aurantiaca DW4/3-1
TCCM_0494.00000060	6429100	5554200	17356000	7536100	15270000	22447000	5468400	5606800	5577500	3960800	4333600	3400200	11437000	5451300	13637000	6578000	6300400	8162300	5131900	1356600	3399800	10063000	10145000	7794400	2442500	6663100	5712000	5169000	3216000	869240	1583600	4962000	2964300	3719900	5296000	9493700	5489300	Bacteria;Cyanobacteria;unclassified;Oscillatoriales;unclassified;Trichodesmium;erythraeum;Trichodesmium erythraeum IMS101	Ribosomal protein S8	KO:K02994	pfam00410
TCCM_0237.00000030	3084600	2597100	5164700	4608000	6258300	8340200	2154000	606260	1993500	2241300	4921300	3321300	2908400	3427100	2634800	2293900	1609300	3857000	2247200	987260	918330	3818400	4629400	3456900	3172700	2632100	2717400	3539900	3401700	989390	789730	3276000	1760200	2250900	369330	1453000	2071200	Bacteria;Cyanobacteria;unclassified;Oscillatoriales;unclassified;Trichodesmium;erythraeum;Trichodesmium erythraeum IMS101	translation elongation factor EF-G	KO:K02355	pfam00009
TCCM_0504.00001390	0	0	0	0	10176000	8739600	1893700	4357200	0	3861300	23706000	50517000	0	0	0	21153000	59209000	65088000	17096000	5876000	9561600	31651000	67261000	95785000	9288100	31248000	39502000	12571000	45115000	1036500	31541000	36387000	17044000	11880000	0	0	0	Bacteria;Actinobacteria;Actinobacteria;Actinomycetales;Pseudonocardiaceae;Actinosynnema;mirum;Actinosynnema mirum 101, DSM 43827
TCCM_0436.00000050	8654300	8143600	9133900	11139000	10934000	18511000	2660300	1672500	5478400	6360400	7968200	6341600	6178700	4272100	3866000	5694700	4398500	8990500	4625100	1369800	2493600	6344700	10911000	9674500	5568300	7049600	4955800	7224300	6461800	648070	1089500	6326500	5007000	3720700	1011000	3481600	6882400	Bacteria;Cyanobacteria;unclassified;Oscillatoriales;unclassified;Trichodesmium;erythraeum;Trichodesmium erythraeum IMS101	NAD-dependent aldehyde dehydrogenases	KO:K00135	pfam00171
TCCM_0838.00000010	137860	409880	1016600	1471000	2544800	3694900	35438	577120	1241000	1659400	6373300	6425800	163720	812040	0	4104900	2222300	7197800	2521000	1195700	1019300	6523500	9909600	5521100	4641000	4593800	5771800	6882500	7272400	12969	32704	4268000	2386600	4793800	475170	1371500	26095	Bacteria;Proteobacteria;Alphaproteobacteria;Rhodobacterales;Rhodobacteraceae;Dinoroseobacter;shibae;Dinoroseobacter shibae DFL-12, DSM 16493	Phytanoyl-CoA dioxygenase (PhyH)./Phosphopantetheine attachment site.		pfam05721
TCCM_0026.00000080	1064800	3979200	3042600	3730400	5619200	8658100	1468000	243390	2663900	1837100	6641900	4004200	1852200	2562200	2420400	3011200	1519000	4591300	1508200	954920	714580	2851100	4778200	4031900	2352800	2352400	2307000	3335400	4617800	1380500	992430	1871300	2267000	1463900	1055800	1789100	2354100	Bacteria;Cyanobacteria;unclassified;Oscillatoriales;unclassified;Trichodesmium;erythraeum;Trichodesmium erythraeum IMS101	pyruvate kinase	KO:K00873	pfam00224
TCCM_0361.00000290	30049000	35269000	44179000	23095000	25985000	67026000	9144000	0	0	16022000	4275000	2212900	8827100	26233000	41312000	16001000	15091000	26305000	31584000	3019800	7516900	24835000	40628000	40443000	2867000	25060000	16317000	1723100	2348200	12385000	8938400	42248000	24312000	4964100	0	0	0	Bacteria;Cyanobacteria;unclassified;Oscillatoriales;unclassified;Trichodesmium;erythraeum;Trichodesmium erythraeum IMS101	RTX toxins and related Ca2+-binding proteins		pfam00353
TCCM_0415.00000330	25808000	14696000	19438000	19105000	36887000	61713000	12062000	6786800	16518000	11590000	24860000	18959000	12274000	17118000	18248000	14321000	11282000	21636000	5034700	3872700	5756300	10771000	11531000	23582000	13799000	7746000	5958500	17800000	16699000	1979300	4204900	10087000	10532000	14434000	3086900	7050700	3713000	Bacteria;Cyanobacteria;unclassified;Oscillatoriales;unclassified;Trichodesmium;erythraeum;Trichodesmium erythraeum IMS101	Molecular chaperone, HSP90 family	KO:K04079	pfam13589
TCCM_0305.00000330	7152400	0	1232200	5929100	5348900	7488900	1586500	0	0	0	32035000	38972000	3448400	4369100	0	10147000	9171100	19186000	16283000	4072600	6953400	17462000	31333000	29872000	17911000	21012000	13763000	19896000	23506000	511170	304300	23681000	13146000	11770000	0	644580	0	Plasmid:Bacteria;Actinobacteria;Actinobacteria;Actinomycetales;Streptomycetaceae;Streptomyces;rochei;Streptomyces rochei 7434AN4 plasmid pSLA2-L
TCCM_0812.00000360	5263900	6710900	16738000	15743000	18350000	35047000	6103700	2145400	5334400	6364800	17830000	21115000	7713400	11008000	11171000	5618300	4689400	13410000	6455100	4656300	4264300	10232000	17623000	21233000	11245000	10730000	10004000	10961000	13296000	2350600	3802100	8641400	8139500	6774000	2771900	3425900	4903000	Bacteria;Cyanobacteria;unclassified;Oscillatoriales;unclassified;Trichodesmium;erythraeum;Trichodesmium erythraeum IMS101	ribosomal protein S10, bacterial/organelle	KO:K02946	pfam00338
TCCM_0315.00000070	110990	2045300	3104300	2163200	5524200	16327000	1960900	2310100	5553800	3451100	5756200	8754200	3127500	4857400	1045000	6952400	2628900	7536900	4990700	1096400	1885800	5555900	8905100	8669000	6200800	5790200	7074100	4969700	6186400	120640	0	5433100	2306500	3728700	2271300	4739700	10221000	Bacteria;Cyanobacteria;unclassified;Chroococcales;unclassified;Cyanothece;sp.;Cyanothece sp. PCC 7822
TCCM_0001.00000500	6516000	10198000	12463000	10064000	11217000	15874000	2678000	2608300	3298100	7164800	9357100	14258000	1387900	2280700	5743000	8548600	6513900	12071000	9673000	2388800	3755500	22459000	21846000	19827000	7326300	9495700	9235400	14912000	15377000	0	1293800	18418000	9410700	4433600	1664900	6862200	0		Arylsulfatase A and related enzymes	KO:K01130	pfam00884
TCCM_0400.00000310	8286900	10662000	12430000	16031000	20217000	33743000	5077400	3059300	8189300	8560700	6082300	5979000	10531000	12341000	7827800	9795500	6907700	11858000	6427300	1095600	1535800	10368000	13828000	8393500	4631600	8530200	9038000	5443500	6303800	1761900	1435500	9469400	2508400	3410000	928760	2590000	2483800	Bacteria;Cyanobacteria;unclassified;Oscillatoriales;unclassified;Trichodesmium;erythraeum;Trichodesmium erythraeum IMS101	Choline dehydrogenase and related flavoproteins		pfam00732
TCCM_0051.00000030	6674300	1042800	3075500	4355100	10205000	17700000	3096500	2263100	3551600	3178400	7378300	7294600	4618000	7531800	1642600	4414000	3674100	6851400	2527200	1223900	1268800	4652400	6860300	9081800	5025900	3680900	3565500	6589400	5611000	934540	417330	3816400	2853700	3148300	1600900	3193800	3199900	Bacteria;Cyanobacteria;unclassified;Oscillatoriales;unclassified;Trichodesmium;erythraeum;Trichodesmium erythraeum IMS101	Uncharacterized protein conserved in bacteria	KO:K07192	pfam01145
TCCM_0223.00004070	15562000	0	17012000	3176300	552860	489330	0	66072	0	297240	0	0	1173600	1703800	8713900	552710	1155600	220400	3426300	0	43331	256950	1044100	0	0	206780	73395	0	0	61920	0	1309600	76117	278540	187310	682640	0	Eukaryota;Chordata;Mammalia;Primates;Hominidae;Homo;sapiens;Homo sapiens	Histones H3 and H4	KO:K11253	pfam00125
TCCM_0512.00000280	1425300	5788500	4751800	4575900	7342000	9748600	1662600	1718200	1801600	1355300	5306000	6443300	4146900	10234000	4593900	1861900	774070	4827300	1631700	1052800	1138900	3104300	5355400	5552800	5665400	3943200	2937000	6310400	5096700	733930	678120	3371500	3423100	5084000	662630	1944900	1801800	Bacteria;Cyanobacteria;unclassified;Oscillatoriales;unclassified;Trichodesmium;erythraeum;Trichodesmium erythraeum IMS101	Isocitrate dehydrogenases	KO:K00031	pfam00180
TCCM_0586.00000010	8769800	18572000	21359000	15997000	13694000	16505000	3849800	3430400	7011200	5708700	13086000	16801000	7448700	8450900	6716900	6081600	4853300	11641000	8517100	2793900	3422400	11436000	16365000	13969000	8703900	11330000	7898600	12489000	10099000	930540	1109000	14393000	6069800	8031700	2366000	4251900	3045100	Bacteria;Cyanobacteria;unclassified;Oscillatoriales;unclassified;Trichodesmium;erythraeum;Trichodesmium erythraeum IMS101	Sugar kinases, ribokinase family		pfam00294
TCCM_0016.00000040	3603700	7089500	8530800	8106000	10120000	15283000	2330000	1211500	4498200	5469100	9255600	7932400	4016700	4459900	2826700	4826100	3379300	8820900	2935800	1364000	970080	4118600	8069900	8354300	6961500	5277500	3959700	8014100	8363400	1910500	1435000	4407700	3338900	1152100	457540	2257200	2251200	Bacteria;Cyanobacteria;unclassified;Oscillatoriales;unclassified;Trichodesmium;erythraeum;Trichodesmium erythraeum IMS101	ATP sulphurylase	KO:K00958	pfam01747
TCCM_0364.00000140	14373000	6099500	7914500	3485200	52362000	58988000	12044000	7030000	14639000	18718000	28891000	26063000	12924000	17349000	7642400	20928000	11713000	26801000	12220000	4719800	6825700	20815000	24535000	20330000	24137000	17068000	15381000	20969000	28936000	2877700	4063100	16886000	9034700	12562000	4409900	7604200	1572700	Bacteria;Cyanobacteria;unclassified;Oscillatoriales;unclassified;Trichodesmium;erythraeum;Trichodesmium erythraeum IMS101	Photosystem II, DII subunit (also called Q(A))	KO:K02706	pfam00124
TCCM_0017.00000120	8354600	14423000	16300000	11995000	15937000	23895000	4774800	2441900	5557600	5631300	12516000	11678000	8162900	6731900	6872500	5312700	3640000	9334900	4674500	2081300	2240100	7958100	12502000	8984000	7184500	7313900	5602300	6980600	9995200	1561600	1138800	5176900	3899500	4274600	1966800	6415000	3682100	Bacteria;Cyanobacteria;unclassified;Oscillatoriales;unclassified;Trichodesmium;erythraeum;Trichodesmium erythraeum IMS101	DNA-directed RNA polymerase, alpha subunit, bacterial and chloroplast-type	KO:K03040	pfam03118
TCCM_0518.00000030	7473200	22572000	18291000	16365000	28896000	39070000	1571500	3755100	11594000	9081200	18001000	13056000	8232900	15476000	10466000	10843000	8315500	18571000	6593300	1807600	2054500	9498000	17771000	12149000	4385200	11118000	8256500	14370000	13224000	880440	3176500	8065200	1944600	5597100	1654300	6953600	787810	Bacteria;Cyanobacteria;unclassified;Oscillatoriales;unclassified;Trichodesmium;erythraeum;Trichodesmium erythraeum IMS101	ribosomal protein S3, bacterial type	KO:K02982	pfam00189
TCCM_0347.00000290	0	0	1578300	1507000	875310	1262400	0	1428400	2650200	2724800	6637900	7950600	501450	0	308280	6301800	4790000	8743800	9361200	2514900	2892700	9007800	24672000	11329000	7589100	16262000	9338600	5629500	3116300	128940	2673600	10594000	4763200	4021400	4257200	1372200	0	Bacteria;Cyanobacteria;unclassified;Oscillatoriales;unclassified;Trichodesmium;erythraeum;Trichodesmium erythraeum IMS101	Monoamine oxidase		pfam13450
TCCM_0680.00004650	51917000	48581000	35330000	8862200	2219200	1263800	6460400	21428000	6221300	901420	98978	0	3320500	5572400	11738000	14999000	4284200	474180	1279400	0	0	994920	1999500	66955	0	0	0	0	0	412240	0	1878600	0	634250	0	0	0	Eukaryota;Chordata;Actinopterygii;Cypriniformes;Cyprinidae;Danio;rerio;Danio rerio Tuebingen	Histone H2A	KO:K11251
TCCM_0487.00000260	0	0	4517500	4477800	4230300	7315000	1244300	2358400	6219800	8916600	5997400	17610000	397040	971060	1015300	14421000	9035900	30381000	27795000	4798600	5690400	35493000	22225000	25018000	6157800	16445000	16659000	9578700	12917000	2942300	2264200	39750000	15934000	10168000	0	0	0	Bacteria;Proteobacteria;Gammaproteobacteria;Xanthomonadales;Xanthomonadaceae;Xylella;fastidiosa;Xylella fastidiosa Temecula1	Putative multicopper oxidases		pfam07731
TCCM_0017.00000140	11667000	664520	755860	946940	16711000	26323000	5061400	3492600	6089000	4559600	23656000	22010000	10420000	16303000	44343	8199900	4156800	12318000	2815900	3520200	3934400	3575100	6360700	24681000	9367100	4034800	2963600	9700800	8374000	998300	960110	4112100	7284700	6536700	2537800	6700000	2795200	Bacteria;Cyanobacteria;unclassified;Oscillatoriales;unclassified;Trichodesmium;erythraeum;Trichodesmium erythraeum IMS101	30S ribosomal protein S13	KO:K02952	pfam00416
TCCM_0160.00000020	3364900	3138800	5058200	4562300	8338900	8409900	2452500	1626500	3046300	2481400	6664000	7338900	2463600	3219800	1804900	3345300	2455200	5450100	3081200	1380800	1759100	3535000	4568900	6574100	3852400	3248800	1656800	3577200	4129500	993960	632040	3461000	5023200	4388100	1397100	2872200	4371300	Bacteria;Cyanobacteria;unclassified;Oscillatoriales;unclassified;Trichodesmium;erythraeum;Trichodesmium erythraeum IMS101	Peptidyl-prolyl cis-trans isomerase (rotamase) - cyclophilin family		pfam00160
TCCM_0135.00000030	5575100	5257100	7420700	8457400	9795500	18407000	2105900	874210	5140200	3412200	9214500	10535000	4771300	4442200	2971200	4109600	3048200	8309700	4158800	2593400	2849000	7199800	14926000	11860000	6017400	8081300	6752400	6301400	8422100	1115300	718660	5587900	4399500	3840800	141150	2222100	1852900	Bacteria;Cyanobacteria;unclassified;Oscillatoriales;unclassified;Trichodesmium;erythraeum;Trichodesmium erythraeum IMS101	Phage shock protein A (IM30), suppresses sigma54-dependent transcription	KO:K03969	pfam04012
TCCM_0454.00000010	10931000	13055000	21304000	21003000	29000000	41994000	7421600	2660000	8619400	9348400	2230600	3692500	10055000	9383600	8173100	12109000	7072100	18586000	5705800	629380	902960	8518200	17126000	9630900	1224900	9192400	7665100	1753500	1777600	1323700	1591700	5278200	1076400	702420	2271200	10446000	1508600	Bacteria;Cyanobacteria;unclassified;Oscillatoriales;unclassified;Trichodesmium;erythraeum;Trichodesmium erythraeum IMS101	ribosomal protein S4, bacterial/organelle type	KO:K02986	pfam00163
TCCM_0151.00000250	6073600	9057500	13279000	14876000	18331000	28754000	4991500	4329400	10541000	11367000	11189000	9711200	3708300	5345200	2758600	8000500	5511400	11191000	6250800	1806400	3036900	9057200	14741000	13951000	7074200	10216000	7860400	5871000	10670000	3458900	3237700	11333000	10654000	5788900	764240	2468900	3209700	Bacteria;Cyanobacteria;unclassified;Oscillatoriales;unclassified;Trichodesmium;erythraeum;Trichodesmium erythraeum IMS101	phosphonate ABC transporter, periplasmic phosphonate binding protein	KO:K02044	pfam12974
TCCM_0400.00005970	319520	0	0	0	731310	2499200	931120	0	0	0	585360	787870	781130	1161800	1620500	2172300	1120900	0	7249800	414700	340400	16359000	25387000	0	452160	14847000	11213000	461660	760060	0	2370700	11898000	607310	355480	0	0	0	Bacteria;Cyanobacteria;unclassified;Oscillatoriales;unclassified;Trichodesmium;erythraeum;Trichodesmium erythraeum IMS101	Nitrogen regulatory protein PII	KO:K04751	pfam00543
TCCM_0154.00000020	10888000	7000300	8555700	9061600	20336000	26491000	4975600	1954400	4803700	4267000	23506000	19105000	9925000	14359000	6726200	5178100	4394900	11631000	6947400	3220000	4851600	10744000	16930000	20463000	11917000	12456000	7854300	12634000	11394000	1736500	2191000	9949500	9540200	11869000	313600	757380	3997200	Bacteria;Cyanobacteria;unclassified;Oscillatoriales;unclassified;Trichodesmium;erythraeum;Trichodesmium erythraeum IMS101	50S ribosomal protein L11	KO:K02867	pfam00298
TCCM_0416.00000020	5767100	6453000	8488300	6107600	3238400	5584900	362120	590600	1879500	1928900	26861000	19997000	1365200	1973200	5099400	3291900	3182700	10003000	10031000	2082200	4782700	17528000	29660000	27651000	16872000	15899000	12527000	14590000	7509400	1339400	4380200	13093000	18849000	13248000	0	0	1780900	Bacteria;Cyanobacteria;unclassified;Oscillatoriales;unclassified;Trichodesmium;erythraeum;Trichodesmium erythraeum IMS101	Photosystem II 12 kDa extrinsic protein (PsbU).	KO:K02719	pfam06514
TCCM_0401.00000010	4206800	9653400	9706300	8738800	9140000	14911000	2713100	1535500	3050300	3392400	4528000	5779100	4381900	6283100	5923700	3025800	2714800	6226000	2878200	1222900	1207800	5245600	8239700	5019700	3566900	4462500	3588000	4748400	6391700	1869600	742900	4728400	3135300	3411500	1588300	2988600	3386100	Bacteria;Cyanobacteria;unclassified;Oscillatoriales;unclassified;Trichodesmium;erythraeum;Trichodesmium erythraeum IMS101	Highly conserved protein containing a thioredoxin domain	KO:K06888	pfam03190
TCCM_0189.00000030	22875000	48556000	49737000	50443000	42327000	58452000	7076100	7224300	8392000	14336000	33544000	38534000	30765000	33650000	12740000	7008700	8405500	21311000	9568600	7110100	7880600	15041000	22269000	16806000	11831000	29621000	2830000	23519000	26699000	4232200	1886900	7175300	20051000	15931000	0	0	0
TCCM_0518.00000060	9766900	2078200	8822700	15777000	11850000	24091000	6078200	2635400	7306300	3989900	11626000	8327300	5515600	4846900	4509500	10393000	6713800	24003000	3183000	3388100	4127600	4065300	5305300	20249000	8779900	4749200	1344500	4167900	5181100	0	0	3067700	8348200	8276900	2015700	4410300	2998300	Bacteria;Cyanobacteria;unclassified;Oscillatoriales;unclassified;Trichodesmium;erythraeum;Trichodesmium erythraeum IMS101	ribosomal protein L2, bacterial/organellar	KO:K02886	pfam03947
TCCM_0736.00000920	4774800	0	5623500	318470	22354000	29394000	4364000	11386000	50721000	36197000	100710000	121100000	9558000	14987000	0	39340000	12296000	68295000	29706000	11753000	15884000	54201000	57710000	91473000	66928000	30527000	14430000	60419000	27220000	0	0	36485000	45394000	16771000	0	0	0		von Willebrand factor type A domain.		pfam13519
TCCM_0729.00000070	2926100	1254500	0	598290	0	1537100	288810	0	0	0	5722000	6115700	0	0	1890900	2144200	1550300	2161600	2048100	48324	285540	10062000	5962700	2468500	1227700	4530000	1134400	703320	1225200	433990	232320	757190	565950	633940	12339000	38840000	0	Bacteria;Cyanobacteria;unclassified;Oscillatoriales;unclassified;Trichodesmium;erythraeum;Trichodesmium erythraeum IMS101	Methionine synthase II (cobalamin-independent)	KO:K00549	pfam08267
TCCM_0936.00000130	0	443380	3766600	5911900	16621000	31498000	7589500	721710	1346000	8650500	1105400	0	26501000	61931000	369780	10152000	8394000	21227000	6585900	9091600	9455500	924670	6894900	1671800	377220	3201500	13556000	894070	2297900	4428200	60336000	0	2043900	1267300	0	0	0
TCCM_0734.00000160	10815000	4125200	6427100	4633200	14559000	28260000	4717600	4881800	10391000	9501900	15475000	18252000	12928000	12933000	7848100	9650200	6559500	20000000	8328700	2530000	3868100	11201000	16903000	19703000	9049100	11861000	6676400	14718000	12830000	1656400	1178900	9992900	8834300	6658100	2546600	8287800	18742000	Bacteria;Cyanobacteria;unclassified;Oscillatoriales;unclassified;Trichodesmium;erythraeum;Trichodesmium erythraeum IMS101	dihydroneopterin aldolase	KO:K01633	pfam02152
TCCM_0244.00000130	15750000	15026000	11281000	32314000	23884000	31967000	6663800	2768400	8978100	7965300	1242700	4757500	11244000	11361000	10671000	12190000	7371900	13624000	11409000	6507000	7255600	15034000	26011000	21620000	4244500	18026000	9665800	11245000	15258000	4579100	3332100	21465000	14907000	828790	2649900	10205000	4208000	Bacteria;Cyanobacteria;unclassified;Oscillatoriales;unclassified;Trichodesmium;erythraeum;Trichodesmium erythraeum IMS101	Inorganic pyrophosphatase	KO:K01507	pfam00719
TCCM_0450.00000040	6798900	4073100	10634000	11009000	13564000	14654000	2354700	1623300	4040300	3060600	7388800	6066100	7128700	6742600	5047000	4437400	3211800	6105800	4445200	1359200	1328900	5730800	13554000	5153600	4581900	5353900	4282500	5458300	7254400	1752800	1730100	8150500	2744600	2992300	2496500	4933000	4410200	Bacteria;Cyanobacteria;unclassified;Oscillatoriales;unclassified;Trichodesmium;erythraeum;Trichodesmium erythraeum IMS101	arsenite-activated ATPase ArsA/arsenite-activated ATPase ArsA	KO:K01551	pfam02374
TCCM_0120.00000080	95911	0	1312100	0	3149100	1414500	86205	1630400	4505400	3758800	20280000	15734000	1459700	1606100	0	7616600	4791900	8165500	7081900	1582100	1376100	13185000	16296000	10215000	10639000	11789000	8807900	11713000	11510000	306200	1054400	16559000	7755500	7876300	188100	0	264090	Bacteria;Cyanobacteria;unclassified;Oscillatoriales;unclassified;Microcoleus;chthonoplastes;Microcoleus chthonoplastes PCC 7420	Predicted metal-dependent hydrolase of the TIM-barrel fold		pfam04909
TCCM_0315.00000010	2747100	5567700	4669400	4610500	5056800	10253000	1787600	340370	2595800	2682500	2809900	1849000	3240100	2670800	2996100	2391300	1207300	3557800	2758500	376730	424300	4381600	5174000	3034900	1492000	3955200	3038100	2109000	2529500	1052900	384030	4129200	614060	1787700	528640	1932500	1359600	Bacteria;Cyanobacteria;unclassified;Oscillatoriales;unclassified;Trichodesmium;erythraeum;Trichodesmium erythraeum IMS101	cyanophycin synthetase	KO:K03802	pfam08245
TCCM_0711.00000260	1367900	2838800	3961100	3254400	12346000	12561000	2498700	1001100	4194900	3673200	10806000	12590000	3438600	3495800	915620	8154900	5042800	9819700	5574600	3025100	1883700	8948500	17570000	9788500	7012600	8000100	6736100	11244000	17286000	478180	2130700	6079900	4659200	6182000	335230	1494100	0	Bacteria;Cyanobacteria;unclassified;Oscillatoriales;unclassified;Trichodesmium;erythraeum;Trichodesmium erythraeum IMS101	NADPH:quinone reductase and related Zn-dependent oxidoreductases		pfam08240
TCCM_0450.00000020	5271200	5913100	10334000	7616600	13970000	16930000	2646600	0	3684800	575560	3615200	2953100	7811500	13619000	5194400	4263200	1238900	4401400	3748100	781200	760970	5994500	9155500	4539400	1853400	2469700	2279600	2639100	3327500	2442700	2971900	5717900	2721300	2543500	2179000	6674100	4019700	Bacteria;Cyanobacteria;unclassified;Oscillatoriales;unclassified;Trichodesmium;erythraeum;Trichodesmium erythraeum IMS101	gas vesicle protein GvpN		pfam07728
TCCM_0914.00000150	7386900	5762200	6066700	6526100	10320000	9679600	2169100	1537700	4530300	4675200	3955500	2184200	4856100	4996400	4225600	3023300	3019500	5950900	3189900	799180	1655200	3933500	8588200	4801200	1466500	5267000	2224400	3865500	5636200	1588200	1282800	4484100	2406500	2201400	2000500	3529900	9130900	Bacteria;Cyanobacteria;unclassified;Oscillatoriales;unclassified;Trichodesmium;erythraeum;Trichodesmium erythraeum IMS101	protein RecA	KO:K03553	pfam00154
TCCM_0419.00000330	7142800	10234000	24776000	19170000	19143000	22528000	5875300	2594900	7852600	8611400	44994000	41347000	13895000	22880000	4628300	13951000	13966000	32648000	16501000	19723000	13528000	19169000	33542000	51608000	20924000	19882000	17946000	27060000	80131000	1016100	378490	16363000	23159000	20616000	0	0	0	Bacteria;Cyanobacteria;unclassified;Oscillatoriales;unclassified;Trichodesmium;erythraeum;Trichodesmium erythraeum IMS101
TCCM_0402.00000390	4245200	8227400	9128000	12211000	23503000	26127000	2266500	2281000	6799000	5756900	4309500	3919500	5257000	11025000	5930900	4333600	3838100	10906000	971840	1329700	1769400	2508500	5099400	7318700	2304100	2361300	2092400	2963000	8350700	523650	574120	2223300	3996500	1994900	861770	2540300	3202500	Bacteria;Cyanobacteria;unclassified;Oscillatoriales;unclassified;Trichodesmium;erythraeum;Trichodesmium erythraeum IMS101	Ketol-acid reductoisomerase	KO:K00053	pfam07991
TCCM_0061.00000060	11600000	19184000	25741000	13556000	16466000	37502000	6802600	2780700	5257500	6597500	8247500	11254000	9194700	13455000	15359000	8201900	4891700	15673000	7619600	4242300	5472300	13160000	14269000	15641000	11281000	9916200	7799900	12938000	12190000	3240900	3411300	8593600	9074200	6165600	2095600	5229800	0	Bacteria;Cyanobacteria;unclassified;Oscillatoriales;unclassified;Trichodesmium;erythraeum;Trichodesmium erythraeum IMS101	Ribosomal protein L23	KO:K02892	pfam00276
TCCM_0410.00000020	5752900	6953700	8963200	7058200	15129000	20652000	4374000	1987400	4525000	4900200	11209000	14266000	6180400	6022300	2975500	6620400	3419700	11222000	3003000	2998300	2179900	5003300	8579900	10562000	9308800	6763600	4636000	9074800	8888700	2409800	874960	4173200	4334400	6085100	1752400	5000400	1214700	Bacteria;Cyanobacteria;unclassified;Oscillatoriales;unclassified;Trichodesmium;erythraeum;Trichodesmium erythraeum IMS101	Pyruvate/2-oxoglutarate dehydrogenase complex, dihydrolipoamide acyltransferase (E2) component, and related enzymes	KO:K00627	pfam00198
TCCM_0255.00000120	4396200	5188400	10408000	26566000	11601000	12224000	1734500	15719000	18821000	37000000	1148700	698710	2431500	4655300	1647900	35092000	23091000	40275000	29509000	2094500	2868800	27034000	60304000	12576000	967150	32422000	15265000	4266900	2118400	0	7938300	34030000	9148900	1374100	0	0	0
TCCM_0924.00000130	30515000	42648000	52905000	38991000	32007000	58468000	12295000	8785300	12955000	16667000	28477000	23516000	26393000	21869000	19782000	21488000	10558000	19004000	19979000	3663100	3925500	30287000	50328000	20236000	15943000	29601000	23764000	17331000	24710000	7368400	6935500	24911000	9656800	10312000	3702000	6820400	4723600	Bacteria;Cyanobacteria;unclassified;Oscillatoriales;unclassified;Trichodesmium;erythraeum;Trichodesmium erythraeum IMS101	Phycobilisome protein.	KO:K02096	pfam00502
TCCM_0098.00000010	661570	2371500	4352400	5321000	8459900	13965000	2428800	0	3470100	1544700	3491100	3091600	1818700	2305800	1583400	2830300	1839500	2069300	2033000	1209100	600290	4315900	5395700	3284200	2787100	3079700	2541000	2904800	2899500	153550	209050	3051400	1363800	1017800	336410	1939600	2980300	Bacteria;Cyanobacteria;unclassified;Oscillatoriales;unclassified;Trichodesmium;erythraeum;Trichodesmium erythraeum IMS101	NADH:ubiquinone oxidoreductase 49 kD subunit 7	KO:K05579	pfam00346
TCCM_0399.00000030	900600	1391500	2097000	6224800	4636300	8859400	931320	419220	1000000	1047800	11627000	8475300	4566900	3276900	496670	3008600	2696000	4795100	1863000	1935400	2735200	7357800	11954000	14048000	4513700	9983700	2871400	4981400	11424000	1356200	293770	5556900	7960600	7134400	0	198290	0	Bacteria;Cyanobacteria;unclassified;Oscillatoriales;unclassified;Trichodesmium;erythraeum;Trichodesmium erythraeum IMS101
TCCM_0856.00000480	12949000	4691600	6642800	8410100	12886000	28385000	4721200	3270200	9671100	9302400	13335000	13718000	5989500	5467400	2611500	10697000	9317700	17430000	5643800	2532600	2794900	6023600	9720700	9698100	7647500	5737400	4973600	6524900	6401200	3629200	3702500	9018800	6203800	7209700	193160	2357800	4329600	Bacteria;Cyanobacteria;unclassified;Oscillatoriales;unclassified;Trichodesmium;erythraeum;Trichodesmium erythraeum IMS101	photosystem I iron-sulfur protein PsaC	KO:K02691	pfam12838
TCCM_0573.00000020	4412700	10199000	11537000	13702000	12366000	19651000	4009200	2641400	5185900	3999400	15373000	9103500	4926900	5211200	8205300	5414900	3387600	8148600	2444000	1781200	1486300	4436700	6720000	8790900	8065300	4337900	2199600	8328100	10085000	1431600	952500	4302100	4210900	4209700	1254000	2737500	3977400	Bacteria;Cyanobacteria;unclassified;Oscillatoriales;unclassified;Trichodesmium;erythraeum;Trichodesmium erythraeum IMS101	dihydrolipoamide dehydrogenase	KO:K00382	pfam07992
TCCM_0102.00000240	11606000	3922200	6923200	11825000	13730000	20033000	1697600	2195900	2916400	3817900	9533900	13372000	11129000	10417000	5090700	3352900	2368800	11354000	1670700	2498100	3037100	2365800	4977300	7561700	8584300	3426100	2304800	9945800	9945800	390100	169620	2454300	6982000	7715700	1757700	4047200	2715000	Bacteria;Cyanobacteria;unclassified;Oscillatoriales;unclassified;Trichodesmium;erythraeum;Trichodesmium erythraeum IMS101	Galactose mutarotase and related enzymes		pfam01263
TCCM_0579.00001230	0	0	0	11281000	1279600	3915500	0	0	0	0	25296000	15962000	2102700	6004500	3634000	2649300	1123400	5126900	5299500	3968400	5598400	9143000	3529400	13791000	5901200	2097400	9092600	36516000	50278000	0	0	7633200	21155000	24672000	0	0	0	Bacteria;Cyanobacteria;unclassified;Oscillatoriales;unclassified;Trichodesmium;erythraeum;Trichodesmium erythraeum IMS101
TCCM_0940.00000020	4421300	6147900	4087600	5887800	8658000	12057000	1791500	1471000	3633400	4413900	8666700	6501700	2346900	3932100	4220100	4890200	2958000	5185400	4431900	1157400	1453400	5845900	10334000	6605600	4224700	6777100	4714600	4186100	5374900	1367600	663620	6031400	4470700	5140400	610450	1829600	1934900	Bacteria;Cyanobacteria;unclassified;Oscillatoriales;unclassified;Trichodesmium;erythraeum;Trichodesmium erythraeum IMS101	Phosphoglucomutase	KO:K01835	pfam02878
TCCM_0110.00005500	2053000	0	0	664400	543750	3173200	0	2196500	2946800	4073400	9843300	7385100	57261	447240	0	3850200	4402300	6257500	6528700	6069700	6173900	3036200	5645500	4100200	7987200	3595400	2382900	4551600	14832000	0	11563000	9034800	9249800	6803000	0	0	0	Bacteria;Bacteroidetes;Cytophagia;Cytophagales;Cytophagaceae;Microscilla;marina;Microscilla marina ATCC 23134	Phage tail sheath protein FI	KO:K06907	pfam04984
TCCM_0404.00000140	7285300	14765000	11926000	16543000	11515000	21111000	3270500	4043600	6167700	7332000	6456100	7802900	6861600	9281500	8058800	8006400	5479000	11025000	7280300	1589500	2045300	10158000	14049000	6954000	4913400	8853500	6760900	3271000	4508500	1362100	1144800	9998900	2516700	2569500	2756800	7093300	16212000	Bacteria;Cyanobacteria;unclassified;Oscillatoriales;unclassified;Trichodesmium;erythraeum;Trichodesmium erythraeum IMS101
TCCM_0187.00000010	4688400	4961200	6502500	9407200	5317600	10049000	2813100	354190	2931900	1277800	5029300	4156000	3782200	3306900	4110800	2417300	1118100	5507700	1972000	905950	1005800	3911800	6120200	4195800	3249200	5159500	2117500	4281500	4287500	1555800	1207400	4022800	2597500	3335500	305430	1244300	1802900	Bacteria;Cyanobacteria;unclassified;Oscillatoriales;unclassified;Trichodesmium;erythraeum;Trichodesmium erythraeum IMS101	Carbamoylphosphate synthase large subunit (split gene in MJ)	KO:K01955	pfam02786
TCCM_0665.00000230	3685700	5933100	8086400	6073100	10357000	16462000	3412200	1604600	3195700	3414500	6868900	6913900	3910200	5440900	3467600	5732900	2136100	9397300	3370200	1465700	1185900	4409500	7334100	3663500	3589000	4815400	3065800	3641800	5381400	1972200	1906200	5212400	2350200	2728100	887490	2982000	2518400	Bacteria;Cyanobacteria;unclassified;Oscillatoriales;unclassified;Trichodesmium;erythraeum;Trichodesmium erythraeum IMS101	ADP-heptose:LPS heptosyltransferase		pfam01075
TCCM_0378.00000060	8949700	12735000	8397600	12421000	21436000	15504000	3452000	3480400	9734300	6839800	26333000	17643000	8161900	5181400	5462800	11600000	5581300	21644000	6564200	4554700	5484800	11979000	18977000	24099000	14677000	10263000	8088800	13927000	21066000	3182600	2651700	11523000	13082000	11017000	610880	2895100	3545300	Bacteria;Cyanobacteria;unclassified;Oscillatoriales;unclassified;Trichodesmium;erythraeum;Trichodesmium erythraeum IMS101	cytochrome c-550	KO:K02720	pfam14495
TCCM_0659.00000340	1688500	3815900	6693000	6410600	8101700	15675000	2026700	2275000	7132200	6159000	14683000	16227000	4935900	3222900	2593900	7030800	4275800	10874000	1497500	2517200	1972500	3029000	10050000	14925000	10306000	4607200	1250900	9754000	9229400	1013200	911700	3305000	9339800	4742200	0	823040	4515600	Bacteria;Cyanobacteria;unclassified;Oscillatoriales;unclassified;Trichodesmium;erythraeum;Trichodesmium erythraeum IMS101	Serine protease inhibitor		pfam00079
TCCM_0906.00000020	5369000	7997000	5121800	5820800	8206900	12793000	2272700	1512500	3809900	2211400	3396200	2820300	4718200	3232900	4807900	2358200	1981300	3160500	2313500	657830	621310	3502600	5931900	2609300	2460800	4352100	3424900	2491100	3456300	896290	868630	3604700	1169200	1230200	957150	2586200	624310	Bacteria;Cyanobacteria;unclassified;Oscillatoriales;unclassified;Trichodesmium;erythraeum;Trichodesmium erythraeum IMS101	Exoribonuclease R	KO:K12573	pfam00773
TCCM_0051.00000040	6925900	8029500	8924300	7852000	11377000	17535000	2728700	1574800	3686300	2809300	8016700	6201900	3741500	3525600	4703700	3964000	2262600	7076200	1546400	1197900	1394300	4101200	6010400	5485900	4636800	4131800	2629400	5331400	5504600	1187100	986170	4834500	3096300	2848900	906100	2230500	3242200	Bacteria;Cyanobacteria;unclassified;Oscillatoriales;unclassified;Trichodesmium;erythraeum;Trichodesmium erythraeum IMS101	Uncharacterized protein conserved in bacteria	KO:K07192	pfam01145
TCCM_0803.00000020	9128300	14731000	11862000	12252000	10515000	17451000	2902200	3259700	7360200	7724400	3944600	1774100	6953800	5549800	6852600	5679400	5422700	9434700	6513800	654970	1760200	7924500	13791000	6380900	1696800	8875300	4712900	1494000	4248900	1404200	1129200	7648600	4127000	3019700	1124700	5571000	2977100	Bacteria;Cyanobacteria;unclassified;Oscillatoriales;unclassified;Trichodesmium;erythraeum;Trichodesmium erythraeum IMS101	Citrate synthase	KO:K01647	pfam00285
TCCM_0787.00000010	6544400	3666700	5936200	8105300	5275700	11996000	1992700	2934800	3323400	3927800	5263300	4608400	3199000	3373500	3294400	4210200	2837900	6574900	3185300	1771500	1205800	4280900	6282400	5229100	2716300	4247200	2970800	3042200	6855100	1542500	1049000	4890800	2344300	3198600	3966100	8097100	8850500	Bacteria;Cyanobacteria;unclassified;Oscillatoriales;unclassified;Trichodesmium;erythraeum;Trichodesmium erythraeum IMS101	Uncharacterized proteins involved in stress response, homologs of TerZ and putative cAMP-binding protein CABP1	KO:K05795	pfam02342
TCCM_0579.00000030	3285100	5870600	7814500	6472000	6275700	10202000	2071400	1079100	2750600	2345400	4234600	2842500	2845100	3456300	3090900	2652600	1709800	3717000	2978400	590140	525450	5696700	9921500	2993400	2918800	6189900	3711600	2292000	3960800	382580	418600	5972700	1535900	1141700	539450	2100500	2841400	Bacteria;Cyanobacteria;unclassified;Oscillatoriales;unclassified;Trichodesmium;erythraeum;Trichodesmium erythraeum IMS101	aspartyl/glutamyl-tRNA(Asn/Gln) amidotransferase, B subunit	KO:K02434	pfam02934
TCCM_0911.00000600	0	0	0	0	773080	270030	502720	0	0	73335	299710	1419400	0	0	0	29203	0	95282	0	398790	770420	31592000	34660000	32000	2967200	15262000	12437000	1538800	981650	427880	19172000	21716000	1923400	2579700	0	0	0
TCCM_0028.00000030	3070600	3828100	3840100	5300000	5892300	9689700	1338500	1112300	2648900	2666900	6153500	7097100	3356100	4370400	3536500	2831500	2398600	3811500	2732400	1394500	1558400	6494800	8767600	5805600	3125400	4620900	3949700	4995000	5391400	1324000	596220	4081000	2641400	2700500	699780	2407700	2383300	Bacteria;Cyanobacteria;unclassified;Oscillatoriales;unclassified;Trichodesmium;erythraeum;Trichodesmium erythraeum IMS101	ribosomal subunit interface protein	KO:K05808	pfam02482
TCCM_0302.00000040	2806800	2795300	4240100	4181100	4906100	9774300	1603200	484700	1202100	815990	5294500	2992500	2529100	2383300	2476200	2122000	751070	3138100	1849900	675580	622560	2560700	6992800	3606200	1974900	2558900	2274400	2515000	3080300	1450800	482570	1893800	1373300	1481300	774810	1168300	1498400	Bacteria;Cyanobacteria;unclassified;Oscillatoriales;unclassified;Trichodesmium;erythraeum;Trichodesmium erythraeum IMS101	Putative peptidoglycan-binding domain-containing protein	KO:K01185	pfam01471
TCCM_0374.00000010	8702600	0	0	0	13275000	21495000	4361000	1785800	2416700	2450200	20133000	19835000	7217000	8663400	4887800	3679300	2577500	8792300	3213800	2746600	3840600	7360000	9764900	14319000	9535500	7658500	4880600	13244000	17272000	1432700	1194900	6240200	8842000	10950000	0	1087000	3651700	Bacteria;Cyanobacteria;unclassified;Oscillatoriales;unclassified;Trichodesmium;erythraeum;Trichodesmium erythraeum IMS101	RNA-binding proteins (RRM domain)		pfam00076
TCCM_0150.00000010	7847100	12959000	12663000	11035000	14669000	20052000	2737600	2935500	7169900	7585600	4421700	5106800	8658300	11164000	5358400	4640400	4563600	11950000	4220600	1312500	1810300	11305000	14450000	11014000	2809700	7595300	5687300	4326400	8976100	1544600	1365000	7519200	4051000	1808900	1643200	5423800	6860200	Bacteria;Cyanobacteria;unclassified;Oscillatoriales;unclassified;Trichodesmium;erythraeum;Trichodesmium erythraeum IMS101	pyruvate dehydrogenase E1 component, alpha subunit	KO:K00161	pfam00676
TCCM_0896.00000010	4120200	3153200	8190000	3899700	14527000	14383000	2851300	328320	3673300	2211200	3689300	2725000	3935600	3690000	2478100	3721300	2260500	4891400	1928900	886880	751170	2267800	4822700	5753300	3374700	2680800	1890400	3517600	4024300	571900	223260	2261000	1488900	1638800	1712700	3112400	993990	Bacteria;Cyanobacteria;unclassified;Oscillatoriales;unclassified;Trichodesmium;erythraeum;Trichodesmium erythraeum IMS101	Long-chain acyl-CoA synthetases (AMP-forming)	KO:K01897	pfam00501
TCCM_0490.00000030	9871800	0	936960	9938.2	6098100	19528000	3149400	3270200	4650000	5994500	23293000	44664000	5285100	4155400	1369500	9793200	7182100	16440000	5964300	5980700	4794600	10809000	16061000	42580000	17587000	9870700	6250200	17857000	18798000	124550	869930	10567000	12432000	8741500	0	196150	6408600	Bacteria;Cyanobacteria;unclassified;Oscillatoriales;unclassified;Trichodesmium;erythraeum;Trichodesmium erythraeum IMS101	thioredoxin		pfam00085
TCCM_0208.00000050	1582200	12523000	9899500	10265000	10320000	14498000	2464400	4066700	9089700	10276000	16297000	15133000	3084000	3680000	3873400	10991000	9126800	19011000	16356000	2667200	3179300	23641000	36763000	16412000	11178000	23792000	14578000	11119000	14533000	2910800	2345700	28637000	9387300	4765500	0	0	6382700	Bacteria;Cyanobacteria;unclassified;Oscillatoriales;unclassified;Trichodesmium;erythraeum;Trichodesmium erythraeum IMS101	DNA-binding protein, YbaB/EbfC family	KO:K09747	pfam02575
TCCM_0037.00000020	7793400	4217100	13457000	11761000	13357000	16781000	3883500	2419900	5935000	3480400	18621000	22171000	10722000	11378000	4354400	9070800	5836100	25330000	5136700	1780300	1738000	6190700	16367000	17479000	10674000	13938000	6965200	24437000	10018000	2174600	1668900	7315100	7094600	5323400	235570	0	4746600	Bacteria;Cyanobacteria;unclassified;Oscillatoriales;unclassified;Trichodesmium;erythraeum;Trichodesmium erythraeum IMS101	Peptidyl-prolyl cis-trans isomerase (rotamase) - cyclophilin family	KO:K01802	pfam00160
TCCM_0607.00000040	2181800	3652800	7427700	7978000	7541600	11006000	2258100	439410	2138400	1642700	6896800	4989300	3269200	4074600	4603400	1763800	1740300	2894800	2638800	677550	990280	4848800	5196200	6345400	2376300	3726900	3865300	2899400	5111800	662320	168180	3453800	1697400	2865000	224500	1398600	2415400	Bacteria;Cyanobacteria;unclassified;Oscillatoriales;unclassified;Trichodesmium;erythraeum;Trichodesmium erythraeum IMS101	signal recognition particle protein	KO:K03106	pfam00448
TCCM_0962.00000010	110810	968060	1944600	1739200	2628800	5268200	763480	248090	1905000	414560	6861300	4966100	1330900	2551400	1089000	1927800	2896800	4472500	3710500	1231400	1439600	5560600	7910200	4861500	3684400	6508600	4374900	3427700	3045100	215890	223110	5174300	3387600	3069600	733370	597630	2376900	Bacteria;Cyanobacteria;unclassified;Oscillatoriales;unclassified;Trichodesmium;erythraeum;Trichodesmium erythraeum IMS101	Acetyltransferases
TCCM_0034.00000240	4620600	3999900	7849200	7404700	4866700	7254800	1945500	1358800	2890200	2792500	4835000	4337300	3138800	3843500	3756500	5712400	4112900	7421500	3606400	2022100	1906000	6978800	10613000	7949600	4404700	8311500	5098000	7011600	7624600	842810	1112900	5814100	3774000	1792000	1631000	3089500	5334900	Bacteria;Cyanobacteria;unclassified;Oscillatoriales;unclassified;Trichodesmium;erythraeum;Trichodesmium erythraeum IMS101	C-terminal peptidase (prc)	KO:K03797	pfam03572
TCCM_0550.00000140	8966800	11155000	9468900	13179000	33415000	45397000	6248600	5428100	10132000	13666000	19245000	22353000	10168000	13019000	4718700	14968000	10620000	28448000	12608000	4922500	5676300	12539000	21402000	20342000	9525200	14342000	8787800	9873800	16909000	7137900	10636000	14527000	14466000	8033700	2487900	6815700	5615100	Bacteria;Cyanobacteria;unclassified;Oscillatoriales;unclassified;Trichodesmium;erythraeum;Trichodesmium erythraeum IMS101	Membrane proteins related to metalloendopeptidases	KO:K02634	pfam01333
TCCM_0162.00000030	1294200	3741000	3016600	7140700	3900200	9235000	2397800	1497500	532520	2046800	4746800	5172400	5446000	6038300	4510200	2745800	690580	4496000	3410200	1249800	1198700	4171300	4492200	6710900	3168200	3966600	2221600	3722800	3668300	623550	363950	3380700	3425900	4054700	1129400	2229100	6774800	Bacteria;Cyanobacteria;unclassified;Oscillatoriales;unclassified;Trichodesmium;erythraeum;Trichodesmium erythraeum IMS101	Asparaginase	KO:K01424	pfam01112
TCCM_0175.00000010	7415500	9649200	19123000	5558900	12116000	17673000	1863400	1675100	6016200	2656600	5812000	4872300	4623700	3023400	8233300	2110300	1537200	3886400	2568300	751500	1210000	3609700	4226900	4386600	2978000	3510600	2754900	4353500	5181300	1326100	1879600	3302200	3561000	3395100	857590	2563600	1335200	Bacteria;Cyanobacteria;unclassified;Oscillatoriales;unclassified;Trichodesmium;erythraeum;Trichodesmium erythraeum IMS101	GDP-mannose 4,6-dehydratase	KO:K01711	pfam01370
TCCM_0849.00000010	2716500	3690200	10060000	4798600	5035300	10734000	2501500	1594100	3394000	416580	5597800	7686800	1625300	2735100	2047700	5166800	3079900	5923400	3910300	1203500	1444600	6607800	8796200	5734500	3731300	4785000	3839000	6381500	3099400	431070	583000	6473900	2904600	2080200	1357100	2062500	1982000	Bacteria;Cyanobacteria;unclassified;Oscillatoriales;unclassified;Trichodesmium;erythraeum;Trichodesmium erythraeum IMS101	ferredoxin-sulfite reductase	KO:K00392	pfam01077
TCCM_0157.00000160	6340200	5169400	6697900	6724300	8608100	10305000	2134000	1919600	3801100	2664100	6458700	6568100	4427100	4155400	5295700	3094200	3014200	5831900	2621300	1248600	1136900	4879800	6632400	6362200	3940400	3507700	2894700	3962400	6033600	975720	1072300	3405600	3932600	2909000	1037900	1283600	1614700	Bacteria;Cyanobacteria;unclassified;Oscillatoriales;unclassified;Trichodesmium;erythraeum;Trichodesmium erythraeum IMS101	Homoserine dehydrogenase	KO:K00003	pfam00742
TCCM_0228.00000340	24050000	10833000	27888000	19898000	59334000	81201000	15526000	11291000	22155000	23095000	4506200	2884000	19353000	24687000	17869000	31797000	20507000	27727000	26845000	2291800	4631300	34907000	48405000	26840000	2331200	32036000	22581000	1907300	7716900	8666700	10666000	32633000	13147000	3906300	2898000	6824400	914910	Bacteria;Cyanobacteria;unclassified;Oscillatoriales;unclassified;Trichodesmium;erythraeum;Trichodesmium erythraeum IMS101	Photosynthetic reaction centre protein.	KO:K02703	pfam00124
TCCM_0420.00000380	6023700	0	12294000	10479000	4070100	30874000	6102500	3696100	10030000	10960000	21474000	15506000	9945000	6687100	2046800	0	9039400	8388300	15917000	1303000	2685700	15801000	24507000	0	1320900	15113000	10149000	5783600	1998300	1776200	3747600	14885000	5877100	1910200	2151000	3948200	0	Bacteria;Cyanobacteria;unclassified;Oscillatoriales;unclassified;Trichodesmium;erythraeum;Trichodesmium erythraeum IMS101	Cytochrome b subunit of the bc complex	KO:K02635	pfam13631
TCCM_0203.00000070	5275200	2841800	5086600	4741300	6335900	13444000	2945600	1953100	3478300	4031500	12919000	9343700	3344800	4196700	2325200	5720700	4420900	10750000	5046500	1914400	2257900	12355000	9807500	12650000	7621200	7124100	3023700	8926700	7671800	270120	812470	5590000	6823400	5363200	1543600	3033300	2361700	Bacteria;Cyanobacteria;unclassified;Oscillatoriales;unclassified;Trichodesmium;erythraeum;Trichodesmium erythraeum IMS101	Delta-aminolevulinic acid dehydratase	KO:K01698	pfam00490
TCCM_0469.00000030	4607200	0	12131000	6867000	11585000	16235000	2731300	2787500	5032500	6311000	7036300	7886500	6592400	8068200	6723400	4555900	4269600	6828400	4599600	1725300	1747500	8100700	10705000	7114000	4302100	6932300	5612900	5557200	5221000	2020200	2363300	7324900	4939100	4223700	357520	615410	2547100	Bacteria;Cyanobacteria;unclassified;Oscillatoriales;unclassified;Trichodesmium;erythraeum;Trichodesmium erythraeum IMS101	Glycine/serine hydroxymethyltransferase	KO:K00600	pfam00464
TCCM_0466.00000020	17157000	7724800	20146000	19565000	18374000	37981000	7229800	6410700	11848000	12253000	13075000	25311000	10031000	14387000	12192000	13357000	7574400	20716000	4893200	3671700	5322200	11127000	12319000	23407000	11703000	10685000	6921800	12121000	17503000	2330000	2204100	8019900	10323000	12231000	1217400	3141500	4839400	Bacteria;Cyanobacteria;unclassified;Oscillatoriales;unclassified;Trichodesmium;erythraeum;Trichodesmium erythraeum IMS101	ATP-dependent Clp protease, proteolytic subunit ClpP	KO:K01358	pfam00574
TCCM_0058.00000260	3168900	5315300	6446500	6953400	10667000	15660000	2426100	954800	3161700	1494400	5879700	5241600	3587200	4869100	2548600	4191400	2796300	8905900	3302500	1198400	1263000	4132800	7375000	7327000	3066400	4696400	3199600	3219500	4010400	1231800	519870	4562300	2324500	2324200	2664600	6223400	3604600	Bacteria;Cyanobacteria;unclassified;Oscillatoriales;unclassified;Trichodesmium;erythraeum;Trichodesmium erythraeum IMS101	Predicted hydrolases or acyltransferases (alpha/beta hydrolase superfamily)		pfam12697
TCCM_0286.00000040	5762200	4771200	8276000	8600200	6586100	7601400	2362000	1502400	3554000	2424000	2812200	2659700	2388200	3688700	4333000	3184100	1766100	3436100	1023100	343090	230830	2023800	4181800	2415800	2195000	2250900	1917700	1609000	2707400	827180	516510	1232800	823840	1360000	680880	2269500	1552800	Bacteria;Cyanobacteria;unclassified;Oscillatoriales;unclassified;Trichodesmium;erythraeum;Trichodesmium erythraeum IMS101	5-methyltetrahydrofolate--homocysteine methyltransferase	KO:K00548	pfam02574
TCCM_0534.00000170	11577000	19274000	18505000	18885000	20286000	28993000	5343200	1829100	6574900	8451600	15234000	17346000	9803500	11522000	7252200	7866300	2215800	13577000	5237500	3785900	2683800	9502500	17178000	13290000	10231000	11320000	8103900	9782400	16054000	3442100	3792000	9537600	7251200	7020500	638740	4166800	1600900	Bacteria;Cyanobacteria;unclassified;Oscillatoriales;unclassified;Trichodesmium;erythraeum;Trichodesmium erythraeum IMS101	Glutamate-1-semialdehyde aminotransferase	KO:K01845	pfam00202
TCCM_0838.00000020	658980	4747900	5712500	6905700	5870300	8175400	1592600	626140	3898300	3530400	5602600	4794700	3706600	3869200	1401900	7277700	5194500	8626500	4041500	2464000	1322200	10930000	10543000	8449300	3264600	7457800	9349700	4492300	9167300	78018	416720	6264500	3028400	1919200	1416300	5228700	0	Bacteria;Cyanobacteria;unclassified;Chroococcales;unclassified;Cyanothece;sp.;Cyanothece sp. PCC 7425	3-hydroxy-3-methylglutaryl CoA synthase	KO:K01641	pfam08540
TCCM_0190.00000250	6587000	5431800	22203000	53363000	12810000	16646000	2454600	356850	508740	0	19660000	16305000	16512000	10890000	4812500	11744000	8237000	15641000	7357900	2110400	2435600	15690000	11504000	13778000	12239000	15660000	12401000	13188000	18841000	0	0	11028000	11621000	8305400	0	0	0
TCCM_0574.00000100	9192600	7561600	6708900	8378700	11192000	16168000	2995600	1979100	5164100	5646600	6475900	6526300	7335100	7422600	7725200	4269100	3401000	10505000	4265300	1296600	1367100	4984900	6903200	8021700	4457600	5416100	3405100	5115400	5079500	1279100	2194500	4239300	4219100	2793400	1584700	4907500	1737400	Bacteria;Cyanobacteria;unclassified;Oscillatoriales;unclassified;Trichodesmium;erythraeum;Trichodesmium erythraeum IMS101	argininosuccinate synthase	KO:K01940	pfam00764
TCCM_0339.00000010	11177000	0	12421000	0	13089000	24379000	4212600	3612700	6234500	2291700	22868000	16125000	7764400	7987800	0	9189600	6932900	15383000	5735200	2274100	3955700	12366000	23510000	25542000	15336000	5532500	9552000	11820000	17848000	1571600	1225200	17005000	10673000	6642900	2728700	6154400	8386400	Bacteria;Cyanobacteria;unclassified;Oscillatoriales;unclassified;Trichodesmium;erythraeum;Trichodesmium erythraeum IMS101	Uncharacterized proteins involved in stress response, homologs of TerZ and putative cAMP-binding protein CABP1	KO:K05795	pfam02342
TCCM_0176.00000170	5906400	4045900	11673000	8393300	10021000	16581000	2088000	1561300	3631700	3103300	4175900	3611400	2894000	3375400	3011600	2605300	2508700	5258500	1745500	638590	469240	2904600	5874700	3131100	2145000	3241300	2681500	2819700	2774600	1543400	1248200	2814400	1341600	1815700	1246800	2755200	1093700	Bacteria;Cyanobacteria;unclassified;Oscillatoriales;unclassified;Trichodesmium;erythraeum;Trichodesmium erythraeum IMS101	glycine betaine/L-proline transport ATP binding subunit	KO:K02000	pfam00005
TCCM_0578.00000090	2930900	8157700	11708000	8485400	21200000	31498000	3751200	3698300	13112000	12522000	1493400	4320400	13167000	16324000	3746700	4034200	3298900	7250700	4378400	601150	697500	5573800	10498000	5659100	1226100	6367500	3434700	1654600	5535000	6168100	2222100	3118300	1804900	1115300	416500	1741000	7305300	Bacteria;Cyanobacteria;unclassified;Chroococcales;unclassified;Cyanothece;sp.;Cyanothece sp. PCC 7822			pfam14765
TCCM_0197.00000150	1744600	4065600	7762500	4856000	4857200	13148000	2508400	0	550880	554750	7483100	7922500	4124300	5861600	3572400	2023900	1031400	4152200	1531500	1198000	1244500	2364200	5242600	4961600	5083300	3825200	1969500	5281600	5115600	449840	340860	2721900	3948800	4217100	6352800	12240000	3234600	Bacteria;Cyanobacteria;unclassified;Oscillatoriales;unclassified;Trichodesmium;erythraeum;Trichodesmium erythraeum IMS101	Archaeal fructose-1,6-bisphosphatase and related enzymes of inositol monophosphatase family	KO:K01092	pfam00459
TCCM_0017.00000060	10217000	10807000	8722200	9581700	19849000	34743000	4851900	3507300	9639000	8170100	11646000	10318000	11293000	11907000	5741300	8391800	6961500	12489000	6891600	2060500	2897000	11622000	16110000	17009000	6145300	10427000	6425400	5334900	8202400	2492900	2937000	8869600	4505800	5012900	3347700	8161200	3104800	Bacteria;Cyanobacteria;unclassified;Oscillatoriales;unclassified;Trichodesmium;erythraeum;Trichodesmium erythraeum IMS101	Ribosomal protein S9	KO:K02996	pfam00380
TCCM_0550.00000130	16266	6077900	2762100	6359700	3842000	9855400	1796100	1990900	2363600	312290	666170	1748300	303850	4513600	3048800	5008300	501850	892610	2212200	2091000	310690	1675100	2761200	658750	435220	2992100	1511200	415940	372000	929380	3343700	3842300	441620	493020	415470	5940300	1438900	Bacteria;Cyanobacteria;unclassified;Oscillatoriales;unclassified;Trichodesmium;erythraeum;Trichodesmium erythraeum IMS101	Rieske Fe-S protein	KO:K02636	pfam00355
TCCM_0690.00000410	67173000	64271000	65367000	52203000	70240000	144900000	20669000	12004000	26444000	27406000	51941000	75173000	47438000	57537000	21025000	36113000	26257000	55100000	25305000	15564000	9637900	62898000	93127000	88171000	37532000	67807000	47402000	58333000	70750000	14382000	40885000	48368000	22933000	17524000	2100500	9889300	7027400	Bacteria;Cyanobacteria;unclassified;Oscillatoriales;unclassified;Trichodesmium;erythraeum;Trichodesmium erythraeum IMS101	Glyceraldehyde-3-phosphate dehydrogenase/erythrose-4-phosphate dehydrogenase	KO:K00150	pfam02800
2503610523	8867000	15810000	10643000	15245000	18481000	30097000	5682400	1696200	3678100	8039800	20917000	17513000	8212100	12401000	5637400	9114600	2066500	13383000	4603600	4110100	2955000	8641500	14605000	13693000	10689000	8375300	7147600	11639000	12692000	3393600	4553300	6665800	6725000	8670000	1064600	3542100	790230
TCCM_0494.00000050	7864600	3689000	4129500	2344100	12368000	17948000	2229800	0	1838300	3693300	12884000	9862500	5725000	7314300	2184700	5323900	2996600	6101300	3527000	2273000	2827100	5089100	9637000	11540000	6424200	6032100	4581300	8012400	6315100	105350	376170	4180800	2956600	6068500	0	0	0	Bacteria;Cyanobacteria;unclassified;Oscillatoriales;unclassified;Trichodesmium;erythraeum;Trichodesmium erythraeum IMS101	ribosomal protein L6, bacterial type	KO:K02933	pfam00347
TCCM_0967.00000120	3509700	6938500	7649800	6815800	20307000	30252000	4627700	1142000	7682600	4212200	6985900	6891200	14264000	11001000	3103500	3672000	2843500	6575500	2470900	1369000	857660	3703400	7047400	5485500	5507700	3938600	2558200	6982900	6543400	2861800	1896000	2053700	2060100	2091900	1127500	1472900	5437000	Bacteria;Cyanobacteria;unclassified;Chroococcales;unclassified;Cyanothece;sp.;Cyanothece sp. PCC 7822	NADPH:quinone reductase and related Zn-dependent oxidoreductases		pfam08659
TCCM_0253.00000010	3042900	4644700	4197300	5201200	6038700	11568000	1391300	733130	3756600	2155900	4786500	2093100	1292400	1274100	1678300	2219100	2157400	4144800	2393800	468320	780780	3174400	6897400	2650600	4583600	3326700	3390400	4228800	4939000	94027	119870	2973200	1778100	1980900	0	686130	0	Bacteria;Cyanobacteria;unclassified;Oscillatoriales;unclassified;Trichodesmium;erythraeum;Trichodesmium erythraeum IMS101	3-deoxy-D-arabino-heptulosonate 7-phosphate (DAHP) synthase	KO:K03856	pfam00793
TCCM_0320.00000020	1929700	4989900	6515300	3331200	6045600	15808000	1423000	0	1892100	1616700	3791400	3794400	3386100	2470200	1710900	822730	2058200	2989700	1398300	778700	496380	1883600	5265400	1204000	790460	3485000	2154500	3558800	4095000	69222	0	1922700	988880	1520100	416000	1353300	0	Bacteria;Cyanobacteria;unclassified;Oscillatoriales;unclassified;Trichodesmium;erythraeum;Trichodesmium erythraeum IMS101	Aminopeptidase N	KO:K01256	pfam01433
TCCM_0493.00000020	5531900	1540800	2546200	3759500	13857000	13192000	1763600	887550	1225300	1796000	11304000	13669000	3869000	10083000	4968000	4972200	4341000	7590000	1008900	2413000	3039300	4094900	7610200	9551800	9936000	3236100	1837000	15691000	11375000	1091600	722310	3638100	8536400	5972400	135900	1049800	1382400	Bacteria;Cyanobacteria;unclassified;Oscillatoriales;unclassified;Trichodesmium;erythraeum;Trichodesmium erythraeum IMS101	Molecular chaperone GrpE (heat shock protein)	KO:K03687	pfam01025
TCCM_0395.00000110	5066100	6717500	6877500	4870600	8340600	12971000	2495600	613650	3435500	814570	4804800	4531200	4752300	4505500	4806700	4456400	2595900	6340000	3203000	1222800	1477200	4690200	8138900	6371700	4184000	4887800	3333000	4475900	6148400	580930	485940	4201300	2360400	2534600	772740	1283400	2114900	Bacteria;Cyanobacteria;unclassified;Oscillatoriales;unclassified;Trichodesmium;erythraeum;Trichodesmium erythraeum IMS101	Glutamate dehydrogenase/leucine dehydrogenase	KO:K00262	pfam00208
TCCM_0546.00000140	7401400	2417500	2822700	4614300	12481000	20810000	3492300	1503300	7509700	6873300	15974000	13218000	6368300	7808800	5516300	6377500	5397000	14601000	2889000	2736700	4155500	5083300	9155900	13338000	9596600	5678000	4121900	8958200	8877100	2260100	2617600	5732900	6308000	6768500	3534300	8171500	10825000	Bacteria;Cyanobacteria;unclassified;Oscillatoriales;unclassified;Trichodesmium;erythraeum;Trichodesmium erythraeum IMS101	Pyruvate/2-oxoglutarate dehydrogenase complex, dihydrolipoamide dehydrogenase (E3) component, and related enzymes	KO:K00383	pfam07992
TCCM_0579.00000020	11009000	8055900	5006100	7709500	17303000	29755000	5376800	3138700	6444500	5702200	24418000	27960000	10549000	16361000	10536000	11621000	8725500	20975000	6343900	4853200	6429700	6628400	9091600	24866000	13901000	8777400	4482900	15292000	18345000	2302700	1945600	9308300	17162000	13532000	1560000	6185400	6023600	Bacteria;Cyanobacteria;unclassified;Oscillatoriales;unclassified;Trichodesmium;erythraeum;Trichodesmium erythraeum IMS101	Peroxiredoxin		pfam00578
TCCM_0824.00000030	1432800	2372000	5487200	5623600	6358600	7747600	1531900	1856100	4877600	4208600	12347000	9095800	1722300	1289700	2095900	6783000	5570600	10181000	5225800	2512200	2071500	10212000	19438000	9608600	6736100	8950400	6114400	7545900	6048000	0	1209400	7745800	4410600	4519900	1283900	2688700	2225100	Bacteria;Cyanobacteria;unclassified;Oscillatoriales;unclassified;Trichodesmium;erythraeum;Trichodesmium erythraeum IMS101	Spermidine synthase	KO:K00797	pfam01564
TCCM_0180.00000030	2078100	6313200	4675900	4869900	6963800	10132000	2094200	1131300	3254500	2979900	1488200	1073300	1984100	1768900	3193600	2023100	1632600	4809500	1745400	258560	219260	2206800	3804800	1436900	650940	2864600	1766700	2462700	2146700	763300	572180	2533900	701750	860970	1101100	2485500	1134300	Bacteria;Cyanobacteria;unclassified;Oscillatoriales;unclassified;Trichodesmium;erythraeum;Trichodesmium erythraeum IMS101	delta-1-pyrroline-5-carboxylate dehydrogenase, group 2, putative	KO:K00318	pfam00171
TCCM_0334.00000150	6307900	8938300	15755000	13389000	12498000	21551000	3924500	2934700	6036000	6288000	17775000	17745000	6944200	7738700	5114900	5666500	5442000	15783000	3102600	3480700	3224600	7422300	12188000	14908000	10824000	6992300	4249500	10225000	13067000	2343000	964760	6090900	6539400	8100500	552060	4356700	4609700	Bacteria;Cyanobacteria;unclassified;Oscillatoriales;unclassified;Trichodesmium;erythraeum;Trichodesmium erythraeum IMS101	Pyruvate/2-oxoglutarate dehydrogenase complex, dihydrolipoamide dehydrogenase (E3) component, and related enzymes	KO:K00383	pfam02852
TCCM_0046.00000300	12230000	5356200	10676000	9693600	19486000	29665000	4169800	3739500	4934100	11344000	15535000	18714000	8970300	9698300	10997000	7621900	8806900	17008000	5674200	4400300	6290400	8427300	21462000	23861000	10151000	8609900	8888000	9291900	13848000	2817200	2737600	11025000	13913000	2949500	2859700	9047000	7681200	Bacteria;Cyanobacteria;unclassified;Oscillatoriales;unclassified;Trichodesmium;erythraeum;Trichodesmium erythraeum IMS101	Uncharacterized proteins involved in stress response, homologs of TerZ and putative cAMP-binding protein CABP1	KO:K05795	pfam02342
TCCM_0082.00000040	1872600	5646800	11312000	14780000	13065000	21245000	3595400	1593000	4680600	4009400	737150	476550	7382300	9408500	4991100	4345400	2700500	7666100	3945400	1016100	408110	3767400	10094000	1275800	1317100	5702000	3510500	2749100	409870	1163500	516030	6228900	713590	1450600	1986000	4142900	0	Bacteria;Cyanobacteria;unclassified;Oscillatoriales;unclassified;Trichodesmium;erythraeum;Trichodesmium erythraeum IMS101	Predicted nucleoside-diphosphate-sugar epimerases		pfam13460
TCCM_0142.00000260	2191400	3157300	3719800	4192000	7361200	12331000	1751100	264230	3581400	1682300	2131600	2556600	3016100	5084200	1888800	2374900	1708400	3376200	2765400	764810	1009000	3076000	5877100	1965900	2543300	3040300	1791300	3252200	1824900	1523700	544170	3393100	1166900	1325200	924080	2621100	4799200	Bacteria;Cyanobacteria;unclassified;Oscillatoriales;unclassified;Trichodesmium;erythraeum;Trichodesmium erythraeum IMS101
TCCM_0294.00000230	4532400	3705100	2752100	4648500	9513700	10575000	2097900	1282200	3814700	2061600	6089800	7352900	2529700	3356300	3131700	2341400	2899800	5832900	1791800	980500	2017400	4376200	8147100	8260700	3720800	5495300	2200800	5763600	4363500	484230	214430	2801200	5713500	4191300	0	0	1308100	Bacteria;Cyanobacteria;unclassified;Oscillatoriales;unclassified;Trichodesmium;erythraeum;Trichodesmium erythraeum IMS101	ribosome recycling factor	KO:K02838	pfam01765
TCCM_0313.00000020	3099900	3148600	4149100	2010000	3905000	10082000	1488200	755680	2338200	1398500	4273600	4565600	2430000	3025100	2779100	1994900	1836700	3587800	2034000	540360	638920	2755300	4786900	4097100	2323300	2606000	2545400	2721200	3589100	593960	604280	2729200	1025400	1531300	1212000	2576000	1670500	Bacteria;Cyanobacteria;unclassified;Oscillatoriales;unclassified;Trichodesmium;erythraeum;Trichodesmium erythraeum IMS101	DNA-directed RNA polymerase, beta'''' subunit	KO:K03046	pfam04998
TCCM_0040.00000050	1718400	2164200	2499300	2834300	8749800	10419000	1522800	883500	2271300	3747300	8773900	6556800	3535300	3139000	1969400	4536100	1994000	6147500	2443300	1270000	1351600	4126500	5080700	7459800	4671200	3284800	2483300	5144000	6300300	750780	334870	3361600	1948300	3458900	1663400	2610500	2398600	Bacteria;Cyanobacteria;unclassified;Oscillatoriales;unclassified;Trichodesmium;erythraeum;Trichodesmium erythraeum IMS101	NADH dehydrogenase, FAD-containing subunit	KO:K03885	pfam07992
TCCM_0486.00000170	0	0	1695100	0	23036000	26904000	7769300	2554900	2170800	9504900	1812500	0	27124000	59083000	0	8944500	10369000	17619000	1275000	12670000	19129000	0	3722900	1656200	810140	2630900	6702400	1920700	4292100	16962000	73971000	0	2375800	723240	0	1395600	0	Bacteria;Cyanobacteria;unclassified;Oscillatoriales;unclassified;Trichodesmium;erythraeum;Trichodesmium erythraeum IMS101	Phycobilisome protein.		pfam00502
TCCM_0017.00000110	0	1733900	3013800	716290	1267100	972660	37701	0	42797	40249	630970	888240	161830	265870	2604100	0	0	520060	0	178860	79846	0	278980	623100	259470	791290	401790	224810	502730	0	0	57823	246740	235990	0	587990	0	Bacteria;Cyanobacteria;unclassified;Oscillatoriales;unclassified;Trichodesmium;erythraeum;Trichodesmium erythraeum IMS101	ribosomal protein L17	KO:K02879	pfam01196
TCCM_0158.00000190	3625200	4323800	9484900	5744100	9578900	8745700	2318100	1836600	1391000	2439600	6906300	5183700	2830100	3066100	4065100	3451500	1159500	4790500	2792400	1249900	1415100	3615200	6042900	6339100	4086000	4994500	2036800	3565600	3263800	1286000	1581500	3776400	2012900	5052600	865700	2434800	1306800	Bacteria;Cyanobacteria;unclassified;Oscillatoriales;unclassified;Trichodesmium;erythraeum;Trichodesmium erythraeum IMS101	daunorubicin resistance ABC transporter ATP-binding subunit	KO:K09687	pfam00005
TCCM_0206.00000020	3873400	3392900	9061900	7050800	7734700	11775000	2340600	886680	690640	2073800	6130700	5889900	3280000	3918400	2972900	2055400	2006600	3589200	2428600	1046100	899210	6509400	4158600	5626900	3417400	3018900	1969300	3894100	4393500	1147800	1766600	2369300	2140100	2949700	875620	2673900	1649100	Bacteria;Cyanobacteria;unclassified;Oscillatoriales;unclassified;Trichodesmium;erythraeum;Trichodesmium erythraeum IMS101	cell division protein FtsZ	KO:K03531	pfam12327
TCCM_0031.00000100	4666900	1833700	3099000	4977900	3868000	8685400	991420	336340	2260900	2878200	6772900	6467000	2566600	2499900	1349500	2451100	2406800	4873900	4016200	1182900	1836400	6262400	9008500	7761400	5483800	5841900	4071000	5240000	6177100	353780	389670	5525000	3947200	3750600	343750	1747600	3919300	Bacteria;Cyanobacteria;unclassified;Oscillatoriales;unclassified;Trichodesmium;erythraeum;Trichodesmium erythraeum IMS101	Tic22-like family.		pfam04278
TCCM_0619.00000290	22906000	13105000	14067000	14153000	29223000	39968000	8049700	3232800	10487000	11100000	24685000	25868000	10196000	14721000	10232000	10932000	8706100	25509000	3679100	3811000	4478800	5117400	11515000	20395000	14619000	6768100	4434300	16705000	18716000	1678400	2974600	5939800	8122900	8049400	3576800	9192900	9207800	Bacteria;Cyanobacteria;unclassified;Oscillatoriales;unclassified;Trichodesmium;erythraeum;Trichodesmium erythraeum IMS101	Ribosomal protein S1	KO:K02945	pfam00575
TCCM_0038.00000020	10199000	6557500	9297100	13719000	9852900	20424000	3855600	1795900	2254200	4086200	5450900	4554400	6190200	7609100	6516200	4093800	1766200	7392600	4591000	490420	851500	3917600	5655400	5382500	2949400	3813400	2529500	4491200	4115100	2505300	521790	5868400	3717200	2493100	496580	2726700	5688000	Bacteria;Cyanobacteria;unclassified;Oscillatoriales;unclassified;Trichodesmium;erythraeum;Trichodesmium erythraeum IMS101	6-phosphogluconolactonase	KO:K01057	pfam01182
TCCM_0796.00001540	0	0	0	0	4494800	2640000	216700	3176800	3976500	7077200	50409000	76514000	323180	1810200	0	10095000	14536000	20147000	15886000	1267300	2226000	35840000	27494000	34281000	32312000	18305000	21225000	9331600	15449000	0	0	25461000	11353000	14281000	0	0	0
TCCM_0163.00000250	7715800	7196200	13504000	9598500	21132000	26199000	5506000	3523200	8825800	6878600	9411100	7863200	10788000	7826200	9156600	4729000	3123100	7818700	5057800	1763300	1897300	6744000	7953200	9754600	6212200	8723300	7741300	8045600	10191000	3462700	1766500	5864800	3440200	4738300	1933400	4339000	1826400	Bacteria;Cyanobacteria;unclassified;Oscillatoriales;unclassified;Trichodesmium;erythraeum;Trichodesmium erythraeum IMS101	Carbonic anhydrases/acetyltransferases, isoleucine patch superfamily	KO:K08698	pfam00101
TCCM_0025.00000060	10038000	22036	0	0	26997000	31938000	4679900	6366700	10566000	8562100	22816000	20183000	5537000	8594700	2672700	13725000	9956200	14205000	4629600	3705500	5541000	9596600	13850000	10509000	5353600	3755300	3233800	8774100	9457800	7328000	4030500	14956000	6245100	8977000	0	2403100	0	Bacteria;Cyanobacteria;unclassified;Oscillatoriales;unclassified;Trichodesmium;erythraeum;Trichodesmium erythraeum IMS101	Photosystem I psaA/psaB protein.	KO:K02689	pfam00223
TCCM_0062.00000430	8151100	8495000	30040000	24222000	7687300	8933100	1657000	1371000	871840	3537000	7650000	6682500	2506500	2926700	17711000	4132600	1684300	5437900	3423400	2200700	1805300	8537800	17406000	10307000	7917000	11215000	5258800	6305100	10600000	141870	0	9740100	5317300	3976000	0	0	0	Bacteria;Cyanobacteria;unclassified;Chroococcales;unclassified;Cyanothece;sp.;Cyanothece sp. PCC 8801	Uridylate kinase		pfam00696
TCCM_0173.00000190	0	2847900	5612300	6576100	5850900	9033800	2057000	320230	2509800	4130700	3217600	2682600	2726400	3938400	2467800	3278400	2212200	3249600	1265400	1134800	521030	2722600	3993200	2677000	2135000	2766000	1844200	2789300	3707600	830000	1187200	1751200	1927700	2621000	1127200	2690900	1690700	Bacteria;Cyanobacteria;unclassified;Oscillatoriales;unclassified;Trichodesmium;erythraeum;Trichodesmium erythraeum IMS101	glycine cleavage system T protein	KO:K00605	pfam01571
TCCM_0518.00000010	4997700	0	0	0	9122500	25214000	1652200	1851400	3786200	3201700	13107000	10893000	4294000	4466400	0	3715600	3763000	11520000	2525500	3372100	3277300	5347600	7363600	13457000	7890000	3969600	2675000	9056500	11532000	561850	382520	4233400	4803600	7296400	449220	1989600	2131900	Bacteria;Cyanobacteria;unclassified;Oscillatoriales;unclassified;Trichodesmium;erythraeum;Trichodesmium erythraeum IMS101	ribosomal protein L29	KO:K02904	pfam00831
TCCM_0959.00000070	3562900	3749700	8076600	9042200	5836700	9056700	1585600	2550700	2485500	2090700	5834500	5375000	3030300	2538300	4863000	3309900	2921800	5821300	2683900	1081300	1125700	3516500	5825000	4801800	3473100	3643000	2584200	3400500	5145300	397910	768900	3898600	4208100	2605000	518250	1367100	657580	Bacteria;Cyanobacteria;unclassified;Oscillatoriales;unclassified;Trichodesmium;erythraeum;Trichodesmium erythraeum IMS101	methyltransferase, FkbM family		pfam05050
TCCM_0064.00000070	5344600	4466200	6664600	6669100	7131500	9743500	1659200	1173300	2672500	2626600	4344200	3791900	2306300	2961000	2842000	3207300	2506400	4466300	2591200	791390	855290	4302800	6347900	3735900	2487000	3526600	2536700	2553600	3011300	576810	963640	3180200	2030200	1875600	1032700	2625900	1187200	Bacteria;Cyanobacteria;unclassified;Oscillatoriales;unclassified;Trichodesmium;erythraeum;Trichodesmium erythraeum IMS101	glycine dehydrogenase (decarboxylating)	KO:K00281	pfam02347
TCCM_0414.00000100	4655700	8845500	5005500	4066800	8467500	12327000	2092600	2014100	4029600	5979900	9784800	8865400	6813700	5852400	2424500	7648000	3469300	7365100	7430000	1941800	1379300	13705000	21881000	6435100	6571100	13724000	11157000	7354000	10315000	749790	2171400	9511900	3452400	5532200	1212400	3073000	0	Bacteria;Cyanobacteria;unclassified;Nostocales;Nostocaceae;Nostoc;punctiforme;Nostoc punctiforme PCC 73102	Polyketide synthase modules and related proteins		pfam00109
TCCM_0627.00000220	4498200	12029000	15992000	15369000	19262000	26943000	6251100	3789100	8507900	7271200	11391000	12418000	9496300	8413900	4321800	9195000	7055000	15410000	6443400	2152000	1763600	10656000	17691000	16805000	5778900	10222000	8282600	7016500	9209600	769410	1891400	8312000	6289300	4417100	1611900	4178700	981950	Bacteria;Cyanobacteria;unclassified;Oscillatoriales;unclassified;Trichodesmium;erythraeum;Trichodesmium erythraeum IMS101	Dehydrogenases with different specificities (related to short-chain alcohol dehydrogenases)	KO:K00059	pfam00106
TCCM_0454.00000200	0	2858400	3784800	3669400	9458300	8395200	1798000	0	1336000	1474500	10572000	6923000	2975200	3043500	333980	3953600	2173000	5360700	231530	1527900	1866200	771850	1096500	5720300	3787900	2190100	404700	4937300	5242900	55099	0	1282700	1622400	2540100	0	669030	631690	Bacteria;Cyanobacteria;unclassified;Oscillatoriales;unclassified;Trichodesmium;erythraeum;Trichodesmium erythraeum IMS101	NADH-plastoquinone oxidoreductase subunit I protein	KO:K05580	pfam13237
TCCM_0705.00000170	8193800	8936400	6874400	11527000	17275000	28911000	4778500	4187400	7240600	8243100	8225200	7561400	6778800	9320300	9271500	7588400	5764500	13006000	4165700	1816900	2019400	7824400	12079000	12643000	5024400	9045100	5038000	5298100	5576200	1817600	2159100	6789300	3476200	3893200	2461800	7658500	5963800	Bacteria;Cyanobacteria;unclassified;Oscillatoriales;unclassified;Trichodesmium;erythraeum;Trichodesmium erythraeum IMS101	Response regulators consisting of a CheY-like receiver domain and a winged-helix DNA-binding domain	KO:K11329	pfam00072
TCCM_0682.00000130	11837000	693240	2378900	2763200	15974000	20179000	5468200	1780200	7077600	5825100	18998000	18325000	6018200	9639400	9311700	5263500	4970600	10439000	3647200	3523900	4566800	4043800	11567000	11696000	11158000	7740300	4721500	12547000	12386000	985980	1308000	3949200	8604900	7787200	1933300	2293300	2848400	Bacteria;Cyanobacteria;unclassified;Oscillatoriales;unclassified;Trichodesmium;erythraeum;Trichodesmium erythraeum IMS101	ribosomal protein L14, bacterial/organelle	KO:K02874	pfam00238
TCCM_0826.00000030	1673300	2407400	3288100	7450700	5176100	7440700	1215000	1137500	839760	668040	1557900	852530	4582800	3441400	1660600	2769000	1256200	2613600	111380	1465200	917090	229260	967360	5221500	565620	1026100	629660	3845900	4899900	714500	385190	692010	3003200	492510	1359400	6071800	1502000	Bacteria;Cyanobacteria;unclassified;Oscillatoriales;unclassified;Trichodesmium;erythraeum;Trichodesmium erythraeum IMS101	FKBP-type peptidyl-prolyl cis-trans isomerases 1	KO:K01802	pfam00254
TCCM_0438.00000020	2918400	9268200	11306000	10403000	7908100	9764700	1978300	1150800	774960	3518800	1612900	3321400	3037000	1998200	6486000	3002700	753230	5207200	3954100	1235300	1067000	8208900	8204800	2521900	2057000	5070700	3626100	3708900	4111600	767810	1247700	4990500	2130100	1799800	570190	1727300	471500	Bacteria;Cyanobacteria;unclassified;Oscillatoriales;unclassified;Trichodesmium;erythraeum;Trichodesmium erythraeum IMS101	Putative GTPases (G3E family)		pfam02492
TCCM_0033.00000450	3398500	8754600	7980100	9882900	12952000	20904000	2886400	1625500	2792200	3689100	6420000	7066400	4980300	4855600	3722000	3679100	3112300	6184800	3875700	1879900	1652300	2559800	4274900	5974100	4545600	2798600	3125200	6141100	8030500	1658100	276220	3012400	3428400	2540700	1487500	3632400	4873200	Bacteria;Cyanobacteria;unclassified;Oscillatoriales;unclassified;Trichodesmium;erythraeum;Trichodesmium erythraeum IMS101	Predicted solute binding protein		pfam13385
TCCM_0116.00000020	7597400	9711700	11748000	14677000	16222000	21769000	3996200	2306600	5552000	7680500	9285600	9546500	6505900	5903300	5395400	6648100	5213000	12457000	3880300	1719800	1419200	7048000	12158000	10798000	5232200	8853200	5492400	6948700	7845900	1432900	2875900	6882300	4465900	4320400	2882500	6470600	2147700	Bacteria;Cyanobacteria;unclassified;Oscillatoriales;unclassified;Trichodesmium;erythraeum;Trichodesmium erythraeum IMS101	Uncharacterized protein related to plant photosystem II stability/assembly factor		pfam14870
TCCM_0576.00000160	2699400	6658100	3642000	4787200	6239800	18046000	1863200	6758900	21170000	19810000	6796200	9928100	2284200	1521100	1773400	33189000	27072000	40087000	12610000	9301200	7897100	12994000	19020000	37989000	21055000	20108000	7273600	17559000	16623000	0	3648300	19685000	22543000	4452900	1182800	0	0	Bacteria;Firmicutes;Clostridia;Clostridiales;Clostridiaceae;Clostridium;sporogenes;Clostridium sporogenes ATCC 15579	H-type lectin domain.		pfam09458
2503739191	21476000	12991000	18386000	23761000	35785000	47008000	8239500	4923300	8681000	9474000	25326000	22884000	14610000	19685000	13782000	11987000	8141400	16309000	5999900	4594400	3524000	11340000	17775000	18316000	14455000	9747100	8599400	15227000	22564000	3498500	4297400	9124800	10902000	14070000	6628700	11166000	16945000
TCCM_0289.00000050	2947500	6210300	8665700	5418400	7864300	11885000	2038600	835060	2530600	971890	1339000	1505800	2540100	3801700	6162900	2043700	1102400	3549600	604510	674440	725650	3020100	2923200	2206600	1220900	1673800	685790	1017300	1851100	749900	272530	2041300	1742400	45930	702620	1101600	621810	Bacteria;Cyanobacteria;unclassified;Oscillatoriales;unclassified;Trichodesmium;erythraeum;Trichodesmium erythraeum IMS101	GTP-binding protein TypA/BipA	KO:K06207	pfam00009
TCCM_0525.00000030	1094800	86744	1046400	518500	1305300	796270	155090	735620	3001200	2886900	4635100	3683400	923590	1013000	0	3949400	2970700	6259300	5082800	571560	972460	7222200	12405000	4770200	2717500	7200800	5116300	2530800	3445900	0	387040	6919900	2636500	2020800	663750	166550	0	Bacteria;Cyanobacteria;unclassified;Chroococcales;unclassified;Acaryochloris;marina;Acaryochloris marina MBIC11017	histidinol dehydrogenase	KO:K00013	pfam00815
TCCM_0004.00005580	32716000	30719000	94168000	110150000	35118000	73647000	19443000	17244000	0	22610000	7013500	2414000	43997000	33374000	32177000	35863000	25658000	53429000	29279000	2332300	1503700	44241000	84239000	64720000	3438900	55405000	48721000	0	2429100	11070000	38596000	62308000	29086000	6355800	0	22866000	26140000	Bacteria;Cyanobacteria;unclassified;Oscillatoriales;unclassified;Trichodesmium;erythraeum;Trichodesmium erythraeum IMS101	Glutamine synthetase	KO:K01915	pfam00120
TCCM_0690.00000010	462080	1887300	2613100	2809200	4106300	6173400	1161500	125810	1907500	1161000	3049300	2929900	3050600	3289000	1540100	1901100	997620	2892000	286910	396650	437740	182360	937790	2482000	1850700	1158600	211980	1932000	2586100	379490	259420	428750	1345900	1862300	361260	1526700	2867700	Bacteria;Cyanobacteria;unclassified;Oscillatoriales;unclassified;Trichodesmium;erythraeum;Trichodesmium erythraeum IMS101	Predicted dehydrogenases and related proteins	KO:K00540	pfam01408
TCCM_0116.00000280	1944300	382700	2048300	1939600	31883000	38747000	6097200	5111700	4877500	8837800	15052000	8650400	8404100	8404300	2438400	9271000	6732900	9743600	5435200	20775000	6533600	4988700	10201000	14422000	11433000	5407800	6586100	15205000	9734900	1970800	1159500	6171600	8906000	8137500	9550200	8697200	0	Bacteria;Cyanobacteria;unclassified;Oscillatoriales;unclassified;Trichodesmium;erythraeum;Trichodesmium erythraeum IMS101	Gas vesicle protein.		pfam00741
TCCM_0575.00000030	4148300	3419700	10293000	6491300	6267100	5645400	1548500	1495600	2183400	2338600	3531900	6015700	2028500	2938200	5116000	1950300	1846300	3124900	1043400	1080600	869260	3178400	4417000	5951000	1818300	2583700	1322700	3512000	3295000	218240	211840	2900100	2474700	1860900	751830	2651300	718830	Bacteria;Cyanobacteria;unclassified;Oscillatoriales;unclassified;Trichodesmium;erythraeum;Trichodesmium erythraeum IMS101	Predicted Zn-dependent peptidases		pfam05193
TCCM_0522.00000030	3542000	1814200	2267200	2877300	2624300	4442700	452170	1039800	2103500	2768700	5139600	4578500	757340	734130	1086100	3347400	1833300	4746200	2361400	1269900	1100500	2475000	5119000	3050700	2524100	3029800	2082200	3288700	3384400	0	514660	3154100	2501300	3052400	338640	0	0	Bacteria;Proteobacteria;Gammaproteobacteria;Thiotrichales;Thiotrichaceae;Beggiatoa;sp.;Beggiatoa sp. PS	putative oxygen-independent coproporphyrinogen III oxidase		pfam04055
TCCM_0123.00000020	2284700	2168400	2695300	2711300	6322800	8208900	1280900	599540	1461100	650810	4753800	3690600	2315900	3372400	1283900	2139700	1532100	4319100	1766000	704100	726840	2448600	3988600	3111000	2467000	2797700	1875300	3803400	3582500	348140	775760	2157700	1547500	1408300	1028000	2148000	1745600	Bacteria;Cyanobacteria;unclassified;Oscillatoriales;unclassified;Trichodesmium;erythraeum;Trichodesmium erythraeum IMS101	Phenylalanyl-tRNA synthetase beta subunit	KO:K01890	pfam03147
TCCM_0256.00000030	3402400	2415600	4525900	3873400	6980600	8830000	1838500	1016200	1194600	3160400	5190200	3613000	3376600	3189100	5967100	2562600	2285800	4451800	1968200	664460	807890	4182500	6335800	3842100	2819700	4032200	2783500	2610700	4511900	435590	124210	3396700	2675900	3502600	170210	618030	5404800	Bacteria;Cyanobacteria;unclassified;Oscillatoriales;unclassified;Trichodesmium;erythraeum;Trichodesmium erythraeum IMS101	dihydrodipicolinate synthase	KO:K01714	pfam00701
TCCM_0570.00000140	5223700	4910300	8991900	8963200	7968200	21165000	3467500	682630	4453800	5724500	3522200	7377800	4818700	5369800	3428400	2831000	3629400	7902100	7706700	1133000	773080	9512500	9555700	7827300	505370	9924200	6764700	3023800	1294700	2350700	3600600	8494000	4573600	3289000	3831000	11503000	1675100	Bacteria;Cyanobacteria;unclassified;Oscillatoriales;unclassified;Trichodesmium;erythraeum;Trichodesmium erythraeum IMS101		KO:K09969
TCCM_0117.00000430	4614700	1473700	6036300	8665900	8950900	13877000	1844900	1490200	3446400	2915900	2550600	2930900	5330100	5734700	2745200	3314200	3471400	7935900	1396100	1292700	1432400	2143600	4146200	5751400	2934800	2998800	1885100	1963500	5680800	201960	70565	2590000	2935800	2450100	308930	1767500	2801200	Bacteria;Cyanobacteria;unclassified;Oscillatoriales;unclassified;Trichodesmium;erythraeum;Trichodesmium erythraeum IMS101	Serine/threonine protein phosphatase		pfam13672
TCCM_0711.00001340	16964000	16913000	23204000	8158300	13307000	28999000	3727700	4396700	6075600	4535800	8036300	12352000	6593100	8587100	9393200	6258200	4088900	11199000	11222000	3554900	2597700	10960000	21973000	8442100	6129000	15894000	8633000	11521000	5598800	2052700	5050100	13430000	6660400	3068600	1662900	5420900	261190	Bacteria;Cyanobacteria;unclassified;Oscillatoriales;unclassified;Trichodesmium;erythraeum;Trichodesmium erythraeum IMS101	Fructose-1,6-bisphosphatase	KO:K03841	pfam00316
TCCM_0464.00000030	515770	1633500	2342500	2389900	3907400	1041600	1053100	1468600	2088300	872030	11985000	12766000	3109900	2341000	508520	6177400	3331900	10605000	6350500	2746600	2729600	10939000	20968000	9311000	12575000	15364000	12096000	9655700	9133100	0	1652100	11062000	5285100	6098400	250600	0	0	Bacteria;Cyanobacteria;unclassified;Nostocales;Nostocaceae;Nostoc;sp.;Nostoc sp. PCC 7120	Predicted iron-dependent peroxidase		pfam04261
TCCM_0420.00000160	2630400	0	3566800	1647400	15037000	24690000	4225300	2317700	6420100	3763000	13353000	12095000	5745000	6553500	2751000	5861100	4594600	11170000	5851000	2268800	2724300	11242000	11397000	11383000	8925300	10971000	5753900	7616200	9111500	1183100	1327800	8241300	4423700	7292000	562600	547700	3439300	Bacteria;Cyanobacteria;unclassified;Oscillatoriales;unclassified;Trichodesmium;erythraeum;Trichodesmium erythraeum IMS101	ribosomal protein L9	KO:K02939	pfam01281
TCCM_0353.00000520	627990	0	685010	1130100	1581100	2583300	0	1216300	1854500	2536400	1055400	4666100	0	240940	0	6791400	3849400	11362000	8515200	584670	1332700	8338700	8600000	5119800	2076400	4578300	4061200	2171500	4445400	152800	2249500	11571000	7799500	2197800	0	4761200	0	Bacteria;Cyanobacteria;unclassified;Nostocales;Nostocaceae;Nodularia;spumigena;Nodularia spumigena CCY9414	Choline dehydrogenase and related flavoproteins		pfam13450
TCCM_0942.00001840	0	0	709760	672060	6877600	10486000	1785700	0	0	231010	2539500	244230	9923300	23930000	0	2631400	1208200	3110400	715250	15351000	21471000	287020	5151400	339620	0	895540	5761100	1717300	2222600	1225500	33990000	0	3788200	1701800	0	0	0		Gluconolactonase		pfam07676
TCCM_0109.00000020	2020600	3529900	6992600	4955200	9576600	16557000	3226800	0	4280500	1800700	10143000	8867300	4492500	4921100	1879500	3990500	3554700	7596200	3071700	1411500	1783100	4553600	9574400	7510100	6375200	3867900	3553000	5319900	7232100	1750000	1335400	3994400	2744300	3330300	3169800	5805600	6176600	Bacteria;Cyanobacteria;unclassified;Oscillatoriales;unclassified;Trichodesmium;erythraeum;Trichodesmium erythraeum IMS101	Predicted nucleoside-diphosphate-sugar epimerases		pfam05368
TCCM_0908.00000010	0	0	0	0	0	0	0	0	0	0	0	0	0	35751000	0	0	0	0	0	0	0	0	0	0	0	18844000	0	0	0	0	2942600	27242000	0	0	0	0	0	Bacteria;Cyanobacteria;unclassified;Oscillatoriales;unclassified;Trichodesmium;erythraeum;Trichodesmium erythraeum IMS101	Fructose-1,6-bisphosphatase/sedoheptulose 1,7-bisphosphatase and related proteins	KO:K11532	pfam03320
TCCM_0155.00000370	0	0	0	106120000	113560000	236300000	44194000	0	0	0	113370000	0	58833000	83446000	0	69801000	53465000	122530000	57004000	23453000	31345000	0	124810000	114310000	95360000	79637000	48842000	69360000	80319000	18108000	44548000	0	46939000	53585000	0	38919000	0	Bacteria;Cyanobacteria;unclassified;Oscillatoriales;unclassified;Trichodesmium;erythraeum;Trichodesmium erythraeum IMS101	Phycobilisome protein.	KO:K02093	pfam00502
TCCM_0161.00000260	17430000	19558000	25821000	30337000	29449000	66284000	12638000	3190500	0	8721100	1736900	819850	8274200	22073000	19059000	11247000	6046200	4051500	13832000	1077000	532650	17186000	28275000	64002	0	15993000	10061000	532560	292140	337670	1876800	15590000	547620	1877500	8794000	9390200	1326900	Bacteria;Cyanobacteria;unclassified;Oscillatoriales;unclassified;Trichodesmium;erythraeum;Trichodesmium erythraeum IMS101	F0F1-type ATP synthase, subunit a	KO:K02108	pfam00119
TCCM_0024.00000040	4045900	3624500	4013200	3904100	4335000	4836200	1058700	0	1679100	265830	2202500	2241100	2308600	2250700	2468100	1657100	807420	4018600	136240	368760	464010	689640	1797300	2320800	1541500	1222200	270590	1837000	1724900	78934	230580	928220	891920	1300100	853390	2188500	2031500	Bacteria;Cyanobacteria;unclassified;Oscillatoriales;unclassified;Trichodesmium;erythraeum;Trichodesmium erythraeum IMS101	Glutamate synthase domain 2	KO:K00284	pfam01645
TCCM_0467.00005930	0	0	0	0	1203000	1405900	328670	3317500	0	0	12266000	15537000	504710	1745100	0	8526000	5421200	14652000	12293000	8189700	7513000	9861600	16276000	17911000	11021000	26776000	3741000	6179100	19716000	0	1246400	23985000	11886000	8490000	2441200	0	0	Bacteria;Proteobacteria;Gammaproteobacteria;Enterobacteriales;Enterobacteriaceae;Xenorhabdus;bovienii;Xenorhabdus bovienii SS-2004	Chitinase		pfam00704
TCCM_0881.00000030	1343200	166390	1986400	2248200	1740500	3770000	457060	277910	1420500	1655100	5705100	6319900	502420	422980	1008200	2695600	2235000	5387200	1812100	1850600	1583300	2869300	5280700	5808400	4547600	3904000	2135800	4499800	5482400	105720	894680	3104200	3868500	3213400	435370	820150	106270	Bacteria;Cyanobacteria;unclassified;Oscillatoriales;unclassified;Trichodesmium;erythraeum;Trichodesmium erythraeum IMS101	Ribonuclease I		pfam00445
TCCM_0470.00000140	7413200	6036200	6468000	4840900	11530000	27603000	3478100	792040	2985300	3859700	1566400	2299900	3771300	5279800	4754700	7791100	3323800	11577000	3918600	968760	650650	5619800	8046100	10487000	2316100	4637500	3588400	1897500	1930700	374630	144600	5153700	2189000	1293100	1374000	6208400	2670200	Bacteria;Cyanobacteria;unclassified;Oscillatoriales;unclassified;Trichodesmium;erythraeum;Trichodesmium erythraeum IMS101
TCCM_0592.00000730	3331800	11892000	8332900	8291800	8306800	9544200	1962400	1150800	4605100	6787000	5360600	3344100	4728900	2557100	9366700	4748900	3329600	3769900	974460	1377300	1714800	2373200	4460000	6323300	5207500	2485100	2051200	3554900	5042200	566800	138930	6329400	3469600	5055400	1004400	1374500	2245800	Bacteria;Cyanobacteria;unclassified;Oscillatoriales;unclassified;Trichodesmium;erythraeum;Trichodesmium erythraeum IMS101
TCCM_0157.00000040	3812000	1745800	2004600	2931900	3106600	6316600	1033500	640850	1390700	1541400	3033600	1643700	2492600	3083400	2006000	1813600	1281800	2464000	705670	577730	398690	871090	3330900	2131100	1870500	1390100	1188800	2977700	2458100	340550	262110	1203900	1510000	769470	98500	806030	996430	Bacteria;Cyanobacteria;unclassified;Oscillatoriales;unclassified;Trichodesmium;erythraeum;Trichodesmium erythraeum IMS101	Predicted sensor protein/domain		pfam10069
TCCM_0716.00000110	3096100	4700800	0	3355800	9642000	4217200	1636800	46741	263420	142070	4038200	8222200	3293300	8784600	0	1545300	1323900	7202600	4061000	2454800	0	5506000	4778100	7377700	5448300	5572300	3081500	5179400	3653500	0	535880	4474100	3268500	3128200	0	386620	0	Bacteria;Cyanobacteria;unclassified;Oscillatoriales;unclassified;Trichodesmium;erythraeum;Trichodesmium erythraeum IMS101	cytochrome b6/f complex subunit IV	KO:K02637	pfam00032
TCCM_0254.00002640	1596500	4740600	6858100	9615600	5114100	11476000	1993900	2729600	8511800	9258900	624910	1082000	758190	774490	526370	9323900	6701200	17989000	9852700	414070	340690	4905600	7504900	7721600	1931000	3919700	2165800	1555800	1872600	0	5532600	13727000	6871900	818940	0	0	0
TCCM_0118.00000020	3771500	3212800	6814300	7309400	8888200	17382000	2391000	573670	2346400	2227700	3886500	4480200	4025000	4222600	1687600	2572600	1831900	4406300	3071100	869420	1147600	1920200	5877000	5102400	2875600	3944300	2414000	4243500	3370300	880420	900110	2550600	2140400	1844200	784750	6006900	2950700	Bacteria;Cyanobacteria;unclassified;Oscillatoriales;unclassified;Trichodesmium;erythraeum;Trichodesmium erythraeum IMS101	signal peptide peptidase SppA, 36K type	KO:K04773	pfam01343
TCCM_0981.00000010	3218600	3250600	4107400	4626400	5500800	8016000	1360400	655050	1685800	2540800	3910500	3994900	2197400	2029500	2132500	2230500	1857700	4703500	1313300	844210	1041700	2187600	2723500	3951700	2184200	1969800	1562500	2321800	2753800	575540	447920	1843900	2552200	2580000	438440	1273000	4455400	Bacteria;Cyanobacteria;unclassified;Oscillatoriales;unclassified;Trichodesmium;erythraeum;Trichodesmium erythraeum IMS101	dihydroxy-acid dehydratase	KO:K01687	pfam00920
TCCM_0931.00000230	3827700	6958400	2875900	5210100	7589800	16698000	2536200	1822800	4247600	7404700	11843000	16794000	6075500	6990000	1671200	6101000	3869100	6327500	2878300	2173200	2969800	3935800	7094500	8358600	6299800	4317900	2506800	9245900	7582600	768180	957760	4639400	7206600	7690500	260460	1162700	2174000	Bacteria;Cyanobacteria;unclassified;Oscillatoriales;unclassified;Trichodesmium;erythraeum;Trichodesmium erythraeum IMS101	ATP-dependent Clp protease, proteolytic subunit ClpP	KO:K01358	pfam00574
TCCM_0149.00000240	5100600	5832100	6846600	8994700	6934700	10465000	3049500	2122800	2344500	2411300	7929400	7354400	5189800	5278700	5152100	4321200	2203800	7000000	2001400	1497900	2024900	2252300	7453600	6874800	4632100	4591200	1773400	5996700	6271100	667240	646820	3246800	4002500	4824500	750320	1299000	3588800	Bacteria;Cyanobacteria;unclassified;Oscillatoriales;unclassified;Trichodesmium;erythraeum;Trichodesmium erythraeum IMS101			pfam14326
TCCM_0054.00000050	2177300	2055000	5831700	3218100	5501900	7945200	1324300	716780	1197200	1007100	2962200	3392600	1925700	1703400	2419400	1329000	813410	2614700	2482300	452400	542280	3836600	4866800	3308100	2113700	2948500	1363500	1793800	2492900	478590	606330	3171700	1145900	1441900	757760	1328500	514530	Bacteria;Cyanobacteria;unclassified;Oscillatoriales;unclassified;Trichodesmium;erythraeum;Trichodesmium erythraeum IMS101	phytoene desaturase	KO:K02293	pfam01593
TCCM_0510.00000100	1495300	0	2587600	2084600	8917100	13827000	2789800	280650	2147000	684490	6311100	5646000	4155600	3302500	1029100	1839100	1442800	5400400	1453900	1053500	1299600	1953600	3946800	5939500	4586000	1762000	1505600	4663900	4421700	258220	211260	2094800	2362500	2977400	1874900	3277000	131060	Bacteria;Cyanobacteria;unclassified;Oscillatoriales;unclassified;Trichodesmium;erythraeum;Trichodesmium erythraeum IMS101			pfam04536
TCCM_0339.00000200	540670	2703500	3658900	3433700	5950000	12475000	1628800	555140	1872600	720780	4087100	3091400	3204000	4751000	1929200	1720800	1662500	3413400	1707600	1127500	1102300	2548500	3974900	1542300	2791900	2465500	2470300	3020500	2209600	214650	694820	2538200	896950	1060100	1202600	1121400	959130	Bacteria;Cyanobacteria;unclassified;Oscillatoriales;unclassified;Trichodesmium;erythraeum;Trichodesmium erythraeum IMS101	ATPases of the AAA+ class		pfam00004
TCCM_0149.00000350	1617700	695300	392120	1337800	8930600	14284000	2039000	1414800	916810	1238200	5311600	4564600	2447100	1744700	1979300	2484400	1012200	1757900	2581300	1003600	760920	5013800	5447700	4561000	4422700	4631900	4289800	3083100	2577200	826000	376150	5151400	2312600	2983400	991500	3439900	550030	Bacteria;Cyanobacteria;unclassified;Oscillatoriales;unclassified;Trichodesmium;erythraeum;Trichodesmium erythraeum IMS101	PsbP.	KO:K02717	pfam01789
TCCM_0281.00000210	6542200	8920500	9432500	11021000	8729200	11831000	3382000	2878900	7604100	4477100	36067	3620900	5469400	4723700	8407400	5033800	3657600	5569500	3491000	1278500	1588700	4840000	9434800	3747700	3420200	7748900	3739900	2129700	3108600	1249000	370500	6257500	2153400	618070	2263600	7718800	4169500	Bacteria;Cyanobacteria;unclassified;Oscillatoriales;unclassified;Trichodesmium;erythraeum;Trichodesmium erythraeum IMS101	NAD dependent epimerase/dehydratase family.		pfam01370
TCCM_0385.00000020	1811200	3130300	7139800	7880200	3292000	8794100	976090	242200	2220300	515860	1918800	2677000	2196400	1585300	3138700	1628200	1233000	3980200	0	600300	1108700	1597100	2650100	2071800	1786100	2012200	2053400	2467800	2153300	637840	372490	1158100	1618400	1845700	1512300	2907300	2344000	Bacteria;Cyanobacteria;unclassified;Oscillatoriales;unclassified;Trichodesmium;erythraeum;Trichodesmium erythraeum IMS101	Dipeptidyl aminopeptidases/acylaminoacyl-peptidases		pfam00326
TCCM_0067.00000030	6457900	10729000	15072000	12616000	18260000	21339000	3655700	2206500	5022500	4789200	6843100	5222100	5494900	7680600	6151300	4891900	3780900	6748600	4566400	1526200	1500900	5174000	9467800	3040000	3761100	5942300	4243200	4316800	8179300	1930700	1419500	4342000	3418400	4169900	4258600	6691000	4325600	Bacteria;Cyanobacteria;unclassified;Oscillatoriales;unclassified;Trichodesmium;erythraeum;Trichodesmium erythraeum IMS101	ATPases with chaperone activity, ATP-binding subunit	KO:K03696	pfam07724
TCCM_0991.00000030	684300	4270400	6599700	6293200	6992700	10855000	1760800	1400900	2977400	1943900	9995000	10745000	3451600	1938900	2389700	4797300	3160300	10759000	3214700	920350	1751400	5510600	10750000	10282000	4622500	2605600	1948400	8368800	7138700	601340	910220	4218800	6763900	7302500	1245800	1698200	1448600	Bacteria;Cyanobacteria;unclassified;Oscillatoriales;unclassified;Trichodesmium;erythraeum;Trichodesmium erythraeum IMS101
TCCM_0594.00002200	0	0	0	0	0	0	0	0	0	0	28181000	16659000	0	0	0	26858000	13320000	34094000	22936000	10094000	17393000	21118000	20133000	25278000	29993000	24172000	1014200	16105000	30743000	0	930130	32275000	65107000	13338000	0	0	0
TCCM_0631.00000240	8411300	2560700	6946000	5407000	7466900	11930000	2274500	1902100	3876200	4429400	2981700	1836800	5119400	5483000	5028700	2980400	2069500	5376700	1826100	939030	1191400	2124200	3769200	3693600	2298500	3138800	1979000	3937800	5209500	483470	1329700	2395100	1329300	1304100	1501200	2932600	1132100	Bacteria;Cyanobacteria;unclassified;Oscillatoriales;unclassified;Trichodesmium;erythraeum;Trichodesmium erythraeum IMS101	adenylosuccinate lyase	KO:K01756	pfam00206
TCCM_0458.00005980	207780000	80543000	147530000	0	43928000	54316000	0	165570000	231290000	0	0	0	0	0	16154000	111660000	71940000	0	13543000	0	0	0	1838900	0	0	0	338570	0	0	0	0	2376000	8088600	0	0	10804000	0	Eukaryota;Chordata;Actinopterygii;Cypriniformes;Cyprinidae;Danio;rerio;Danio rerio Tuebingen	Actin and related proteins		pfam00022
TCCM_0373.00000260	14183000	17178000	17423000	7728600	23362000	22839000	6185200	4094100	8002600	7055500	17513000	15410000	9701400	11461000	9703900	7877200	8054200	13188000	11113000	3427700	3948500	14926000	19880000	9606400	6800500	13916000	10304000	10603000	10814000	1704100	4635800	13227000	4907200	6073700	2710800	5473700	1355400	Bacteria;Cyanobacteria;unclassified;Oscillatoriales;unclassified;Trichodesmium;erythraeum;Trichodesmium erythraeum IMS101	Phycobilisome protein.	KO:K02096	pfam00502
TCCM_0249.00000170	6703400	7094400	7314300	9242900	9572400	15296000	2963700	2595000	5852400	6143800	7267200	9024400	6141200	4920500	4847500	8386100	5785500	13616000	8060700	1983700	2618900	10877000	19872000	14472000	7004900	12428000	7539800	9669400	9427000	1557300	3538300	10455000	4175700	2728200	865890	2580900	924680	Bacteria;Cyanobacteria;unclassified;Oscillatoriales;unclassified;Trichodesmium;erythraeum;Trichodesmium erythraeum IMS101	Beta-propeller domains of methanol dehydrogenase type	KO:K06872	pfam04536
TCCM_0345.00000010	2638900	4821800	3844700	4020100	3939700	8227600	1113000	906740	2154000	1291500	3922600	3280000	1740000	1781600	2119000	1864500	1092900	2099900	1438900	799010	724940	2003400	4211000	3016600	1914300	2204100	1682700	2382400	2700900	257500	141040	1842600	1339900	1707500	1055100	2409500	2676300	Bacteria;Cyanobacteria;unclassified;Oscillatoriales;unclassified;Lyngbya;sp.;Lyngbya sp. CCY 8106	6-phosphofructokinase	KO:K00850	pfam00365
TCCM_0455.00000040	4166400	8266000	18725000	23831000	24551000	31143000	5085800	0	6364000	9725400	18394000	14580000	12109000	10817000	6559700	6844400	4874000	10740000	7930000	847710	2904300	9643000	21945000	15210000	10097000	9939600	10117000	11206000	11529000	1275000	577230	14993000	5543900	8656400	0	2240600	0	Bacteria;Cyanobacteria;unclassified;Oscillatoriales;unclassified;Lyngbya;sp.;Lyngbya sp. CCY 8106	CpcD/allophycocyanin linker domain.	KO:K02094	pfam01383
TCCM_0375.00000350	3459500	1133900	4474700	3831300	3228000	6152500	659500	655300	2044800	2647400	4369000	6155400	3327200	2435900	1360300	2515300	1906500	4576300	3309000	1310600	1405700	4887300	8290700	7906400	3168800	4980400	2770200	3735000	3794500	403130	534110	4483100	2249100	3473500	1461200	3529000	6428400	Bacteria;Cyanobacteria;unclassified;Oscillatoriales;unclassified;Trichodesmium;erythraeum;Trichodesmium erythraeum IMS101	Tellurite resistance protein TerB.		pfam05099
TCCM_0507.00000030	6348900	6414700	8119400	7672700	11062000	14629000	3532000	2644000	5643800	5119000	6557600	5900700	4809900	5396100	3299900	5680700	3931500	8211800	3124300	1516300	1637400	7087600	10323000	6771900	3523800	5078400	4742200	6978100	8573900	753940	1276900	5214200	3911400	2294600	397250	2897300	1921000	Bacteria;Cyanobacteria;unclassified;Oscillatoriales;unclassified;Trichodesmium;erythraeum;Trichodesmium erythraeum IMS101	diaminopimelate decarboxylase	KO:K01586	pfam02784
TCCM_0865.00003260	47208000	25411000	22930000	24359000	11709000	20860000	9510100	24648000	40273000	66825000	96687	66207	4393900	8568700	4004300	24538000	25780000	35515000	4477300	0	46207	1250300	2517500	1257000	657600	540470	0	0	0	0	0	2056800	888000	118020	0	533320	0	Eukaryota;Arthropoda;Insecta;Diptera;Culicidae;Aedes;aegypti;Aedes aegypti Liverpool	F0F1-type ATP synthase, alpha subunit	KO:K02132	pfam00306
TCCM_0869.00000100	12608000	4741800	4060800	9144200	34041000	47596000	7137100	2381500	13454000	5506100	15715000	20412000	14260000	19169000	11030000	10698000	6363400	12212000	13379000	7978500	10496000	7859700	7609400	25984000	10275000	15081000	1988800	23817000	33186000	2645800	0	11762000	25693000	11564000	2395400	7332100	12533000	Bacteria;Cyanobacteria;unclassified;Oscillatoriales;unclassified;Trichodesmium;erythraeum;Trichodesmium erythraeum IMS101	Hemolysin-type calcium-binding repeat (2 copies).		pfam00353
TCCM_0159.00000040	3833400	9377100	17278000	15706000	8690900	10119000	1252000	1375900	2525000	2901900	20609000	14036000	9398700	11880000	6282400	4984200	4668000	8763500	3422800	2462400	2969300	9375400	13464000	14050000	9806500	6861300	8832300	9609900	11751000	2438900	1863000	7099200	10994000	11904000	0	0	0	Bacteria;Cyanobacteria;unclassified;Oscillatoriales;unclassified;Trichodesmium;erythraeum;Trichodesmium erythraeum IMS101
TCCM_0518.00000020	10120000	12086000	13531000	13147000	8092800	16017000	2506700	2147600	2785700	2435000	2846800	3970500	4251700	6259400	5757200	3811600	2312500	5072300	4797600	578820	1464000	7059200	14112000	6889300	4253100	7547200	4354000	1343100	1753400	0	0	5779000	2772100	1447900	2023200	4338000	0	Bacteria;Cyanobacteria;unclassified;Oscillatoriales;unclassified;Trichodesmium;erythraeum;Trichodesmium erythraeum IMS101	ribosomal protein L16, bacterial/organelle	KO:K02878	pfam00252
TCCM_0316.00000150	2728200	3584000	6116600	5059500	4613000	5999000	2183800	1476100	2531800	2671300	3893100	3471200	3124500	3025200	3076600	4137500	1607000	4333500	3303300	937430	1013800	4173900	7851600	2918200	2906900	3392100	2701900	3254300	3714400	584490	399090	3579800	1841300	2114700	384970	2649700	2562700	Bacteria;Cyanobacteria;unclassified;Oscillatoriales;unclassified;Trichodesmium;erythraeum;Trichodesmium erythraeum IMS101	adenylosuccinate synthase	KO:K01939	pfam00709
TCCM_0942.00000010	3521700	5828600	14724000	22717000	6807000	9924300	2842100	2983900	3398200	4176000	7105200	8348500	3732900	4660700	3039300	7150200	3117200	8342800	6560300	898670	1261700	8178200	16864000	9628200	3648900	10539000	6614800	4907700	5032600	2515600	2219300	11136000	3786000	2733300	1877200	4296100	16787000	Bacteria;Cyanobacteria;unclassified;Oscillatoriales;unclassified;Trichodesmium;erythraeum;Trichodesmium erythraeum IMS101	Uncharacterized conserved protein		pfam10025
TCCM_0221.00000020	6840100	2475900	5698100	16388000	15978000	21484000	4049000	1685100	3166600	795350	7655200	11619000	4389800	4033500	1016600	5380400	4041100	9444000	4453500	2141800	2822100	4426100	7949300	13219000	6944600	4861100	3495700	5913800	5812400	1019700	204010	3799000	6369800	8673800	2519100	5690400	1445100	Bacteria;Cyanobacteria;unclassified;Oscillatoriales;unclassified;Trichodesmium;erythraeum;Trichodesmium erythraeum IMS101			pfam07176
TCCM_0070.00000020	8543300	7466300	11121000	8829200	12534000	14783000	2488200	1242200	5210700	3857400	6399700	4432900	4546900	5762900	4841400	4611600	2926300	7351400	1989800	862290	1089400	3237800	5114800	5508200	3176200	2804400	3629800	5302400	6392000	1028800	852200	2929500	3596500	3167200	0	0	4748600	Bacteria;Firmicutes;Bacilli;Bacillales;Bacillaceae;Geobacillus;thermodenitrificans;Geobacillus thermodenitrificans NG80-2	Phosphoserine aminotransferase	KO:K00831	pfam00266
TCCM_0313.00000010	1586800	3849000	6332500	6834500	9853200	13839000	2426600	671530	3157300	6302300	3606900	2864500	3347000	4793600	3929700	4292300	2469300	5121800	2343500	826020	768010	2213900	6034200	3147900	2641700	2475000	2419600	2796700	3507900	792380	858110	1847000	967440	1198900	895480	3738500	1749100	Bacteria;Cyanobacteria;unclassified;Oscillatoriales;unclassified;Trichodesmium;erythraeum;Trichodesmium erythraeum IMS101	DNA-directed RNA polymerase, gamma subunit	KO:K03046	pfam04997
TCCM_0409.00000040	7969000	5063300	6965200	5689200	11269000	16623000	3244800	2332400	4727200	4616100	12009000	10887000	4577300	5608700	4332000	4170200	3246800	7267300	3243500	1464000	1561600	6227400	8164800	8797300	6175700	5875400	3138800	7341300	7355600	745300	658660	5111000	4437600	4929700	967140	3348700	2447700	Bacteria;Cyanobacteria;unclassified;Oscillatoriales;unclassified;Trichodesmium;erythraeum;Trichodesmium erythraeum IMS101	Ribosomal protein S1	KO:K02945	pfam00575
TCCM_0093.00000020	1549600	2442700	1747800	2041400	4105300	6199800	1428600	584150	2260600	2813900	2476700	3971600	1468000	1612400	1063000	1542400	1634600	2591200	661990	792530	548830	2068800	3141100	1733200	1327500	1868300	1101700	1359200	2392700	580370	96605	1612000	1292000	1609100	458840	1717200	2144700	Bacteria;Cyanobacteria;unclassified;Oscillatoriales;unclassified;Trichodesmium;erythraeum;Trichodesmium erythraeum IMS101	Lysyl-tRNA synthetase (class II)	KO:K04567	pfam00152
TCCM_0778.00000040	7934000	1095500	1707800	3090900	3688200	15794000	2328700	411970	5504900	1360700	5499600	7898600	2535500	1649900	1966600	3152200	1294700	1468200	4815200	1071900	1141600	5604900	5406900	8343900	2314000	6715700	3335400	3949600	5901500	1035900	718870	6473500	2119100	854280	3228000	6751100	8636500	Bacteria;Cyanobacteria;unclassified;Oscillatoriales;unclassified;Trichodesmium;erythraeum;Trichodesmium erythraeum IMS101			pfam10722
TCCM_0121.00000020	138490	2661000	5769600	6351000	5912600	9216500	1998300	1528100	3459200	2710100	2481500	2927200	4351000	566020	1702700	3551600	2179200	3305900	1230100	465530	814860	2097200	7089800	2910900	1925100	4045000	2846600	2028900	2581400	314670	906670	2263200	1506300	1177600	566700	1015000	541850	Bacteria;Cyanobacteria;unclassified;Oscillatoriales;unclassified;Trichodesmium;erythraeum;Trichodesmium erythraeum IMS101	5,10-methylenetetrahydrofolate reductase	KO:K00297	pfam02219
TCCM_0251.00000030	5658600	4538200	5903700	7346600	6706100	10868000	1842200	406690	2268600	2249500	3505300	3773200	3103000	3370200	4620800	1129400	2651100	3345100	1149500	831290	949520	3128900	5082200	3943000	1376300	3335800	2291100	2384100	3262900	873850	961820	3475600	1712700	1542000	535910	1618000	2539500	Bacteria;Cyanobacteria;unclassified;Oscillatoriales;unclassified;Trichodesmium;erythraeum;Trichodesmium erythraeum IMS101	FeS assembly ATPase SufC	KO:K09013	pfam00005
TCCM_0006.00000080	5267400	4315400	9296500	9620300	7975200	11478000	3563400	1759300	3912000	4302400	4284800	3015700	4980100	4484200	4236100	4220700	3211000	4507900	2454900	1569700	911060	3941000	6338000	3936400	2555000	3311600	2648800	4312100	4449500	1214600	1069300	2832200	2507100	2643300	1828500	2505200	2703300	Bacteria;Cyanobacteria;unclassified;Oscillatoriales;unclassified;Trichodesmium;erythraeum;Trichodesmium erythraeum IMS101			pfam00106
TCCM_0819.00000030	1112700	1528000	2072900	2620400	4246100	6119500	936290	641590	1562600	1215300	3316300	2646300	1971600	2270800	1045200	3029200	1483600	3744900	1367600	1092300	1051500	2505700	4630200	3271300	3053600	2727900	1880400	3371000	2800000	734910	510100	1998300	1725500	1655000	563940	1131900	2233000	Bacteria;Cyanobacteria;unclassified;Oscillatoriales;unclassified;Trichodesmium;erythraeum;Trichodesmium erythraeum IMS101	NADPH:quinone reductase and related Zn-dependent oxidoreductases		pfam13602
TCCM_0018.00000340	9360000	18824000	16302000	8987700	16706000	30639000	5168800	2454400	4239400	6313900	9659800	17532000	11130000	8031900	8028500	4898500	4607600	10420000	9229000	2944500	2186300	16747000	23349000	8142700	9955600	13064000	12982000	11379000	14607000	3120100	4354400	11056000	7891500	6812800	1556000	3891300	5822000	Bacteria;Cyanobacteria;unclassified;Oscillatoriales;unclassified;Trichodesmium;erythraeum;Trichodesmium erythraeum IMS101	Universal stress protein UspA and related nucleotide-binding proteins		pfam00582
TCCM_0118.00005120	19022000	37132000	25012000	11338000	14073000	23792000	4444000	0	2448400	2058600	24261000	12589000	3114600	3164700	6448400	20302000	12959000	18424000	10539000	566480	682400	5309500	24679000	23815000	17466000	11403000	4510300	4189500	5927900	119630	160940	11220000	10474000	11469000	0	949180	8391500
TCCM_0241.00005510	47479000	0	0	0	12387000	24719000	9663000	27878000	43356000	37790000	4528600	0	3156000	11092000	4131800	19298000	12285000	31796000	0	0	0	0	3760200	0	1724600	0	0	0	0	0	0	2711600	2197000	2588700	0	0	0	Eukaryota;Arthropoda;Insecta;Diptera;Culicidae;Culex;pipiens quinquefasciatus;Culex pipiens quinquefasciatus JHB	Myosin tail.	KO:K10352	pfam01576
TCCM_0069.00000040	1270300	1194800	2146500	1268500	3425000	3347700	321600	111830	59518	253700	1916500	859840	970470	1713000	317620	540120	314990	1111300	101420	256090	279860	814280	1791800	1440100	613150	1076500	373160	1301700	1086500	369980	352490	853980	383190	542700	40019	397640	215720	Bacteria;Cyanobacteria;unclassified;Oscillatoriales;unclassified;Trichodesmium;erythraeum;Trichodesmium erythraeum IMS101	DNA topoisomerase I, bacterial	KO:K03168	pfam01131
TCCM_0483.00000010	3599200	802160	2002300	4556500	3715200	5171600	737770	183030	1505100	742760	5308200	5081800	1669600	1959100	1650700	2910900	2806700	5582900	3020700	1319900	1061200	4170300	6322600	2747100	3883500	4241300	3622400	3664000	2752500	407360	799800	5391200	3201500	3427800	406450	1012700	3468300	Bacteria;Cyanobacteria;unclassified;Oscillatoriales;unclassified;Trichodesmium;erythraeum;Trichodesmium erythraeum IMS101	ribonuclease PH	KO:K00989	pfam01138
TCCM_0308.00000010	1877800	846360	0	4369700	9486400	9921600	3691700	0	3220200	1968400	18163000	14625000	5707000	3054800	681020	4053600	2784300	4953300	2039900	2373000	4011500	2678800	14373000	20312000	5334300	6288500	282760	11107000	14528000	203520	1184300	770640	6782500	6567100	1213600	1695800	698140	Bacteria;Cyanobacteria;unclassified;Oscillatoriales;unclassified;Trichodesmium;erythraeum;Trichodesmium erythraeum IMS101			pfam14250
TCCM_0696.00000300	538830	0	0	0	3261400	10227000	541400	0	1028600	0	18654000	12775000	1311100	705430	509020	3245000	3771400	13932000	3306600	14115000	7864100	1911300	9711600	21937000	14144000	6332800	2824400	8046600	24526000	0	761430	4758000	13924000	23336000	2837600	442850	0
TCCM_0714.00000240	2104400	1809600	2335400	2464900	4472700	7734000	1686000	695600	1758700	2546600	4271700	3728600	4211800	3799100	2351200	1737600	827810	3069000	1480800	1031800	1020200	1929100	1993100	2728000	2339700	1736400	1424800	3055700	4242200	493010	610560	1703200	1464500	2335300	132260	395310	1462300	Bacteria;Cyanobacteria;unclassified;Oscillatoriales;unclassified;Trichodesmium;erythraeum;Trichodesmium erythraeum IMS101	ATP:corrinoid adenosyltransferase	KO:K00798	pfam02572
TCCM_0571.00000020	4662600	5628300	7665800	11376000	6945300	10811000	2347700	1642000	3346400	2887100	4453600	4887800	4181500	5958700	4076300	4264200	2398300	4445800	2803600	889660	1083400	2176500	4162100	4451600	2829500	2127700	1397400	2821900	3297400	1724000	1523400	2923200	3867100	2790000	1303800	3325200	4445100	Bacteria;Proteobacteria;Gammaproteobacteria;Alteromonadales;unclassified;Teredinibacter;turnerae;Teredinibacter turnerae T7901	Uncharacterized protein conserved in bacteria		pfam13449
TCCM_0089.00000030	3939700	8652900	11245000	11100000	1772200	3685700	824430	668160	2149900	1090900	4355300	5250400	5271400	2963400	4863600	1786200	1638300	2062200	2621400	477620	637670	6066500	7839100	3902900	3495100	4601700	3666700	4465000	3696200	966490	603420	4013700	2386900	2714800	475520	864120	907240	Bacteria;Cyanobacteria;unclassified;Oscillatoriales;unclassified;Trichodesmium;erythraeum;Trichodesmium erythraeum IMS101	Uridine kinase	KO:K00855	pfam00485
TCCM_0501.00000010	4324000	3233200	6097900	4776200	6086000	11816000	1554900	1151000	1339200	1890300	2857100	2589000	2930000	2800400	5713100	2833600	3357200	5293500	2241000	1496800	1462800	4064900	5800700	4790700	1909500	3072600	2740100	3907200	4264900	310090	384230	3023100	3058200	1460800	658260	1465900	955100	Bacteria;Cyanobacteria;unclassified;Oscillatoriales;unclassified;Trichodesmium;erythraeum;Trichodesmium erythraeum IMS101	Transaldolase	KO:K00616	pfam00923
TCCM_0386.00000440	51142000	19076000	39833000	33400000	58321000	83347000	14626000	12953000	29169000	27588000	51679000	52914000	22956000	28492000	23531000	25386000	20940000	42627000	13831000	11298000	9656300	28210000	41924000	41846000	22100000	27358000	18007000	23658000	33375000	7067100	11703000	24015000	16450000	24038000	7321900	13533000	19481000	Bacteria;Cyanobacteria;unclassified;Oscillatoriales;unclassified;Trichodesmium;erythraeum;Trichodesmium erythraeum IMS101	Molecular chaperone	KO:K04043	pfam00012
TCCM_0088.00000460	6329400	9734800	12673000	12580000	6622000	13054000	1882800	254430	1193200	0	3864900	2771700	3961400	5066500	4518400	3277600	2192500	5759000	3922500	877800	1247500	6847000	11347000	4228200	2193100	6033800	5208800	1445100	1459400	594760	678260	6696800	2160800	2156200	958450	2226900	2227800	Bacteria;Cyanobacteria;unclassified;Oscillatoriales;unclassified;Trichodesmium;erythraeum;Trichodesmium erythraeum IMS101	MoaD family protein, archaeal		pfam02597
TCCM_0503.00000590	0	0	467370	1040600	1825900	2330600	413720	6325300	10060000	14928000	9564300	19360000	779330	863320	0	11912000	8429100	25358000	14348000	4172200	9850400	17729000	37982000	24307000	19941000	25211000	9340900	8648300	12571000	0	7652500	18255000	18823000	3641500	0	0	0
TCCM_0853.00003340	0	0	0	0	0	0	0	0	0	0	273420	212050	0	0	0	0	0	0	0	1057100	0	19675000	0	0	221680	0	10804000	0	0	0	0	11888000	948020	0	0	0	0	Bacteria;Cyanobacteria;unclassified;Oscillatoriales;unclassified;Trichodesmium;erythraeum;Trichodesmium erythraeum IMS101
TCCM_0015.00000060	1572700	2113500	4222800	3644200	1820300	2704900	638270	273140	331710	407600	886180	871150	1696200	1557800	1494700	987760	175770	1052300	1837500	281800	307200	2388800	4980000	1248900	926390	2254600	1837700	986600	1051200	255480	241390	2689500	605170	409890	85119	1079500	635160	Bacteria;Cyanobacteria;unclassified;Oscillatoriales;unclassified;Trichodesmium;erythraeum;Trichodesmium erythraeum IMS101	valyl-tRNA synthetase	KO:K01873	pfam00133
TCCM_0374.00000120	3712200	3045100	2145000	2595700	6737900	8378300	2271400	0	0	1650100	3167700	2742600	3110400	4421900	2758700	0	1561400	3058600	1437000	767990	561390	2892800	4561800	3302200	2494700	3260000	2125100	2257000	4128300	750170	1014300	3081300	1903600	1466500	801680	2464700	2472000	Bacteria;Cyanobacteria;unclassified;Oscillatoriales;unclassified;Trichodesmium;erythraeum;Trichodesmium erythraeum IMS101	Dinucleotide-utilizing enzymes involved in molybdopterin and thiamine biosynthesis family 2		pfam00899
TCCM_0405.00000120	5216200	4506800	10302000	7798600	13561000	19252000	3949200	1958500	4638900	4172400	3281100	3195900	2450400	2652900	3786200	4801700	3859300	7581900	3183800	692630	843210	5023300	7739600	5677500	2366400	4476200	3169400	1819900	2167100	481930	579300	4660500	3103100	1919900	1601300	6194700	0	Bacteria;Cyanobacteria;unclassified;Oscillatoriales;unclassified;Trichodesmium;erythraeum;Trichodesmium erythraeum IMS101	ABC-type amino acid transport/signal transduction systems, periplasmic component/domain	KO:K02030	pfam00497
TCCM_0494.00000220	4811500	7473400	12561000	11902000	6134200	11186000	2222000	1881700	3556900	4344500	5254000	5851400	4634900	5438900	6873600	3964500	3318600	5862100	3815000	1016400	1768800	6250100	7685300	6255700	4324600	6363000	3804000	6870400	7000100	839450	1359100	5692400	3909800	2523200	1687600	4157300	2981700	Bacteria;Cyanobacteria;unclassified;Oscillatoriales;unclassified;Trichodesmium;erythraeum;Trichodesmium erythraeum IMS101	Dienelactone hydrolase and related enzymes	KO:K01061	pfam01738
TCCM_0663.00000110	6336400	3235300	4861600	6234100	6103400	8950300	2619500	2297100	2098300	1680100	6260300	5117100	3708000	3772100	4876000	4151300	3628200	7907400	3170100	2210700	2165400	3363700	7449600	4271600	3614700	3937800	2741900	4644500	7184700	150220	0	3679200	6688600	4145200	1321300	2684700	2692700	Bacteria;Cyanobacteria;unclassified;Oscillatoriales;unclassified;Trichodesmium;erythraeum;Trichodesmium erythraeum IMS101	LL-diaminopimelate aminotransferase	KO:K10206	pfam00155
TCCM_0615.00000040	6539600	0	0	0	11780000	23755000	4687700	691780	684150	1403300	16772000	17550000	11689000	15037000	3586700	6433000	3524100	3478200	1457600	3100800	3624100	2127200	10333000	6700000	11095000	2997700	1801500	10575000	10930000	924220	654170	1862700	3814000	4252500	2526600	5812000	3623900	Bacteria;Cyanobacteria;unclassified;Oscillatoriales;unclassified;Trichodesmium;erythraeum;Trichodesmium erythraeum IMS101	ribosomal protein S2, bacterial type	KO:K02967	pfam00318
TCCM_0021.00000170	5757000	3899800	5078000	3877900	6169300	12847000	1683800	1098000	2843500	2694900	4298100	4421100	3877900	4431900	3030600	2758600	1902400	4598000	1776200	760900	801190	2444300	4569200	3617000	2655900	2971500	1999200	3496200	3743500	854810	854170	2163200	1181500	1633300	1187100	2524500	2309500	Bacteria;Cyanobacteria;unclassified;Oscillatoriales;unclassified;Trichodesmium;erythraeum;Trichodesmium erythraeum IMS101	DNA-directed RNA polymerase, beta'''' subunit	KO:K03046	pfam04998
TCCM_0716.00000020	874120	1826500	2257300	2144500	4379900	4495800	888690	0	1339400	1154900	1712200	1705400	1498700	1705300	1613200	1055300	869940	1640100	299850	449790	364070	1160000	1964900	1529100	1633200	745950	648560	1805000	1221900	232550	207170	1463600	1521000	1808100	719940	1468100	997270	Bacteria;Cyanobacteria;unclassified;Oscillatoriales;unclassified;Trichodesmium;erythraeum;Trichodesmium erythraeum IMS101	alanine--tRNA ligase	KO:K01872	pfam01411
TCCM_0759.00000020	17489000	1888200	6471300	7974600	26193000	39450000	10599000	6124500	13400000	10452000	24193000	31456000	12873000	17231000	13603000	19459000	11473000	31632000	9815100	5475600	8731900	14511000	22807000	29025000	22941000	13387000	10120000	17767000	22314000	2243700	2261600	12715000	23490000	18542000	1455400	1987500	8969000	Bacteria;Cyanobacteria;unclassified;Oscillatoriales;unclassified;Trichodesmium;erythraeum;Trichodesmium erythraeum IMS101	Bacterial nucleoid DNA-binding protein	KO:K03530	pfam00216
TCCM_0787.00000020	1358100	6624900	8369700	6460100	9537600	18617000	2813600	343010	939010	833270	4839400	2417600	3227600	3581500	3004200	3321500	1242800	4635700	1587000	1175100	439690	1956600	4446800	4430100	2372600	2602200	1801700	2279300	1933200	788210	474140	2019400	2483000	2347900	1214900	2735100	2099600	Bacteria;Cyanobacteria;unclassified;Oscillatoriales;unclassified;Trichodesmium;erythraeum;Trichodesmium erythraeum IMS101	ABC-type nitrate/sulfonate/bicarbonate transport systems, periplasmic components	KO:K02051	pfam09084
TCCM_0005.00000560	2031700	6137400	7751400	6779900	6144000	10154000	2039800	2126200	5421300	3961100	5624000	5123100	3770100	2588800	2621900	6827200	3358300	7511500	4517300	1344500	1009500	6187600	12449000	5709900	3638200	5777100	5847500	5694000	7219700	885540	539650	5932400	1830600	2502400	832380	2663700	833470	Bacteria;Cyanobacteria;unclassified;Nostocales;Nostocaceae;Nostoc;punctiforme;Nostoc punctiforme PCC 73102	Dehydrogenases with different specificities (related to short-chain alcohol dehydrogenases)		pfam08659
TCCM_0221.00000700	7608000	3922100	1258600	6012500	11120000	17091000	1702300	1490200	2946800	3452300	10548000	4291500	4312100	2114900	2401000	5111400	3010000	8141700	3905900	1989500	1504500	4775300	11545000	8593000	4550000	5798900	3681600	3667500	5480600	274800	341480	7129600	3304900	1784700	2868000	3335600	3730900	Bacteria;Cyanobacteria;unclassified;Oscillatoriales;unclassified;Trichodesmium;erythraeum;Trichodesmium erythraeum IMS101
TCCM_0800.00002130	763470	0	3792100	0	1405300	2243700	1136300	0	0	0	69978000	61677000	0	0	1361300	13051000	11382000	26494000	10107000	239430	1648500	11663000	12794000	20219000	20222000	14638000	1007600	1650000	2334600	0	0	34411000	54475000	19738000	349410	885010	0	Bacteria;Cyanobacteria;unclassified;Oscillatoriales;unclassified;Trichodesmium;erythraeum;Trichodesmium erythraeum IMS101
TCCM_0199.00000580	2344900	0	9205500	1466100	9230900	16840000	2853200	1311700	3374900	4914500	13555000	10471000	13338000	16679000	1990700	6147200	4241200	9505400	1856900	2126900	2467400	3205700	2589500	11784000	5109200	2917800	2567100	7470700	10540000	1904200	1293600	2847500	4879800	5519200	0	424430	4007000	Bacteria;Cyanobacteria;unclassified;Oscillatoriales;unclassified;Trichodesmium;erythraeum;Trichodesmium erythraeum IMS101
TCCM_0985.00000020	6421900	12469000	11430000	12509000	14364000	22823000	3655200	2514000	1805900	3051700	4872400	6160100	10268000	8552000	8082900	3516300	2581400	7295300	460520	1000900	729830	1176600	5013500	4896600	2981400	1540300	1675800	4256800	3661500	135880	0	1148600	3595600	3038700	581220	2039100	3850700	Bacteria;Cyanobacteria;unclassified;Oscillatoriales;unclassified;Trichodesmium;erythraeum;Trichodesmium erythraeum IMS101	Dihydroorotase and related cyclic amidohydrolases	KO:K01465	pfam13147
TCCM_0193.00000180	5444000	755680	0	1407600	6872300	9277100	413210	1898800	5055700	4229100	12444000	28062000	606430	782190	0	4370900	2796900	13005000	1318700	1844100	1596500	863100	6114200	34161000	13891000	1961700	3989300	12552000	9785500	0	7400500	2573500	3513800	6095500	369890	0	0	Plasmid:Bacteria;Actinobacteria;Actinobacteria;Actinomycetales;Streptomycetaceae;Streptomyces;rochei;Streptomyces rochei 7434AN4 plasmid pSLA2-L
TCCM_0194.00000010	1994900	1586100	4883400	4907300	6063300	8461200	1667300	644200	1508500	1530100	4120200	3953500	1267500	1827100	2579100	1857900	1095000	2699300	2084000	821210	953620	1843200	2357700	2583200	2048500	1974500	1418300	2710800	3536900	241740	381920	2206400	2166400	2188700	0	2498900	335090	Bacteria;Cyanobacteria;unclassified;Chroococcales;unclassified;Cyanothece;sp.;Cyanothece sp. CCY 0110	3-phytase (myo-inositol-hexaphosphate 3-phosphohydrolase)		pfam02333
TCCM_0409.00000380	0	0	0	0	0	1107100	0	89766	255750	337210	15494000	14074000	0	0	0	5730100	2613200	11867000	6057900	1239600	1399700	8203900	7594200	8372200	6143200	3381500	3532500	5242900	4697100	270490	4441400	9850700	9764000	11041000	0	0	0	Bacteria;Cyanobacteria;unclassified;Chroococcales;unclassified;Cyanothece;sp.;Cyanothece sp. PCC 8801			pfam12902
TCCM_0244.00000010	9241200	10489000	13998000	12997000	14330000	14383000	3555200	2604200	8457100	5402100	5967400	10397000	5469400	6460000	9394200	5905100	3541600	7818200	3944900	1665900	1769100	6470900	13051000	6940900	4542300	8579300	5316600	3388100	7874300	0	567700	6445100	3876700	5170300	1927900	8580400	4015100	Bacteria;Cyanobacteria;unclassified;Oscillatoriales;unclassified;Trichodesmium;erythraeum;Trichodesmium erythraeum IMS101	Nucleoside-diphosphate-sugar epimerases
TCCM_0049.00000280	1551600	2634000	5265200	5186000	4646700	5886800	850120	102620	2236300	860890	2254700	2782000	1717100	2528700	1935000	1836400	1556100	1352400	1718700	782820	637690	2930500	4252500	3608200	2683700	3323600	1438800	3204200	3250900	165640	0	2608800	1548000	1237300	0	931140	952240	Bacteria;Cyanobacteria;unclassified;Oscillatoriales;unclassified;Trichodesmium;erythraeum;Trichodesmium erythraeum IMS101	Type II secretory pathway, pullulanase PulA and related glycosidases	KO:K02438	pfam00128
TCCM_0187.00000020	40408	572460	745870	1220500	1997700	3009400	581430	52238	808830	129930	1820100	1347400	974080	1593500	93455	1011200	1026200	1649500	507450	351520	236390	849410	1291300	1900000	1345600	1197400	605380	1107900	1816900	0	95637	825760	905130	589580	5315.4	65277	1359500	Bacteria;Cyanobacteria;unclassified;Oscillatoriales;unclassified;Trichodesmium;erythraeum;Trichodesmium erythraeum IMS101	polyphosphate kinase 1	KO:K00937	pfam13090
TCCM_0533.00000020	957690	6039700	5068000	4222100	7598500	11974000	2299300	1854400	3887400	2576400	4256600	3745300	3348500	2969800	3282500	2766000	1178800	5113700	2771500	902480	515520	3305800	6291300	3748500	1879200	3587000	2505500	2976800	4083900	455170	945530	4062400	1551500	1255100	831490	906090	580980	Bacteria;Cyanobacteria;unclassified;Oscillatoriales;unclassified;Trichodesmium;erythraeum;Trichodesmium erythraeum IMS101
TCCM_0546.00000030	1246700	1386000	3713600	3351100	4783700	6058800	1221700	629780	1152800	998190	3778800	3545300	3106500	1905400	1608000	1967900	1584400	2743600	675410	536450	734770	1732000	2659000	3194400	1803800	1310200	1153400	2287400	2546100	130700	502320	1045300	1203000	1482600	777970	1680700	1652400	Bacteria;Cyanobacteria;unclassified;Oscillatoriales;unclassified;Trichodesmium;erythraeum;Trichodesmium erythraeum IMS101	Type IIA topoisomerase (DNA gyrase/topo II, topoisomerase IV), A subunit	KO:K02469	pfam00521
TCCM_0298.00000490	0	0	0	0	0	0	0	0	0	0	0	40959	0	0	0	0	0	0	0	0	0	0	0	0	0	0	0	0	0	0	0	0	0	0	0	0	0	Bacteria;Cyanobacteria;unclassified;Oscillatoriales;unclassified;Trichodesmium;erythraeum;Trichodesmium erythraeum IMS101
TCCM_0687.00000030	0	0	1001600	4551800	8934500	13927000	2308500	0	893150	0	1952600	5381400	2309100	3278300	93902	2547500	2291100	2762900	892510	1302000	1072600	811770	4194000	4904900	3135600	1519200	559160	2715000	3435200	0	0	1150800	2104000	1146200	1481300	4382900	2009900	Bacteria;Cyanobacteria;unclassified;Oscillatoriales;unclassified;Microcoleus;chthonoplastes;Microcoleus chthonoplastes PCC 7420	von Willebrand factor type A domain.		pfam13519
TCCM_0691.00000010	0	879930	1591400	1684000	4594300	4337200	1203000	701090	369820	318770	2520400	5341100	1697500	1717400	698070	1473200	1244700	1303700	1016300	566830	1112200	1783600	4354100	1881900	757010	1617700	1164800	1676200	1158100	198460	355890	879740	2126000	1695500	778760	1718200	1072100	Bacteria;Cyanobacteria;unclassified;Oscillatoriales;unclassified;Trichodesmium;erythraeum;Trichodesmium erythraeum IMS101	Oxyanion-translocating ATPase	KO:K01551	pfam02374
TCCM_0087.00000050	2819900	698390	1854900	2720000	5983500	6833500	1571500	663420	3153200	3155000	4851500	5434300	3478200	2117500	2472000	2731400	2532700	4931200	2367300	937030	1219900	4630000	3856700	4741800	2847500	3299000	3417200	3753300	5886300	556070	108630	2610000	2664900	2789200	85710	1816600	2221700	Bacteria;Cyanobacteria;unclassified;Oscillatoriales;unclassified;Trichodesmium;erythraeum;Trichodesmium erythraeum IMS101	Methyltransferase domain.		pfam13649
TCCM_0225.00000050	2850900	6559600	3318100	4658300	8976900	14122000	1657200	757770	4643600	2313400	10326000	6026200	3530800	5232100	3252800	4960500	1198600	3557000	1400200	662530	873820	4150600	6726000	9615400	4797000	4289300	2516800	3645100	7274800	122760	379800	3020600	4563200	4774000	0	90477	1139100	Bacteria;Cyanobacteria;unclassified;Oscillatoriales;unclassified;Trichodesmium;erythraeum;Trichodesmium erythraeum IMS101	Cysteine synthase	KO:K01738	pfam00291
2503612344	5805000	15710000	18924000	11289000	14191000	22259000	0	2218700	0	6235100	747190	462600	7045900	6685800	6915200	4285600	3358300	4765300	2633600	1044400	915080	12230000	10997000	0	496230	8504800	6483000	0	2034600	2903900	3594400	8598300	1210100	816770	0	0	0
TCCM_0575.00000040	1142800	2733400	3314700	4026400	3801300	5920800	1338500	615610	1810900	1989900	2607200	2802800	1492800	733310	3060900	2011300	1244000	4651200	1830800	649570	544620	3379200	4900300	3839400	2037500	3114400	2136400	2982900	2078200	437600	724770	2834300	2613600	2279600	1099700	2380600	1887000	Bacteria;Cyanobacteria;unclassified;Oscillatoriales;unclassified;Trichodesmium;erythraeum;Trichodesmium erythraeum IMS101	Predicted Zn-dependent peptidases	KO:K01412	pfam05193
TCCM_0690.00000020	1442900	916300	5410300	5589900	2890900	5416000	1325700	275130	814250	753090	2933000	4842600	1691300	2711100	286300	1820000	495720	2579400	1067700	948530	1100000	1718400	4603800	5645400	2203500	1656800	1423400	3203000	2767500	303540	376190	1640200	3278100	1312400	207510	697660	1775700	Bacteria;Cyanobacteria;unclassified;Oscillatoriales;unclassified;Trichodesmium;erythraeum;Trichodesmium erythraeum IMS101	glutathione synthetase, prokaryotic	KO:K01920	pfam02955
TCCM_0219.00000170	0	0	0	0	6455100	8660500	1364500	597460	2037600	1342100	5441500	5800400	804480	1571100	0	1981300	1605700	3229400	1356600	950680	1466700	2450800	3013500	2589200	2316200	2852700	1505000	3061000	3597500	285040	1037400	1817100	1508600	1554500	0	0	1274000	Bacteria;Cyanobacteria;unclassified;Oscillatoriales;unclassified;Trichodesmium;erythraeum;Trichodesmium erythraeum IMS101	geranylgeranyl reductase	KO:K10960	pfam01494
TCCM_0900.00002510	0	0	0	0	0	0	0	0	0	0	0	0	0	0	0	0	0	5878400	0	0	0	0	0	0	0	0	0	0	0	0	0	0	0	0	0	0	0	Bacteria;Proteobacteria;Gammaproteobacteria;Alteromonadales;Alteromonadaceae;Alteromonas;macleodii;Alteromonas macleodii Deep ecotype, DSM 17117	F0F1-type ATP synthase, alpha subunit	KO:K02111	pfam00306
TCCM_0825.00000090	7716200	5366700	7818900	8638900	6417800	8155700	1881600	522110	2621400	1360600	881570	1414900	4029400	5931000	5283000	1058000	778230	3175500	599070	554850	399200	1317100	2899800	929710	135020	1516900	1110300	683750	1143900	389750	50749	1010300	538330	815110	660080	1875500	893930	Bacteria;Cyanobacteria;unclassified;Oscillatoriales;unclassified;Trichodesmium;erythraeum;Trichodesmium erythraeum IMS101	acetylornithine and succinylornithine aminotransferases	KO:K00818	pfam00202
TCCM_0056.00000050	2904900	0	1238400	376860	5330200	6946100	1775200	1221000	2309500	2612300	6633800	6112700	1768700	2124300	1548400	2846000	1579500	4014100	2176800	1375700	779790	3601800	6758800	5391700	4585900	3728600	2342900	4722000	5178800	1281100	1478700	3315500	1971100	2648300	1029500	1299100	0	Bacteria;Cyanobacteria;unclassified;Oscillatoriales;unclassified;Trichodesmium;erythraeum;Trichodesmium erythraeum IMS101	Membrane protease subunits, stomatin/prohibitin homologs		pfam01145
TCCM_0247.00000020	3679600	5773400	8080000	8525100	9664600	14802000	3534300	1770200	2539200	2013500	5870600	6656400	4469700	5144600	4963600	4967300	3685400	8467800	2983700	1587200	2063200	5139300	6369400	8544000	5940400	3881300	2454900	5100000	5933700	828970	1476600	4187600	2924500	3324300	933930	1885800	2106000	Bacteria;Cyanobacteria;unclassified;Oscillatoriales;unclassified;Trichodesmium;erythraeum;Trichodesmium erythraeum IMS101	pyrroline-5-carboxylate reductase	KO:K00286	pfam14748
TCCM_0018.00000090	513200	1822000	2131200	1602000	4869000	5710300	801480	212380	3181400	2563400	3640300	3814000	1086100	2214900	82046	2772300	2370100	4770600	2128200	735610	1450100	3033200	5497800	4375300	3068400	2604200	2164000	3069100	3142600	762410	137280	2957400	1487500	1661900	418550	837040	1340100	Bacteria;Cyanobacteria;unclassified;Oscillatoriales;unclassified;Trichodesmium;erythraeum;Trichodesmium erythraeum IMS101	phosphate ABC transporter, ATP-binding protein	KO:K02036	pfam00005
TCCM_0430.00000020	2159200	2822100	956340	3930300	5329000	6503100	1523800	785400	2339300	2093400	3226800	2871100	2878300	4659400	3629800	2587900	1166300	3247700	1794100	637700	761750	3739800	6490000	3591500	1839400	3842900	3918000	2114400	3526000	235010	664580	2812900	1819300	1479100	631970	1410000	0	Bacteria;Cyanobacteria;unclassified;Oscillatoriales;unclassified;Trichodesmium;erythraeum;Trichodesmium erythraeum IMS101	Aspartate-semialdehyde dehydrogenase	KO:K00133	pfam02774
TCCM_0869.00000690	0	0	0	0	0	0	0	0	0	0	0	10714000	0	0	0	7439900	6669800	0	0	8921300	16733000	0	2288600	7209900	7131200	4149000	3148300	13125000	4802500	0	0	4704400	7033700	7857800	0	0	0
TCCM_0548.00000100	2735300	3270700	4593700	4431200	1348100	6091400	1687200	0	2174000	0	483010	1096900	2544800	2290100	2833100	3242100	0	425440	3830600	54821	158010	5513700	8151900	771160	362810	5931700	4562700	303950	924990	667440	1209600	5220000	755190	390000	661180	1745700	3434000	Bacteria;Cyanobacteria;unclassified;Oscillatoriales;unclassified;Trichodesmium;erythraeum;Trichodesmium erythraeum IMS101	looped-hinge helix DNA binding domain, AbrB family		pfam14250
TCCM_0591.00000010	1230500	327070	2340000	2371000	3374300	4675000	966780	201800	1401900	818550	2876600	1387700	1366300	1420900	1164100	1479500	1068400	2593500	1277600	630940	400860	3053100	3148500	2304800	1510400	1994100	1525800	2200700	1932400	415150	484260	1972000	1123000	1090000	537680	2144900	971150	Bacteria;Cyanobacteria;unclassified;Oscillatoriales;unclassified;Trichodesmium;erythraeum;Trichodesmium erythraeum IMS101	ATP phosphoribosyltransferase, regulatory subunit	KO:K01892	pfam13393
TCCM_0709.00000010	14008000	12768000	23226000	19796000	7773700	7123200	1306300	1143100	1749900	2259200	886740	452820	8777700	9948000	8104300	3836300	2888400	3910800	13436000	618670	325580	20534000	29175000	18753	512890	18960000	13554000	157740	1565100	2365000	1740900	17547000	1131300	710970	245040	4803400	3401200	Bacteria;Cyanobacteria;unclassified;Oscillatoriales;unclassified;Trichodesmium;erythraeum;Trichodesmium erythraeum IMS101	Ribosomal protein L10	KO:K02864	pfam00466
TCCM_0426.00000030	4576700	1659800	2500300	3450800	5296800	10801000	1541600	30491	1884900	1130300	4042800	3436300	3413500	1877800	1501300	3193000	1821800	2819600	1058600	1008200	1519200	1850700	2043000	4481700	1596200	1279500	801280	3256500	5378600	829410	573520	2022500	2429400	1509400	198790	935540	262250	Bacteria;Cyanobacteria;unclassified;Oscillatoriales;unclassified;Trichodesmium;erythraeum;Trichodesmium erythraeum IMS101	tryptophan synthase, beta subunit	KO:K01696	pfam00291
TCCM_0699.00000100	3880700	831660	2326700	6200600	8416000	12159000	2773700	2072400	4643400	3232300	6879900	7261500	6196100	3241500	2175000	4491300	2633800	8119700	5919800	2516300	3125100	9892600	10325000	15362000	5157600	8616900	5538100	12120000	18119000	1952000	2178700	9935200	8039700	1590300	309150	3110500	2241900	Bacteria;Cyanobacteria;unclassified;Oscillatoriales;unclassified;Trichodesmium;erythraeum;Trichodesmium erythraeum IMS101			pfam13385
TCCM_0656.00000100	2845100	3493500	6042600	3691900	4521000	6435500	1385800	795620	1540700	1573800	3029200	2611700	1470400	1923400	3271400	1293300	475180	2119700	1284400	701490	481190	2212200	3867300	1501200	1725900	2054500	1539000	1873300	2926300	765550	257530	2288900	1386300	2015800	408610	2604300	1095000	Bacteria;Cyanobacteria;unclassified;Oscillatoriales;unclassified;Trichodesmium;erythraeum;Trichodesmium erythraeum IMS101
TCCM_0802.00000170	4139300	9541100	14066000	9482100	16827000	19933000	4763900	1825000	6872300	3421700	3968900	3655800	11297000	11703000	2697300	3081400	1361000	1841700	2697900	678050	680170	3899800	8535600	2273800	2303400	6408500	2823100	2835000	3941100	2265000	652310	1362100	408060	2439200	1293500	1966000	6579000	Bacteria;Cyanobacteria;unclassified;Nostocales;Nostocaceae;Nostoc;punctiforme;Nostoc punctiforme PCC 73102	Polyketide synthase modules and related proteins		pfam00109
TCCM_0017.00000080	0	3483900	11846000	15378000	14227000	23504000	1330100	0	0	0	11591000	13789000	7448400	6116800	1255700	1033600	0	4489900	2065100	3569300	2972600	6248100	10995000	11633000	9233800	5762500	1710500	9162000	7207300	0	0	6585600	8259700	7261400	2370500	8901400	0	Bacteria;Cyanobacteria;unclassified;Oscillatoriales;unclassified;Trichodesmium;erythraeum;Trichodesmium erythraeum IMS101	Ribosomal protein L13	KO:K02871	pfam00572
TCCM_0774.00000330	6219100	3818100	7268800	9273600	12940000	17534000	1751800	2027900	2292400	5489900	2242100	3788800	1261100	1470200	2280600	6340700	6914200	11845000	7304200	1326400	2363500	10743000	26296000	21361000	3846000	9369600	3950800	7142100	12325000	0	31765	9645400	8866500	1108000	242440	2066100	0	Bacteria;Cyanobacteria;unclassified;Chroococcales;unclassified;Cyanothece;sp.;Cyanothece sp. PCC 7822
TCCM_0980.00000200	583800	0	799030	1716300	2695000	3932800	1197300	0	0	1127100	5699200	8364000	789080	719320	1065800	6212300	2938300	6446600	3923200	2410300	2111700	9360600	10090000	10235000	7456500	5232100	6973700	8633200	12430000	113050	210700	5720400	3105000	3777300	0	621690	0	Bacteria;Cyanobacteria;unclassified;Chroococcales;unclassified;Microcystis;aeruginosa;Microcystis aeruginosa NIES-843	Acyl-CoA synthetases (AMP-forming)/AMP-acid ligases II		pfam00501
TCCM_0437.00000010	1690900	4382100	6382700	5748800	8748300	11623000	3269300	1700100	3775700	1092300	4941200	5480500	3270900	4495200	2213900	1915400	1817900	3574200	1955200	730280	648830	2308200	5118000	3408900	2562000	2713900	2003600	2051700	4326700	1449100	0	1955400	1982000	1714900	1256800	2325100	4086800	Bacteria;Cyanobacteria;unclassified;Oscillatoriales;unclassified;Trichodesmium;erythraeum;Trichodesmium erythraeum IMS101	Nucleoside-diphosphate-sugar epimerases	KO:K01710	pfam01370
TCCM_0011.00000260	2058400	2728600	2276700	6545700	4249700	21169000	3758200	0	4472300	3645000	10081000	11593000	4018200	2183500	4361200	0	0	7281600	3251900	934520	2990600	4612700	6221000	8690600	7025300	6892200	2974500	8209400	3597400	0	176160	8841900	4391200	8163200	0	1112800	1273300	Bacteria;Cyanobacteria;unclassified;Oscillatoriales;unclassified;Trichodesmium;erythraeum;Trichodesmium erythraeum IMS101	ATP synthase, F1 epsilon subunit (delta in mitochondria)	KO:K02114	pfam02823
TCCM_0053.00000040	3808100	1116900	5724500	6926700	8118800	12520000	2508100	933310	4626800	2932200	4324600	7099400	3240400	4215200	2049200	3370300	2154600	5081200	1701200	1016500	862240	3195900	4101900	4650200	4271200	2470100	2568400	3852600	4676700	981840	852450	3131100	3446700	2877700	760190	881050	3601700	Bacteria;Cyanobacteria;unclassified;Oscillatoriales;unclassified;Trichodesmium;erythraeum;Trichodesmium erythraeum IMS101	acetylglutamate kinase	KO:K00930	pfam00696
TCCM_0320.00000030	1776600	940570	3229300	812970	9376900	15839000	2477400	341440	1093800	1920800	4365000	5472600	4366600	5876600	2337000	2273100	1804100	4566100	1285500	765560	838750	1605900	2770500	4122000	3518400	2032300	1467400	3298800	3790800	748850	121200	2200600	1553900	1731900	439140	1841000	1230600	Bacteria;Cyanobacteria;unclassified;Oscillatoriales;unclassified;Trichodesmium;erythraeum;Trichodesmium erythraeum IMS101	Aminopeptidase N	KO:K01256	pfam01433
TCCM_0288.00000020	2888400	3750500	7077100	9412700	6211400	9173600	1774600	1046900	2766000	2117900	3653200	5242200	1888200	1412800	5926400	1158200	1885100	4230800	2005100	845050	1186600	3451800	3852700	4177900	2371800	3334000	3117600	3186100	3808000	107640	353580	2813000	2419900	1978200	2252500	5916100	0	Bacteria;Cyanobacteria;unclassified;Oscillatoriales;unclassified;Trichodesmium;erythraeum;Trichodesmium erythraeum IMS101	ABC-type metal ion transport system, periplasmic component/surface adhesin	KO:K02077	pfam01297
TCCM_0660.00000020	4134700	3532500	5428000	6068600	6673100	11048000	1726400	1805500	2800300	3672000	10018000	7219100	9553900	11233000	3235700	4041000	2185700	8824800	3842600	1697600	2069500	6665200	13014000	17725000	1834300	3404200	3357900	5490200	13252000	508010	325050	4616500	2954900	5857400	290420	201480	3823900	Bacteria;Cyanobacteria;unclassified;Oscillatoriales;unclassified;Trichodesmium;erythraeum;Trichodesmium erythraeum IMS101	translation elongation factor P	KO:K02356	pfam08207
TCCM_0784.00003340	94741000	26482000	38236000	29408000	85959000	140370000	29027000	57342000	107960000	122500000	61390000	60671000	31810000	33312000	30231000	67042000	55366000	97681000	22596000	0	11889000	0	0	51491000	36462000	0	0	0	0	0	0	0	32391000	33594000	6005900	13514000	5015000	Eukaryota;Arthropoda;Insecta;Diptera;Drosophilidae;Drosophila;melanogaster;Drosophila melanogaster y; cn bw sp	F0F1-type ATP synthase, beta subunit	KO:K02133	pfam00006
TCCM_0198.00000050	0	43522000	15251000	39824000	23794000	54886000	17662000	6713400	19962000	37290000	1374300	20137000	20312000	21113000	10021000	41567000	15186000	28366000	20440000	1660300	9203300	12160000	15955000	13310000	9373200	9602100	9412600	3168400	14663000	8734300	15713000	31990000	10137000	695130	0	5172000	8509700	Bacteria;Cyanobacteria;unclassified;Oscillatoriales;unclassified;Trichodesmium;erythraeum;Trichodesmium erythraeum IMS101	Photosystem I reaction centre subunit XI.	KO:K02699	pfam02605
TCCM_0899.00000020	773850	1454300	2595000	4802100	2984600	3829700	397060	676320	1709300	1282400	2301500	2542900	2011600	1462000	322560	4637300	3803700	8933700	1755100	2390300	1474100	2682300	2753200	8946500	1201500	2177000	2159900	1522300	5130900	94812	418840	2894500	3953300	288590	1175000	7372800	0	Bacteria;Firmicutes;Bacilli;Bacillales;Bacillaceae;Bacillus;atrophaeus;Bacillus atrophaeus 1942	Acyl carrier protein	KO:K02078	pfam00550
TCCM_0117.00000040	7506900	12262000	12251000	17427000	22600000	24007000	5824100	4384100	7804200	10577000	0	0	7084100	10824000	4959400	8566200	5641500	12043000	7692100	466900	122970	9754900	15844000	0	103590	12706000	7775000	118060	206940	1510000	633700	10759000	217780	259940	3059800	14373000	2941300	Bacteria;Cyanobacteria;unclassified;Chroococcales;unclassified;Cyanothece;sp.;Cyanothece sp. CCY 0110	Muconolactone delta-isomerase	KO:K03464	pfam02426
TCCM_0108.00000160	3657300	3243400	2898700	2767600	3291300	7577000	1055300	648680	926930	838790	880680	0	2136400	1774000	2110700	986890	1025800	2083500	1495800	385710	103270	2641500	4933400	1472900	187290	3576800	2573800	905770	1436500	140930	269690	2389100	471180	113210	838450	2628600	1324100	Bacteria;Cyanobacteria;unclassified;Oscillatoriales;unclassified;Trichodesmium;erythraeum;Trichodesmium erythraeum IMS101	transcription termination factor NusA	KO:K02600	pfam08529
TCCM_0407.00000500	5593200	4193100	5037100	6438500	7867500	11569000	2189400	1988300	3539400	3822400	6797900	3488500	3810400	4588700	1644400	2757800	1712500	4608700	2675400	1489100	904000	5024300	8170200	4027700	1911600	4556700	3393300	2820400	4533400	788090	488680	3885000	2055500	2463400	1578000	3196800	2445800	Bacteria;Cyanobacteria;unclassified;Oscillatoriales;unclassified;Trichodesmium;erythraeum;Trichodesmium erythraeum IMS101	Asp-tRNAAsn/Glu-tRNAGln amidotransferase A subunit and related amidases	KO:K02433	pfam01425
TCCM_0699.00000180	581210	4523700	5052700	4022100	8178400	7308400	1601800	1226500	2392100	1873400	3262700	3484000	2202000	754190	5626800	1326300	1112500	4022600	3002700	725500	480360	5233300	8298400	3285400	2152000	5790100	3991500	2303900	3073300	797540	1001000	5948500	2246400	1420300	0	1201100	1953500	Bacteria;Cyanobacteria;unclassified;Oscillatoriales;unclassified;Trichodesmium;erythraeum;Trichodesmium erythraeum IMS101	Glyceraldehyde-3-phosphate dehydrogenase/erythrose-4-phosphate dehydrogenase	KO:K00134	pfam00044
TCCM_0013.00000070	7575600	9401100	11006000	12496000	15302000	22967000	2711800	2009800	1804500	813250	6086200	4454600	4702100	5409300	5967800	4917400	3844100	4126400	5125700	3068200	3102200	6097900	6609200	10475000	4023800	5832500	4059700	4799900	8227300	726340	440630	6366500	6904500	3721000	1711000	5029300	736080	Bacteria;Cyanobacteria;unclassified;Oscillatoriales;unclassified;Trichodesmium;erythraeum;Trichodesmium erythraeum IMS101	TRAP-type mannitol/chloroaromatic compound transport system, periplasmic component		pfam03480
TCCM_0003.00000250	1756600	920040	3262600	3141500	1855200	3286100	251690	57917	1028200	103280	371020	973230	1712400	2189300	1808500	393450	1154200	1914300	926530	253780	69774	1572300	1919200	995890	913420	1802100	1060300	684460	1121400	14938	164560	1325500	932610	421380	231950	1607800	3213600	Bacteria;Cyanobacteria;unclassified;Oscillatoriales;unclassified;Trichodesmium;erythraeum;Trichodesmium erythraeum IMS101	Mannosyl oligosaccharide glucosidase.		pfam03200
TCCM_0929.00000020	1973800	1405100	1856200	1495800	3947500	4414900	1045100	357730	1528900	1434600	1663100	1484500	853170	1432200	932830	1441100	981000	1868300	1101900	349550	228410	2360700	2045800	1621600	994340	1485600	821060	683980	1531200	283730	197270	1543500	1066500	732860	751110	1629000	1482300	Bacteria;Cyanobacteria;unclassified;Oscillatoriales;unclassified;Trichodesmium;erythraeum;Trichodesmium erythraeum IMS101	ABC-type dipeptide transport system, periplasmic component	KO:K02035	pfam00496
TCCM_0699.00000010	0	3392100	3660800	2896800	5439100	5990600	871950	0	312470	0	383170	353770	845710	1275300	1532800	1989000	176570	902220	395990	190300	90621	1132000	2618200	339560	193350	1350800	1287800	123880	402800	0	0	772070	291700	261240	725960	1527200	0	Bacteria;Cyanobacteria;unclassified;Oscillatoriales;unclassified;Trichodesmium;erythraeum;Trichodesmium erythraeum IMS101	Predicted nucleoside-diphosphate-sugar epimerases		pfam08547
TCCM_0253.00000030	0	0	0	392790	856050	4824600	1821200	0	0	0	1491100	2315500	980620	1194400	1699100	1617000	0	562950	741220	208980	639300	1688000	3040300	3198600	1066600	2406800	752970	1111000	2359000	0	9008.3	845670	870320	1575600	0	0	0	Bacteria;Cyanobacteria;unclassified;Oscillatoriales;unclassified;Trichodesmium;erythraeum;Trichodesmium erythraeum IMS101	ribosomal protein S15, bacterial/organelle	KO:K02956	pfam00312
TCCM_0278.00000030	2653200	3874200	4368300	4255300	4019000	6091400	555420	620070	2382700	1227100	849350	932040	2377400	2815800	2327300	2218100	1695400	2186500	1820700	551360	363150	2094800	2705600	1537400	2574300	2560800	1891400	1965200	1853800	440010	391380	2388400	1343300	986900	1026100	2387300	918040	Bacteria;Cyanobacteria;unclassified;Oscillatoriales;unclassified;Trichodesmium;erythraeum;Trichodesmium erythraeum IMS101	acetolactate synthase, small subunit		pfam10369
TCCM_0962.00000030	1750900	3603600	5268700	7760400	4352400	5171800	592720	1484400	3396400	3946800	7721100	6471700	3937700	2415400	2020700	4565000	3364700	7086400	3229300	1790200	1399400	4942600	9589500	6666200	4092800	5357100	3962800	6126400	4873900	114870	963220	6685800	3700400	4149200	878770	3189700	866040	Bacteria;Cyanobacteria;unclassified;Oscillatoriales;unclassified;Trichodesmium;erythraeum;Trichodesmium erythraeum IMS101	5''/3''-nucleotidase SurE	KO:K03787	pfam01975
TCCM_0021.00000020	239650	1619200	2064900	2331700	2013600	2741100	248950	323620	610870	456530	2820000	2331000	1223400	1127100	931870	764060	572990	2833300	0	580550	584990	459860	436140	1878800	1294500	583730	456770	2902000	1157500	33801	0	804550	1513100	1704400	181570	272920	0	Bacteria;Cyanobacteria;unclassified;Oscillatoriales;unclassified;Trichodesmium;erythraeum;Trichodesmium erythraeum IMS101	Intein/homing endonuclease	KO:K00524	pfam14528
TCCM_0816.00000010	141990	0	0	0	245790	466960	0	1672600	2680900	8073400	15313000	11017000	0	0	220560	12930000	9177400	18780000	9207600	3850200	3378000	8358300	21500000	14402000	9437400	16367000	5835400	10485000	12768000	260050	1505400	16029000	9897600	9269200	506990	0	0	Bacteria;Cyanobacteria;unclassified;Oscillatoriales;unclassified;Trichodesmium;erythraeum;Trichodesmium erythraeum IMS101	Uncharacterized protein conserved in bacteria
TCCM_0578.00000030	3026300	3827700	4644400	4477000	5506200	8790300	2158500	0	3056100	358610	3541900	3587700	1460100	1484800	1909500	937370	1345900	4059900	2266000	710750	892090	3967100	5374700	3509800	2426100	2958200	2088700	1896200	5626000	627820	1069800	3129000	1691400	2189300	1086100	2381300	280630	Bacteria;Cyanobacteria;unclassified;Oscillatoriales;unclassified;Trichodesmium;erythraeum;Trichodesmium erythraeum IMS101	protoporphyrinogen oxidase	KO:K00231	pfam01593
TCCM_0501.00002700	52466000	4086400	4091300	287570	8294800	13385000	3894300	27047000	56376000	41670000	2254500	0	571090	31499000	0	26939000	20287000	44524000	0	0	0	352110	0	0	0	0	0	0	0	0	0	0	2147000	3794200	0	0	0	Eukaryota;Arthropoda;Insecta;Coleoptera;Tenebrionidae;Tribolium;castaneum;Tribolium castaneum Georgia GA2	Myosin tail.	KO:K10352	pfam01576
TCCM_0686.00000160	1970600	7158700	10284000	7788100	13029000	14248000	3210000	2763700	4136500	5582200	4942200	5457500	2788800	3428800	4737300	6353500	4076300	7721700	2183400	1572400	1391500	2906400	5740700	5266300	4615700	2561200	1999000	5366500	4903100	551220	955880	4811100	3513500	1879200	62516	402940	463330	Bacteria;Cyanobacteria;unclassified;Oscillatoriales;unclassified;Trichodesmium;erythraeum;Trichodesmium erythraeum IMS101	phospho-2-dehydro-3-deoxyheptonate aldolase	KO:K03856	pfam00793
TCCM_0355.00000010	1423600	1945700	2948400	3215300	4794000	6437200	1273400	992340	1525800	361000	3412700	4579800	1609300	1894600	1646500	2887900	2653000	6358700	3953700	1222400	1459800	3604300	4949500	5818500	4776100	3810000	2407000	2617200	4078900	48377	1379900	2975200	3171700	2419700	849620	2813100	1573300	Bacteria;Cyanobacteria;unclassified;Oscillatoriales;unclassified;Trichodesmium;erythraeum;Trichodesmium erythraeum IMS101	urea ABC transporter, urea binding protein	KO:K11959	pfam13433
TCCM_0160.00000040	2119600	3438300	5981600	6724700	9970000	9606100	2650300	1019700	3063100	1047900	5857700	10230000	3707300	6181700	3051200	4513600	3353000	5144300	2532300	2000700	1644200	3138300	4491300	5751400	4154200	4388400	2724000	4056600	6619100	1134700	0	3858700	4602100	4125400	2697700	5260900	4296600	Bacteria;Cyanobacteria;unclassified;Oscillatoriales;unclassified;Trichodesmium;erythraeum;Trichodesmium erythraeum IMS101	Peroxiredoxin	KO:K03564	pfam00578
TCCM_0072.00000290	618370	1526500	2636100	2004700	2415200	3390600	288240	254400	983590	1464400	5971800	5696200	1246100	1596000	650150	2907500	2358800	5651900	1919000	1310500	1461900	4064600	5103200	4335300	2501000	3425000	2068400	4038300	5388600	0	392980	2968300	3429100	3495100	266240	616230	0	Bacteria;Cyanobacteria;unclassified;Oscillatoriales;unclassified;Trichodesmium;erythraeum;Trichodesmium erythraeum IMS101	Nucleoside-diphosphate-sugar epimerases	KO:K01784	pfam01370
TCCM_0812.00003380	7538700	6174500	8510200	8391900	5508000	9108200	1772700	2046100	4724500	0	5582500	10869000	3816600	3715200	5343400	3319500	3690700	10074000	3527800	1971300	2152800	5254000	10211000	10657000	6416500	6965700	4261400	6572600	6286800	1084200	1896700	7077800	4585700	547750	1296900	1878900	3877800	Bacteria;Cyanobacteria;unclassified;Oscillatoriales;unclassified;Trichodesmium;erythraeum;Trichodesmium erythraeum IMS101	Cyclopropane fatty acid synthase and related methyltransferases		pfam12847
TCCM_0675.00000020	0	3691500	4496400	4791600	3002400	7877200	1849600	0	0	0	3028300	1748700	3497700	2205200	2807800	1087100	2335900	2896700	2483000	678100	531660	3638000	5936600	4649200	2165600	3250100	2105700	1913000	3633900	122770	1376800	3129900	1856800	1330500	1252200	2083100	1065800	Bacteria;Cyanobacteria;unclassified;Oscillatoriales;unclassified;Trichodesmium;erythraeum;Trichodesmium erythraeum IMS101	Uncharacterized conserved protein		pfam01936
TCCM_0283.00000020	3700300	8053500	7301300	8214800	6758200	9775500	1548700	161990	358000	1202000	463830	762040	3297400	4431700	1869200	955420	612110	1594100	485110	0	0	663090	2092900	438990	644140	1234700	1040400	429930	200140	1004500	0	1102100	445700	422690	263270	1471200	1046900	Bacteria;Cyanobacteria;unclassified;Oscillatoriales;unclassified;Trichodesmium;erythraeum;Trichodesmium erythraeum IMS101	Zn-dependent oligopeptidases	KO:K01414	pfam01432
TCCM_0702.00000030	5150300	3500200	7433900	5437900	7144500	13278000	1999700	1454900	3107600	3448600	8233400	9173300	2958800	3750000	2682500	3587100	3980100	6503100	3064100	1875300	1877200	3171700	5152400	6694700	5751700	3983000	2467900	4687300	6308300	0	0	3080200	4590500	3547900	773270	2822900	0	Bacteria;Cyanobacteria;unclassified;Oscillatoriales;unclassified;Trichodesmium;erythraeum;Trichodesmium erythraeum IMS101	beta-hydroxyacyl-[acyl carrier protein] dehydratase FabZ	KO:K02372	pfam07977
TCCM_0823.00000360	1595700	2780100	2697200	2769000	3633200	6525600	1414900	613850	2375900	625660	1835800	1850300	1512100	1712200	1461800	2098000	1583100	1754600	1599100	623970	766100	1712300	3513900	1902400	1526700	2279100	1765100	1542000	1980000	12360	76475	1959600	1247000	1142700	695420	2650600	1126000	Bacteria;Cyanobacteria;unclassified;Oscillatoriales;unclassified;Trichodesmium;erythraeum;Trichodesmium erythraeum IMS101	Predicted oxidoreductases (related to aryl-alcohol dehydrogenases)	KO:K05885	pfam00248
TCCM_0523.00001390	22758000	10193000	7574600	2512300	11776000	11183000	7809700	38945000	81014000	95083000	0	143000	594860	9907500	2065400	36402000	26204000	42343000	2182100	0	0	0	1709800	710640	564490	0	0	0	0	0	0	1092700	1097200	448870	0	340380	0	Eukaryota;Arthropoda;Insecta;Diptera;Culicidae;Aedes;aegypti;Aedes aegypti Liverpool	Myosin heavy chain	KO:K10352	pfam00063
TCCM_0879.00000670	4809500	0	3338300	3337300	8717800	13586000	1700000	1461900	1349600	2616200	6924200	6236200	1290800	2093500	1973800	8353900	3657200	6481200	7256500	1748000	3868800	12239000	18030000	13676000	7975000	6632600	7093700	10631000	8935400	71020	113550	9125600	7927400	6996600	1320700	0	0	Bacteria;Cyanobacteria;unclassified;Oscillatoriales;unclassified;Trichodesmium;erythraeum;Trichodesmium erythraeum IMS101	Predicted N-acetylglucosaminyl transferase		pfam13414
TCCM_0714.00000030	1096100	1184700	241440	861850	1477500	2039400	300110	777110	1397400	1456500	6105100	4820300	114180	136210	90760	2873700	1955700	5852400	1792500	899300	883350	2171300	4015900	3797800	2880800	2474900	1571300	2429200	3114700	0	777950	2911600	1857600	2615000	0	0	0	Bacteria;Cyanobacteria;unclassified;Chroococcales;unclassified;Acaryochloris;marina;Acaryochloris marina MBIC11017	Lipoxygenase.		pfam00305
TCCM_0064.00000210	1107800	1656000	2100600	3299900	2305600	6108800	985770	0	1412900	493340	1988900	3240800	1839000	2522100	754660	1230900	792130	2047600	685420	561590	880640	2082600	3882400	1773500	1188900	1565500	1549800	1942600	2570700	203500	74351	1664500	1951500	1612700	0	246890	2039300	Bacteria;Cyanobacteria;unclassified;Oscillatoriales;unclassified;Trichodesmium;erythraeum;Trichodesmium erythraeum IMS101	prolyl-tRNA synthetase, family II	KO:K01881	pfam00587
TCCM_0592.00000010	860620	1610800	2934800	1992800	2637100	3742900	514210	0	1113700	256580	1125600	1399400	1634400	2008300	880690	536250	87716	1471600	616130	250870	272510	1024500	1963500	1667700	1292500	1610700	936830	1755200	1905400	116650	0	855560	104870	400810	172270	295220	391680	Bacteria;Cyanobacteria;unclassified;Oscillatoriales;unclassified;Trichodesmium;erythraeum;Trichodesmium erythraeum IMS101	Phosphoenolpyruvate carboxylase	KO:K01595	pfam00311
TCCM_0827.00000220	7610100	7591800	6430300	7906100	17390000	21953000	4940000	1189400	3923900	4851900	7868800	6722500	9917200	12985000	9034100	3203600	1825600	8610800	2142900	2679200	2491200	7872600	12855000	5923200	8198800	7596200	6469000	9894900	9959200	3046900	2717900	6713000	6872800	3249600	786390	1613900	1840500	Bacteria;Cyanobacteria;unclassified;Oscillatoriales;unclassified;Trichodesmium;erythraeum;Trichodesmium erythraeum IMS101	Glyceraldehyde-3-phosphate dehydrogenase/erythrose-4-phosphate dehydrogenase	KO:K00134	pfam02800
TCCM_0308.00000030	3355700	6046100	11426000	7999500	9775300	13263000	2438200	1821100	2395100	3342400	7295300	3664800	4827000	5316200	3931000	2574600	1640700	5733000	2958500	2185900	2094900	3001500	4406700	6321600	5002000	4432000	3497300	4711800	7098100	801150	1660000	4926600	5147500	3093200	831960	1396800	2297900	Bacteria;Cyanobacteria;unclassified;Oscillatoriales;unclassified;Trichodesmium;erythraeum;Trichodesmium erythraeum IMS101	Nucleoside-diphosphate-sugar epimerases	KO:K02377	pfam01370
TCCM_0034.00000250	9143400	0	0	0	21605000	23324000	4219500	3336200	0	7925500	12365000	25949000	5597400	8142400	4685900	6713800	0	15310000	4449000	0	0	3861200	7753000	10528000	0	4113100	3061400	0	0	917350	1275200	5941000	4783500	6518600	0	0	0	Bacteria;Cyanobacteria;unclassified;Oscillatoriales;unclassified;Trichodesmium;erythraeum;Trichodesmium erythraeum IMS101	Cytochrome b subunit of the bc complex	KO:K02635	pfam00033
TCCM_0677.00000020	1098700	2195500	1279000	2089600	3155700	3840500	973070	371530	322910	0	2313300	1038400	1521300	2014200	1372900	459150	423970	1550700	936690	185770	188320	1581400	3507300	1224600	1824900	2115800	1793500	2116200	1874200	122280	174750	1251600	1002400	1300800	325800	744780	385930	Bacteria;Cyanobacteria;unclassified;Oscillatoriales;unclassified;Trichodesmium;erythraeum;Trichodesmium erythraeum IMS101	cysteinyl-tRNA synthetase	KO:K01883	pfam01406
TCCM_0899.00005240	0	0	0	0	634100	749970	0	0	879830	1547300	4404400	3967100	0	0	0	574180	1504300	5680800	0	1101700	1379200	0	0	3347100	2564700	0	0	2177000	2162400	0	0	0	2545900	4370700	0	0	0	Bacteria;Proteobacteria;Gammaproteobacteria;Alteromonadales;Alteromonadaceae;Saccharophagus;degradans;Saccharophagus degradans 2-40	Putative multicopper oxidases		pfam07732
TCCM_0530.00000210	4569400	5621500	8998800	9567200	6948900	10693000	1924000	463900	4367000	1031300	2651300	2157400	4516100	2965800	4053400	2373900	2717500	3950100	1764800	489810	653060	3840100	5405100	3435300	1067100	2804700	3421400	2152800	2722300	258150	158190	2252500	1593200	2647400	1386100	3514200	3999600	Bacteria;Cyanobacteria;unclassified;Oscillatoriales;unclassified;Trichodesmium;erythraeum;Trichodesmium erythraeum IMS101	triosephosphate isomerase	KO:K01803	pfam00121
TCCM_0747.00000150	4576100	2665300	3624000	5408400	8297400	11050000	1793400	855850	346620	1179700	4235300	5033800	3582800	3017000	4138600	3209300	1633000	4600000	740420	1369200	1393200	1113800	1708100	7403200	4979400	1600100	848870	2835900	4175100	43633	44878	1493900	2216900	2201600	0	455950	293780	Bacteria;Cyanobacteria;unclassified;Oscillatoriales;unclassified;Trichodesmium;erythraeum;Trichodesmium erythraeum IMS101	ribosomal protein S6	KO:K02990	pfam01250
TCCM_0165.00000010	2142600	6335700	11426000	10579000	14305000	20312000	1981300	1052900	1865500	1035700	4248600	255630	6230600	7308000	3720800	5061200	3117900	10858000	4925200	826450	1322900	7569100	13926000	4024900	845870	9117900	5106400	3286400	3346900	992660	528400	7148500	2425400	3468700	1515700	4859500	3616500	Bacteria;Cyanobacteria;unclassified;Oscillatoriales;unclassified;Trichodesmium;erythraeum;Trichodesmium erythraeum IMS101	Uncharacterized protein conserved in bacteria		pfam07386
TCCM_0274.00000010	5450400	5144700	4999400	5152600	5577100	7389200	1498900	412220	3163900	2550200	4742200	4478400	5082400	4880200	1574900	2179100	2847500	6140700	1016700	716880	1531000	2629400	2502000	4842500	2996000	1832100	1070800	3404300	5685500	600140	414360	1794800	3623200	1962800	610510	2887200	2595100	Bacteria;Cyanobacteria;unclassified;Oscillatoriales;unclassified;Trichodesmium;erythraeum;Trichodesmium erythraeum IMS101	5''-deoxy-5''-methylthioadenosine phosphorylase	KO:K00772	pfam01048
TCCM_0697.00000200	7283800	8095600	8532900	8411000	17072000	26738000	6118000	0	8574200	6680300	13023000	18534000	8450600	9524500	6706200	8000500	5882400	15008000	2663500	2574000	3074300	6332800	15069000	17230000	10503000	5701700	4300100	10724000	9820200	0	142940	5305200	7384100	5628800	935690	3946800	0	Bacteria;Cyanobacteria;unclassified;Oscillatoriales;unclassified;Trichodesmium;erythraeum;Trichodesmium erythraeum IMS101	Carbon dioxide concentrating mechanism/carboxysome shell protein		pfam00936
TCCM_0447.00000020	3903600	4703900	6923800	9664400	12172000	21327000	2867900	2088300	4640800	6053700	4725700	5681900	6270300	9463100	2990600	4056600	3247300	8187400	1931100	994040	1104300	4637900	5351900	4175900	2588000	2096300	3128600	5392700	4356800	1316500	494630	2725600	2183600	2538700	277590	1653400	604450	Bacteria;Cyanobacteria;unclassified;Oscillatoriales;unclassified;Trichodesmium;erythraeum;Trichodesmium erythraeum IMS101	Choline dehydrogenase and related flavoproteins		pfam05199
TCCM_0152.00000230	2266100	1569400	4905300	4656800	4497200	6090200	1539700	231200	1535500	2729600	1645600	2131900	1825900	3754800	1912500	636650	277420	2598800	1075900	418730	401560	1411800	2893900	2070400	1041500	1542600	1010200	2492000	3128400	383580	768280	1395200	1424400	488620	721340	2735000	2050400	Bacteria;Cyanobacteria;unclassified;Oscillatoriales;unclassified;Trichodesmium;erythraeum;Trichodesmium erythraeum IMS101	aspartyl-tRNA synthetase, bacterial type	KO:K01876	pfam00152
TCCM_0466.00000010	1339300	0	1226700	1201200	3960900	3831700	979730	782680	1064600	1172500	2059800	1669400	2394900	2348000	1181900	1067600	376860	1316500	1090800	249850	371980	1773300	2690000	1888800	1342400	1465300	1554100	1997500	1886700	263640	396860	1735800	217140	842540	273790	1145900	601330	Bacteria;Cyanobacteria;unclassified;Oscillatoriales;unclassified;Trichodesmium;erythraeum;Trichodesmium erythraeum IMS101	endopeptidase Clp ATP-binding regulatory subunit (clpX)	KO:K03544	pfam07724
TCCM_0747.00000040	8710600	14099000	23758000	12261000	1732700	1826800	14995	267440	703700	0	0	112510	2677600	2895100	7016000	1026700	813730	660230	946530	155170	164820	666750	6247600	1372000	874760	1288700	561030	259070	723920	2627100	493780	1883400	695300	489510	2213000	4726700	0	Bacteria;Cyanobacteria;unclassified;Oscillatoriales;unclassified;Trichodesmium;erythraeum;Trichodesmium erythraeum IMS101	3-dehydroquinate synthetase	KO:K01735	pfam01761
TCCM_0045.00000090	1082000	1612000	6469600	5816300	4411200	9618500	2452200	0	1535700	1045400	6898200	4955700	2626800	3291800	1957100	2077200	2030400	2492300	3415300	926770	1498300	5010700	4894400	6223900	4741400	4099800	3131800	4808300	4984300	625700	220320	3567800	2959500	3519300	151920	1833500	0	Bacteria;Cyanobacteria;unclassified;Oscillatoriales;unclassified;Trichodesmium;erythraeum;Trichodesmium erythraeum IMS101	RIP metalloprotease RseP/RIP metalloprotease RseP		pfam02163
TCCM_0540.00000030	668900	379850	1293900	1837800	2394000	4847900	588940	192050	2345200	1849500	1165800	1287900	2073100	2624100	635230	1156900	424740	1053200	1105900	317000	439010	1366800	2739700	2157300	662390	1927600	1382800	655260	1819700	191290	180250	1199700	858300	708160	187490	205360	0	Bacteria;Cyanobacteria;unclassified;Oscillatoriales;unclassified;Trichodesmium;erythraeum;Trichodesmium erythraeum IMS101	chorismate synthase	KO:K01736	pfam01264
TCCM_0730.00000040	2074000	2957600	4250900	5050600	6365500	11894000	2198600	830880	1998600	3551700	2713400	3312600	4932100	4768300	2752900	3206900	1232100	3698400	805840	726340	612840	1103400	4971400	2847600	1798700	2479800	942730	2931200	3482900	562740	0	2082000	1085300	1787200	557280	3165300	785790	Bacteria;Cyanobacteria;unclassified;Oscillatoriales;unclassified;Trichodesmium;erythraeum;Trichodesmium erythraeum IMS101	L-asparaginase II	KO:K01424	pfam06089
TCCM_0824.00000300	1611100	1159800	1297600	1622000	1390500	2726500	299090	1197300	2054400	2286600	4325700	2237000	310900	381350	883240	2293100	1641800	3930900	1061700	571810	752330	2017900	3218700	1534500	1650500	1635800	1137500	1495200	3384400	0	200140	1716200	1730200	1500400	0	235030	0
TCCM_0076.00000250	4606500	822800	1329900	8075500	3191500	4658500	1192000	0	0	3814700	5032000	9785700	3592600	4997500	757700	2175000	1443600	125010	168640	1045600	1556800	2180200	2373600	5233100	3029700	2784000	1730000	8034800	8238500	208860	484240	1756200	4604200	3330200	1110000	0	0	Bacteria;Cyanobacteria;unclassified;Oscillatoriales;unclassified;Trichodesmium;erythraeum;Trichodesmium erythraeum IMS101	Secreted and surface protein containing fasciclin-like repeats		pfam02469
TCCM_0545.00000290	0	0	125490000	128290000	270960000	322300000	58756000	34201000	0	78618000	162560000	121740000	84612000	116290000	0	83167000	56558000	137970000	0	45613000	33391000	0	163680000	171130000	0	89719000	51891000	83831000	137960000	8315400	25220000	74949000	58861000	102900000	0	33877000	0	Bacteria;Cyanobacteria;unclassified;Oscillatoriales;unclassified;Trichodesmium;erythraeum;Trichodesmium erythraeum IMS101	F0F1-type ATP synthase, beta subunit	KO:K02112	pfam02874
TCCM_0382.00000020	508520	1391600	2237300	3871700	4529700	6361000	913580	869650	1792000	1631700	4049500	3072600	2303300	3060600	2168200	1336500	1089800	2576500	772010	675410	1007100	2302200	2318600	3365300	2376600	1307000	1583000	2503100	2904400	324100	50469	1259000	1965800	1867200	394450	980360	893060	Bacteria;Cyanobacteria;unclassified;Oscillatoriales;unclassified;Trichodesmium;erythraeum;Trichodesmium erythraeum IMS101	seryl-tRNA synthetase	KO:K01875	pfam00587
TCCM_0241.00000420	2944700	4520800	4280500	4616700	5797400	6808200	1337100	479070	2147800	2045300	3992700	2688900	3037700	1680400	2643700	1691900	1575800	2034500	2084000	699930	659560	3364300	3902100	3412400	809200	4074100	2902100	1791000	3147400	799390	510850	5679100	679870	1953100	0	1930100	1833400	Bacteria;Cyanobacteria;unclassified;Oscillatoriales;unclassified;Trichodesmium;erythraeum;Trichodesmium erythraeum IMS101	Lipoprotein NlpI, contains TPR repeats		pfam13414
TCCM_0503.00000110	324150	2452200	4827500	3737000	3193600	5758900	1172000	463030	1072300	486400	1514000	1232000	1932500	2378000	1348600	1483000	961120	1443800	1700400	356210	372650	2021200	3712600	2091600	1327800	1628300	1330900	1304200	1844000	515640	351010	1860200	1787600	1540900	1258900	2030200	1389500	Bacteria;Cyanobacteria;unclassified;Oscillatoriales;unclassified;Trichodesmium;erythraeum;Trichodesmium erythraeum IMS101	Outer membrane protein/protective antigen OMA87	KO:K07277	pfam01103
TCCM_0454.00000290	1032700	0	1726900	1821100	4765900	7822900	1547000	1179400	521860	945810	2628900	3222600	942480	1440300	391300	3539200	2108300	5171100	399600	1614200	928160	390320	882720	2603500	2204700	861590	257940	1999500	3213500	0	0	1234100	2067000	1859900	246280	0	0	Bacteria;Cyanobacteria;unclassified;Chroococcales;unclassified;Cyanothece;sp.;Cyanothece sp. PCC 7822
TCCM_0762.00000230	2621100	1642600	7523300	5321500	9398900	12564000	2601400	1060400	3216400	3690000	6194900	5656600	5462200	4784600	3971500	4193100	2060000	6535200	4190000	1365000	1537200	5718500	8181400	3877600	2954300	5859000	5115800	6500300	5024300	2324700	1993200	4874000	2912500	2453800	1089600	5197100	4011100	Bacteria;Cyanobacteria;unclassified;Oscillatoriales;unclassified;Trichodesmium;erythraeum;Trichodesmium erythraeum IMS101	Predicted oxidoreductases (related to aryl-alcohol dehydrogenases)		pfam00248
TCCM_0158.00000030	1292600	336980	178050	1392300	3700500	5451400	811240	437810	1544900	1189200	3754300	3278700	2050000	2547300	1496500	1516800	534620	2532100	1028100	559290	583810	2777000	4675600	1941400	1775400	2510400	1587600	2230400	3304000	485530	377470	2251300	1261700	1802900	571420	952640	2421600	Bacteria;Cyanobacteria;unclassified;Oscillatoriales;unclassified;Trichodesmium;erythraeum;Trichodesmium erythraeum IMS101	signal recognition particle-docking protein FtsY	KO:K03110	pfam00448
TCCM_0467.00000020	1636700	2651100	4196200	3850700	5412400	6317400	1894300	601770	1108000	0	355540	469240	2190300	2213600	1566400	2261800	0	2072000	2295500	185550	239220	2831400	6600400	1144400	315270	3417800	2608400	159000	1303900	469520	398980	3152300	608510	270900	911070	1674600	621570	Bacteria;Cyanobacteria;unclassified;Oscillatoriales;unclassified;Trichodesmium;erythraeum;Trichodesmium erythraeum IMS101	Uncharacterized protein conserved in bacteria		pfam07005
TCCM_0950.00000360	0	65132000	77138000	99318000	122910000	232410000	35388000	17613000	0	41145000	90300000	75308000	41326000	52057000	64427000	46139000	41412000	98870000	0	13400000	15412000	0	0	65522000	0	47402000	28207000	49755000	58991000	7027200	16029000	0	32167000	38405000	0	41263000	0	Bacteria;Cyanobacteria;unclassified;Oscillatoriales;unclassified;Trichodesmium;erythraeum;Trichodesmium erythraeum IMS101	S-adenosylhomocysteine hydrolase	KO:K01251	pfam05221
TCCM_0357.00000030	2074200	4802900	6013600	6016300	5218400	8583900	1236900	779240	2670900	3034400	3159800	2132600	2798800	3102200	3846800	1686400	1959900	4639900	2009800	559650	898890	2067300	4701700	4403500	1220100	2190800	1661400	2312900	2275300	777940	544390	2722800	1983200	1184100	267850	648960	398140	Bacteria;Cyanobacteria;unclassified;Oscillatoriales;unclassified;Trichodesmium;erythraeum;Trichodesmium erythraeum IMS101	anthranilate phosphoribosyltransferase	KO:K00766	pfam00591
TCCM_0372.00001170	0	677850	1664600	1887700	2874600	4133800	632300	0	1214000	1202700	9192200	11821000	2979800	2850300	1048600	2950100	2645700	5624000	1911300	1987500	1871100	6392700	5757700	9183000	7125500	2129900	6074100	8912400	10056000	0	206740	5443400	5971700	9719000	175690	0	0	Bacteria;Cyanobacteria;unclassified;Oscillatoriales;unclassified;Trichodesmium;erythraeum;Trichodesmium erythraeum IMS101	Predicted glutathione S-transferase	KO:K07393	pfam13409
TCCM_0265.00000050	960810	3473100	4217800	6234800	4922100	6645700	780420	0	0	921770	905390	1815700	3373400	2468800	2810900	1883600	731960	2448600	1559200	412180	555410	1642200	3587300	1441500	677450	2322400	1806000	1279500	1189100	561460	97485	2124900	1325700	605880	130790	1032700	1926000	Bacteria;Cyanobacteria;unclassified;Oscillatoriales;unclassified;Trichodesmium;erythraeum;Trichodesmium erythraeum IMS101	phosphate/phosphite/phosphonate ABC transporters, periplasmic binding protein	KO:K02044	pfam12974
TCCM_0070.00000030	7187000	7286200	12328000	10697000	7365800	18382000	3675500	1370300	3916800	5404500	8544500	8124600	4837200	6708000	6690800	5531600	3838600	5216900	2914100	459990	1378500	3476700	6376200	5792100	3821400	3569400	2871000	3064500	5947900	3107100	1815300	5100300	3836900	2485100	0	0	4730300	Bacteria;Proteobacteria;Gammaproteobacteria;Thiotrichales;Thiotrichaceae;Beggiatoa;sp.;Beggiatoa sp. PS	Methylase involved in ubiquinone/menaquinone biosynthesis		pfam12847
TCCM_0682.00000120	141520	0	0	0	9018100	15439000	4286300	0	2997400	0	6711500	12165000	2831000	2965700	5578500	3021700	0	5673700	52285	1476400	1993800	1019300	1831300	9505000	5678300	1331800	1541400	5265500	6256400	329310	444040	741490	534310	8164700	0	0	0	Bacteria;Cyanobacteria;unclassified;Oscillatoriales;unclassified;Trichodesmium;erythraeum;Trichodesmium erythraeum IMS101	ribosomal protein L24, bacterial/organelle	KO:K02895	pfam00467
TCCM_0025.00000040	1987400	1683600	5585400	5705000	8411700	15009000	1988300	979600	2663600	2644700	3206600	3160700	2707100	3499700	907850	2637600	1914800	5924900	1476400	518210	485220	1629400	2187600	3136500	1387000	2433600	690330	1617000	2521800	579040	774700	2905100	1507300	1228800	2042300	4644900	2609900	Bacteria;Cyanobacteria;unclassified;Oscillatoriales;unclassified;Trichodesmium;erythraeum;Trichodesmium erythraeum IMS101
TCCM_0679.00004240	1670300	2079400	2453400	767160	2634200	1154900	966450	0	471340	0	1416700	2125300	1962800	6007500	2993500	656060	455600	413900	769350	1997000	1776800	4699100	1076000	2856000	955870	1573700	0	5239900	2940100	0	0	1300700	2276200	1034200	0	0	0	Bacteria;Proteobacteria;Alphaproteobacteria;Rhizobiales;Methylobacteriaceae;Methylobacterium;nodulans;Methylobacterium nodulans ORS 2060
TCCM_0373.00000020	826440	904440	2570300	1557200	1689400	1836200	328410	274240	1644600	1213600	890090	540350	846060	1842900	1201900	1105900	1290900	2126700	596400	373090	420780	903190	2104400	1483900	566960	1341300	705010	364510	1113700	43069	185450	634000	453180	762440	0	0	37695	Bacteria;Cyanobacteria;unclassified;Oscillatoriales;unclassified;Trichodesmium;erythraeum;Trichodesmium erythraeum IMS101	GMP synthase (glutamine-hydrolyzing), N-terminal domain or A subunit	KO:K01951	pfam00117
TCCM_0320.00000060	2396100	2692300	3505900	3664800	4765300	6415100	2313400	774670	3232300	2839100	3236400	2635200	2253000	2545200	3488100	2172600	1793700	3527900	1296600	768320	896440	2452800	4920400	2836000	1544600	3105600	1349600	1905800	3011200	422990	770050	2033500	1051000	1350600	319550	606110	0	Bacteria;Cyanobacteria;unclassified;Oscillatoriales;unclassified;Trichodesmium;erythraeum;Trichodesmium erythraeum IMS101	Aspartate/tyrosine/aromatic aminotransferase	KO:K00812	pfam00155
TCCM_0054.00000320	775490	0	1144100	5209100	4367100	5660800	1310200	883430	1479200	1640700	2687900	3410700	1402300	1084200	3316200	3497500	1397000	5217900	1049500	587980	962110	2191400	3947400	4186100	1167700	3034100	2564000	1320700	3906600	636490	638090	2251700	1496900	1175100	803960	1653900	0	Bacteria;Cyanobacteria;unclassified;Oscillatoriales;unclassified;Trichodesmium;erythraeum;Trichodesmium erythraeum IMS101	Methylase involved in ubiquinone/menaquinone biosynthesis		pfam08241
TCCM_0451.00000130	928970	1290900	2935300	1949800	3160400	7146000	1361200	0	463420	0	2562200	1753000	2094400	2147700	1419200	973730	1149000	1724300	962640	499360	733710	1564100	2192600	2112500	1629700	2062000	1158800	1900200	1673800	504100	712120	1896200	366370	468920	843730	2398400	0	Bacteria;Cyanobacteria;unclassified;Oscillatoriales;unclassified;Trichodesmium;erythraeum;Trichodesmium erythraeum IMS101	arsenite-activated ATPase ArsA	KO:K01551	pfam02374
TCCM_0053.00000070	694790	676710	2008000	1727400	4611000	6578000	1441000	0	1233600	343910	1968800	2507600	1539400	2034600	710920	1047000	988090	1605300	1134000	411760	81664	1141000	2733600	2647700	1534700	1261400	1508600	1781300	2244900	458790	169210	944570	649180	452590	712210	1476900	742000	Bacteria;Cyanobacteria;unclassified;Oscillatoriales;unclassified;Trichodesmium;erythraeum;Trichodesmium erythraeum IMS101	cell shape determining protein, MreB/Mrl family	KO:K03569	pfam06723
TCCM_0376.00000430	0	0	0	0	0	0	0	833600	1131800	1542000	4941600	4785000	0	0	0	3002300	3230300	6705600	1477900	3247500	1994800	7461900	11178000	6980300	3913800	7881900	2753400	6330300	6140000	0	666180	7692100	1728800	2270700	1460900	0	0	Bacteria;Cyanobacteria;unclassified;Oscillatoriales;unclassified;Trichodesmium;erythraeum;Trichodesmium erythraeum IMS101	Flavin containing amine oxidoreductase.		pfam01593
TCCM_0380.00000140	2591100	2171200	3377600	5886100	4376700	6940000	1674000	0	105860	0	2838400	2622900	1746400	1816800	809480	1846400	1656500	2804100	1810800	474480	907100	2816400	5344700	2321200	1912400	3130800	2624900	2358500	2926800	458820	654640	2687300	1788000	1369700	578950	1693700	758510	Bacteria;Cyanobacteria;unclassified;Oscillatoriales;unclassified;Trichodesmium;erythraeum;Trichodesmium erythraeum IMS101	GTP-binding protein YchF	KO:K06942	pfam06071
TCCM_0203.00000060	2033100	6473900	0	7707200	7336500	14294000	2873600	0	3737100	3670900	2673000	6079200	4542000	6031600	6142300	6470300	4410900	10806000	4978600	958270	1221700	6597000	13983000	3848500	2015100	8479700	5238800	4524600	3317100	0	1884100	5981500	3247500	3261400	975270	2850700	0	Bacteria;Cyanobacteria;unclassified;Oscillatoriales;unclassified;Trichodesmium;erythraeum;Trichodesmium erythraeum IMS101	Delta-aminolevulinic acid dehydratase	KO:K01698	pfam00490
TCCM_0908.00000190	5208200	6493300	7881300	6116100	7625400	9572800	1829600	1701300	2509500	4612100	3334800	1804800	1050600	2628700	3823600	4810700	2846700	5958800	3719100	707420	453810	6295400	11272000	4949700	298400	6075600	4561300	3569600	4055200	563400	855880	6284800	1749400	1971800	1459400	3326100	0	Bacteria;Cyanobacteria;unclassified;Oscillatoriales;unclassified;Trichodesmium;erythraeum;Trichodesmium erythraeum IMS101	hydrogenase expression/formation protein HypE	KO:K04655	pfam02769
TCCM_0453.00000020	398720	0	1981700	2513900	1889100	4102300	480630	0	812140	152780	2109100	2337200	2275100	1061000	544260	1056900	705170	1307000	243380	316310	250330	1106000	1556200	2604600	1390100	1054900	919270	1963200	2482500	235840	506480	695120	1142400	549840	303870	1470900	2376500	Bacteria;Cyanobacteria;unclassified;Chroococcales;unclassified;Crocosphaera;watsonii;Crocosphaera watsonii WH 8501
TCCM_0954.00000020	3665300	4714000	4748700	7042200	7652400	11646000	3309000	1073500	1319900	2644700	10599000	6912200	4840200	6119400	3009000	3558200	919850	5749800	2143800	1363300	1603900	3656100	5446900	6324800	3913700	3586300	2180100	4576500	5991700	538880	828100	2976200	3725300	3774500	0	625860	2104300	Bacteria;Cyanobacteria;unclassified;Oscillatoriales;unclassified;Trichodesmium;erythraeum;Trichodesmium erythraeum IMS101	translation initiation factor IF-3	KO:K02520	pfam00707
TCCM_0660.00000090	0	0	0	0	0	0	0	0	0	0	0	0	0	0	0	38032000	0	0	72196000	0	0	61225000	74354000	0	0	94667000	19771000	685530	0	0	7634500	50294000	0	0	0	0	0
TCCM_0036.00000240	2774200	2265400	2525400	2315100	2826300	3981500	1359600	0	0	1232600	540960	682710	1888500	1503400	639250	1307300	1429900	3543900	2951900	453390	515140	3549400	6072100	2256100	1243300	3788200	2801900	1921500	2262500	777460	671030	3463400	1362800	510480	1102700	2347800	158650	Bacteria;Cyanobacteria;unclassified;Oscillatoriales;unclassified;Trichodesmium;erythraeum;Trichodesmium erythraeum IMS101	methionyl-tRNA synthetase	KO:K01874	pfam09334
TCCM_0250.00000200	2026100	4003700	8653100	8890500	9480300	12581000	3583600	1555200	4028300	3284200	2655900	5030100	5424600	6339400	3613300	3494700	3039500	6098100	3255600	1250700	821920	3385900	4720600	4868000	2791800	4233000	3133400	3586600	3131700	618740	0	2599200	2464800	1074700	1100900	3106200	0	Bacteria;Cyanobacteria;unclassified;Oscillatoriales;unclassified;Trichodesmium;erythraeum;Trichodesmium erythraeum IMS101	N-acetyl-gamma-glutamyl-phosphate reductase, common form	KO:K00145	pfam02774
TCCM_0151.00000140	5712600	344570	389360	440880	5822100	7905400	1106000	1160200	2071400	0	4090100	0	2148500	2692100	56469	0	0	6109100	1511800	501080	0	2158200	3936600	3492700	0	2326100	1218100	3056900	3150700	181200	0	2789700	1702500	1950000	103020	1943100	1060700	Bacteria;Cyanobacteria;unclassified;Oscillatoriales;unclassified;Trichodesmium;erythraeum;Trichodesmium erythraeum IMS101	ferredoxin [2Fe-2S]	KO:K02639	pfam00111
TCCM_0876.00000030	1213000	0	0	1289300	6115800	17454000	1026100	0	2646900	2035300	7560300	8419500	6644800	6534000	608650	1965700	1669300	5322700	229790	1578800	1850900	168030	2762000	14855000	3963900	1290100	89398	5631500	9165600	389750	224620	234930	5254900	2899900	530290	0	0	Bacteria;Cyanobacteria;unclassified;Oscillatoriales;unclassified;Trichodesmium;erythraeum;Trichodesmium erythraeum IMS101
TCCM_0098.00000030	941440	926260	1985000	1785200	1806100	3580200	669780	171380	394950	266340	2072600	1647000	1346500	1095400	421960	1196000	1239700	1772700	898420	316480	355200	1378700	2389200	1446900	732130	1616900	1147800	1140800	1669400	140400	279980	1248700	633870	591500	145270	1076000	803790	Bacteria;Cyanobacteria;unclassified;Oscillatoriales;unclassified;Trichodesmium;erythraeum;Trichodesmium erythraeum IMS101	Serine phosphatase RsbU, regulator of sigma subunit		pfam07228
TCCM_0162.00000140	0	0	557920	538910	1614100	2213800	299150	0	415970	476650	3319100	2066500	152360	379040	0	1862700	919640	3564300	665500	862610	1513200	3187100	3932900	2199300	3457600	2597700	2973000	1771200	2781900	0	98030	1704000	2359100	1681000	0	255080	688440	Bacteria;Cyanobacteria;unclassified;Oscillatoriales;unclassified;Trichodesmium;erythraeum;Trichodesmium erythraeum IMS101	ornithine carbamoyltransferase	KO:K00611	pfam00185
TCCM_0311.00000320	2621300	6325200	4727500	5469100	9851400	14304000	3839500	1352100	2036600	2265800	3590000	5966100	3915700	4928800	2968900	3147300	1360600	5896400	2683900	1325800	1199100	4215700	9131700	7064800	3054400	4291100	2188100	3099900	5042300	637350	1014300	3180400	2298400	1503000	478990	2370100	1264300	Bacteria;Cyanobacteria;unclassified;Oscillatoriales;unclassified;Trichodesmium;erythraeum;Trichodesmium erythraeum IMS101
TCCM_0267.00000040	2505900	2115600	2331200	2040700	3010400	5387100	1522800	0	1969100	3141500	3148100	2033600	2198500	3421800	2918400	2753100	1719900	4472400	1756000	618790	369720	2687300	4267900	1980400	1900800	3495200	2230300	1817500	2671700	299850	262040	2751200	1602400	2128100	264650	614540	1013900	Bacteria;Cyanobacteria;unclassified;Oscillatoriales;unclassified;Trichodesmium;erythraeum;Trichodesmium erythraeum IMS101	UDP-N-acetylmuramoylalanine--D-glutamate ligase	KO:K01925	pfam08245
TCCM_0234.00000130	1005400	476340	1484600	1223400	3306000	4495700	701350	237850	1161100	1170300	419290	2098600	1624900	852630	1125700	608560	437710	1599300	386390	183530	265090	986750	1645500	499590	690010	1052500	639720	1357300	1067400	414820	501910	1171400	658290	1403900	0	469640	365920	Bacteria;Cyanobacteria;unclassified;Oscillatoriales;unclassified;Trichodesmium;erythraeum;Trichodesmium erythraeum IMS101	leucyl-tRNA synthetase, eubacterial and mitochondrial family	KO:K01869	pfam13603
TCCM_0249.00000020	3985900	7289700	3877500	8633700	3066400	7296700	1263300	643850	3012200	3337800	859310	1040200	2222300	4276500	4373300	1624500	1688600	2924600	1832900	271420	782700	4018400	7241400	2874300	733880	4318900	2800300	2060800	3152200	385590	376530	4153900	1321800	571240	535210	2443100	972810	Bacteria;Cyanobacteria;unclassified;Oscillatoriales;unclassified;Trichodesmium;erythraeum;Trichodesmium erythraeum IMS101	porphobilinogen deaminase	KO:K01749	pfam01379
TCCM_0282.00000030	8612000	9539200	18656000	20527000	15602000	22858000	4267900	4846900	10590000	9191200	639290	418130	7685600	8322300	6872900	6877000	4905900	11854000	6952800	0	0	7723700	13334000	1037500	0	8203600	5979800	138170	0	2267400	2175600	7346900	512780	495660	1618900	5869900	3537500	Bacteria;Cyanobacteria;unclassified;Oscillatoriales;unclassified;Trichodesmium;erythraeum;Trichodesmium erythraeum IMS101	Growth inhibitor	KO:K07171	pfam02452
TCCM_0082.00000290	0	660980	3244300	6394100	3970600	5224900	1399800	412080	1809400	1419500	2186100	4208700	2896500	4137700	2617700	1018200	2348600	3124200	634630	473030	677070	1714200	4055600	8175600	2732600	2655600	2238200	3653100	4888900	0	0	799980	2002700	615670	475500	2451200	453110	Bacteria;Cyanobacteria;unclassified;Chroococcales;unclassified;Synechocystis;sp.;Synechocystis sp. PCC 6803	Fructose-2,6-bisphosphatase		pfam00300
TCCM_0219.00000020	769010	0	0	38208	641870	2734000	0	0	0	0	4211100	3211100	2763200	2714700	168830	900330	563640	1323600	318860	441540	524140	1969500	4307200	3933000	2622300	2346200	1273100	2744300	2878800	145530	8525.5	1249500	1665400	1852300	0	0	0	Bacteria;Cyanobacteria;unclassified;Oscillatoriales;unclassified;Trichodesmium;erythraeum;Trichodesmium erythraeum IMS101	Translation initiation factor IF-2, N-terminal region.	KO:K02519	pfam04760
TCCM_0700.00000070	1035200	3888900	2328900	3022400	3194000	6652500	571060	298120	695830	652440	3135100	2591400	1791500	2251700	1717200	608930	431350	2116300	1091400	644070	613370	2771800	3483500	2431700	1725400	1803300	2007300	2094500	1910100	305920	389390	1530300	1879700	1604300	691370	2295100	675210	Bacteria;Cyanobacteria;unclassified;Oscillatoriales;unclassified;Trichodesmium;erythraeum;Trichodesmium erythraeum IMS101	C-terminal peptidase (prc)	KO:K03797	pfam03572
TCCM_0343.00000010	2359500	1670100	1329800	2767600	3590900	5906100	913020	0	2075900	1525900	2943200	2142500	2043300	2129100	1145900	1619900	595140	3479500	1497100	612340	598330	1813900	2476800	1919200	1502300	1791900	1223600	1949600	2511500	179680	248350	1783800	1492700	1958500	388240	1030300	907320	Bacteria;Cyanobacteria;unclassified;Oscillatoriales;unclassified;Trichodesmium;erythraeum;Trichodesmium erythraeum IMS101	Leucyl-tRNA synthetase	KO:K01869	pfam08264
TCCM_0422.00000350	0	0	21166000	14127000	91486000	109950000	22304000	9607200	0	29523000	0	0	31513000	45510000	0	30080000	17061000	51759000	12493000	14947000	6970300	26728000	26053000	0	0	30591000	20782000	29883000	25266000	4231300	18239000	0	23943000	9826700	0	11594000	0	Bacteria;Cyanobacteria;unclassified;Oscillatoriales;unclassified;Trichodesmium;erythraeum;Trichodesmium erythraeum IMS101	GTPases - translation elongation factors	KO:K02358	pfam00009
TCCM_0529.00001370	0	0	53938	12978	2038000	4137800	463020	0	46310	0	11048000	14212000	1577600	2466600	0	3597700	2024100	8465200	2096100	1445100	2402600	7050200	11603000	17465000	6595200	3296400	6479800	11349000	21637000	0	23911	4874500	6342000	5759600	0	0	0	Bacteria;Cyanobacteria;unclassified;Oscillatoriales;unclassified;Trichodesmium;erythraeum;Trichodesmium erythraeum IMS101
TCCM_0070.00004440	0	241120	0	515520	1595400	2471400	187760	0	759230	368530	9391700	4281500	2267800	557470	51320	408200	509070	1492700	0	882750	1367300	0	0	1948500	2296100	39657	0	4826700	6252700	0	0	0	3771400	2447100	0	139240	0	Bacteria;Cyanobacteria;unclassified;Oscillatoriales;unclassified;Trichodesmium;erythraeum;Trichodesmium erythraeum IMS101	Carbon dioxide concentrating mechanism/carboxysome shell protein	KO:K08696	pfam00936
TCCM_0455.00000140	2336900	2128400	4140900	5354800	7053500	10996000	1839700	896440	2361300	2475900	5995500	6127900	3917800	3509600	2499800	2203800	1828100	3427400	1416900	753920	425810	3022000	6895100	0	3837600	3502300	1461700	3722600	3125500	1033400	386180	4256200	1498400	3821800	347890	0	3719600	Bacteria;Cyanobacteria;unclassified;Oscillatoriales;unclassified;Trichodesmium;erythraeum;Trichodesmium erythraeum IMS101
TCCM_0104.00003850	19098000	17594000	10657000	3712000	7483200	8512400	5732000	20062000	39245000	45056000	0	0	1826400	7110000	3923400	22965000	17987000	20295000	1352000	0	0	0	0	1190600	0	0	0	0	0	313110	0	2431700	1630700	0	0	0	0	Eukaryota;unclassified;unclassified;Choanoflagellida;Codonosigidae;Monosiga;brevicollis;Monosiga brevicollis MX1	Tubulin	KO:K07375	pfam00091
TCCM_0842.00000020	2592200	3913600	3105500	3644100	2453800	5916800	1508700	425780	1234500	736760	4482000	2958400	1484200	1415800	1696900	2280000	1549000	2955900	1653600	590600	1250400	2848500	5588900	4477000	2593700	2781500	2226000	1348100	2952000	0	224420	2679100	3086900	2742000	219260	0	1223400	Bacteria;Cyanobacteria;unclassified;Oscillatoriales;unclassified;Trichodesmium;erythraeum;Trichodesmium erythraeum IMS101	Response regulators consisting of a CheY-like receiver domain and a winged-helix DNA-binding domain		pfam00072
TCCM_0808.00000250	5467200	2324300	0	4449000	11194000	16981000	2301400	259000	4395100	2844400	6191400	4959800	8603500	10012000	1499300	5158800	2970900	1965800	0	2761700	2637200	1166800	1659000	16095000	2327000	1778700	1434500	10661000	9043700	338320	58900	1079600	2859000	2480200	485820	140520	0	Bacteria;Cyanobacteria;unclassified;Oscillatoriales;unclassified;Trichodesmium;erythraeum;Trichodesmium erythraeum IMS101	CpcD/allophycocyanin linker domain.		pfam01383
TCCM_0272.00005640	0	171540	341910	1346400	2036200	1626000	94696	0	683470	1755300	7407400	14357000	1743100	856050	0	5613900	6286100	10243000	5300500	303300	0	6586400	7753900	11456000	8732500	6423000	4307700	8929300	11278000	0	0	7301600	5609800	2848400	0	0	0	Bacteria;Proteobacteria;Alphaproteobacteria;Rhizobiales;Rhizobiaceae;Agrobacterium;vitis;Agrobacterium vitis S4
TCCM_0242.00000020	3775800	3373200	6112500	6553700	4962300	12186000	1591800	828620	1468500	1433400	6205000	6493500	1928600	2989600	3249400	2293900	1236600	3759200	1727000	1060600	1247800	1731600	2348500	7526800	4435200	1614600	2137600	4182100	6031200	647720	403520	3663800	3061400	3015600	401980	2136800	3427400	Bacteria;Cyanobacteria;unclassified;Oscillatoriales;unclassified;Trichodesmium;erythraeum;Trichodesmium erythraeum IMS101	NADH:ubiquinone oxidoreductase 27 kD subunit	KO:K05581	pfam00329
TCCM_0985.00000010	11047000	18876000	18475000	12648000	14898000	23661000	4443400	931390	5813300	4105900	3202000	1070600	11181000	7462200	7333300	3310900	2231700	10576000	0	695740	1013100	2958100	4321300	4927200	1382000	1675500	1145300	1911600	3380700	143430	0	2264500	2296100	690060	309280	2368200	1769800	Bacteria;Cyanobacteria;unclassified;Oscillatoriales;unclassified;Trichodesmium;erythraeum;Trichodesmium erythraeum IMS101	Dihydroorotase and related cyclic amidohydrolases	KO:K01465	pfam01979
TCCM_0009.00000070	0	797680	1352500	1252500	1996100	3402800	877310	0	192140	0	975560	1280800	1201400	1456000	444030	508820	0	275680	567950	0	228680	909330	3026800	495680	696880	745310	561980	890660	1983300	250420	191070	681830	436650	627430	0	445070	0	Bacteria;Cyanobacteria;unclassified;Oscillatoriales;unclassified;Trichodesmium;erythraeum;Trichodesmium erythraeum IMS101	Uncharacterized flavoproteins		pfam00753
TCCM_0801.00000010	0	4268600	4792700	2868100	3169300	5136200	1379000	0	0	0	9747500	8793600	2412700	549400	547160	4484700	4266900	7175300	5330600	2986500	3705900	11422000	12065000	10147000	8988000	8035700	6056600	10444000	10776000	0	1213800	7770500	4734200	4531300	154950	0	0	Bacteria;Cyanobacteria;unclassified;Nostocales;Nostocaceae;Anabaena;variabilis;Anabaena variabilis ATCC 29413
TCCM_0755.00000190	0	3497900	3342300	6811900	7263300	8568800	1392300	0	0	0	7892800	9425200	8300800	5786500	2010900	5652000	2153800	6543300	4155600	1594500	1623100	6787900	11156000	8196900	6070300	5087000	6841200	7800600	10621000	832250	820280	4873300	4240100	4322200	912000	2870500	0	Bacteria;Cyanobacteria;unclassified;Chroococcales;unclassified;Cyanothece;sp.;Cyanothece sp. PCC 7425	Polyketide synthase modules and related proteins	KO:K13614	pfam00109
TCCM_0588.00000020	5548300	6468300	5798400	7744100	8833300	12728000	2739300	2854800	9069700	4247600	6172600	7293700	3980600	4962900	3693300	4007500	3554900	6238200	1951400	1643100	2031600	3947200	6975000	5517600	4075400	4815300	2946000	6625400	5686500	3105000	2422500	2934900	3797200	2713400	0	0	3696100	Bacteria;Cyanobacteria;unclassified;Oscillatoriales;unclassified;Trichodesmium;erythraeum;Trichodesmium erythraeum IMS101	NAD-dependent aldehyde dehydrogenases	KO:K00128	pfam00171
TCCM_0001.00000560	1083100	880270	1254100	1037100	2898200	4603300	401620	0	0	0	6106900	5698000	1342200	1766800	1128800	3261200	2541900	6178300	605800	2023800	1603500	1819200	2268100	4955100	3046900	1760100	1853900	4598700	5492000	0	49623	1570700	2985300	3788900	0	342180	0	Bacteria;Cyanobacteria;unclassified;Oscillatoriales;unclassified;Trichodesmium;erythraeum;Trichodesmium erythraeum IMS101	Nucleoside-diphosphate-sugar epimerases	KO:K01784	pfam01370
TCCM_0065.00000050	1122200	0	0	0	2105900	4113400	412920	1050900	0	0	2873900	1945400	1046400	1682800	0	2352800	0	2854600	1664900	91862	656070	3958500	6306200	5638400	369760	4538400	2975700	1351800	1552100	11685	72527	3561800	2571400	1420300	0	319190	0	Bacteria;Cyanobacteria;unclassified;Oscillatoriales;unclassified;Trichodesmium;erythraeum;Trichodesmium erythraeum IMS101	RNA-binding proteins (RRM domain)		pfam00076
TCCM_0216.00000040	1319100	2235900	3882800	2283000	1880800	5554900	438280	0	0	0	2480700	2807300	859480	640350	596800	66624	58292	932260	485470	447550	160560	427820	1014500	1772200	1178600	608480	335920	974270	546420	0	0	432120	206620	1009800	0	0	0	Bacteria;Cyanobacteria;unclassified;Chroococcales;unclassified;Crocosphaera;watsonii;Crocosphaera watsonii WH 8501	Lipase (class 3).		pfam12695
TCCM_0201.00000610	0	0	0	0	114950	0	0	0	490660	0	3530200	3019900	0	0	0	1110300	920200	4321100	1844100	197830	335110	1815000	2469000	2770900	1194000	876650	994750	2521400	1779200	0	61346	3107500	2940600	3365400	0	0	0	Bacteria;Cyanobacteria;unclassified;Chroococcales;unclassified;Cyanothece;sp.;Cyanothece sp. PCC 8801	Choline dehydrogenase and related flavoproteins	KO:K08261	pfam05199
TCCM_0213.00000060	2190600	3963500	5462800	4723800	6309600	6303300	2796200	706170	3711200	2105400	6173100	2700700	2448600	3389700	3581700	2407600	1695100	4631800	1013300	796360	1549400	1689500	2878300	4724800	3020600	1942600	2036800	4768800	4778600	110340	119140	1477600	3252800	2571300	446670	2023400	2559500	Bacteria;Cyanobacteria;unclassified;Oscillatoriales;unclassified;Trichodesmium;erythraeum;Trichodesmium erythraeum IMS101	3''(2''),5''-bisphosphate nucleotidase, HAL2 family	KO:K01082	pfam00459
TCCM_0238.00000010	327220	5923200	6832100	5048100	6746500	6727300	1115200	0	0	0	4707400	5727300	5283300	5125300	1528600	4715800	2705100	4772300	7054400	915210	646150	10674000	17359000	4371100	3468400	10836000	8310700	16598000	5394000	1307200	0	8291300	1659700	3140100	1239800	3475300	0	Bacteria;Cyanobacteria;unclassified;Oscillatoriales;unclassified;Microcoleus;chthonoplastes;Microcoleus chthonoplastes PCC 7420	Polyketide synthase modules and related proteins		pfam00501
TCCM_0705.00000020	10912000	2707100	1688200	654290	16445000	21206000	7193100	1431600	3654400	5119700	11062000	11529000	11798000	12948000	2935400	3526500	2029400	10074000	2596500	1793900	2703400	6636800	10721000	15280000	7707200	7626800	5703300	12203000	12138000	865930	1055800	4823500	7353300	3271000	2030800	0	5485900	Bacteria;Cyanobacteria;unclassified;Oscillatoriales;unclassified;Trichodesmium;erythraeum;Trichodesmium erythraeum IMS101	ATPases with chaperone activity, ATP-binding subunit	KO:K03695	pfam00004
TCCM_0242.00000030	2584300	5206900	5110400	6727800	9525400	13207000	1474700	937480	1802700	2764200	9075000	9492700	3828300	3289000	1291700	3398100	2152000	6422600	3483500	917590	2176400	5109400	5434600	7414700	5504300	3583700	2940800	5178300	7983000	1560400	369090	5383500	4143400	4757200	933530	1771300	255310	Bacteria;Cyanobacteria;unclassified;Oscillatoriales;unclassified;Trichodesmium;erythraeum;Trichodesmium erythraeum IMS101	NADH-quinone oxidoreductase, B subunit	KO:K05582	pfam01058
TCCM_0016.00000240	127470	1728500	3414700	2395700	4398900	7446300	1258300	524380	744400	1397000	1399600	1393700	1409100	1643800	1624900	1819500	830420	2971000	401850	194440	191200	1562800	2090700	1916200	873430	1608300	326080	730590	1323500	187630	17954	1280800	821460	531970	1120900	1142000	579530	Bacteria;Cyanobacteria;unclassified;Oscillatoriales;unclassified;Trichodesmium;erythraeum;Trichodesmium erythraeum IMS101	Predicted unusual protein kinase		pfam03109
TCCM_0365.00000010	490670	0	0	0	897510	2373300	146320	0	0	1009400	3659000	4695500	4560500	1951600	0	1616700	538870	776270	612490	1387000	807070	3204600	4848100	2935400	2136200	2762500	2823600	4745100	3267800	794960	337440	3232600	785240	889100	0	0	974200	Bacteria;Cyanobacteria;unclassified;Oscillatoriales;unclassified;Trichodesmium;erythraeum;Trichodesmium erythraeum IMS101	Ycf66 protein N-terminus.		pfam07444
TCCM_0675.00000010	2756800	3505500	3643300	5030200	2773600	5401100	1205500	989960	630030	1239200	2598600	3620400	2527500	2918500	2140100	1626400	1499000	3501000	1329500	881470	500130	3042400	5541000	4081700	2272400	3580800	2351600	3586100	3546600	471900	265940	3210200	1851200	2009500	289200	808980	2316000	Bacteria;Cyanobacteria;unclassified;Oscillatoriales;unclassified;Trichodesmium;erythraeum;Trichodesmium erythraeum IMS101	Response regulator containing a CheY-like receiver domain and an HTH DNA-binding domain		pfam00072
TCCM_0447.00001740	0	0	715450	0	922310	9801300	721550	1904700	3764300	2135900	17442000	13991000	2668200	5992900	0	7508800	4544300	14676000	9383800	1200400	292580	8426700	12208000	16386000	11457000	8796100	6995500	6232700	13114000	169290	1342200	7769800	2463200	4790000	3193200	14637000	0	Bacteria;Cyanobacteria;unclassified;Oscillatoriales;unclassified;Trichodesmium;erythraeum;Trichodesmium erythraeum IMS101
TCCM_0229.00000160	884930	0	0	0	0	0	0	978470	1987800	1475500	16844000	11532000	3769300	4990800	0	5821800	3275900	3622600	509720	3734400	3958800	1341400	2645400	13996000	2941800	2859100	1065600	6750700	14481000	284740	692790	2574000	5801000	5336600	0	0	0	Bacteria;Proteobacteria;Alphaproteobacteria;unclassified;unclassified;Nisaea;sp.;Nisaea sp BAL199	acyl carrier protein		pfam00550
TCCM_0899.00000010	4121800	8572800	6622200	7885300	3619400	7026200	1727400	0	0	107110	3069300	2764300	2040200	2727600	3997300	3492100	1500800	4056000	3306000	1545400	1364900	6338800	5728600	7058800	4311700	3293000	4930800	5559600	4443700	512020	97302	5097800	4098900	3571900	524480	1729500	0	Bacteria;Cyanobacteria;unclassified;Chroococcales;unclassified;Cyanothece;sp.;Cyanothece sp. PCC 7425	3-oxoacyl-(acyl-carrier-protein) synthase	KO:K00646	pfam00109
TCCM_0016.00000030	543560	1588300	2387700	2753000	1144000	3004400	719340	313350	1429800	1407000	1775400	1929800	804200	622740	834830	1630400	728350	2180000	959150	419870	506900	2778900	4815500	2060100	1211900	2961400	1601300	1401700	1479000	67620	126980	2554400	1046300	1002600	258530	200080	767740	Bacteria;Cyanobacteria;unclassified;Oscillatoriales;unclassified;Trichodesmium;erythraeum;Trichodesmium erythraeum IMS101	Caspase domain.		pfam00656
TCCM_0029.00000060	922320	1061400	623370	1360900	4016800	4612400	1066000	133560	1868500	1060700	4018400	2878500	2285400	1683400	701650	1322700	1236800	2774900	609440	938050	889780	705320	2571600	3618300	1805700	937000	742080	1970300	2215600	245010	0	879230	2603600	1897800	317930	576280	1601200	Bacteria;Cyanobacteria;unclassified;Oscillatoriales;unclassified;Lyngbya;sp.;Lyngbya sp. CCY 8106	DNA polymerase sliding clamp subunit (PCNA homolog)	KO:K02338	pfam02767
TCCM_0809.00000080	932220	2374200	3595400	3085600	2686200	4817100	866780	0	354130	392600	2551900	2482700	1418300	575750	1246100	1145800	0	2126700	1094800	177950	61467	1385500	2521800	882570	850760	1477300	932830	1016400	2118000	506100	465400	1165700	0	976260	307430	643800	1027400	Bacteria;Cyanobacteria;unclassified;Oscillatoriales;unclassified;Trichodesmium;erythraeum;Trichodesmium erythraeum IMS101
TCCM_0706.00000070	2244500	0	2723200	0	3253300	3390600	935110	962140	217940	1022200	10762000	7075700	70480	688880	1680400	3057100	2479200	4920000	1401500	1243400	1296300	3523500	6314500	10891000	7428700	3179200	1804400	4796400	5414600	0	509370	4058100	3556900	4423300	0	403670	0	Bacteria;Cyanobacteria;unclassified;Oscillatoriales;unclassified;Trichodesmium;erythraeum;Trichodesmium erythraeum IMS101	Cyanophycinase and related exopeptidases		pfam03575
TCCM_0749.00000070	0	413590	1335600	1288600	1794000	1127900	121810	0	0	0	767380	2300100	1191500	820440	0	0	0	0	0	77003	38786	367610	91234	566900	709250	0	300530	2101500	2498600	0	26802	0	263560	92955	127520	0	0	Bacteria;Cyanobacteria;unclassified;Oscillatoriales;unclassified;Trichodesmium;erythraeum;Trichodesmium erythraeum IMS101	Type IIA topoisomerase (DNA gyrase/topo II, topoisomerase IV), B subunit	KO:K02470	pfam00204
TCCM_0320.00000260	2130400	3474100	5378300	5289600	6478600	11366000	1987500	77311	3848900	1512300	5128600	4404000	948560	1719600	5917400	2708600	2264100	4349400	1525200	841080	833700	1636100	6847400	4151600	2644800	2260700	2591400	2026300	3381600	426760	78893	3031300	1950600	2694400	1190900	2858200	1308700	Bacteria;Cyanobacteria;unclassified;Oscillatoriales;unclassified;Trichodesmium;erythraeum;Trichodesmium erythraeum IMS101	tRNA(1-methyladenosine) methyltransferase and related methyltransferases		pfam00891
TCCM_0181.00005280	7056100	0	0	0	3590000	6378400	5422800	31827000	78534000	85682000	3184500	0	2170900	12750000	575570	25907000	22423000	34145000	0	0	0	0	563580	0	0	0	0	0	0	0	0	75132	387550	2327600	0	0	0	Eukaryota;unclassified;unclassified;Choanoflagellida;Codonosigidae;Monosiga;brevicollis;Monosiga brevicollis MX1	Arginine kinase		pfam00217
2503636691	0	0	0	0	0	0	0	43785000	0	0	0	86603000	74715000	0	0	86438000	60893000	143030000	48391000	0	0	0	110180000	0	0	77980000	51837000	0	0	10802000	0	0	49365000	0	0	27260000	0
TCCM_0292.00000010	2477600	1295800	5148300	2917000	4026600	4544900	1140800	679460	1311000	1776100	1426600	845940	2867600	2708400	2198800	1116200	1058800	2529400	938100	299860	164900	1138100	3983700	2039600	1120400	1637500	1187400	1518300	1594000	1244600	1029400	1604000	318830	445410	791890	2578000	425670	Bacteria;Cyanobacteria;unclassified;Oscillatoriales;unclassified;Trichodesmium;erythraeum;Trichodesmium erythraeum IMS101	Superfamily II DNA and RNA helicases	KO:K05592	pfam00270
TCCM_0002.00000020	1312400	1304800	3365400	2306600	2334100	4584300	579520	610680	693020	547130	1292300	763650	1047600	1020700	1147400	937010	879970	1187200	1188000	240810	357410	2633800	3658900	1023000	632600	2026200	1029300	485210	1345600	193670	240780	2232900	426990	526050	282030	1221400	70609	Bacteria;Cyanobacteria;unclassified;Oscillatoriales;unclassified;Trichodesmium;erythraeum;Trichodesmium erythraeum IMS101	Predicted hydrolases or acyltransferases (alpha/beta hydrolase superfamily)	KO:K01259	pfam12697
TCCM_0190.00000030	676240	1521400	18662000	8190000	21784000	27955000	4527800	1636800	4316700	4498800	5517600	5689900	10898000	14509000	5349900	3551500	1011300	2589800	4823100	1173500	693830	7938600	19866000	12216000	4907000	12897000	8206500	4607600	13354000	1057600	0	3139400	528940	1103600	3718500	5346500	809720	Bacteria;Cyanobacteria;unclassified;Oscillatoriales;unclassified;Trichodesmium;erythraeum;Trichodesmium erythraeum IMS101	chlorophyll a/b binding light-harvesting protein	KO:K02705	pfam00421
TCCM_0027.00000050	662610	194320	0	0	1595200	2829900	335980	352150	954170	850100	402240	374060	623970	589820	129640	514450	655970	1693500	1489300	88510	138170	1918800	3010600	172300	129770	1958900	1720900	415670	457850	81526	158690	2109600	88555	239390	0	0	641320	Bacteria;Cyanobacteria;unclassified;Oscillatoriales;unclassified;Trichodesmium;erythraeum;Trichodesmium erythraeum IMS101	light-independent protochlorophyllide reductase, iron-sulfur ATP-binding protein	KO:K04037	pfam00142
TCCM_0273.00003100	0	0	3035700	2768800	16160000	24676000	4747100	0	0	1186900	566300	0	23153000	27733000	0	3138700	2028000	5777000	0	3809200	5390600	0	2874400	807230	0	3926200	2037300	610370	654880	629590	23719000	0	0	0	0	0	0	Bacteria;Cyanobacteria;unclassified;Oscillatoriales;unclassified;Trichodesmium;erythraeum;Trichodesmium erythraeum IMS101
TCCM_0160.00000220	1033600	1712100	1913400	1391300	2052800	4609600	753480	442970	2441800	2242200	2985400	3220300	879880	1167800	481590	1936600	1532700	2456900	973850	386680	526460	1667800	3477700	2532500	1927000	2265300	1060000	1988200	2256700	379950	265250	1204900	1788100	1846600	293910	1078400	1956100	Bacteria;Cyanobacteria;unclassified;Oscillatoriales;unclassified;Trichodesmium;erythraeum;Trichodesmium erythraeum IMS101	S-methyl-5-thioribose-1-phosphate isomerase	KO:K08963	pfam01008
TCCM_0059.00000040	0	117300	1526900	5339300	1566300	4044100	0	189430	0	0	1805600	1226900	1200200	1430400	1050300	727060	438480	566140	34679	317080	345510	240630	1938900	2169400	1559300	1231800	413890	2931100	1915200	0	224710	27310	785750	1050800	516880	1205800	0	Bacteria;Cyanobacteria;unclassified;Oscillatoriales;unclassified;Trichodesmium;erythraeum;Trichodesmium erythraeum IMS101	BioD-like N-terminal domain of phosphotransacetylase	KO:K06873	pfam07085
TCCM_0502.00000230	1137300	3184500	6911100	7238800	17183000	18048000	4749500	983780	3721200	656030	12705000	9537700	2494500	3081100	3230000	3632300	3384000	7131700	1167400	3388700	3252700	744170	1994900	10584000	5933500	976830	1128200	8327000	9296200	447540	0	929820	9179900	6123400	843190	1551800	0	Bacteria;Cyanobacteria;unclassified;Oscillatoriales;unclassified;Trichodesmium;erythraeum;Trichodesmium erythraeum IMS101	Conserved TM helix.		pfam05552
TCCM_0066.00002190	0	0	0	0	723920	12527000	1833700	0	0	0	7213600	12568000	0	0	0	4838400	0	3889900	1421900	5592500	8076900	1307400	3151000	28541000	10675000	3666800	0	6301600	22663000	0	0	1443400	8028200	14704000	0	0	0
TCCM_0366.00000070	1591900	4227600	8532000	9735300	1320500	8175700	845880	938870	1008700	2904500	796180	617400	1999100	4112900	3437500	4906000	1021600	2379600	4692000	974820	2570900	6362700	13507000	6890800	1757100	8907500	4331400	1988300	1738600	196850	240230	4334100	4686500	651300	0	2131500	1101600	Bacteria;Cyanobacteria;unclassified;Oscillatoriales;unclassified;Trichodesmium;erythraeum;Trichodesmium erythraeum IMS101
TCCM_0654.00000050	0	0	0	4410100	9678600	26180000	0	0	0	0	0	0	5473800	5497300	5542500	0	0	14427000	7926200	0	0	7647900	13949000	7478300	0	11282000	5374800	0	0	1746500	4229900	9628300	0	0	0	0	0	Bacteria;Cyanobacteria;unclassified;Oscillatoriales;unclassified;Trichodesmium;erythraeum;Trichodesmium erythraeum IMS101	Fructose-1,6-bisphosphatase	KO:K03841	pfam00316
TCCM_0814.00004420	0	0	0	0	0	0	0	0	9731200	0	17132000	15774000	0	0	0	18819000	15119000	34843000	9014600	3251700	4630000	3683000	13655000	9637100	9704700	5482900	5730900	7108500	0	0	9970900	19208000	11440000	13737000	0	0	0
TCCM_0099.00000030	2018300	1711500	0	807170	3437400	6915800	1217500	0	1258300	1787600	385460	901510	1892900	1618600	0	1652800	416170	3202200	291080	77965	33952	735600	2164600	1075900	558300	275130	522410	362000	608040	162790	150970	760640	106870	295900	0	130490	159920	Bacteria;Cyanobacteria;unclassified;Oscillatoriales;unclassified;Trichodesmium;erythraeum;Trichodesmium erythraeum IMS101	nitrogenase molybdenum-iron cofactor biosynthesis protein NifE/nitrogenase molybdenum-iron cofactor biosynthesis protein NifN	KO:K02587	pfam00148
TCCM_0176.00001310	40642	0	123520	375310	1040300	2121500	240510	1103000	2947300	2233100	4073900	2631600	238790	265230	0	833850	706620	1399200	1675200	29267	73729	2088300	4665900	3395300	2153400	2677900	404100	2349300	6773000	0	275880	2372400	1626300	1797800	0	0	0
TCCM_0057.00000060	6199500	4743500	4711700	8806100	6999900	10388000	2149100	2000000	2748400	3262200	679390	118970	2373700	2527200	4574700	6012900	5071900	5213600	2714300	0	40651	4432200	6203100	5108000	293060	3172200	3114800	109460	128300	365730	1378900	5217200	481880	643040	638130	2104100	1371600	Bacteria;Cyanobacteria;unclassified;Oscillatoriales;unclassified;Trichodesmium;erythraeum;Trichodesmium erythraeum IMS101	adenine phosphoribosyltransferase	KO:K00759	pfam00156
TCCM_0842.00000070	998540	0	1876300	2754300	4013600	5001400	637180	465470	1517200	718690	2617500	2819400	1486900	1624600	968830	1731100	807690	2763400	1369900	424690	548070	1338800	2459300	3184900	1570200	1230900	899010	1260200	1750400	405470	348890	1177800	1720400	1300500	725740	2032500	1042900	Bacteria;Cyanobacteria;unclassified;Oscillatoriales;unclassified;Trichodesmium;erythraeum;Trichodesmium erythraeum IMS101	Outer membrane protein		pfam02321
TCCM_0276.00000050	862300	3279200	4396900	3460100	3603600	5292600	1507600	1151700	2088200	1828600	1374600	864280	1295600	1669000	1369400	1910500	1841200	2911400	2046900	449150	300920	4296700	5926500	2371900	1221700	3609100	2179900	1383600	2720200	374300	233510	3044000	1736800	1625800	0	562930	1582400	Bacteria;Cyanobacteria;unclassified;Oscillatoriales;unclassified;Trichodesmium;erythraeum;Trichodesmium erythraeum IMS101	glyceraldehyde-3-phosphate dehydrogenase, type I	KO:K00134	pfam02800
TCCM_0043.00000480	0	0	1636600	0	17095000	26004000	0	3374100	13569000	14225000	0	0	0	0	11102000	0	0	0	27735000	0	0	0	0	0	0	197750	196950	0	0	0	887410	0	0	0	0	0	0	Bacteria;Proteobacteria;Gammaproteobacteria;Alteromonadales;unclassified;Pseudoalteromonas;sp.;Pseudoalteromonas sp. TW-7	translation elongation factor TU	KO:K02358	pfam00009
TCCM_0235.00000200	1139500	3417300	8562200	5748400	5220400	4986000	1301500	1406300	3037800	2238100	2031800	1937600	2182200	1086000	6636100	3568700	2025700	4711600	1167800	731500	520540	3427900	4496000	2959600	573870	2279600	2757700	1223300	1104800	486890	618540	4639600	1405200	155710	208500	1282500	3025900	Bacteria;Cyanobacteria;unclassified;Oscillatoriales;unclassified;Trichodesmium;erythraeum;Trichodesmium erythraeum IMS101	Adenylate kinase and related kinases	KO:K00939	pfam00406
TCCM_0838.00000170	3034000	1843800	4188800	2060700	8693000	14058000	2033800	882480	4115600	3190100	9652800	8935700	4441700	6076100	160050	5197600	2937800	6933600	2243800	1523800	1362100	4345200	8446100	7003700	4530700	3759400	2071500	8976900	8707700	1454000	1899600	2694000	2268100	5359000	1023800	2521400	0	Bacteria;Cyanobacteria;unclassified;Nostocales;Nostocaceae;Nostoc;punctiforme;Nostoc punctiforme PCC 73102	Polyketide synthase modules and related proteins		pfam02801
TCCM_0178.00000040	868380	917270	1845400	2486800	2364700	5652500	673500	59735	990850	1882400	1983800	1689800	1552700	1285300	456050	1798800	468080	4152000	546380	190860	13426	1766700	2901300	1397500	1553100	1526400	895760	1031400	2250700	425360	251230	1319500	633320	510150	290440	822150	544880	Bacteria;Cyanobacteria;unclassified;Oscillatoriales;unclassified;Trichodesmium;erythraeum;Trichodesmium erythraeum IMS101	spermidine/putrescine ABC transporter ATP-binding subunit	KO:K11072	pfam00005
TCCM_0044.00000180	1500200	870760	1897600	2361100	3140200	5937800	1124700	0	330540	1192200	1821800	1820000	2011400	2575200	1226700	272230	1069600	2937900	724520	468930	486260	1782000	2283000	1937500	1141800	1182100	799390	1437800	1803600	171080	0	1242800	961480	970480	213940	799320	1530900	Bacteria;Cyanobacteria;unclassified;Oscillatoriales;unclassified;Trichodesmium;erythraeum;Trichodesmium erythraeum IMS101
TCCM_0649.00000150	0	485190	650690	1907600	1552200	4541400	662700	0	406210	461180	4556600	4536200	1323800	1566000	530560	2139000	717260	3118700	900650	1075000	1109200	2444200	4212800	4288900	1749100	2420700	1652600	2625400	3118400	90529	498100	2114000	1802300	2069900	510790	628010	1737900	Bacteria;Cyanobacteria;unclassified;Oscillatoriales;unclassified;Trichodesmium;erythraeum;Trichodesmium erythraeum IMS101			pfam12784
TCCM_0221.00000300	3417000	1115000	3759500	4776000	5595400	8718100	2161600	1286900	2735300	3023800	4999500	4098800	3132600	2863700	2320200	2389000	1315600	4557500	1587400	666830	732510	3827600	4393300	4076200	2509200	3315800	1911200	3681300	3508600	558410	433420	2288500	2056800	1943300	465670	1788300	582870	Bacteria;Cyanobacteria;unclassified;Oscillatoriales;unclassified;Trichodesmium;erythraeum;Trichodesmium erythraeum IMS101	Malic enzyme	KO:K00027	pfam00390
TCCM_0521.00004910	847750	1649900	3413700	6944100	3546700	5822800	323660	6360700	9343700	10252000	748860	497900	329780	2886400	1398900	10913000	5143400	13184000	8262200	2735100	4375400	7088000	13797000	15270000	223160	6399200	3878900	2121200	2856000	0	0	10849000	6987900	456230	0	0	0
TCCM_0167.00003800	5888100	8760900	11018000	9769000	12651000	16487000	3060000	1852800	4817900	4471700	216090	348600	7376200	7146300	5006200	4194500	4534600	6380500	3608300	440800	331430	6071200	10223000	9782.3	150720	5644400	5759400	119710	139090	633350	851230	4722500	539800	419670	2648500	4304100	1591000	Bacteria;Cyanobacteria;unclassified;Oscillatoriales;unclassified;Trichodesmium;erythraeum;Trichodesmium erythraeum IMS101	Glucan phosphorylase	KO:K00688
TCCM_0179.00000040	1261600	701810	1275500	1766700	3519800	2996700	540110	464900	707790	0	3216300	2764800	1889000	2630800	1098300	646120	0	1875800	1202300	1021800	624900	2295600	3373700	2302900	1522800	2391400	1078600	2168900	2649600	180440	49045	3049100	1613000	2295200	104770	0	1149300	Bacteria;Cyanobacteria;unclassified;Oscillatoriales;unclassified;Trichodesmium;erythraeum;Trichodesmium erythraeum IMS101	Predicted dehydrogenases and related proteins		pfam01408
TCCM_0975.00000010	361810	716910	906860	306310	4165900	5482600	515920	22449	341950	108000	2055000	2656600	894910	1164600	702180	847010	270530	1005300	174250	235660	385870	904880	1760800	2156400	1429400	788920	478380	1360500	1694600	54432	183740	777630	890860	1033100	618020	532640	163020	Bacteria;Cyanobacteria;unclassified;Oscillatoriales;unclassified;Trichodesmium;erythraeum;Trichodesmium erythraeum IMS101	Chromosome segregation ATPases	KO:K02022	pfam13533
TCCM_0705.00000080	919980	0	0	0	3378500	4535400	722790	755250	1274800	1446600	8181200	7564700	2357700	1871700	0	2178400	2073600	4147700	1669400	980930	2779900	962220	2097600	7219100	4720100	5040500	1187100	6377500	10324000	0	1315000	3120600	5101100	4879300	0	0	0
TCCM_0465.00000110	0	326820	2707300	4856500	4907300	7001600	1316100	0	338250	375570	4515400	2858500	2427900	2320600	1257500	1859700	0	1731300	0	431740	471170	1488100	2230600	2740200	2337200	711960	338540	2827500	3015000	151460	645700	374340	266730	1311300	1634300	2834000	934910	Bacteria;Cyanobacteria;unclassified;Oscillatoriales;unclassified;Trichodesmium;erythraeum;Trichodesmium erythraeum IMS101	Uncharacterized protein conserved in bacteria		pfam05239
TCCM_0689.00000490	1589200	0	1365300	1253800	2201700	3705000	919270	349910	678970	781940	3185800	3634200	2228900	2216800	842930	1075700	850040	2388400	1069300	106120	223650	1342000	2468000	3263200	2456400	1948700	1208900	3223200	3961200	0	145290	1705100	1525900	2009100	76888	647430	1010200	Bacteria;Cyanobacteria;unclassified;Oscillatoriales;unclassified;Trichodesmium;erythraeum;Trichodesmium erythraeum IMS101
TCCM_0262.00000040	191630	319680	856990	1110800	1833900	1943000	286050	89831	970790	790620	955630	865090	1089000	799740	545380	391440	296430	964510	428300	204950	167810	389250	1435500	857280	469880	1076600	459410	972410	1212700	191970	0	882140	565080	607490	98667	571420	390440	Bacteria;Cyanobacteria;unclassified;Oscillatoriales;unclassified;Trichodesmium;erythraeum;Trichodesmium erythraeum IMS101			pfam11866
TCCM_0394.00000130	1173500	821080	1220900	1127900	1890500	2968300	681980	358030	1426200	462570	1276900	971770	1156200	1288800	764790	817680	846660	1592600	548160	205790	210410	893080	1254700	935060	694150	889380	380260	1119000	1027900	45524	143110	760960	474780	581260	266980	778970	324560	Bacteria;Cyanobacteria;unclassified;Oscillatoriales;unclassified;Trichodesmium;erythraeum;Trichodesmium erythraeum IMS101	2-isopropylmalate synthase, bacterial type	KO:K01649	pfam00682
TCCM_0656.00000030	1079500	2562700	2224100	2199000	4790200	5652000	1229900	0	2481600	762640	2085900	1575000	2582800	2009600	920610	1980500	1525700	2409900	2382600	1096500	924450	1100100	4342500	2472200	1326400	2640700	1507600	1866400	1750700	539330	0	0	975130	1240700	1581400	824450	974750	Bacteria;Cyanobacteria;unclassified;Oscillatoriales;unclassified;Trichodesmium;erythraeum;Trichodesmium erythraeum IMS101
TCCM_0656.00000010	1270100	1285800	2050300	3372700	3348900	6486000	704050	0	837320	0	3333800	3740800	2752200	4421600	1158800	448750	1210100	268450	738040	1459400	1394900	1033900	2537000	4199100	3325600	2201400	1337600	3564800	2844700	260330	0	0	720410	652460	1057600	493790	1372500	Bacteria;Cyanobacteria;unclassified;Oscillatoriales;unclassified;Trichodesmium;erythraeum;Trichodesmium erythraeum IMS101
TCCM_0709.00000570	11914000	12044000	12083000	14389000	26086000	27047000	3301400	2014200	8624100	8279200	6936500	0	10517000	11825000	9019900	4190100	3249000	9027200	6560000	2401300	3093300	11607000	16709000	5949400	100940	8395000	7815500	7963400	7124800	3329100	2530800	9007000	3489600	0	366020	5017000	1532400	Bacteria;Cyanobacteria;unclassified;Oscillatoriales;unclassified;Trichodesmium;erythraeum;Trichodesmium erythraeum IMS101	Translation elongation factors (GTPases)	KO:K02355	pfam00679
TCCM_0607.00000030	5779100	0	11682000	10056000	17669000	24781000	5601900	0	5732400	0	2002700	14515000	7362600	7014600	8822800	8206600	6002600	12495000	3623200	4348500	3645200	8068600	8113100	16718000	6956000	5560000	6807400	8919500	7714200	1582800	2651300	5320300	9609400	3631100	0	1021600	1830900	Bacteria;Cyanobacteria;unclassified;Oscillatoriales;unclassified;Trichodesmium;erythraeum;Trichodesmium erythraeum IMS101	ribosomal protein S16	KO:K02959	pfam00886
TCCM_0969.00000490	0	0	0	16460000	13228000	13358000	3937200	8238300	12551000	17655000	19035000	14673000	1577300	118930	2150000	16637000	11317000	29521000	7883000	3843000	3905800	5931400	6176900	11209000	7086100	2713700	4019900	7375600	6081000	0	9411500	19342000	20004000	17594000	0	0	0
TCCM_0372.00000040	0	0	10328000	0	8651500	0	0	0	0	0	574780	351630	0	0	0	0	0	0	0	376680	2292100	10181000	0	0	469520	0	8561900	177320	0	1431400	0	0	11352000	847040	0	11819000	0	Bacteria;Cyanobacteria;unclassified;Oscillatoriales;unclassified;Trichodesmium;erythraeum;Trichodesmium erythraeum IMS101	Hemolysin-type calcium-binding repeat (2 copies).		pfam00353
TCCM_0996.00000180	4049100	5674700	8741200	7138900	6349200	9675300	1802700	1170000	2571500	2971800	3496500	2747800	3167900	2712700	4746400	1767500	0	2789000	875670	743630	248950	2164200	3739300	2991300	1871200	1824400	2160200	1308500	1708100	0	112700	2520600	2347100	2810000	296090	1073800	0	Bacteria;Cyanobacteria;unclassified;Oscillatoriales;unclassified;Trichodesmium;erythraeum;Trichodesmium erythraeum IMS101
TCCM_0467.00000120	2250100	1744100	2163900	2384200	7580100	9306300	1440900	1176000	4146900	3459400	7018400	5107800	1488800	1231900	1362500	3559500	1846600	3888900	1252500	766160	850750	2451600	3425500	2815800	3992400	2038400	1626800	4325100	5960900	611600	453200	2154200	699350	1997500	554710	1718900	995100	Bacteria;Cyanobacteria;unclassified;Oscillatoriales;unclassified;Trichodesmium;erythraeum;Trichodesmium erythraeum IMS101	NAD/NADP transhydrogenase beta subunit	KO:K00325	pfam02233
TCCM_0871.00000030	0	2056200	2818600	3187900	6672100	4360200	1119500	0	1506700	1019800	920350	1605100	2186400	3021200	1826900	1526200	668840	0	0	610110	350290	4344200	10623000	0	510820	5803900	1869700	1412000	2668200	0	0	0	665420	851140	0	0	4886800	Bacteria;Cyanobacteria;unclassified;Oscillatoriales;unclassified;Trichodesmium;erythraeum;Trichodesmium erythraeum IMS101	protein RecA	KO:K03553	pfam00154
TCCM_0215.00000320	3904700	1052200	5942300	8161700	9385600	19900000	4119700	0	2290900	605530	1972100	2896700	1597900	762250	600280	1784100	2818400	1991600	4983800	419240	484720	5732600	7023900	2061200	1970600	4555800	4354300	2259000	2152200	0	0	6765300	1173700	1150900	813450	1429300	0	Bacteria;Cyanobacteria;unclassified;Chroococcales;unclassified;Microcystis;aeruginosa;Microcystis aeruginosa NIES-843	Non-ribosomal peptide synthetase modules and related proteins		pfam00501
TCCM_0871.00000020	7158200	0	0	0	9648700	13827000	3078900	0	0	0	9345100	5355600	6866800	8346200	4049800	3948300	3815900	4841700	3355500	1300800	2136000	6192500	11249000	5651800	4519600	7047100	3969800	5294000	7880300	2053900	1916300	6195500	3219500	5403000	0	0	9130900	Bacteria;Cyanobacteria;unclassified;Oscillatoriales;unclassified;Trichodesmium;erythraeum;Trichodesmium erythraeum IMS101	RecA/RadA recombinase	KO:K03553	pfam00154
TCCM_0832.00000110	301330	328490	2380300	1381000	726220	2381700	242650	34258	1227600	1059200	475990	1358200	3289200	3229100	189660	2947700	1514800	3976100	1191900	351270	376920	1965600	3061900	116920	256840	2144000	1452700	733240	1922000	121370	262450	1024700	0	356910	0	2607900	0	Bacteria;Cyanobacteria;unclassified;Nostocales;Nostocaceae;Nostoc;punctiforme;Nostoc punctiforme PCC 73102	Acyl carrier protein		pfam00550
TCCM_0394.00005020	0	0	0	975020	150640000	194310000	35330000	0	0	58414000	86337000	101430000	95969000	145460000	0	61896000	43364000	105380000	0	26764000	26664000	24750000	35078000	82225000	52049000	23571000	15439000	59593000	93629000	10666000	33898000	0	49982000	43183000	0	9709700	47381000	Bacteria;Cyanobacteria;unclassified;Oscillatoriales;unclassified;Trichodesmium;erythraeum;Trichodesmium erythraeum IMS101	Phycobilisome protein.	KO:K02284	pfam00502
TCCM_0009.00000040	0	1330700	1242800	3218700	2634100	2052600	610050	0	0	0	1322200	1023100	1628300	2368000	468960	0	0	0	0	363400	390750	1257200	1886000	1273100	1277600	803890	1386900	910890	1580000	29833	0	1269200	158770	423250	177570	1023900	738630	Bacteria;Cyanobacteria;unclassified;Oscillatoriales;unclassified;Trichodesmium;erythraeum;Trichodesmium erythraeum IMS101	Uncharacterized flavoproteins		pfam01613
TCCM_0774.00000320	679650	851490	3097600	4620500	5975100	12929000	1104500	0	809680	1145700	9168900	13692000	935660	0	1864100	4555700	6048300	8411500	8203700	1499300	1309500	14258000	23722000	5577000	6596000	10450000	7129200	9815000	9180800	0	0	9456700	8882000	5574000	622960	2462500	0	Bacteria;Cyanobacteria;unclassified;Chroococcales;unclassified;Cyanothece;sp.;Cyanothece sp. PCC 7822	Arylsulfatase A and related enzymes	KO:K01130	pfam00884
TCCM_0211.00000030	0	233180	243890	568610	2505500	959650	614500	307750	1030700	283880	2661800	979350	325090	159970	15120	1565400	1163200	2265400	954210	451830	472580	867260	2467000	7581800	982350	3502400	1741500	742180	5669600	0	123980	1442600	323630	996200	0	0	0	Bacteria;Proteobacteria;Deltaproteobacteria;Desulfuromonadales;Pelobacteraceae;Pelobacter;carbinolicus;Pelobacter carbinolicus DSM 2380	Thiamine pyrophosphate-requiring enzymes [acetolactate synthase, pyruvate dehydrogenase (cytochrome), glyoxylate carboligase, phosphonopyruvate decarboxylase]	KO:K01652	pfam02775
TCCM_0017.00000070	7490900	6985000	0	0	16923000	25662000	2956000	0	4985200	4416100	8316700	7242200	7441200	5063500	6433700	6539600	4847200	9344400	3970500	2128100	3161100	6116200	8613600	10025000	8114100	5428100	3440600	6311900	7390700	342840	518990	4574800	4480000	700340	2254300	5315500	0	Bacteria;Cyanobacteria;unclassified;Oscillatoriales;unclassified;Trichodesmium;erythraeum;Trichodesmium erythraeum IMS101	Ribosomal protein L13	KO:K02871	pfam00572
TCCM_0107.00000030	322930	956030	2308100	1532500	2479900	3968800	516920	316110	0	0	1132300	1342800	357960	508840	1224900	473620	573140	1201400	542550	165230	84740	1561700	2574400	914140	680280	1259700	467590	669820	936240	108130	0	922900	322900	491580	341070	785770	0	Bacteria;Cyanobacteria;unclassified;Oscillatoriales;unclassified;Trichodesmium;erythraeum;Trichodesmium erythraeum IMS101	amino acid adenylation domain		pfam00501
TCCM_0372.00000030	39389	2636000	2174300	4358300	2673500	5724600	871000	502740	275890	1198000	844100	540490	1936800	1970300	4599800	1258300	0	560380	1241500	176080	494410	2464700	3218700	2005000	389210	2059100	1877000	614330	1149200	137450	74664	1781700	425780	551050	738680	1023400	710040	Bacteria;Cyanobacteria;unclassified;Oscillatoriales;unclassified;Trichodesmium;erythraeum;Trichodesmium erythraeum IMS101	Glycosyltransferase		pfam12000
TCCM_0059.00000010	3962200	0	4484300	6143200	10645000	14536000	2074900	0	0	0	4726200	4368200	5650500	4065900	3258600	3466100	707010	4451100	2187100	1784600	1870700	3371600	7049100	2491900	4499900	4289100	3166300	5429100	5724100	101980	497180	3609300	6032500	2051700	1081200	5218000	2275400	Bacteria;Cyanobacteria;unclassified;Oscillatoriales;unclassified;Trichodesmium;erythraeum;Trichodesmium erythraeum IMS101	Uncharacterized protein conserved in bacteria	KO:K09767	pfam04461
TCCM_0120.00000480	0	0	0	0	0	0	0	0	0	0	8174700	15569000	0	0	0	3861700	2519000	24028000	3870300	905870	1260500	2103400	4481500	11565000	7083100	1065500	1212700	14687000	0	0	3715000	8018900	10925000	15995000	0	0	0
TCCM_0695.00000020	3853100	4853900	7647600	8331800	11227000	12256000	2669700	996160	2780400	4544300	2005000	6444600	3841200	4443400	3015600	3292800	2492200	6497800	555760	1647400	2633600	2236400	4856000	10928000	5959700	1670700	1884800	8867700	9381500	1247500	129970	1978100	5141300	806650	291930	3634900	0	Bacteria;Cyanobacteria;unclassified;Oscillatoriales;unclassified;Trichodesmium;erythraeum;Trichodesmium erythraeum IMS101	ABC-type proline/glycine betaine transport systems, periplasmic components	KO:K02002	pfam04069
TCCM_0743.00000050	3908700	2546100	3892100	4407700	3670900	4695400	1018500	0	1200900	0	1189500	128740	1057900	1898000	2256600	1324900	1029500	1295600	963610	474580	414190	1792800	2526600	2594800	596020	1619800	1407300	1399600	2160300	115230	175050	1440800	887900	882830	521840	2256200	627840	Bacteria;Cyanobacteria;unclassified;Oscillatoriales;unclassified;Trichodesmium;erythraeum;Trichodesmium erythraeum IMS101	tyrosyl-tRNA synthetase	KO:K01866	pfam00579
TCCM_0432.00000030	2535300	850790	4272300	3288000	4631900	8116800	1184600	432590	2241600	898490	5348200	2367500	2663000	3605700	2358000	785780	1804700	4717300	397020	1428500	872200	713160	1954900	3854000	1394100	1410600	955530	2999400	2861700	359150	0	395830	2123500	1767200	833180	1956200	986680	Bacteria;Cyanobacteria;unclassified;Oscillatoriales;unclassified;Trichodesmium;erythraeum;Trichodesmium erythraeum IMS101	Predicted pyridoxal phosphate-dependent enzyme apparently involved in regulation of cell wall biogenesis		pfam01041
TCCM_0209.00000010	60619	2932900	2865700	2547000	3053300	4414100	959830	0	1352200	0	1139900	1017300	1602300	2123700	1987800	1779900	1345700	3299000	883340	348850	543980	2302300	3806400	2028000	490290	2331000	2122100	829570	1228300	272130	293940	2430800	1058100	1013500	502610	1033800	567260	Bacteria;Cyanobacteria;unclassified;Oscillatoriales;unclassified;Trichodesmium;erythraeum;Trichodesmium erythraeum IMS101			pfam11209
TCCM_0647.00001080	0	0	0	0	0	0	0	0	0	0	9377900	20237000	0	0	0	4093000	17218000	6678700	3644300	0	269760	2811300	27441000	39834000	13270000	9710800	3620300	0	951110	0	0	0	2687200	342550	0	0	0		V8-like Glu-specific endopeptidase
TCCM_0109.00000010	1422300	2291800	8689700	1923600	4491700	11205000	2113600	1040600	5230900	3074200	4165200	3210100	2705100	2269000	1892400	3750900	3262900	6943800	4123200	528000	362730	4413200	5895600	3038100	1427500	5107200	3336800	3560300	4632900	223970	288510	5313100	2173400	2073100	1388600	3457600	2984300	Bacteria;Cyanobacteria;unclassified;Oscillatoriales;unclassified;Trichodesmium;erythraeum;Trichodesmium erythraeum IMS101	Nitroreductase		pfam00881
TCCM_0214.00000020	9322500	23483000	32954000	26518000	16736000	31340000	6453800	3731000	0	6431600	545320	778440	3114400	7630800	17841000	11557000	0	10588000	6111500	770630	427010	9512000	22900000	22119	513810	17256000	7328100	12689	0	919180	1668700	14547000	1185200	1243800	0	5137400	0	Bacteria;Cyanobacteria;unclassified;Oscillatoriales;unclassified;Trichodesmium;erythraeum;Trichodesmium erythraeum IMS101	Manganese-stabilising protein / photosystem II polypeptide.	KO:K02716	pfam01716
TCCM_0598.00000030	2650600	641850	1982000	4450800	3377700	6204600	1507100	855740	3168300	1401000	794260	1267300	1959100	2528000	2415500	1632100	2500800	3162300	1254700	405890	586080	1173800	1725600	851610	247430	1344300	952070	2161800	876020	309940	230810	1136400	710490	282930	1247100	2224200	1413400	Bacteria;Cyanobacteria;unclassified;Oscillatoriales;unclassified;Trichodesmium;erythraeum;Trichodesmium erythraeum IMS101	Conserved protein/domain typically associated with flavoprotein oxygenases, DIM6/NTAB family		pfam01613
TCCM_0857.00000080	6073200	2331800	12913000	5933500	8954500	15008000	3066100	3217600	5360900	4660300	7437600	3682300	4372400	4336300	2514800	4973800	4299000	8841200	4390100	1147600	1610800	5438500	10663000	6877300	3270500	7741200	4426600	3285900	6256900	1218200	1915800	5972300	5476700	3838400	2899800	6539700	3405500	Bacteria;Cyanobacteria;unclassified;Oscillatoriales;unclassified;Trichodesmium;erythraeum;Trichodesmium erythraeum IMS101	Acetyltransferases		pfam00583
TCCM_0862.00000020	0	810540	1618100	2775500	6269900	8508100	2030200	0	1082300	808810	249450	1408300	1815800	871720	356090	912390	417550	866290	1943000	385350	102900	2571800	4816000	1548600	451360	3374200	2590400	97214	0	0	0	1562700	461130	0	1704200	1781800	0	Bacteria;Cyanobacteria;unclassified;Oscillatoriales;unclassified;Trichodesmium;erythraeum;Trichodesmium erythraeum IMS101	L-lactate dehydrogenase (FMN-dependent) and related alpha-hydroxy acid dehydrogenases	KO:K00101	pfam01070
TCCM_0302.00000060	2352600	2761100	4359400	4822800	8037100	12604000	3023800	1875700	1827100	2348800	5271900	5234500	2983400	2026300	3234800	3717800	2755900	6058100	4443200	1084700	1312900	3550500	6660800	4740400	3844800	4734800	3602600	3770900	4866500	576350	0	4058100	2256100	2031700	756850	2108000	459660	Bacteria;Cyanobacteria;unclassified;Oscillatoriales;unclassified;Trichodesmium;erythraeum;Trichodesmium erythraeum IMS101	Membrane protease subunits, stomatin/prohibitin homologs		pfam01145
TCCM_0706.00000160	0	0	0	0	1590400	1357300	310440	0	0	638330	1863000	1408300	2304100	2633100	1189700	579550	521610	1106800	165560	370870	274590	363120	1731800	1347900	2500100	917670	249610	2622100	2164800	0	16381	907110	725750	908500	523610	1124200	0	Bacteria;Cyanobacteria;unclassified;Oscillatoriales;unclassified;Trichodesmium;erythraeum;Trichodesmium erythraeum IMS101			pfam12784
TCCM_0341.00000020	3482800	1418100	2532300	1933600	4061800	5563300	1268000	457670	2346900	874550	2517600	2735800	1656700	1023500	1014900	1756100	1407000	2950000	1165900	519900	357960	1852500	1976200	2184200	1061100	1569700	1113200	1762700	2437100	260650	254730	1115000	1006100	918590	281950	514120	1321000	Bacteria;Cyanobacteria;unclassified;Oscillatoriales;unclassified;Trichodesmium;erythraeum;Trichodesmium erythraeum IMS101	Thiamine biosynthesis protein ThiC	KO:K03147	pfam01964
TCCM_0945.00000030	1231000	1809400	3089000	974970	4473800	5778700	1304800	309730	1644300	0	2172300	1814400	1938800	1483200	544980	1418900	1146000	1733600	1648800	601010	336760	1967000	4764500	1317900	1117200	2154400	955250	1698400	1252400	208670	459480	1850200	1006800	613970	335900	957460	0	Bacteria;Cyanobacteria;unclassified;Chroococcales;unclassified;Crocosphaera;watsonii;Crocosphaera watsonii WH 8501	Non-ribosomal peptide synthetase modules and related proteins		pfam00501
TCCM_0855.00000110	1167100	1048500	1043400	1398600	807250	1096300	265070	0	1340200	1799600	2230000	1812500	493580	287760	0	359500	1169100	2575600	604610	572210	815610	732410	1226100	1532500	917240	902040	256550	976800	1334500	0	75963	986210	1767600	1039900	0	0	0	Bacteria;Proteobacteria;Gammaproteobacteria;Methylococcales;Crenotrichaceae;Crenothrix;polyspora;Crenothrix polyspora	Sulfotransferase domain.		pfam00685
TCCM_0579.00003130	0	0	0	0	0	0	0	0	0	0	4439300	5781300	0	0	0	0	0	3743900	1484400	253350	335410	3732600	3648400	5217300	2519300	1902200	2009200	2442900	2917700	0	0	3412900	4686700	4372400	0	0	0				pfam07862
TCCM_0915.00000050	3312200	3424000	6022000	6695800	11958000	16164000	3072400	368040	1290000	1236500	6974100	6299400	5696300	6586700	4340400	4955800	1097100	7951400	1575700	1505500	1546100	2494100	5511200	6273700	5282300	2709500	2216400	5419500	5032800	656860	1093100	2580500	3392900	2975400	2148400	2630200	2325000	Bacteria;Cyanobacteria;unclassified;Oscillatoriales;unclassified;Trichodesmium;erythraeum;Trichodesmium erythraeum IMS101	ATPases with chaperone activity, ATP-binding subunit	KO:K03696	pfam02861
TCCM_0348.00000350	3106200	1628400	1725200	2517300	4875500	6942700	1993700	313980	1577400	1422000	1389400	2085800	2469800	3601000	2536700	2116600	1375300	2945400	1411900	562910	561390	2892800	4561800	2451500	1726900	3089700	2125100	2257000	2917700	666390	1297700	3081300	1108500	1347200	617480	1901800	1131900	Bacteria;Cyanobacteria;unclassified;Oscillatoriales;unclassified;Trichodesmium;erythraeum;Trichodesmium erythraeum IMS101	Dinucleotide-utilizing enzymes involved in molybdopterin and thiamine biosynthesis family 2		pfam00899
TCCM_0139.00000440	2311300	4115000	3149400	8798400	2813900	5214300	1682800	19524	0	0	705060	1165700	4830300	2335400	5618200	989960	756110	920600	2049300	492240	643000	1592600	4340900	3833400	959040	2956900	1930200	2281500	805910	409210	0	2497900	974990	581820	257150	1324000	0	Bacteria;Cyanobacteria;unclassified;Oscillatoriales;unclassified;Trichodesmium;erythraeum;Trichodesmium erythraeum IMS101	adenylylsulfate kinase (apsK)	KO:K00860	pfam01583
TCCM_0045.00000070	4623500	0	0	448880	6154000	8806000	1318900	0	560720	0	4345700	3930400	2085200	1415900	3324600	864960	1824800	3245000	1169200	548860	508330	4433400	5327700	5593600	3110400	2477000	1932900	3452500	4704600	0	0	1485400	1871500	1892400	0	0	0	Bacteria;Cyanobacteria;unclassified;Oscillatoriales;unclassified;Trichodesmium;erythraeum;Trichodesmium erythraeum IMS101	Ribosomal protein S14	KO:K02954	pfam00253
TCCM_0519.00000020	3583600	2559000	1460200	3703700	3019800	5322300	923340	707290	778290	645270	3792800	4777000	1249600	1818100	1473600	1720300	1019400	2293400	1295400	286060	866510	3598500	3870100	3268200	2476800	2652100	1472900	2822300	2317900	252210	154810	2755200	2126000	2217200	206430	2127000	1623200	Bacteria;Cyanobacteria;unclassified;Oscillatoriales;unclassified;Trichodesmium;erythraeum;Trichodesmium erythraeum IMS101	Uncharacterized conserved protein	KO:K09117	pfam09424
TCCM_0435.00000040	499910	1326900	2139400	2149600	2901300	3503900	672680	0	1207300	1438000	3532400	2837600	862960	1497800	1655900	1489700	976070	1888100	889100	793150	835940	1445000	2085600	3053600	1731000	1405500	1179700	2078500	3139100	464580	197790	1256800	2023600	1682800	198490	1285800	1268300	Bacteria;Cyanobacteria;unclassified;Oscillatoriales;unclassified;Trichodesmium;erythraeum;Trichodesmium erythraeum IMS101	Putative Zn-dependent protease, contains TPR repeats		pfam13414
TCCM_0541.00000250	469590	0	1735800	2532100	2619700	6310800	1234600	518060	0	1136300	2183800	2517200	2651900	1901900	1417800	2551300	998810	3027900	1577900	583020	497780	2241800	2436700	778140	1155300	3126000	1711800	1610800	2105300	324900	0	3049300	1449400	1099000	0	1854400	1353800	Bacteria;Cyanobacteria;unclassified;Oscillatoriales;unclassified;Trichodesmium;erythraeum;Trichodesmium erythraeum IMS101	Predicted oxidoreductases (related to aryl-alcohol dehydrogenases)	KO:K05882	pfam00248
TCCM_0194.00000020	979280	0	2259900	2135000	4051600	7543100	1421100	0	300730	358710	2226000	3553100	1049900	1620100	1632200	598960	1253400	2954700	908700	746690	812110	1396700	1874400	2814800	1865300	1183900	1159000	2463400	2821000	32583	640510	1584800	2750700	1950400	0	2322200	444100	Bacteria;Cyanobacteria;unclassified;Chroococcales;unclassified;Cyanothece;sp.;Cyanothece sp. CCY 0110	Uncharacterized protein conserved in bacteria		pfam03372
TCCM_0191.00000010	623040	4425200	8161500	2557700	4391600	8022300	1295900	791320	691740	1863500	393940	124350	1600600	5261000	1311700	1987600	0	844290	2234600	833880	704440	1799100	2821000	3343400	535000	2833300	1833100	169510	2793600	264270	204970	2616700	1637500	1017200	358080	912260	180950	Bacteria;Cyanobacteria;unclassified;Oscillatoriales;unclassified;Trichodesmium;erythraeum;Trichodesmium erythraeum IMS101	proton-translocating NADH-quinone oxidoreductase, chain L	KO:K00341	pfam00361
TCCM_0712.00000280	5172600	7312900	8298600	16011000	9561300	14826000	1973800	621200	3982900	4522100	0	0	5672900	5529300	6160400	4189500	3289800	8769100	838620	0	581460	3830800	3906500	4464800	0	1593200	2379500	2599300	0	250270	605010	3900100	1105000	0	0	2691200	2271500	Bacteria;Cyanobacteria;unclassified;Oscillatoriales;unclassified;Trichodesmium;erythraeum;Trichodesmium erythraeum IMS101	Diadenosine tetraphosphate (Ap4A) hydrolase and other HIT family hydrolases	KO:K02503	pfam01230
TCCM_0151.00000050	1831600	742930	1298000	733980	2577300	5441800	611640	0	0	0	2860900	2749200	1090600	2103800	1978200	629740	822340	2467700	887750	651460	548160	1973200	2974400	2588700	1556000	1738300	1043200	1989800	1925300	405510	26063	1519800	1260200	1273600	579120	555580	1694300	Bacteria;Cyanobacteria;unclassified;Oscillatoriales;unclassified;Trichodesmium;erythraeum;Trichodesmium erythraeum IMS101	photosystem II S4 domain protein		pfam01479
TCCM_0039.00000030	2209800	3094000	3591100	4201900	3139000	6745300	1053300	236160	874380	1424200	1994000	1432200	1188000	1630200	2258700	2224700	1767100	3797400	1026300	79617	268720	1473200	2971800	3196400	1153600	1232800	1210000	1162900	1487600	283510	530120	2288500	1548300	939440	230410	1198000	1239400	Bacteria;Cyanobacteria;unclassified;Oscillatoriales;unclassified;Trichodesmium;erythraeum;Trichodesmium erythraeum IMS101	Serine/threonine protein phosphatase	KO:K01090	pfam13672
TCCM_0053.00000360	1868100	1616700	2526100	1949100	2039500	0	0	0	0	0	2552400	2061800	1254700	1504300	1443600	383760	0	2374200	96062	535090	474050	1121600	1684800	4098800	2050300	2357500	841250	1579000	1946700	87549	0	978320	876400	1389900	1868000	4109900	1015200	Bacteria;Cyanobacteria;unclassified;Oscillatoriales;unclassified;Trichodesmium;erythraeum;Trichodesmium erythraeum IMS101	cob(I)alamin adenosyltransferase	KO:K00798	pfam02572
TCCM_0070.00000010	6020700	11396000	11617000	9929100	6746800	9955200	2891100	1646700	3174800	2766200	3075900	2024500	3896500	3253400	8117900	3234800	484990	2766600	2784400	618930	900130	3850800	5115800	3477600	1581800	3288400	4069900	2992700	4154900	959870	253980	3350400	1251200	1065700	0	0	2945600		Phosphoserine aminotransferase	KO:K00831	pfam00266
TCCM_0120.00000380	0	115800	0	349890	2775000	4346700	1319000	0	2690800	0	4813400	3807400	3439500	1238600	938350	1143300	1036300	5891400	3053300	963220	908980	5120300	5112700	5291000	954730	3510300	3203000	13014000	3596000	0	0	2163600	413780	4170300	912670	3237500	63301	Bacteria;Cyanobacteria;unclassified;Nostocales;Nostocaceae;Nostoc;punctiforme;Nostoc punctiforme PCC 73102	Polyketide synthase modules and related proteins
TCCM_0349.00000030	1325500	2197300	5478600	2405600	3211900	4642900	1038400	303510	1548200	1566800	2034200	2409500	1407700	1405900	2779400	1257600	1164500	2155300	418960	295170	276610	1898700	3623000	1063200	390950	1621500	1441500	1433700	1241600	28910	121140	1246100	180620	370670	284680	851620	499430	Bacteria;Cyanobacteria;unclassified;Oscillatoriales;unclassified;Trichodesmium;erythraeum;Trichodesmium erythraeum IMS101	Aspartate/tyrosine/aromatic aminotransferase	KO:K00837	pfam00155
TCCM_0087.00000180	2271800	2505200	4474900	2242200	4060100	8887000	1893400	752610	1809200	645930	2900400	2699100	2010600	3462800	1791000	1738300	1646800	1873800	944360	774010	475430	2247900	3608900	2565600	2175700	2614600	0	2905700	2293100	508860	500900	1761200	1295900	762270	1315400	2368700	362990	Bacteria;Cyanobacteria;unclassified;Oscillatoriales;unclassified;Trichodesmium;erythraeum;Trichodesmium erythraeum IMS101	circadian clock protein KaiC	KO:K08482	pfam06745
TCCM_0205.00000030	1948500	3458800	4595400	3393700	4377400	5624800	1664100	0	0	0	4321900	3686600	2221700	2875800	3025600	1217000	610590	1123300	878960	548970	431460	2498300	2539400	3554300	2396900	1682700	1532600	2721200	2074000	815230	0	1905900	1027600	1070800	236780	549520	645300	Bacteria;Cyanobacteria;unclassified;Oscillatoriales;unclassified;Trichodesmium;erythraeum;Trichodesmium erythraeum IMS101	pilus retraction protein PilT	KO:K02669	pfam00437
TCCM_0763.00000080	4285200	16240000	11254000	17003000	17200000	22222000	3749700	2953700	4876300	5537100	12148000	11617000	2397200	4064000	3769400	5572000	4191400	9976200	3125200	1965900	2545100	4731400	11412000	10314000	6218900	5080000	3206100	7397400	8726700	936610	909820	4749500	4991500	3481900	1675300	4850500	2040300	Bacteria;Cyanobacteria;unclassified;Oscillatoriales;unclassified;Trichodesmium;erythraeum;Trichodesmium erythraeum IMS101			pfam11016
TCCM_0692.00000020	884400	2434500	3824300	3113300	3092900	4204100	883100	191900	1922600	574870	1219800	1927200	1817200	2696300	1817100	493610	200540	1047500	122590	126070	161890	1239600	636490	1793700	352990	1006600	225300	2183100	1162000	530920	293260	1062000	407050	716350	0	0	0	Bacteria;Cyanobacteria;unclassified;Oscillatoriales;unclassified;Trichodesmium;erythraeum;Trichodesmium erythraeum IMS101	acetolactate synthase, large subunit, biosynthetic type	KO:K01652	pfam02776
TCCM_0078.00000490	2033600	2136000	1354900	3530000	3489300	6827800	1249300	572670	2631600	2065800	2128800	2083300	3389400	2743800	2463000	2313800	1549600	3701900	2044600	500110	910680	2882500	5645900	3798600	1148900	3615500	2847200	1442700	2299200	788360	566760	3767100	1575400	1373100	506570	1222400	4175900	Bacteria;Cyanobacteria;unclassified;Oscillatoriales;unclassified;Trichodesmium;erythraeum;Trichodesmium erythraeum IMS101	Universal stress protein UspA and related nucleotide-binding proteins		pfam00582
TCCM_0772.00000400	7920800	8762300	24007000	17401000	4191300	4683600	1645900	0	0	0	5175000	2668700	3014100	3145100	10435000	845340	478840	1796100	2349000	820950	972430	6247000	11180000	7466500	2308100	7947500	3427900	3109900	1927500	758100	213250	6580800	2761600	1519900	871860	0	0	Bacteria;Cyanobacteria;unclassified;Chroococcales;unclassified;Cyanothece;sp.;Cyanothece sp. PCC 8801	Uridylate kinase		pfam00696
TCCM_0376.00000020	832440	1146600	3440800	3440900	2416800	3718500	1113200	1162800	0	0	3001600	3910100	690360	1565400	2362100	2225300	1234100	2986200	2648200	973560	1473500	4225500	6840500	3169000	3296400	5075700	2716400	3345400	2020600	574150	1528900	5199000	2979500	1679400	0	1187000	1956400	Bacteria;Cyanobacteria;unclassified;Oscillatoriales;unclassified;Trichodesmium;erythraeum;Trichodesmium erythraeum IMS101	Putative Zn-dependent protease, contains TPR repeats		pfam13414
TCCM_0731.00000180	3777200	3237600	5075700	5022800	6126600	9327900	1726600	805260	2113400	1302400	3257000	2856900	2825900	3535000	2323000	2717600	1477700	3754300	1417300	581270	954270	2130400	3681400	3106900	1702200	2252300	2237800	2647300	3235800	431920	1258800	1573000	1395000	1297700	789020	500960	1586100	Bacteria;Cyanobacteria;unclassified;Oscillatoriales;unclassified;Trichodesmium;erythraeum;Trichodesmium erythraeum IMS101	Patatin
TCCM_0525.00004950	1537800	5075900	4394800	3883800	8836400	10374000	1232900	0	1376100	1699200	0	1423200	2898200	1686900	3007500	3290500	1924400	5200600	631810	1093100	1470400	1291400	2153700	7621700	3583500	1024300	833820	3809800	4294400	298900	0	753570	4161000	0	0	0	0	Bacteria;Cyanobacteria;unclassified;Oscillatoriales;unclassified;Trichodesmium;erythraeum;Trichodesmium erythraeum IMS101	ribosomal protein S18	KO:K02963	pfam01084
TCCM_0964.00000020	1767000	4562800	4753200	4840700	4805200	9250700	1179800	1361100	2334500	2757500	3209300	2267900	3319100	1555500	2311600	2879200	958140	2642100	2297800	569380	378910	2973900	6131100	2242200	1897200	4275000	2657400	2451200	2445300	731830	273780	3160400	1327500	1577400	300760	997330	748870	Bacteria;Cyanobacteria;unclassified;Oscillatoriales;unclassified;Trichodesmium;erythraeum;Trichodesmium erythraeum IMS101	Threonyl-tRNA synthetase	KO:K01868	pfam03129
TCCM_0482.00000050	1875300	1178300	11541000	7420500	1420900	4878700	705190	0	0	946350	0	0	1228400	1194500	1432000	708530	786720	845360	1719400	0	0	2736400	4257800	0	0	3431100	1629600	0	0	93345	120290	2881500	12952	0	0	3306500	0	Bacteria;Cyanobacteria;unclassified;Oscillatoriales;unclassified;Trichodesmium;erythraeum;Trichodesmium erythraeum IMS101
TCCM_0373.00001580 (+1)	0	0	0	0	1271800	2222600	0	11757000	21617000	21080000	10050000	9467300	0	0	0	14544000	12953000	26825000	5329300	4838400	6051600	6266600	9285400	10760000	6297000	7711100	3292200	0	352190	0	29948000	13893000	14789000	10036000	0	0	0
TCCM_0409.00000030	4001100	4571900	2386800	2953100	8267000	11073000	1775200	1221900	1737300	2160100	5060300	4656800	2015400	2312800	1783700	3443800	2463600	3699400	1350700	932720	778220	2838200	5147700	3958900	2675400	2973400	2049400	2829600	3694700	136280	33223	2484800	2392900	2459600	259690	0	1341100	Bacteria;Cyanobacteria;unclassified;Oscillatoriales;unclassified;Trichodesmium;erythraeum;Trichodesmium erythraeum IMS101	Ribosomal protein S1	KO:K02945	pfam00575
TCCM_0089.00000220	64829	0	673560	685590	1158900	2607200	352190	48034	98049	79631	939820	1009400	1408900	1590200	210540	81848	0	685090	315390	334590	313670	1348800	1491400	753290	534970	761560	901750	932270	1261000	0	0	1147400	274810	933480	251000	873600	647580	Bacteria;Cyanobacteria;unclassified;Oscillatoriales;unclassified;Trichodesmium;erythraeum;Trichodesmium erythraeum IMS101	Signal transduction histidine kinase regulating C4-dicarboxylate transport system		pfam02518
TCCM_0312.00000170	0	4965200	3798400	5557900	3002400	6232600	1358700	0	2659300	498110	7081600	5704500	2301300	3370300	3751500	6550900	2787700	6961000	2555600	2154500	2455500	8596500	14070000	11115000	8346300	9966300	6340200	7972100	9230300	1044200	2065200	8130100	5600600	3536700	0	0	0	Bacteria;Cyanobacteria;unclassified;Oscillatoriales;unclassified;Trichodesmium;erythraeum;Trichodesmium erythraeum IMS101
TCCM_0212.00001020	0	0	0	0	0	0	0	0	0	0	10678000	10261000	0	0	0	0	0	0	16913000	3543000	5363500	12231000	17226000	13908000	5273400	14976000	9494500	8029000	13563000	0	4915000	18447000	20649000	7228500	0	0	0	Bacteria;Cyanobacteria;unclassified;Oscillatoriales;unclassified;Trichodesmium;erythraeum;Trichodesmium erythraeum IMS101	Hemolysin-type calcium-binding repeat (2 copies).		pfam00353
TCCM_0028.00000020	2311200	5330100	5759700	4669500	3436900	5206300	2383200	235660	266080	1212500	6411700	4434700	1653900	1176100	8617600	1720000	1196500	1480400	1702900	1346300	679960	3307200	2673800	5498000	2223400	3381900	956480	3293200	2982600	964910	115400	3024900	4262500	3814800	463320	2902900	1247800	Bacteria;Cyanobacteria;unclassified;Oscillatoriales;unclassified;Trichodesmium;erythraeum;Trichodesmium erythraeum IMS101	Peroxiredoxin	KO:K03564	pfam00578
TCCM_0126.00000040	0	0	437850	528020	2000300	3100000	286930	0	400730	371650	9714.2	0	0	0	209110	268130	215180	411950	688120	0	0	201450	495120	347800	0	386070	307500	0	50017	33303	0	935670	0	0	102220	331930	0	Bacteria;Cyanobacteria;unclassified;Oscillatoriales;unclassified;Trichodesmium;erythraeum;Trichodesmium erythraeum IMS101	ABC-type bacteriocin/lantibiotic exporters, contain an N-terminal double-glycine peptidase domain	KO:K06147	pfam00664
TCCM_0754.00000010	0	0	232550	802660	3405600	0	222470	0	946860	0	5263100	4078900	883700	0	0	2491100	3381900	4722800	1930500	386100	507770	4265800	5943000	3080200	3215700	2798700	2466700	5087000	4326500	97167	448260	4360000	1547600	1767700	0	0	0	Bacteria;Cyanobacteria;unclassified;Oscillatoriales;unclassified;Microcoleus;chthonoplastes;Microcoleus chthonoplastes PCC 7420	amino acid adenylation domain		pfam00501
TCCM_0755.00005250	0	0	0	0	7844600	12539000	2590500	2228200	6263300	5860700	19869000	19512000	2697900	4925400	1706000	8500400	7408700	18009000	2607800	4413000	4429000	4089800	6780500	19862000	11402000	3343700	2490900	10783000	10099000	1293500	7672600	3668800	6828100	6585700	0	1655600	0	Bacteria;Cyanobacteria;unclassified;Oscillatoriales;unclassified;Trichodesmium;erythraeum;Trichodesmium erythraeum IMS101	Phycobilisome protein.	KO:K02095	pfam00502
TCCM_0936.00000700	0	0	0	0	11102000	15716000	2853800	1263800	0	3714100	0	0	9077700	15853000	0	1810800	2848000	6160100	0	2765700	3517200	0	774390	1400900	0	1414700	531260	252490	415470	1209100	13667000	0	745090	0	0	0	0	Bacteria;Cyanobacteria;unclassified;Oscillatoriales;unclassified;Trichodesmium;erythraeum;Trichodesmium erythraeum IMS101	Flavodoxins	KO:K03839	pfam00258
TCCM_0594.00000030	0	950470	2607000	3106100	5328200	6455900	1330300	287750	273480	0	2915200	1658500	1661200	1942200	1570700	1330000	1507000	2263100	1826800	510800	650040	1475600	3531600	2317400	1907100	2026300	1353100	2800600	3792100	207560	0	1532700	1429400	1755800	797940	963260	459700	Bacteria;Cyanobacteria;unclassified;Oscillatoriales;unclassified;Trichodesmium;erythraeum;Trichodesmium erythraeum IMS101	alanine dehydrogenase	KO:K00259	pfam01262
TCCM_0429.00000170	770400	1313000	3643700	3317500	1988500	2965000	259410	0	665240	234980	1430900	2509800	848110	2579500	2053200	0	0	373840	502100	508270	732730	1054100	1098600	1867600	1709300	1629200	545930	1828300	2378300	224740	56235	1359900	716560	0	101160	488380	1601300	Bacteria;Cyanobacteria;unclassified;Oscillatoriales;unclassified;Trichodesmium;erythraeum;Trichodesmium erythraeum IMS101	Type II secretory pathway, pullulanase PulA and related glycosidases	KO:K02438	pfam02922
TCCM_0976.00000080	810460	219560	1306300	926300	2342700	1488300	1114600	0	189510	0	2977300	2364200	1759500	1639100	1596700	318430	978140	642610	257170	342170	460080	206370	572670	2540900	1763200	832560	359500	1409700	1903900	30771	616560	382720	2066100	2412200	390920	2185000	1930400	Bacteria;Cyanobacteria;unclassified;Oscillatoriales;unclassified;Trichodesmium;erythraeum;Trichodesmium erythraeum IMS101	dTDP-4-dehydrorhamnose 3,5-epimerase	KO:K01790	pfam00908
TCCM_0180.00000130	2499400	1188300	1564100	1559600	3288000	4457100	852630	0	1381200	859470	3430700	3368700	1854700	2301300	810630	1539700	1236000	2664300	387300	586190	665860	1265500	2177700	2683700	1829000	1082700	572210	2103700	2475500	154660	188580	1291400	1287600	1558700	173810	1167900	0	Bacteria;Cyanobacteria;unclassified;Oscillatoriales;unclassified;Trichodesmium;erythraeum;Trichodesmium erythraeum IMS101	Mg-chelatase subunit ChlD	KO:K07114	pfam13519
TCCM_0792.00005770	0	0	0	0	0	0	0	221630	0	0	0	0	0	0	0	183330	0	0	888450	0	0	0	0	0	0	0	0	0	0	0	0	2874300	0	0	0	0	0	Eukaryota;Chordata;Actinopterygii;Cypriniformes;Cyprinidae;Danio;rerio;Danio rerio Tuebingen	Actin and related proteins	KO:K05692	pfam00022
TCCM_0930.00000010	10725000	449920	1054700	1132000	15902000	21065000	7193100	1453800	3486000	0	9897100	10646000	11391000	12948000	2461700	3753500	2003700	9716200	2685200	1620300	2635800	6636800	10721000	15280000	7085900	7626800	5703300	11403000	11480000	850880	1055800	4823500	7049200	2883400	2165200	3824000	4847800	Bacteria;Cyanobacteria;unclassified;Oscillatoriales;unclassified;Trichodesmium;erythraeum;Trichodesmium erythraeum IMS101	ATPases with chaperone activity, ATP-binding subunit	KO:K03695	pfam07724
TCCM_0464.00000020	0	0	668550	1095200	4690300	7430300	1138700	1791700	2122100	3543900	8517600	6996800	2693700	2128100	446710	4477500	4279800	7179500	4064600	2148500	2432100	5162700	10954000	11087000	6598700	6819300	4451800	7958100	9601900	162140	1326800	5364100	3971800	4189700	0	205460	0	Bacteria;Proteobacteria;Gammaproteobacteria;Enterobacteriales;Enterobacteriaceae;Pectobacterium;wasabiae;Pectobacterium wasabiae WPP163	Ricin-type beta-trefoil lectin domain.		pfam14200
TCCM_0497.00000020	4206000	3978400	5521600	5954700	6716000	10734000	2144200	1074300	2951900	2895700	0	505540	2128000	2927000	2331600	3950800	3199400	7758000	3152100	0	687110	4517000	7470400	5738300	0	5080500	2584600	0	0	733920	1064000	4090100	3760600	0	968560	4661200	637510	Bacteria;Cyanobacteria;unclassified;Oscillatoriales;unclassified;Trichodesmium;erythraeum;Trichodesmium erythraeum IMS101			pfam12565
TCCM_0249.00000650	0	0	0	0	2451300	1955600	511830	0	0	0	1571400	0	1638800	8842400	0	1339500	1641000	2682400	0	11061000	12470000	0	5095100	946000	147240	1268900	4184000	2971000	4266700	0	0	0	3495000	1131300	0	0	0	Bacteria;Cyanobacteria;unclassified;Oscillatoriales;unclassified;Trichodesmium;erythraeum;Trichodesmium erythraeum IMS101
TCCM_0757.00001560	4493000	5576000	2817800	7672300	16815000	21398000	1526100	329050	0	689790	0	0	1965300	3445100	5352400	0	0	0	0	0	0	0	0	0	0	0	668750	0	0	140740	0	0	0	0	0	0	0	Bacteria;Proteobacteria;Gammaproteobacteria;Enterobacteriales;Enterobacteriaceae;Pectobacterium;wasabiae;Pectobacterium wasabiae WPP163	Penicillin V acylase and related amidases		pfam02275
TCCM_0328.00000030	0	1633500	2136900	1555700	1937100	4095400	617710	0	491570	526420	927290	2297600	1301400	1904800	1639000	612500	1240900	0	578730	204150	741990	543510	1983500	2408200	2046300	1114100	1174000	1964700	602520	372870	129410	778250	489050	45031	238870	1002100	748070	Bacteria;Cyanobacteria;unclassified;Oscillatoriales;unclassified;Trichodesmium;erythraeum;Trichodesmium erythraeum IMS101	Sugar kinases, ribokinase family	KO:K00847	pfam00294
TCCM_0087.00000040	738000	0	2334700	1385500	4315900	4313900	605650	273620	638130	701950	1807900	973470	3870000	3228100	1267000	817160	334770	0	1288500	644510	701240	1682600	1803100	1754500	669290	1605900	847840	2115100	2692400	610960	240270	1892200	1358000	727240	0	0	631630	Bacteria;Cyanobacteria;unclassified;Oscillatoriales;unclassified;Trichodesmium;erythraeum;Trichodesmium erythraeum IMS101	5''/3''-nucleotidase SurE	KO:K03787	pfam01975
TCCM_0916.00000060	0	0	0	0	13758000	40380000	6573100	0	0	0	14775000	12820000	19130000	13641000	0	0	8448700	27161000	2913500	4630100	5132300	3428500	9962200	0	9458900	6515200	8388800	17229000	18960000	0	1541400	4669700	12189000	9834500	0	7225300	0				pfam13529
TCCM_0281.00000260	625290	1276500	3294300	3194700	2398500	4442600	453850	0	0	0	1271000	2551700	1630900	1129500	1253800	0	0	2357700	0	243220	502390	1315000	3453500	4458800	1340800	1555900	1341800	1721400	1877900	45860	0	997830	1457200	534990	178290	310620	231780	Bacteria;Cyanobacteria;unclassified;Oscillatoriales;unclassified;Trichodesmium;erythraeum;Trichodesmium erythraeum IMS101	Selenocysteine lyase	KO:K11325	pfam00266
2503606787	0	0	0	0	1459700	2261700	0	0	0	0	1222500	705060	223250	652030	0	0	0	0	0	100430	0	0	0	1998700	626140	0	0	599850	794410	0	0	0	270880	250750	0	0	0
TCCM_0148.00000060	2151200	4639200	5660400	6267800	7353400	8475500	2098700	0	3137000	1566700	2984400	915030	2891700	5751900	2692100	1861500	1737500	5088900	1309700	818040	777230	2105000	2302300	3790500	2675500	3407500	1758700	4465800	4527700	586410	0	2167200	1505400	830450	384130	1554900	1592000	Bacteria;Cyanobacteria;unclassified;Oscillatoriales;unclassified;Trichodesmium;erythraeum;Trichodesmium erythraeum IMS101	global nitrogen regulator NtcA, cyanobacterial		pfam13545
TCCM_0345.00000070	2353900	7396500	8425700	8303400	9529900	15265000	3123200	859540	4590500	2509200	10290000	11278000	6691400	4359000	2516900	3246700	1965500	7535900	2324000	1842200	2183400	5667000	10423000	7033000	5326800	5150600	3955200	8170300	7266200	277460	821450	3270500	3784600	3145900	286750	1429000	479740	Bacteria;Cyanobacteria;unclassified;Oscillatoriales;unclassified;Trichodesmium;erythraeum;Trichodesmium erythraeum IMS101	Dehydrogenases with different specificities (related to short-chain alcohol dehydrogenases)	KO:K00059	pfam13561
TCCM_0346.00000030	163620	1320900	1142100	1000900	3304400	4136200	709960	242330	486050	445070	1488100	1846700	1429200	1468400	665670	341820	612460	600420	1443700	285930	445920	949800	1723000	1621900	838430	1084500	707590	1306100	1309100	203180	157050	1149700	939690	1007100	516610	980970	1072500	Bacteria;Cyanobacteria;unclassified;Oscillatoriales;unclassified;Trichodesmium;erythraeum;Trichodesmium erythraeum IMS101	signal peptide peptidase SppA, 67K type	KO:K04773	pfam01343
TCCM_0933.00000670	6353700	0	10720000	12025000	1244400	0	1529100	2165600	1094000	834580	289450	730090	0	0	4652000	6206800	1379900	4918700	10253000	612120	162370	15185000	28622000	5512500	460220	13558000	8366600	1252800	3811600	0	82882	14781000	3422300	263650	0	0	0	Bacteria;Proteobacteria;Gammaproteobacteria;unclassified;unclassified;Gamma proteobacterium;sp.;Gamma proteobacterium sp. NOR5-3	Arylsulfatase A and related enzymes		pfam00884
TCCM_0001.00000100	4188000	3172300	5414000	7400600	3779700	6484300	1511200	393560	563650	1516800	1490000	0	2528100	2555700	2348400	1406800	1367000	4714300	2839100	0	168170	3885700	5095500	0	454950	3830700	2432500	42153	586840	307370	428580	3351900	165370	483940	564100	2385600	2520700	Bacteria;Cyanobacteria;unclassified;Oscillatoriales;unclassified;Trichodesmium;erythraeum;Trichodesmium erythraeum IMS101	tryptophan synthase, alpha subunit	KO:K01695	pfam00290
TCCM_0074.00000280	996110	636240	3265500	3052000	4434700	6912600	369540	595740	2531000	2237900	1454100	1207000	2222700	2502100	282640	1625600	1644800	2365500	1712400	745180	698400	1970200	3676100	4005300	1802000	2266000	2348100	3714500	3537800	243700	26793	1765900	1464900	1996100	668330	1624900	2827400	Bacteria;Cyanobacteria;unclassified;Oscillatoriales;unclassified;Trichodesmium;erythraeum;Trichodesmium erythraeum IMS101	naphthoate synthase (dihydroxynaphthoic acid synthetase)	KO:K01661	pfam00378
TCCM_0274.00000030	205190	1906400	3695000	3876500	3336300	4525000	1021700	1117900	792590	1901500	408620	1705900	2811300	1063900	2930700	1864300	544120	2253000	1293800	112120	360400	1709900	3326400	638260	1198900	2766500	1275500	1244600	1234800	0	0	1614200	468180	977770	591160	1359600	1599500	Bacteria;Cyanobacteria;unclassified;Oscillatoriales;unclassified;Trichodesmium;erythraeum;Trichodesmium erythraeum IMS101	Alanine-alpha-ketoisovalerate (or valine-pyruvate) aminotransferase	KO:K00835	pfam00155
TCCM_0406.00000320	0	0	480420000	552930000	374100000	858400000	137170000	138550000	239110000	275530000	201770000	0	247970000	292850000	274200000	204880000	260140000	465430000	0	0	116850000	0	427620000	0	0	286200000	165320000	87844000	309260000	85655000	154120000	311070000	0	0	0	0	0	Bacteria;Cyanobacteria;unclassified;Oscillatoriales;unclassified;Trichodesmium;erythraeum;Trichodesmium erythraeum IMS101	Phycobilisome protein.	KO:K05376	pfam00502
TCCM_0821.00000220	4573200	4392400	7335100	7171500	2663500	7959100	1691500	893220	2611500	2507000	3051100	1899100	3657700	3251700	1473200	2564500	1183300	1535300	2859700	501990	438680	3683100	7358100	2078500	1375800	4313200	3459600	2143800	2267200	1063700	752550	4688700	1340300	1191800	0	0	786760	Bacteria;Cyanobacteria;unclassified;Oscillatoriales;unclassified;Trichodesmium;erythraeum;Trichodesmium erythraeum IMS101	glutamate N-acetyltransferase/amino-acid acetyltransferase	KO:K00620	pfam01960
TCCM_0238.00000150	0	726830	685390	1140300	1624100	1572100	409950	0	599740	0	2602100	3602200	502240	430290	607990	868470	657150	1543900	1520500	586150	1018300	1210000	3383600	4348000	2940400	2325900	1455300	2672200	1996800	0	202970	2799500	2539600	1720200	136080	644660	1852500
TCCM_0392.00000720	0	0	0	0	0	0	9152400	0	0	0	45620000	0	0	12576000	0	13138000	8221600	60087000	0	0	12111000	26081000	27457000	0	0	13073000	12360000	0	0	5011600	7793900	15643000	38515000	38447000	0	0	0	Bacteria;Cyanobacteria;unclassified;Oscillatoriales;unclassified;Trichodesmium;erythraeum;Trichodesmium erythraeum IMS101	Fructose/tagatose bisphosphate aldolase	KO:K01624	pfam01116
TCCM_0870.00000070	0	3079900	2979000	2553000	3396300	5072100	586930	237260	1695100	1477200	703340	376650	464280	475500	1502400	1201200	1291700	2366600	669810	282570	257930	1374100	2022800	139660	372100	1327400	687150	169510	848090	129940	53772	1497000	67525	330110	58413	1247400	0	Bacteria;Cyanobacteria;unclassified;Oscillatoriales;unclassified;Trichodesmium;erythraeum;Trichodesmium erythraeum IMS101	1-hydroxy-2-methyl-2-(E)-butenyl 4-diphosphate synthase	KO:K03526	pfam04551
TCCM_0320.00000330	1198600	2817900	3175800	2357900	5569500	7482000	1764200	587810	1354200	969050	3733700	2920100	4155200	1940100	1161900	872230	638900	1392400	1059900	643470	652620	1744500	4544800	3033700	2949700	2788300	1133400	2158500	2955600	889430	338370	1560000	1500000	1936600	0	1260800	160500	Bacteria;Cyanobacteria;unclassified;Oscillatoriales;unclassified;Trichodesmium;erythraeum;Trichodesmium erythraeum IMS101		KO:K01256
TCCM_0609.00000190	0	803520	454730	1053800	469930	2286400	144180	0	0	0	968740	979330	1307200	1609900	0	963830	435680	1624900	790280	345420	230920	2211500	2540000	752650	1357200	1512100	1467200	1808700	1948200	45755	517050	1823100	666700	731600	0	0	208730	Bacteria;Cyanobacteria;unclassified;Oscillatoriales;unclassified;Trichodesmium;erythraeum;Trichodesmium erythraeum IMS101
TCCM_0732.00000080	0	443960	1442200	2584000	1882200	2739900	736360	0	376580	376860	5526500	2962800	2265200	2195200	0	3774400	946560	3270200	1704900	1516700	1439000	6539800	6341000	2569000	4886300	2069200	6420200	5142800	3024400	0	160550	2426600	1614700	3163600	0	0	0	Bacteria;Cyanobacteria;unclassified;Nostocales;Nostocaceae;Nostoc;punctiforme;Nostoc punctiforme PCC 73102	Polyketide synthase modules and related proteins		pfam02801
TCCM_0142.00000020	1228800	430160	2573100	1541300	2671000	4392700	964730	0	0	982780	2514500	2410000	1181200	1834200	818080	576490	545280	1721900	1243000	1383700	1280800	1331200	1715500	3738700	904120	1240500	1001500	3223800	2975600	0	0	1324400	2596200	847600	294610	999020	141540	Bacteria;Cyanobacteria;unclassified;Oscillatoriales;unclassified;Trichodesmium;erythraeum;Trichodesmium erythraeum IMS101	uroporphyrinogen decarboxylase	KO:K01599	pfam01208
TCCM_0682.00000140	0	0	544160	0	4784400	12678000	168650	0	0	0	615170	1792200	1677500	1995700	0	0	0	0	209510	1267600	1026200	3377300	4201200	1288800	1505000	2443400	848870	2605400	5009800	0	0	0	1283600	1723300	0	0	0	Bacteria;Cyanobacteria;unclassified;Oscillatoriales;unclassified;Trichodesmium;erythraeum;Trichodesmium erythraeum IMS101	30S ribosomal protein S17	KO:K02961	pfam00366
TCCM_0739.00000020	965520	201160	0	0	2722900	4516800	580720	0	223710	286910	1270000	865050	1096800	1833100	156960	818950	121740	1942600	56018	153760	406650	340490	614600	1845400	405010	417450	526570	1018300	527990	139080	55887	61967	716200	1225600	194990	800830	666820	Bacteria;Cyanobacteria;unclassified;Oscillatoriales;unclassified;Trichodesmium;erythraeum;Trichodesmium erythraeum IMS101	Nucleoside-diphosphate-sugar epimerases		pfam13460
TCCM_0837.00000020	712960	1672900	3642400	4437700	5975400	5231100	842660	0	648920	0	4032700	3182600	1837300	1236100	1306100	1515200	770360	1739700	687900	724310	794560	1883300	1654100	2750100	2168300	1948900	638660	2078100	3216600	202760	102520	1346900	1835300	2743900	0	0	475020	Bacteria;Cyanobacteria;unclassified;Oscillatoriales;unclassified;Trichodesmium;erythraeum;Trichodesmium erythraeum IMS101	Subtilisin-like serine proteases	KO:K01362	pfam00082
TCCM_0273.00000030	650640	1004500	1381500	2043000	3501700	4320500	690270	518460	1541800	1491700	1519800	1857400	790130	1368400	911890	1258200	725800	1131000	376330	138970	101980	1227300	1514700	742700	846340	954290	677130	1110500	606020	567450	102160	914060	415920	507240	262660	675140	2650200	Bacteria;Cyanobacteria;unclassified;Oscillatoriales;unclassified;Trichodesmium;erythraeum;Trichodesmium erythraeum IMS101	Methylase involved in ubiquinone/menaquinone biosynthesis		pfam13847
TCCM_0063.00000230	283710	3315700	887410	534410	7466500	8652300	980320	222750	947960	365970	1796800	1737100	3238400	2688700	561920	1153600	496860	4855100	0	562430	1123000	0	755660	1250000	903070	1126700	533940	817970	2145500	575220	0	580280	930960	569830	778500	892020	405780	Bacteria;Cyanobacteria;unclassified;Oscillatoriales;unclassified;Trichodesmium;erythraeum;Trichodesmium erythraeum IMS101	Tellurite resistance protein		pfam06967
TCCM_0590.00000610	0	0	0	0	154300000	291020000	30523000	0	37911000	47424000	110570000	0	58144000	71464000	0	57038000	39147000	84472000	0	28918000	25553000	0	76118000	0	0	47550000	39639000	82764000	93651000	15367000	28254000	0	0	39443000	0	0	0	Bacteria;Cyanobacteria;unclassified;Oscillatoriales;unclassified;Trichodesmium;erythraeum;Trichodesmium erythraeum IMS101	F0F1-type ATP synthase, alpha subunit	KO:K02111	pfam02874
TCCM_0384.00000010	98807	396810	964860	415290	2404200	3466000	738490	462470	709580	1310000	1304000	1641700	772290	1390900	891780	2334400	1226500	3813100	1060600	404640	508770	2869000	4508000	2563900	946730	1757100	1813800	3083700	2782600	197970	806140	2232000	2578800	0	109020	706710	459820	Bacteria;Cyanobacteria;unclassified;Oscillatoriales;unclassified;Trichodesmium;erythraeum;Trichodesmium erythraeum IMS101	Phosphomannomutase	KO:K01835	pfam02878
TCCM_0086.00000290	947750	758440	1676200	1627700	4174200	4562400	379120	345020	926980	663530	1520800	818610	1168500	1349900	1505400	1124100	706280	2932400	413240	556560	367250	650210	2375800	1438700	742270	1369700	403410	1366300	1677400	288910	274740	955770	1094300	1008200	314150	554470	975740	Bacteria;Cyanobacteria;unclassified;Oscillatoriales;unclassified;Trichodesmium;erythraeum;Trichodesmium erythraeum IMS101	magnesium chelatase ATPase subunit I	KO:K03405	pfam01078
TCCM_0462.00000040	0	0	0	9431100	13155000	22801000	0	0	0	0	660420	2854700	5043600	0	4235000	0	0	7634800	4428900	2409800	1918100	9834600	17090000	10384000	3891000	10009000	6097600	0	4826100	1628700	0	8383900	4706500	1893300	0	0	0	Bacteria;Cyanobacteria;unclassified;Oscillatoriales;unclassified;Trichodesmium;erythraeum;Trichodesmium erythraeum IMS101	ribosomal protein S18	KO:K02963	pfam01084
TCCM_0193.00000290	0	0	526430	1354200	2552200	2600800	338510	0	0	740220	4471400	3890000	207040	0	699750	4018500	2762400	6412400	6685100	1099100	1037900	14210000	22463000	4272700	1385100	10666000	12634000	3250400	4973700	171310	0	7829800	1376100	2286300	0	0	0	Bacteria;Cyanobacteria;unclassified;Nostocales;Nostocaceae;Anabaena;variabilis;Anabaena variabilis ATCC 29413	Acyl-CoA synthetases (AMP-forming)/AMP-acid ligases II	KO:K13611	pfam00501
TCCM_0379.00000010	4098100	3347500	3252400	3335100	4872200	10118000	1750700	1112700	1296500	2233300	7514700	7220200	2670800	3470500	2512200	2847000	2134400	4651600	2336900	896330	1300100	3650900	6758000	7458700	4761000	3169800	2236800	4916400	3874300	744920	541720	3985700	3101700	4134900	0	1442900	4386800	Bacteria;Cyanobacteria;unclassified;Oscillatoriales;unclassified;Trichodesmium;erythraeum;Trichodesmium erythraeum IMS101			pfam11623
TCCM_0393.00000520	2776900	1903100	3007500	4803400	5433800	7236700	1350300	967950	2021800	1524100	4838100	3385200	2950200	2550600	1825900	2155500	621210	4320300	1587900	427940	973070	2203500	4971600	5932400	3537300	3058700	2014100	4124700	3636300	1754100	660460	2543400	2745400	1987500	0	1161300	844060	Bacteria;Cyanobacteria;unclassified;Oscillatoriales;unclassified;Trichodesmium;erythraeum;Trichodesmium erythraeum IMS101	Peptidyl-prolyl cis-trans isomerase (rotamase) - cyclophilin family	KO:K03768	pfam00160
TCCM_0590.00000060	1470100	4433100	5890100	5128400	5668500	9441600	2228200	0	842060	1213500	5171900	5935100	2689400	2456300	3503500	2920400	1344200	3944800	492450	1159900	1110200	625440	3550500	4855100	2377400	972570	1499200	4989700	4385400	85929	677790	1072200	2049400	1349000	372280	610460	0	Bacteria;Cyanobacteria;unclassified;Oscillatoriales;unclassified;Trichodesmium;erythraeum;Trichodesmium erythraeum IMS101	Enoyl-[acyl-carrier-protein] reductase (NADH)	KO:K00208	pfam13561
TCCM_0087.00000030	1381700	1837600	1152400	680940	3878000	4143300	658440	0	1566900	0	2341000	1496000	976710	1250100	902990	996110	816620	2147800	443470	385750	240800	455270	1314500	1478900	1092300	378460	138940	1599600	1467600	0	0	631660	486560	859310	168840	76787	0	Bacteria;Cyanobacteria;unclassified;Oscillatoriales;unclassified;Trichodesmium;erythraeum;Trichodesmium erythraeum IMS101			pfam13535
TCCM_0313.00000100	582830	967180	2125100	1618000	4798300	9328700	861740	672010	2529300	2873200	1614900	2907800	4010500	3512500	2120200	1927700	1578900	3204900	1557500	524500	121150	2159100	3869300	1764300	2586400	3053300	1186700	2743300	4139000	544820	73762	2445600	1052500	760140	512780	1935500	2019400	Bacteria;Cyanobacteria;unclassified;Oscillatoriales;unclassified;Trichodesmium;erythraeum;Trichodesmium erythraeum IMS101			pfam12784
TCCM_0777.00000030	2237600	2849100	2111200	2827500	3146800	4182500	880860	908620	1458600	1630400	1391500	1082600	1762700	1737100	2313900	1370900	1290500	2266300	1326100	367720	297120	2101100	3186600	3480600	899910	1712400	1278300	908740	1628300	303990	288320	1167300	1133000	710390	1094100	1865800	1061800	Bacteria;Cyanobacteria;unclassified;Oscillatoriales;unclassified;Trichodesmium;erythraeum;Trichodesmium erythraeum IMS101	transcription antitermination factor NusB	KO:K03625	pfam01029
TCCM_0883.00000020	0	1894400	3392700	430860	1269400	1493900	247560	0	204240	0	314870	697200	518710	328170	871040	413810	261200	1594200	89246	193490	112820	825770	692020	162430	396320	699400	109120	555470	845880	75848	0	235170	439150	717580	70703	592850	326720	Bacteria;Cyanobacteria;unclassified;Oscillatoriales;unclassified;Trichodesmium;erythraeum;Trichodesmium erythraeum IMS101	glucose-1-phosphate thymidylylransferase, long form	KO:K00973	pfam00483
TCCM_0054.00000040	0	952930	1913500	1494200	2005000	3450400	851700	0	0	0	469310	942000	980990	764060	467800	236270	143910	541200	119640	183720	33870	294970	998720	779940	835410	469640	315270	801770	1043200	37969	54074	559700	189580	186390	400880	889570	609240	Bacteria;Cyanobacteria;unclassified;Oscillatoriales;unclassified;Trichodesmium;erythraeum;Trichodesmium erythraeum IMS101	chaperone protein DnaK	KO:K04043	pfam00012
TCCM_0458.00000190	3953000	1569300	2177900	2462200	2319400	3541900	509590	0	0	0	3655500	2192400	1651900	1506300	2223000	451050	904020	1902300	1244200	851920	1103200	1923300	3398500	3184000	1829700	2521000	1366700	3156400	3712300	0	190540	1280500	1406400	1399400	0	3134900	0	Bacteria;Cyanobacteria;unclassified;Oscillatoriales;unclassified;Trichodesmium;erythraeum;Trichodesmium erythraeum IMS101	CHRD domain.		pfam07452
TCCM_0900.00000280	3458900	3634800	7183400	5564700	5619100	13326000	1869500	914440	3006800	2801800	2629800	4401000	2975700	3587100	4156400	3169100	1932100	4973600	3313800	1085500	1439000	5823500	8563400	3303900	2384200	5568500	4410400	2806500	5232400	721390	487010	6029000	2295900	1304800	641330	4220900	0	Bacteria;Cyanobacteria;unclassified;Oscillatoriales;unclassified;Trichodesmium;erythraeum;Trichodesmium erythraeum IMS101	Glucose-6-P dehydrogenase subunit		pfam10128
TCCM_0311.00000310	995840	0	0	0	7267600	10290000	1587100	1486400	823970	2475400	3661200	6667100	3268600	2594100	866980	2510800	347440	4790800	98480	992620	1534800	1865300	5278300	2188400	1814800	1902400	1292300	4384100	3819200	491600	501370	737020	3248200	2341600	151050	619700	344840	Bacteria;Cyanobacteria;unclassified;Oscillatoriales;unclassified;Trichodesmium;erythraeum;Trichodesmium erythraeum IMS101
TCCM_0589.00000110	0	111860	585630	140260	1236700	2481800	189120	386010	307340	567680	2455400	1212100	1104500	1198900	0	1132300	587270	1469500	1103000	142370	195410	1563900	2062800	1696100	734880	1406700	1181200	1297400	1124700	0	60247	1465800	1046200	950210	203640	0	0	Bacteria;Cyanobacteria;unclassified;Oscillatoriales;unclassified;Trichodesmium;erythraeum;Trichodesmium erythraeum IMS101		KO:K06894
TCCM_0638.00000070	0	0	6775600	5461800	7442000	9894400	1964800	0	4058400	4560100	1190700	1123700	3850200	4188700	4705800	2947000	0	5287500	1672700	761110	755010	1791600	3769400	3276300	1369700	2498200	2035100	1619100	2953400	0	0	2202200	678710	888730	854880	1474100	0	Bacteria;Cyanobacteria;unclassified;Oscillatoriales;unclassified;Trichodesmium;erythraeum;Trichodesmium erythraeum IMS101	Adenylosuccinate lyase	KO:K01756	pfam10397
TCCM_0137.00000020	0	1167800	1066800	768640	6566300	5005500	504310	0	0	0	3225100	7179900	2947200	491630	1344300	941530	971190	2138200	816260	838630	1375100	0	850230	3196800	3623000	1492200	0	3509200	1456300	512030	305960	791810	2901300	1159100	0	969350	2362200	Bacteria;Cyanobacteria;unclassified;Oscillatoriales;unclassified;Trichodesmium;erythraeum;Trichodesmium erythraeum IMS101
TCCM_0646.00000140	1139900	1674600	615240	1918500	3318300	5155800	1017900	0	0	407790	2331400	2264300	2016200	2245500	1377000	812520	1044000	2425200	1071500	646690	721110	2224000	2971500	2062700	1167500	1379300	1511500	1661600	1458800	276400	137600	1817700	990490	1675400	0	0	513060	Bacteria;Cyanobacteria;unclassified;Oscillatoriales;unclassified;Trichodesmium;erythraeum;Trichodesmium erythraeum IMS101	Glycosidases	KO:K01208	pfam00128
TCCM_0848.00000030	175500	732750	1851000	2088200	2910200	3357000	542400	0	0	0	2852500	2707200	771460	724100	727740	1532100	552440	631570	0	541960	546170	1066000	2100000	2237400	1681500	1504900	432390	1550000	1866500	209140	30391	970690	1407700	1461800	70002	642250	460140	Bacteria;Cyanobacteria;unclassified;Oscillatoriales;unclassified;Trichodesmium;erythraeum;Trichodesmium erythraeum IMS101	ABC-type dipeptide transport system, periplasmic component	KO:K02035	pfam00496
TCCM_0461.00005220	18865000	0	0	0	2813000	7037600	2370800	20736000	30436000	47589000	538370	0	51181	1793900	227560	19253000	12161000	36720000	0	0	0	0	0	0	0	0	0	0	0	0	0	0	654890	3200000	0	0	0	Eukaryota;Arthropoda;Insecta;Coleoptera;Tenebrionidae;Tribolium;castaneum;Tribolium castaneum Georgia GA2	Myosin tail.		pfam01576
TCCM_0410.00002260	0	14531000	6335600	8910900	8644500	11681000	1270700	2819400	4281700	6637600	3052700	0	1616800	4508600	270940	15616000	11683000	22094000	23060000	747580	0	27105000	30037000	0	1198600	14640000	13346000	0	0	1341900	6968300	32316000	2271300	3176700	1063800	1803300	0	Bacteria;Actinobacteria;Actinobacteria;Actinomycetales;Nocardiaceae;Rhodococcus;erythropolis;Rhodococcus erythropolis SK121	Arylsulfatase A and related enzymes	KO:K01133	pfam00884
TCCM_0061.00000030	2224000	2042200	8124400	6906400	6833500	13152000	2257600	0	0	915090	4396000	4417800	4720700	4256500	4042500	2665200	2741400	4944100	2490000	533540	1466600	2413400	6368100	5340100	2894800	2645000	1637400	2850300	4205700	317610	427100	4041100	3164800	2478100	795160	2344000	0	Bacteria;Cyanobacteria;unclassified;Oscillatoriales;unclassified;Trichodesmium;erythraeum;Trichodesmium erythraeum IMS101	NADH-quinone oxidoreductase cyanobacterial subunit N.	KO:K05585	pfam11909
TCCM_0759.00000100	0	583450	769760	1354500	952460	2468500	394540	279010	1014500	889420	1408000	2186400	570910	765990	329460	690010	568780	1637300	401660	75514	374090	100990	735840	784580	1242400	970170	363530	697530	776470	0	0	552360	651920	984680	0	396670	645730	Bacteria;Cyanobacteria;unclassified;Oscillatoriales;unclassified;Trichodesmium;erythraeum;Trichodesmium erythraeum IMS101	Ribonuclease D	KO:K03684	pfam01612
TCCM_0536.00000020	1626100	1777400	3642800	3680300	2724200	5726800	937060	713620	1737800	2146900	2413600	2652800	1107800	4262200	1747300	2000500	1057400	2434900	1154100	633780	891980	2310400	3090400	4194400	1793600	2085900	861080	2058900	2879300	418840	511300	1450400	2636400	995310	669700	1662400	586830	Bacteria;Cyanobacteria;unclassified;Oscillatoriales;unclassified;Trichodesmium;erythraeum;Trichodesmium erythraeum IMS101	Plastid and cyanobacterial ribosomal protein (PSRP-3 / Ycf65).		pfam04839
TCCM_0964.00000110	222900	809730	1350100	996820	3243200	6026600	969900	118460	0	0	2694500	2317400	895690	774260	973270	460160	815780	1339900	1076900	493150	577060	1135400	2261000	1846300	1717800	1641500	1019800	1622000	1893400	34403	174140	877190	1243100	909750	438240	670450	776770	Bacteria;Cyanobacteria;unclassified;Oscillatoriales;unclassified;Trichodesmium;erythraeum;Trichodesmium erythraeum IMS101	C-terminal peptidase (prc)	KO:K03797	pfam03572
TCCM_0378.00000490	2029900	4629700	7616500	7286400	5137000	7780200	2316300	1343200	5260300	3059400	39482	201350	3865100	3596700	5276600	2412100	1835900	5835200	2169200	672930	674990	8092000	8556400	3663400	103990	6725600	4929600	1908500	959870	829280	1293800	5398200	1777500	33620	854940	311310	3479700	Bacteria;Cyanobacteria;unclassified;Oscillatoriales;unclassified;Trichodesmium;erythraeum;Trichodesmium erythraeum IMS101	AICAR transformylase/IMP cyclohydrolase PurH (only IMP cyclohydrolase domain in Aful)	KO:K00602	pfam02142
TCCM_0736.00000010	5992300	6353700	11560000	18691000	1326400	3317500	731200	0	801440	1759500	0	0	2168100	2070500	6653200	593710	387480	1110300	1059100	0	0	0	3757000	0	0	580110	275070	0	0	1976100	363510	551850	0	0	812830	1567000	0	Bacteria;Cyanobacteria;unclassified;Oscillatoriales;unclassified;Trichodesmium;erythraeum;Trichodesmium erythraeum IMS101	3-dehydroquinate synthetase	KO:K01735	pfam01761
TCCM_0573.00000070	0	1751400	1892500	2399200	1925900	3975700	494350	0	873770	521140	1356700	570680	1230400	1408600	497580	242730	0	0	0	22940	16714	588270	1593600	1160900	676120	636470	112020	890530	476560	285900	50450	419600	365590	52307	451510	109080	491770	Bacteria;Cyanobacteria;unclassified;Oscillatoriales;unclassified;Trichodesmium;erythraeum;Trichodesmium erythraeum IMS101	glycyl-tRNA synthetase, tetrameric type, beta subunit	KO:K01879	pfam02092
TCCM_0839.00000020	3927500	4403900	5011800	4617600	5436100	8940800	1767300	431110	1918400	2507400	3876000	2912800	2075700	1736900	3772900	1916300	1497400	3842900	1673400	605970	880070	2481700	3855200	3455600	1883800	2162400	1246500	2203100	2277300	438030	208420	2449700	1961000	1659200	730290	1326600	1090500	Bacteria;Cyanobacteria;unclassified;Oscillatoriales;unclassified;Trichodesmium;erythraeum;Trichodesmium erythraeum IMS101	FOG: HEAT repeat	KO:K05386	pfam13646
TCCM_0995.00005240	15076000	15237000	12290000	5152100	4890100	7656600	5770800	17380000	22082000	28643000	0	0	1535600	4840000	3559400	15230000	8455700	7904100	5494200	0	0	682220	1476900	0	0	0	0	0	0	155860	0	5513100	0	0	0	0	0	Eukaryota;Arthropoda;Insecta;Hymenoptera;Apidae;Apis;mellifera;Apis mellifera DH4	Tubulin	KO:K07374
TCCM_0251.00000040	223700	604580	1367000	1649500	2177600	2764000	1034200	211560	772070	446900	2489000	2364400	1324500	1530700	100630	939330	269450	751030	124580	112600	152870	1515300	1616000	1267200	988060	1294100	1437500	1256000	1376000	0	0	1492000	600700	467880	223700	118850	778160	Bacteria;Cyanobacteria;unclassified;Oscillatoriales;unclassified;Trichodesmium;erythraeum;Trichodesmium erythraeum IMS101	FeS assembly protein SufB	KO:K09014	pfam01458
TCCM_0154.00000030	1174800	2171600	3910500	5362700	3651800	4791600	825560	448010	1123600	407480	3051000	2325200	1658600	2426600	2998000	831540	949080	1931100	621140	582540	674710	1057500	366640	2310400	1762500	247770	423130	2047600	2266100	218080	146070	1085200	1463900	1520800	224120	625490	551530	Bacteria;Cyanobacteria;unclassified;Oscillatoriales;unclassified;Trichodesmium;erythraeum;Trichodesmium erythraeum IMS101	transcription termination/antitermination factor NusG	KO:K02601	pfam02357
TCCM_0221.00000050	3137100	2420900	5812900	6552200	4892200	6712100	1011300	0	2232900	0	288170	0	3726900	4040400	1986800	2165300	805130	3541400	2002100	124220	145330	0	3776700	4942500	3158900	420490	0	23995	196860	1930400	509700	460070	632740	524600	1905800	5069900	0	Bacteria;Cyanobacteria;unclassified;Oscillatoriales;unclassified;Trichodesmium;erythraeum;Trichodesmium erythraeum IMS101			pfam14218
TCCM_0908.00000100	1682100	2246300	625650	1545500	1808000	3142500	569870	0	1051900	0	528160	1006900	622660	530520	2972500	954090	0	207860	496730	168020	350150	979650	2035900	345640	232550	1285400	703440	372580	1005600	630310	1051700	1164500	194070	378490	51785	1542500	0	Bacteria;Cyanobacteria;unclassified;Oscillatoriales;unclassified;Trichodesmium;erythraeum;Trichodesmium erythraeum IMS101	3-isopropylmalate dehydratase large subunit	KO:K01703	pfam00330
TCCM_0050.00000450	9186200	8977300	5353100	5920500	6184300	10219000	1774500	0	0	0	122670	201140	3340400	3660000	4216200	2218200	2720500	3822400	1992900	0	1278800	3716400	6780500	7781100	121500	4012500	2341900	0	0	986580	653080	4532200	2869200	82409	0	1769500	2417400	Bacteria;Cyanobacteria;unclassified;Oscillatoriales;unclassified;Trichodesmium;erythraeum;Trichodesmium erythraeum IMS101	Nitrogen fixation protein NifW.	KO:K02595	pfam03206
TCCM_0158.00001450	0	0	0	0	0	0	0	0	0	0	0	0	0	0	0	0	0	0	15244000	0	0	0	0	0	0	0	0	0	0	0	0	0	0	0	0	0	0	Bacteria;Cyanobacteria;unclassified;Oscillatoriales;unclassified;Trichodesmium;erythraeum;Trichodesmium erythraeum IMS101	plastocyanin	KO:K02638	pfam00127
TCCM_0362.00000020	0	833390	1566600	1013000	1669400	2841500	366880	0	828040	0	0	693620	311650	763930	519270	1058300	340960	2488900	1137600	235790	441750	2018000	2891900	881350	159720	1357000	1232400	304390	1544600	194260	208570	1921400	379460	95843	239150	602130	422350	Bacteria;Cyanobacteria;unclassified;Oscillatoriales;unclassified;Trichodesmium;erythraeum;Trichodesmium erythraeum IMS101	Succinyl-CoA synthetase, beta subunit	KO:K01903	pfam08442
TCCM_0083.00000010	0	707370	331000	1269500	1155000	3167400	91274	0	0	474460	1301200	812350	1333600	373550	1172300	226030	268010	0	920550	151850	162550	1218900	1804600	1432200	789620	1742600	1108100	1072200	604720	0	0	1123300	663080	710720	421550	1046100	1224900	Bacteria;Cyanobacteria;unclassified;Oscillatoriales;unclassified;Trichodesmium;erythraeum;Trichodesmium erythraeum IMS101	glucokinase, proteobacterial type	KO:K00845	pfam02685
TCCM_0688.00000040	1236200	0	786580	1969600	4743000	5760500	1458200	0	1802200	762170	3021500	2569200	3349400	4072300	3472500	1898100	410230	3081600	0	594210	1039200	911730	2749900	3656100	2294000	1627500	1761300	3177100	2455900	349940	0	1358300	1981700	2062200	119230	1026600	1624700	Bacteria;Cyanobacteria;unclassified;Oscillatoriales;unclassified;Trichodesmium;erythraeum;Trichodesmium erythraeum IMS101	Dihydropteroate synthase and related enzymes		pfam00809
TCCM_0152.00000030	513820	1573400	1659500	1147400	2333600	3915400	541640	259450	0	412300	0	1103200	1444600	1404300	403800	510910	0	1216200	550480	261070	366310	917860	2315900	145600	890010	1106500	823010	1020800	1333000	986170	73549	1277600	84003	645460	539250	246350	1267200	Bacteria;Cyanobacteria;unclassified;Oscillatoriales;unclassified;Trichodesmium;erythraeum;Trichodesmium erythraeum IMS101	arginyl-tRNA synthetase	KO:K01887	pfam00750
TCCM_0184.00000230	751590	1388500	2048100	2310200	1968200	1524000	517260	0	283900	0	116830	274510	940760	853760	756160	289870	0	0	744890	133560	0	1336900	2239300	213610	286810	2125200	774070	598370	441360	212650	171370	874230	46813	0	0	1176700	705020	Bacteria;Cyanobacteria;unclassified;Oscillatoriales;unclassified;Trichodesmium;erythraeum;Trichodesmium erythraeum IMS101	threonine synthase	KO:K01733	pfam00291
TCCM_0521.00000200	627510	1689800	0	3156600	3638800	1564100	0	0	166070	210290	653340	81072	2074000	1500900	1425600	799650	194340	583430	316610	504670	392280	366120	2004300	1375900	770070	1023800	464450	2023700	249990	108120	59825	709750	766370	1327200	274240	1000800	0	Bacteria;Cyanobacteria;unclassified;Oscillatoriales;unclassified;Trichodesmium;erythraeum;Trichodesmium erythraeum IMS101	Phosphosulfolactate phosphohydrolase and related enzymes	KO:K05979	pfam04029
TCCM_0685.00000240	5159600	2046100	6472500	5923300	3472300	4942000	1349800	0	1088500	0	705940	894900	1131900	1977900	2869900	1354900	614560	2308000	1273900	171410	106880	2136200	6165900	1546900	326910	5893400	2842300	1073500	1339700	136090	0	4048300	712210	496890	469100	1037600	1511000	Bacteria;Cyanobacteria;unclassified;Oscillatoriales;unclassified;Trichodesmium;erythraeum;Trichodesmium erythraeum IMS101	methionine-S-sulfoxide reductase	KO:K07304	pfam01625
TCCM_0379.00000070	4814400	3074800	5455800	6676400	4517900	5195800	1776500	92122	2197100	2148800	19829	15949	3327200	4588900	3015600	1686800	779260	2408400	1658300	140640	19102	1377200	3279900	0	0	1547900	1504800	7296.3	0	607630	112330	1580500	13403	65839	943170	2461700	614850	Bacteria;Cyanobacteria;unclassified;Oscillatoriales;unclassified;Trichodesmium;erythraeum;Trichodesmium erythraeum IMS101	anti-anti-sigma factor		pfam01740
TCCM_0315.00000080	0	1320500	1174300	1050900	2336600	5114400	708600	0	1183100	659930	1593200	1099200	1378800	1706100	203830	3318300	623960	2251000	477360	485290	437810	435580	1879300	4152700	834460	0	885840	2361000	1536800	61415	0	588760	917110	414850	1733600	2280400	3635300	Bacteria;Actinobacteria;Actinobacteria;Actinomycetales;Catenulisporaceae;Catenulispora;acidiphila;Catenulispora acidiphila ID139908, DSM 44928	Protein involved in biosynthesis of mitomycin antibiotics/polyketide fumonisin		pfam05721
TCCM_0525.00000180	4601400	3986700	3437600	4003700	1231400	4722300	2497700	1280700	2241200	2347700	639200	665020	2994400	2669200	1934800	3174300	0	645350	3177400	225140	40027	4390200	6758100	497980	517680	5299500	3017200	430180	531860	583270	127850	3941900	596570	444530	1329700	1859100	1516400	Bacteria;Cyanobacteria;unclassified;Nostocales;Nostocaceae;Nodularia;spumigena;Nodularia spumigena CCY9414	Anti-anti-sigma regulatory factor (antagonist of anti-sigma factor)		pfam01740
TCCM_0048.00004470	1198400	0	0	0	8837900	6870600	1228900	0	273850	345670	5658000	7437600	281210	521200	0	3060000	1616800	4685600	2892900	1812400	2957100	5304400	9406100	12848000	9141900	4937600	2794500	12725000	8627000	0	0	3813100	6536300	7788200	581830	0	0	Bacteria;Cyanobacteria;unclassified;Oscillatoriales;unclassified;Trichodesmium;erythraeum;Trichodesmium erythraeum IMS101	Tetratricopeptide repeat.		pfam13414
TCCM_0142.00002740	0	0	0	973930	7058700	20370000	5943200	569340	0	1141700	0	0	14856000	20845000	0	4911300	2624300	11486000	1193500	0	0	0	458250	0	0	1054200	992020	0	0	254070	4754600	0	0	0	0	0	0	Bacteria;Cyanobacteria;unclassified;Oscillatoriales;unclassified;Microcoleus;chthonoplastes;Microcoleus chthonoplastes PCC 7420			pfam14312
TCCM_0980.00000170	1735700	0	948140	691790	4753000	5320500	186660	0	0	0	2146600	1625900	1175000	79689	0	801760	243630	527290	213550	168220	871210	444570	2567200	1912900	1829900	1266700	1103000	2527400	2049800	0	0	852890	1174800	1375400	0	404090	0	Bacteria;Cyanobacteria;unclassified;Oscillatoriales;unclassified;Trichodesmium;erythraeum;Trichodesmium erythraeum IMS101	Glycine cleavage system protein P (pyridoxal-binding), C-terminal domain	KO:K00281	pfam02347
TCCM_0333.00000280	2329400	2387600	2242400	2896400	3403700	5374100	944550	686670	2926400	881670	0	0	2297600	3028800	0	1776900	843850	1902700	2447200	0	0	2915800	3844100	733170	0	3837600	2285600	33159	499680	179700	242910	3589700	452410	0	590030	1328500	724930	Bacteria;Cyanobacteria;unclassified;Oscillatoriales;unclassified;Trichodesmium;erythraeum;Trichodesmium erythraeum IMS101
TCCM_0261.00001320	7836300	0	0	0	4239600	16014000	3454300	12322000	9065500	6322700	2377200	0	1493000	1188200	0	5897700	2155700	9003900	0	0	0	0	466800	0	751820	0	0	0	0	0	0	0	667240	1833300	0	0	0	Eukaryota;Arthropoda;Insecta;Diptera;Culicidae;Anopheles;gambiae;Anopheles gambiae PEST	Myosin tail.	KO:K10352	pfam01576
TCCM_0951.00000010	0	372070	1121300	1170800	2717200	4485400	604410	0	729730	0	1078800	964840	1034000	1340600	830090	472190	335780	1453300	808210	103920	190520	1242700	1836900	915120	674000	1146700	804110	902940	663310	149390	22088	940740	209930	0	357710	1205500	884140	Bacteria;Cyanobacteria;unclassified;Oscillatoriales;unclassified;Trichodesmium;erythraeum;Trichodesmium erythraeum IMS101	squalene-hopene cyclase	KO:K06045	pfam13249
TCCM_0390.00001660	0	0	0	0	0	0	0	0	0	810350	3453600	1357200	0	0	0	2743300	531150	3917600	2653500	937450	1277500	3792000	2883100	1442200	1044500	1682000	1777300	121900	2701400	0	902900	4079400	4198000	2898600	0	0	0	Bacteria;Cyanobacteria;unclassified;Nostocales;Nostocaceae;Nodularia;spumigena;Nodularia spumigena CCY9414	Choline dehydrogenase and related flavoproteins
TCCM_0585.00000120	1645200	0	0	0	6225000	9707000	1080800	0	1423100	0	2178300	1834500	1169500	950190	0	941250	0	3767000	726400	336770	362010	1305700	2541900	1269400	0	1505400	1420200	1349500	2585200	57419	0	1122600	544530	997880	0	0	541150	Bacteria;Cyanobacteria;unclassified;Oscillatoriales;unclassified;Trichodesmium;erythraeum;Trichodesmium erythraeum IMS101	Nitrogenase molybdenum-iron protein, alpha and beta chains	KO:K04038	pfam00148
TCCM_0190.00000020	0	0	1362300	474470	2924900	4193000	1005200	0	0	0	0	0	2260700	2593300	0	0	0	0	0	0	0	0	1149500	75866	107850	975840	351010	729230	453110	0	0	0	0	0	1151500	1276000	357700	Bacteria;Cyanobacteria;unclassified;Oscillatoriales;unclassified;Trichodesmium;erythraeum;Trichodesmium erythraeum IMS101	Phycobilisome Linker polypeptide.	KO:K02290	pfam00427
TCCM_0178.00000130	0	729970	1353100	1600400	2357300	3968800	267110	270080	741980	789850	519720	0	1361800	1354800	265920	319730	168330	1481300	632070	134230	0	435080	697080	457180	0	960010	1077500	816110	413440	105320	0	437940	562170	371100	102460	841560	1093700	Bacteria;Cyanobacteria;unclassified;Oscillatoriales;unclassified;Trichodesmium;erythraeum;Trichodesmium erythraeum IMS101	Uncharacterized conserved protein		pfam03781
TCCM_0996.00000430	836830	0	0	0	5373100	8217100	659450	0	1199400	1167300	2380400	1229900	3640300	3895900	753420	904160	590490	1694200	555290	459860	819770	396870	877910	2709600	1961600	699710	721840	2012000	2773600	973790	0	0	326370	1173600	287730	859130	0	Bacteria;Cyanobacteria;unclassified;Oscillatoriales;unclassified;Trichodesmium;erythraeum;Trichodesmium erythraeum IMS101	Exoribonuclease R	KO:K12573	pfam00575
TCCM_0590.00000200	321110	0	2054100	2322100	4243200	6377400	781200	744500	792450	2197700	1863400	2713900	1710200	525400	759710	1962000	990720	4335000	813180	829120	1231500	2646600	3537600	2240500	1945700	2496600	1002900	2758900	3371000	415380	387970	1715100	2691200	1200000	0	0	1474600	Bacteria;Cyanobacteria;unclassified;Oscillatoriales;unclassified;Trichodesmium;erythraeum;Trichodesmium erythraeum IMS101
TCCM_0065.00003470	0	156980	2107800	1908500	2479900	3273600	58000	481800	4264900	2682500	2983500	1425700	2394400	3607000	795300	2143800	186000	4216000	0	421910	435300	389860	375400	1590400	920510	507450	725270	3090400	2483600	176680	0	272520	484060	1791400	339340	1009700	647020		Sulfotransferase domain.		pfam00685
TCCM_0803.00000010	4235000	5494300	6143800	5269400	10705000	16564000	2800100	995810	4218500	3861900	124000	0	2903600	2469000	1407000	5061800	2836600	6476400	4908700	688930	0	7253300	12462000	0	113670	8041100	5912000	928770	873130	603160	1051600	5799300	677520	597720	1655800	2551000	0	Bacteria;Cyanobacteria;unclassified;Oscillatoriales;unclassified;Trichodesmium;erythraeum;Trichodesmium erythraeum IMS101	NADH:ubiquinone oxidoreductase subunit 1 (chain H)	KO:K05572	pfam00146
TCCM_0013.00000060	2025600	1220100	2546400	2067900	2403000	3437600	258480	0	0	0	1804400	1648100	1699700	1588500	597790	905420	0	1147300	1284500	352850	196190	2430300	4246600	1890700	1292200	2989500	2180100	1128300	1209700	0	267520	1055400	892190	1259100	0	640620	343340	Bacteria;Cyanobacteria;unclassified;Oscillatoriales;unclassified;Trichodesmium;erythraeum;Trichodesmium erythraeum IMS101	light-dependent protochlorophyllide reductase	KO:K00218	pfam00106
TCCM_0123.00000030	0	0	1809300	1554600	2789400	1950100	844470	0	0	769700	2809600	1732500	1614200	2848100	1633100	661760	518040	1100900	158910	534510	494760	1523800	2478800	1618800	947070	1231600	786770	1370700	2350800	0	753180	741470	1108200	1020300	96782	540970	0	Bacteria;Cyanobacteria;unclassified;Oscillatoriales;unclassified;Trichodesmium;erythraeum;Trichodesmium erythraeum IMS101	Phenylalanyl-tRNA synthetase beta subunit	KO:K01890	pfam03483
[truncated: 3,630 more rows]
