# Supplementary material for: Co-occurrence of Fe and P stress in natural populations of the marine diazotroph Trichodesmium
Source: Copernicus journal article supplement (doi:10.5194/bg-2019-493), 2020-01-16
Supplement: Supplementary file 3 [file TableS4.xlsx]

## Sheet: TableS3.csv
Table S4. SOM cluster assignments for most abundant Trichodesmium proteins
Protein Accession	Product Name	KO	SOM Cluster Assignment
TCCM_0184.00000120	Peroxiredoxin		25
TCCM_0342.00000010	transaldolase, mycobacterial type	KO:K00616	25
TCCM_0011.00000010			25
TCCM_0160.00000020	Peptidyl-prolyl cis-trans isomerase (rotamase) - cyclophilin family		25
TCCM_0734.00000160	dihydroneopterin aldolase	KO:K01633	25
TCCM_0546.00000140	Pyruvate/2-oxoglutarate dehydrogenase complex, dihydrolipoamide dehydrogenase (E3) component, and related enzymes	KO:K00383	25
TCCM_0109.00000020	Predicted nucleoside-diphosphate-sugar epimerases		25
TCCM_0663.00000110	LL-diaminopimelate aminotransferase	KO:K10206	25
TCCM_0017.00000080	Ribosomal protein L13	KO:K02871	25
TCCM_0160.00000040	Peroxiredoxin	KO:K03564	25
TCCM_0074.00000280	naphthoate synthase (dihydroxynaphthoic acid synthetase)	KO:K01661	25
TCCM_0646.00000140	Glycosidases	KO:K01208	25
TCCM_0565.00000430	Predicted glutathione S-transferase	KO:K07393	25
TCCM_0319.00000040	Copper chaperone	KO:K07213	25
TCCM_0359.00000020	NTP pyrophosphohydrolases including oxidative damage repair enzymes	KO:K01515	25
TCCM_0079.00000040			25
TCCM_0645.00001880	Uncharacterized proteins involved in stress response, homologs of TerZ and putative cAMP-binding protein CABP1	KO:K05795	25
TCCM_0372.00000120	ABC-type amino acid transport/signal transduction systems, periplasmic component/domain	KO:K02030	25
TCCM_0494.00000040	ribosomal protein L18, bacterial type	KO:K02881	25
TCCM_0509.00000350	Molecular chaperone (small heat shock protein)		25
TCCM_0058.00000030			25
TCCM_0088.00000020	Uncharacterized protein conserved in bacteria		25
TCCM_0358.00000020			25
TCCM_0770.00000020	Plasmid stabilization system protein		25
TCCM_0805.00000280			25
TCCM_0130.00000300			25
TCCM_0519.00000190			25
TCCM_0963.00000120	Phage-related lysozyme (muraminidase)	KO:K01185	25
TCCM_0265.00001560	Immune inhibitor A peptidase M6.		25
TCCM_0954.00000080	Iron-sulfur cluster assembly accessory protein		25
TCCM_0338.00004430	Predicted UDP-glucose 6-dehydrogenase	KO:K00012	25
TCCM_0332.00000130			25
TCCM_0422.00000320			25
TCCM_0046.00000290	Uncharacterized proteins involved in stress response, homologs of TerZ and putative cAMP-binding protein CABP1	KO:K05795	25
TCCM_0996.00000020	FOG: FHA domain		25
TCCM_0230.00000110			25
TCCM_0789.00000290			25
TCCM_0927.00000160	Subtilase family./von Willebrand factor type D domain.		25
TCCM_0826.00000010	Osmosensitive K+ channel histidine kinase	KO:K07769	25
TCCM_0500.00000220	Methyl-accepting chemotaxis protein	KO:K02660	25
TCCM_0152.00000260	Uncharacterized protein conserved in bacteria		25
TCCM_0024.00000160	S-(hydroxymethyl)glutathione dehydrogenase/class III alcohol dehydrogenase	KO:K00121	25
TCCM_0268.00004300	Uncharacterized homolog of gamma-carboxymuconolactone decarboxylase subunit		25
TCCM_0439.00000090	magnesium chelatase ATPase subunit D	KO:K03404	25
TCCM_0471.00003340	50S ribosomal protein L3, bacterial	KO:K02906	25
TCCM_0650.00000120			25
TCCM_0670.00000010	peptide deformylase	KO:K01462	25
TCCM_0723.00000180			25
TCCM_0096.00000330	Photosystem II protein.	KO:K02705	25
TCCM_0955.00000260	Photosystem I reaction centre subunit IV / PsaE.	KO:K02693	25
TCCM_0102.00000790	Glycine/serine hydroxymethyltransferase	KO:K00600	25
TCCM_0884.00000370	1,4-alpha-glucan branching enzyme	KO:K00700	25
TCCM_0250.00000570	Uncharacterized conserved protein		25
TCCM_0448.00000610	Aspartyl-tRNA synthetase	KO:K01876	25
TCCM_0731.00000020	FOG: Ankyrin repeat		25
TCCM_0905.00000020	Uncharacterized protein conserved in bacteria	KO:K09989	25
TCCM_0235.00003900	Photosystem II protein.	KO:K02705	25
TCCM_0777.00001070	2,4-dihydroxyhept-2-ene-1,7-dioic acid aldolase	KO:K02510	25
TCCM_0348.00000780			25
TCCM_0645.00000340	Fe-S oxidoreductase		25
TCCM_0110.00000750			25
TCCM_0318.00000030	photosystem II chlorophyll-binding protein CP47	KO:K02704	24
TCCM_0751.00000490			24
TCCM_0716.00000100	Cytochrome b subunit of the bc complex	KO:K02635	24
TCCM_0027.00000050	light-independent protochlorophyllide reductase, iron-sulfur ATP-binding protein	KO:K04037	24
TCCM_0158.00001450	plastocyanin	KO:K02638	24
TCCM_0011.00002390			24
TCCM_0076.00000060	bacteriocin biosynthesis cyclodehydratase domain	KO:K09136	24
TCCM_0158.00000500	Polyketide synthase modules and related proteins		24
TCCM_0507.00000020	Diaminopimelate decarboxylase	KO:K01586	24
TCCM_0299.00003440			24
TCCM_0624.00000030	ABC-type multidrug transport system, ATPase and permease components	KO:K06147	24
TCCM_0277.00000560		KO:K03046	24
TCCM_0925.00000010	ABC-type multidrug transport system, ATPase component	KO:K01990	24
TCCM_0716.00000170			24
TCCM_0020.00000980			24
TCCM_0869.00000030	NAD/NADP transhydrogenase beta subunit	KO:K00325	24
TCCM_0532.00000030			24
TCCM_0052.00002300			24
TCCM_0976.00005240			24
TCCM_0013.00002790	Phycobilisome protein.		24
TCCM_0699.00000170			24
TCCM_0481.00000160	molybdenum ABC transporter, periplasmic molybdate-binding protein	KO:K02020	24
TCCM_0515.00000030	glutamate--cysteine ligase, cyanobacterial, putative		24
TCCM_0500.00000170			24
TCCM_0948.00000220	Chromosome segregation ATPases		24
TCCM_0127.00001430			24
TCCM_0270.00000020	ABC-type dipeptide/oligopeptide/nickel transport systems, permease components	KO:K02034	24
TCCM_0757.00000300	Phospholipase/lecithinase/hemolysin		24
TCCM_0890.00000020	K+-dependent Na+/Ca+ exchanger related-protein	KO:K07301	24
TCCM_0278.00000020	Beta-propeller repeat.		24
TCCM_0006.00000050	Rubredoxin		24
TCCM_0705.00000160			24
TCCM_0755.00000030	ABC-type multidrug transport system, ATPase and permease components	KO:K06147	24
TCCM_0281.00000320			24
TCCM_0873.00005820			24
TCCM_0065.00000020			23
TCCM_0339.00000200	ATPases of the AAA+ class		23
TCCM_0221.00000700			23
TCCM_0871.00000030	protein RecA	KO:K03553	23
TCCM_0372.00000040	Hemolysin-type calcium-binding repeat (2 copies).		23
TCCM_0862.00000020	L-lactate dehydrogenase (FMN-dependent) and related alpha-hydroxy acid dehydrogenases	KO:K00101	23
TCCM_0152.00000030	arginyl-tRNA synthetase	KO:K01887	23
TCCM_0185.00000280	cobalamin biosynthesis protein CobW	KO:K02234	23
TCCM_0453.00000320	Outer membrane protein/protective antigen OMA87	KO:K07277	23
TCCM_0447.00000120	Tryptophan-rich Synechocystis species C-terminal domain.		23
TCCM_0240.00000190			23
TCCM_0514.00000180	GUN4-like.		23
TCCM_0885.00000030			23
TCCM_0668.00000260	FKBP-type peptidyl-prolyl cis-trans isomerases 1	KO:K09575	23
TCCM_0970.00000190	Small-conductance mechanosensitive channel		23
TCCM_0313.00000190	PEP-CTERM putative exosortase interaction domain		23
TCCM_0985.00000030	ATP-dependent metalloprotease FtsH	KO:K03798	23
TCCM_0947.00000020	Carbohydrate-selective porin, OprB family./S-layer homology domain.		23
TCCM_0063.00000220	Obg family GTPase CgtA	KO:K03979	23
TCCM_0041.00000020	cryptochrome, DASH family	KO:K01669	23
TCCM_0305.00000020	thiamine-phosphate pyrophosphorylase	KO:K00788	23
TCCM_0060.00000020	Uncharacterized protein conserved in bacteria		23
TCCM_0481.00000320			23
TCCM_0014.00000080	Signal transduction histidine kinase regulating C4-dicarboxylate transport system	KO:K00908	23
TCCM_0731.00000170	Predicted hydrolases or acyltransferases (alpha/beta hydrolase superfamily)	KO:K01563	23
TCCM_0092.00000070	Membrane protease subunits, stomatin/prohibitin homologs		23
TCCM_0360.00000030	Predicted oxidoreductases (related to aryl-alcohol dehydrogenases)		23
TCCM_0060.00000260	MoxR-like ATPases		23
TCCM_0860.00000110			23
TCCM_0084.00005960	ATP phosphoribosyltransferase, C-terminal domain	KO:K00765	23
TCCM_0385.00000140			23
TCCM_0619.00000040	Phage-related tail protein		23
TCCM_0055.00000060	Uncharacterized protein conserved in cyanobacteria		23
TCCM_0257.00000180	Predicted transcriptional regulators	KO:K07978	23
TCCM_0812.00000200	Methionine synthase II (cobalamin-independent)	KO:K00549	23
TCCM_0145.00000080			23
TCCM_0766.00000150	ATPases involved in chromosome partitioning		23
TCCM_0423.00000010	Dynamin family.		23
TCCM_0443.00000020	ABC-type uncharacterized transport system, permease and ATPase components	KO:K02471	23
TCCM_0072.00000010	Signal transduction histidine kinase		23
TCCM_0289.00000150			23
TCCM_0479.00000550			23
TCCM_0354.00000040	C-3'',4'' desaturase CrtD		23
TCCM_0502.00000040			23
TCCM_0530.00000030	Hydrogenase maturation factor	KO:K04656	23
TCCM_0819.00000110	Asp-tRNAAsn/Glu-tRNAGln amidotransferase A subunit and related amidases	KO:K01426	23
TCCM_0695.00000100			23
TCCM_0726.00000010	Methionine synthase I (cobalamin-dependent), methyltransferase domain	KO:K00548	23
TCCM_0106.00000150	Glycosyltransferases, probably involved in cell wall biogenesis		23
TCCM_0916.00000010	MutS2 family protein	KO:K07456	23
TCCM_0250.00000050	ABC-type phosphonate transport system, ATPase component	KO:K05781	23
TCCM_0634.00002880	Photosystem I reaction centre subunit XI.	KO:K02705	23
TCCM_0370.00000030	TIGR00266 family protein		23
TCCM_0611.00001610			23
TCCM_0078.00000260	Molecular chaperone, HSP90 family	KO:K04079	22
TCCM_0249.00000650			22
TCCM_0545.00000290	F0F1-type ATP synthase, beta subunit	KO:K02112	22
TCCM_0429.00000170	Type II secretory pathway, pullulanase PulA and related glycosidases	KO:K02438	22
TCCM_0043.00002000	F0F1-type ATP synthase, subunit b	KO:K02109	22
TCCM_0023.00005630			22
TCCM_0314.00000030	cytochrome c oxidase, subunit I	KO:K02274	22
TCCM_0098.00000040	Anti-sigma regulatory factor (Ser/Thr protein kinase)	KO:K04757	22
TCCM_0182.00000040	Membrane proteins related to metalloendopeptidases	KO:K08259	22
TCCM_0666.00000260			22
TCCM_0450.00000200			22
TCCM_0221.00000260			22
TCCM_0119.00000140	Developmentally Regulated MAPK Interacting Protein.		22
TCCM_0292.00000090	Putative N-acetylmannosamine-6-phosphate epimerase	KO:K01788	22
TCCM_0116.00000070			22
TCCM_0392.00000170	Predicted NTPase (NACHT family)		22
TCCM_0571.00000470	Argininosuccinate lyase	KO:K01755	22
TCCM_0029.00000020			22
TCCM_0316.00000030	Predicted sugar isomerase		22
TCCM_0620.00000130	Serine/threonine protein kinase		22
TCCM_0085.00000020	Spermidine/putrescine-binding periplasmic protein		22
TCCM_0365.00000330	ketol-acid reductoisomerase	KO:K00053	22
TCCM_0323.00000030	2-polyprenyl-3-methyl-5-hydroxy-6-metoxy-1,4-benzoquinol methylase		22
TCCM_0206.00000290	DnaJ-class molecular chaperone with C-terminal Zn finger domain		22
TCCM_0773.00000300	Subtilase family.		22
TCCM_0836.00000310	Phosphate starvation-inducible protein PhoH, predicted ATPase	KO:K06217	22
TCCM_0566.00000080	4-diphosphocytidyl-2-methyl-D-erithritol synthase	KO:K00991	22
TCCM_0836.00000320	ChuX-like family.		22
TCCM_0336.00000690			22
TCCM_0819.00000220			22
TCCM_0855.00004990	Predicted flavoprotein involved in K+ transport	KO:K00485	22
TCCM_0584.00000530	Polyketide synthase modules and related proteins		22
TCCM_0184.00004630	Polyketide synthase modules and related proteins	KO:K12436	22
TCCM_0616.00000020	superoxide dismutase, Ni	KO:K00518	21
TCCM_0570.00000250	Molecular chaperone	KO:K04043	21
TCCM_0012.00000020	Nucleoside diphosphate kinase	KO:K00940	21
TCCM_0162.00000030	Asparaginase	KO:K01424	21
TCCM_0025.00000060	Photosystem I psaA/psaB protein.	KO:K02689	21
TCCM_0298.00000490			21
TCCM_0034.00000250	Cytochrome b subunit of the bc complex	KO:K02635	21
TCCM_0455.00000140			21
TCCM_0379.00000010			21
TCCM_0617.00000350	Dehydrogenases with different specificities (related to short-chain alcohol dehydrogenases)		21
TCCM_0634.00002820	ABC-type proline/glycine betaine transport systems, periplasmic components	KO:K02002	21
TCCM_0050.00000220			21
TCCM_0696.00000100	Peptidyl-prolyl cis-trans isomerase (rotamase) - cyclophilin family	KO:K03768	21
TCCM_0927.00000020	ATPases with chaperone activity, ATP-binding subunit	KO:K03696	21
TCCM_0268.00000180	Type II secretory pathway, pullulanase PulA and related glycosidases	KO:K02438	21
TCCM_0250.00000040	Uncharacterized enzyme of phosphonate metabolism	KO:K06163	21
TCCM_0133.00000040			21
TCCM_0655.00000300	Predicted unusual protein kinase		21
TCCM_0508.00000020	Uncharacterized conserved protein	KO:K09138	21
TCCM_0353.00000030	Uncharacterized protein conserved in bacteria		21
TCCM_0914.00003810	Subtilisin-like serine proteases	KO:K01362	21
TCCM_0199.00000300	anti-anti-sigma factor		21
TCCM_0297.00000020	Transposase and inactivated derivatives	KO:K07499	21
TCCM_0266.00000140			21
TCCM_0012.00005070	Predicted N-acetylglucosaminyl transferase		21
TCCM_0429.00000020			21
TCCM_0782.00000210			21
TCCM_0371.00000040	ribosomal RNA small subunit methyltransferase RsmB	KO:K03500	21
TCCM_0082.00000020	4-hydroxythreonine-4-phosphate dehydrogenase	KO:K00097	21
TCCM_0296.00000040	Serine/threonine protein kinase		21
TCCM_0011.00000050			21
TCCM_0825.00000030	uncharacterized domain HDIG	KO:K07037	21
TCCM_0016.00000010			21
TCCM_0090.00000590			21
TCCM_0847.00000070	Ribonuclease HI	KO:K03469	21
TCCM_0223.00000020			21
TCCM_0250.00000010		KO:K06166	21
TCCM_0001.00000010			21
TCCM_0528.00000180	Uncharacterized conserved protein		21
TCCM_0146.00000010	ABC-type sugar transport system, periplasmic component	KO:K02027	21
TCCM_0094.00002860	Flavodoxins	KO:K03839	21
TCCM_0216.00000020			21
TCCM_0571.00004110	Photosystem II protein.	KO:K02704	21
TCCM_0470.00000030			21
TCCM_0501.00000350			21
TCCM_0575.00004040		KO:K01802	21
TCCM_0704.00003060			21
TCCM_0770.00000120	Pheophorbide a oxygenase.		21
TCCM_0909.00000010	Adenylate cyclase, family 3 (some proteins contain HAMP domain)		21
TCCM_0296.00000190	Uncharacterized protein/domain associated with GTPases		21
TCCM_0007.00000850			21
TCCM_0165.00000020	Ketosteroid isomerase homolog		21
TCCM_0222.00000140	Undecaprenyl pyrophosphate synthase		21
TCCM_0305.00000170	hopanoid biosynthesis associated radical SAM protein HpnJ		21
TCCM_0141.00000030	Predicted ATPase		21
TCCM_0564.00000090	Uncharacterized protein encoded in toxicity protection region of plasmid R478, contains von Willebrand factor (vWF) domain		21
TCCM_0284.00000310			21
TCCM_0926.00000020	Fumarase	KO:K01679	21
TCCM_0013.00000040	ABC-type multidrug transport system, ATPase component		21
TCCM_0035.00000030	Organic solvent tolerance protein OstA		21
TCCM_0483.00000080	Predicted Zn-dependent proteases and their inactivated homologs	KO:K03568	21
TCCM_0335.00005250	Polyketide synthase modules and related proteins	KO:K13614	21
TCCM_0664.00000020	ribosome biogenesis GTP-binding protein YlqF	KO:K06948	21
TCCM_0222.00000280			21
TCCM_0744.00002300	tRNA-(guanine-N1)-methyltransferase	KO:K00554	21
TCCM_0181.00000250			21
TCCM_0557.00000490			21
TCCM_0744.00000150	Flagellar biosynthesis/type III secretory pathway protein		21
TCCM_0253.00000020			21
TCCM_0350.00000490			21
TCCM_0558.00000010			21
TCCM_0374.00000720	Tfp pilus assembly protein PilF		21
TCCM_0389.00000280	probable sodium:solute symporter, VC_2705 subfamily	KO:K03307	21
TCCM_0170.00000980			21
TCCM_0832.00000020	Peptidase family M50.		21
TCCM_0108.00000030	Predicted hydrolases or acyltransferases (alpha/beta hydrolase superfamily)		21
TCCM_0953.00000170	Predicted glutathione S-transferase	KO:K07393	21
TCCM_0549.00000020	hydroxyacylglutathione hydrolase	KO:K01069	21
TCCM_0803.00000200	Flp pilus assembly protein TadD, contains TPR repeats		21
TCCM_0764.00000180	Mg2+ transporter (mgtE)	KO:K06213	21
TCCM_0158.00000010	Serine phosphatase RsbU, regulator of sigma subunit	KO:K07315	21
TCCM_0829.00000300	Serine proteases of the peptidase family S9A	KO:K01322	21
TCCM_0031.00000020	Adenylate cyclase, family 3 (some proteins contain HAMP domain)		21
TCCM_0352.00000010	GDSL-like Lipase/Acylhydrolase.		21
TCCM_0054.00000030	DnaJ-class molecular chaperone with C-terminal Zn finger domain	KO:K05516	21
TCCM_0422.00000790	Tetratricopeptide repeat.		21
TCCM_0697.00000010			21
TCCM_0294.00000020	Biopolymer transport protein	KO:K03559	21
TCCM_0041.00000040	ferredoxin [2Fe-2S]	KO:K02639	21
TCCM_0723.00000120			21
TCCM_0577.00005200	FKBP-type peptidyl-prolyl cis-trans isomerase (trigger factor)	KO:K03545	21
TCCM_0543.00000130			21
TCCM_0053.00000030			21
TCCM_0816.00000950	Putative peptidoglycan-binding domain-containing protein		21
TCCM_0605.00001970	Phycobilisome protein.		21
TCCM_0461.00000010	transporter, SSS family	KO:K03307	21
TCCM_0098.00000190	Predicted Rossmann fold nucleotide-binding protein involved in DNA uptake		21
TCCM_0368.00000030	phosphoglucosamine mutase	KO:K03431	21
TCCM_0472.00000020	penicillin-binding protein, 1A family		21
TCCM_0688.00003520	ATP-dependent Zn proteases	KO:K03798	21
TCCM_0451.00000010	Predicted transmembrane transcriptional regulator (anti-sigma factor)		21
TCCM_0502.00000030			21
TCCM_0477.00000020			21
TCCM_0190.00003480			21
TCCM_0489.00000380			21
TCCM_0373.00000920	Phosphomannomutase	KO:K01835	21
TCCM_0093.00000060	haloacid dehalogenase superfamily, subfamily IA, variant 3 with third motif having DD or ED		21
TCCM_0139.00000040	Carbohydrate-selective porin, OprB family./S-layer homology domain.		20
TCCM_0248.00000020	photosystem II 44 kDa subunit reaction center protein (also called P6 protein, CP43), bacterial and chloroplast	KO:K02705	20
TCCM_0018.00000040	phosphate ABC transporter, phosphate-binding protein	KO:K02040	20
TCCM_0907.00000010	RTX toxins and related Ca2+-binding proteins		20
TCCM_0469.00000030	Glycine/serine hydroxymethyltransferase	KO:K00600	20
TCCM_0054.00000320	Methylase involved in ubiquinone/menaquinone biosynthesis		20
TCCM_0151.00000140	ferredoxin [2Fe-2S]	KO:K02639	20
TCCM_0178.00000040	spermidine/putrescine ABC transporter ATP-binding subunit	KO:K11072	20
TCCM_0009.00000040	Uncharacterized flavoproteins		20
TCCM_0972.00002220	Gas vesicle synthesis protein GvpL/GvpF.		20
TCCM_0983.00000140	acetyl-CoA carboxylase, biotin carboxyl carrier protein	KO:K02160	20
TCCM_0074.00000020	opcA protein		20
TCCM_0030.00000280	S-layer homology domain.		20
TCCM_0091.00000120	Photosystem II protein.	KO:K02705	20
TCCM_0605.00000170	ABC-type metal ion transport system, periplasmic component/surface adhesin	KO:K09818	20
TCCM_0138.00000020	Archaeal ATPase.		20
TCCM_0301.00003090	Chaperonin GroEL (HSP60 family)	KO:K04077	20
TCCM_0601.00000350	Predicted dehydrogenase		20
TCCM_0976.00000010	PBS lyase HEAT-like repeat.	KO:K05385	20
TCCM_0828.00000230	Predicted integral membrane protein		20
TCCM_0841.00000230	Methylase involved in ubiquinone/menaquinone biosynthesis		20
TCCM_0765.00000010	Uncharacterized conserved protein		20
TCCM_0534.00000030			20
TCCM_0224.00000170	FOG: HEAT repeat		20
TCCM_0694.00000020	SnoaL-like polyketide cyclase.		20
TCCM_0449.00000020			20
TCCM_0656.00000110			20
TCCM_0997.00000390	phosphohistidine phosphatase SixA	KO:K08296	20
TCCM_0107.00000510	membrane complex biogenesis protein, BtpA family	KO:K06971	20
TCCM_0037.00000050	ATPase components of ABC transporters with duplicated ATPase domains	KO:K06020	20
TCCM_0493.00000470	Isoleucyl-tRNA synthetase	KO:K01870	20
TCCM_0373.00000600			20
TCCM_0172.00000020	Sulfotransferase domain.		20
TCCM_0822.00000130	Secreted and surface protein containing fasciclin-like repeats		19
TCCM_0299.00000520			19
TCCM_0400.00005970	Nitrogen regulatory protein PII	KO:K04751	19
TCCM_0908.00000010	Fructose-1,6-bisphosphatase/sedoheptulose 1,7-bisphosphatase and related proteins	KO:K11532	19
TCCM_0654.00000050	Fructose-1,6-bisphosphatase	KO:K03841	19
TCCM_0874.00000020			19
TCCM_0329.00003540	Tetratricopeptide repeat.		19
TCCM_0246.00001640	Coproporphyrinogen III oxidase	KO:K00228	19
TCCM_0853.00003350			19
TCCM_0177.00000020	Chemotaxis protein histidine kinase and related kinases		19
TCCM_0541.00002550	F0F1-type ATP synthase, alpha subunit	KO:K02111	19
TCCM_0852.00000230			19
TCCM_0316.00000160	Ribosomal protein L25 (general stress protein Ctc)	KO:K02897	19
TCCM_0855.00000160	RTX toxins and related Ca2+-binding proteins		19
TCCM_0303.00000030			19
TCCM_0899.00000040	Polyketide synthase modules and related proteins		19
TCCM_0742.00002930	Adenylate kinase and related kinases	KO:K00939	19
TCCM_0043.00000290			19
TCCM_0120.00000150	Type II secretory pathway, pullulanase PulA and related glycosidases	KO:K02438	19
TCCM_0051.00000210	amidohydrolase	KO:K01436	19
TCCM_0863.00000020	ABC-type multidrug transport system, permease component	KO:K09686	19
TCCM_0816.00000550	Formate hydrogenlyase subunit 6/NADH:ubiquinone oxidoreductase 23 kD subunit (chain I)	KO:K05580	19
TCCM_0032.00002750			19
TCCM_0996.00000170			19
TCCM_0199.00000550	N-acetylglucosamine-1-phosphate uridyltransferase (contains nucleotidyltransferase and I-patch acetyltransferase domains)	KO:K04042	19
TCCM_0860.00000140	Predicted oxidoreductases (related to aryl-alcohol dehydrogenases)	KO:K05885	19
TCCM_0544.00000010	UDP-N-acetylglucosamine enolpyruvyl transferase	KO:K00790	19
TCCM_0442.00000420			19
TCCM_0596.00000190			19
TCCM_0500.00000780			19
TCCM_0091.00000130	Photosystem II protein.	KO:K02705	19
TCCM_0445.00000500	Polyketide synthase modules and related proteins	KO:K13614	19
TCCM_0089.00000290			19
TCCM_0070.00000180	Cobalamin biosynthesis protein CobN and related Mg-chelatases	KO:K03403	19
TCCM_0649.00001650	Uncharacterized protein conserved in bacteria with the myosin-like domain		19
TCCM_0752.00000020	Uncharacterized protein conserved in bacteria	KO:K08309	19
TCCM_0301.00000410	Spermidine synthase	KO:K00797	19
TCCM_0906.00000010			19
TCCM_0061.00000290	RNA polymerase sigma factor, sigma-70 family	KO:K03087	19
TCCM_0228.00000260	ABC-type multidrug transport system, ATPase component	KO:K01990	19
TCCM_0688.00000160	Response regulator containing CheY-like receiver, AAA-type ATPase, and DNA-binding domains		19
TCCM_0848.00000010	DnaJ-class molecular chaperone with C-terminal Zn finger domain		19
TCCM_0753.00000030			19
TCCM_0291.00000380	Carbon dioxide concentrating mechanism/carboxysome shell protein	KO:K08700	19
TCCM_0801.00000400	Polyketide synthase modules and related proteins		19
TCCM_0072.00000810			19
TCCM_0453.00000170			19
TCCM_0897.00000440	Large extracellular alpha-helical protein	KO:K06894	19
TCCM_0265.00000510	Outer membrane protein	KO:K03287	19
TCCM_0630.00000020	1-deoxy-D-xylulose 5-phosphate reductoisomerase		19
TCCM_0001.00000060			19
TCCM_0531.00000020	ATPase involved in DNA repair	KO:K03546	19
TCCM_0022.00000280	3-dehydroquinate dehydratase, type II	KO:K03786	19
TCCM_0300.00000330	Enzyme involved in the deoxyxylulose pathway of isoprenoid biosynthesis	KO:K03526	19
TCCM_0941.00001180	RNA-binding proteins (RRM domain)		19
TCCM_0638.00000240			19
TCCM_0245.00000020	Predicted NTPase (NACHT family)		19
TCCM_0373.00000030	cobalamin biosynthesis protein CbiD	KO:K02188	19
TCCM_0038.00000190		KO:K01448	19
TCCM_0261.00000190	ATP adenylyltransferase (5'',5''''''-P-1,P-4-tetraphosphate phosphorylase II)	KO:K00988	19
TCCM_0780.00000170	Predicted hydrolases or acyltransferases (alpha/beta hydrolase superfamily)		19
TCCM_0006.00000070			19
TCCM_0015.00001090	Polyribonucleotide nucleotidyltransferase (polynucleotide phosphorylase)	KO:K00962	19
TCCM_0402.00000040	Sua5/YciO/YrdC/YwlC family protein	KO:K07566	19
TCCM_0234.00000050	phosphoribosylaminoimidazole carboxylase, PurK protein	KO:K01589	19
TCCM_0165.00000330	Precorrin-6B methylase 2	KO:K00595	19
TCCM_0376.00000240			19
TCCM_0107.00000020			19
TCCM_0113.00000020			19
TCCM_0023.00000020			19
TCCM_0090.00000160	Outer membrane protein and related peptidoglycan-associated (lipo)proteins		19
TCCM_0683.00000500	Glycosyltransferase		19
TCCM_0108.00000040	RNA polymerase sigma factor, sigma-70 family/RNA polymerase sigma factor, cyanobacterial RpoD-like family	KO:K03087	19
TCCM_0451.00000200	D-alanyl-D-alanine carboxypeptidase, serine-type, PBP4 family	KO:K07259	19
TCCM_0215.00000010	Putative Zn-dependent protease, contains TPR repeats		19
TCCM_0239.00000060			19
TCCM_0085.00000370			19
TCCM_0306.00000150	imidazole glycerol phosphate synthase, glutamine amidotransferase subunit	KO:K02501	19
TCCM_0535.00005260	Short-chain dehydrogenases of various substrate specificities		19
TCCM_0255.00000210	Ferredoxin-dependent bilin reductase.	KO:K05370	19
TCCM_0685.00000180	Prephenate dehydratase	KO:K04518	19
TCCM_0468.00000110	Predicted metal-dependent hydrolase of the TIM-barrel fold		19
TCCM_0449.00000040	Predicted hydrolases or acyltransferases (alpha/beta hydrolase superfamily)		19
TCCM_0644.00000020	Polyketide synthase modules and related proteins		18
TCCM_0234.00000160			18
TCCM_0034.00000240	C-terminal peptidase (prc)	KO:K03797	18
TCCM_0853.00003340			18
TCCM_0374.00000260	Polyketide synthase modules and related proteins		18
TCCM_0899.00000210	Non-ribosomal peptide synthetase modules and related proteins		18
TCCM_0896.00000390	Polyketide synthase modules and related proteins		18
TCCM_0233.00000200	Glutamine synthetase	KO:K01915	18
TCCM_0768.00000110	ATP-dependent metalloprotease FtsH	KO:K03798	18
TCCM_0708.00000440	Uncharacterized protein conserved in bacteria (DUF2252).		18
TCCM_0478.00000060	Peroxiredoxin	KO:K03386	18
TCCM_0971.00000020	Inosine-uridine nucleoside N-ribohydrolase	KO:K01239	18
TCCM_0834.00000020	Phytoene dehydrogenase and related proteins		18
TCCM_0095.00000390	GTP-binding protein LepA	KO:K03596	18
TCCM_0924.00001000			18
TCCM_0639.00000110	Cobalamin biosynthesis protein CobN and related Mg-chelatases	KO:K03403	18
TCCM_0231.00000020	Predicted phosphatase	KO:K07093	18
TCCM_0768.00000960	F0F1-type ATP synthase, subunit b	KO:K02109	18
TCCM_0018.00000070	ABC-type phosphate transport system, permease component	KO:K02037	18
TCCM_0049.00000060			18
TCCM_0379.00000050	Coproporphyrinogen III oxidase	KO:K00228	18
TCCM_0499.00000020	amino acid carrier protein	KO:K03310	18
TCCM_0391.00000120	Hemolysin-type calcium-binding repeat (2 copies).		18
TCCM_0350.00000290	Uncharacterized protein conserved in bacteria		18
TCCM_0231.00003690			18
TCCM_0213.00000010	urease, alpha subunit	KO:K01428	18
TCCM_0527.00000370	Predicted nucleotide-utilizing enzyme related to molybdopterin-biosynthesis enzyme MoeA	KO:K03742	18
TCCM_0156.00000030	3-oxoacyl-(acyl-carrier-protein) synthase III	KO:K00648	18
TCCM_0295.00000250	Uncharacterized protein conserved in bacteria	KO:K09748	18
TCCM_0179.00001000	NADPH:quinone reductase and related Zn-dependent oxidoreductases		18
TCCM_0146.00000020	folylpolyglutamate synthase/dihydrofolate synthase	KO:K01930	18
TCCM_0846.00000020			18
TCCM_0559.00001150			18
TCCM_0066.00000220	Signal transduction histidine kinase		18
TCCM_0083.00003350	PsaD.	KO:K02692	18
TCCM_0532.00000290			18
TCCM_0314.00000290			18
TCCM_0256.00000270	2-polyprenyl-6-methoxyphenol hydroxylase and related FAD-dependent oxidoreductases		18
TCCM_0357.00001890	Transcriptional regulator		18
TCCM_0488.00000020			18
TCCM_0301.00000630			18
TCCM_0288.00000040	Entner-Doudoroff aldolase	KO:K01625	18
TCCM_0855.00000030	haloacid dehalogenase superfamily, subfamily IA, variant 3 with third motif having DD or ED	KO:K01838	18
TCCM_0584.00000020	Phycobilisome Linker polypeptide./CpcD/allophycocyanin linker domain.		17
TCCM_0115.00000030	Phage-related lysozyme (muraminidase)		17
TCCM_0550.00000140	Membrane proteins related to metalloendopeptidases	KO:K02634	17
TCCM_0690.00000410	Glyceraldehyde-3-phosphate dehydrogenase/erythrose-4-phosphate dehydrogenase	KO:K00150	17
TCCM_0123.00000020	Phenylalanyl-tRNA synthetase beta subunit	KO:K01890	17
TCCM_0018.00000340	Universal stress protein UspA and related nucleotide-binding proteins		17
TCCM_0466.00000010	endopeptidase Clp ATP-binding regulatory subunit (clpX)	KO:K03544	17
TCCM_0541.00000250	Predicted oxidoreductases (related to aryl-alcohol dehydrogenases)	KO:K05882	17
TCCM_0083.00000010	glucokinase, proteobacterial type	KO:K00845	17
TCCM_0827.00000020	Dynamin family.		17
TCCM_0247.00000010	Uncharacterized protein conserved in bacteria	KO:K09772	17
TCCM_0111.00000030	membrane protein insertase, YidC/Oxa1 family, C-terminal domain	KO:K03217	17
TCCM_0263.00000500	Glyceraldehyde-3-phosphate dehydrogenase/erythrose-4-phosphate dehydrogenase	KO:K00134	17
TCCM_0233.00000120	peptide chain release factor 3	KO:K02837	17
TCCM_0240.00000200		KO:K00540	17
TCCM_0518.00000040	ribosomal protein L22, bacterial type	KO:K02890	17
TCCM_0166.00000020	KAP family P-loop domain.		17
TCCM_0289.00000030	Predicted transcriptional regulator		17
TCCM_0307.00003630			17
TCCM_0997.00000100	magnesium-protoporphyrin IX monomethyl ester aerobic oxidative cyclase	KO:K04035	17
TCCM_0338.00000040	tRNA nucleotidyltransferase/poly(A) polymerase	KO:K00970	17
TCCM_0298.00000160	Glycerol kinase	KO:K00864	17
TCCM_0288.00000140	Acetyltransferases		17
TCCM_0712.00000040	Phycobilisome Linker polypeptide.	KO:K02096	17
TCCM_0974.00000250	Glycosyltransferases involved in cell wall biogenesis		17
TCCM_0230.00000010	ABC-type multidrug transport system, ATPase and permease components	KO:K06147	17
TCCM_0050.00000230	Flp pilus assembly protein TadD, contains TPR repeats		17
TCCM_0175.00000120	Small-conductance mechanosensitive channel	KO:K03442	17
TCCM_0356.00000010	Cysteine sulfinate desulfinase/cysteine desulfurase and related enzymes	KO:K04487	17
TCCM_0911.00000030	RNA polymerase sigma factor, sigma-70 family/RNA polymerase sigma factor, cyanobacterial RpoD-like family	KO:K03087	17
TCCM_0439.00000130	2-polyprenyl-6-methoxyphenol hydroxylase and related FAD-dependent oxidoreductases		17
TCCM_0529.00000730			17
TCCM_0857.00000070	RNA polymerase sigma factor, sigma-70 family/RNA polymerase sigma factor, cyanobacterial RpoD-like family	KO:K03087	17
TCCM_0139.00000240			17
TCCM_0178.00000010	ABC-type spermidine/putrescine transport system, permease component II	KO:K02053	17
TCCM_0128.00000210	Response regulators consisting of a CheY-like receiver domain and a winged-helix DNA-binding domain		17
TCCM_0032.00004020			17
TCCM_0440.00000030	Deacetylases, including yeast histone deacetylase and acetoin utilization protein		17
TCCM_0089.00000040	amidohydrolase	KO:K01436	17
TCCM_1000.00000010	Co-chaperonin GroES (HSP10)		16
TCCM_0649.00000040	Glyceraldehyde-3-phosphate dehydrogenase/erythrose-4-phosphate dehydrogenase	KO:K00150	16
TCCM_0898.00000030	Trypsin-like serine proteases, typically periplasmic, contain C-terminal PDZ domain	KO:K08070	16
TCCM_0419.00000330			16
TCCM_0579.00001230			16
TCCM_0490.00000030	thioredoxin		16
TCCM_0037.00000020	Peptidyl-prolyl cis-trans isomerase (rotamase) - cyclophilin family	KO:K01802	16
TCCM_0881.00000030	Ribonuclease I		16
TCCM_0159.00000040			16
TCCM_0690.00000020	glutathione synthetase, prokaryotic	KO:K01920	16
TCCM_0225.00000050	Cysteine synthase	KO:K01738	16
TCCM_0001.00000560	Nucleoside-diphosphate-sugar epimerases	KO:K01784	16
TCCM_0219.00000020	Translation initiation factor IF-2, N-terminal region.	KO:K02519	16
TCCM_0983.00000540	ribosomal protein S21	KO:K02970	16
TCCM_0149.00000070	Type IIA topoisomerase (DNA gyrase/topo II, topoisomerase IV), B subunit	KO:K02470	16
TCCM_0161.00002540			16
TCCM_0590.00000250	Uncharacterized protein conserved in bacteria	KO:K09942	16
TCCM_0388.00000260			16
TCCM_0149.00000050	2-polyprenyl-3-methyl-5-hydroxy-6-metoxy-1,4-benzoquinol methylase		16
TCCM_0785.00000100	Dehydrogenases (flavoproteins)		16
TCCM_0122.00000020	Heme/copper-type cytochrome/quinol oxidases, subunit 2	KO:K02275	16
TCCM_0181.00000050	Uncharacterized protein conserved in bacteria		16
TCCM_0799.00000290			16
TCCM_0882.00000050	type IV pilus assembly protein PilM	KO:K02662	16
TCCM_0972.00000150	Chromosome segregation ATPases		16
TCCM_0813.00000110	Uncharacterized low-complexity proteins		16
TCCM_0528.00000010	Superfamily II DNA helicase	KO:K03654	16
TCCM_0610.00000030			16
TCCM_0186.00000280			16
TCCM_0640.00000110			16
TCCM_0592.00000140			16
TCCM_0548.00000190	photosystem II reaction center protein Psb28	KO:K08903	16
TCCM_0084.00000600	Large extracellular alpha-helical protein	KO:K06894	16
TCCM_0201.00005920			16
TCCM_0037.00000450			16
TCCM_0066.00000310	Molecular chaperone (small heat shock protein)		16
TCCM_0125.00000770	cell division topological specificity factor MinE	KO:K03608	16
TCCM_0461.00000020	transporter, SSS family	KO:K03307	16
TCCM_0388.00000160	PPOX class probable FMN-dependent enzyme, alr4036 family		16
TCCM_0032.00002110			16
TCCM_0209.00000030			16
TCCM_0300.00002610	Glyceraldehyde-3-phosphate dehydrogenase/erythrose-4-phosphate dehydrogenase	KO:K00150	16
TCCM_0584.00000030	Phycobilisome Linker polypeptide./CpcD/allophycocyanin linker domain.	KO:K05380	15
TCCM_0630.00000160	Photosystem I reaction centre subunit III.	KO:K02694	15
TCCM_0853.00000160	cysteine synthase A	KO:K01738	15
TCCM_0339.00000010	Uncharacterized proteins involved in stress response, homologs of TerZ and putative cAMP-binding protein CABP1	KO:K05795	15
TCCM_0040.00000050	NADH dehydrogenase, FAD-containing subunit	KO:K03885	15
TCCM_0691.00000010	Oxyanion-translocating ATPase	KO:K01551	15
TCCM_0812.00003380	Cyclopropane fatty acid synthase and related methyltransferases		15
TCCM_0009.00000070	Uncharacterized flavoproteins		15
TCCM_0689.00000490			15
TCCM_0842.00000070	Outer membrane protein		15
TCCM_0871.00000020	RecA/RadA recombinase	KO:K03553	15
TCCM_0458.00000190	CHRD domain.		15
TCCM_0284.00000230	Domain of Unknown Function (DUF928).		15
TCCM_0442.00000130	magnesium-protoporphyrin IX monomethyl ester aerobic oxidative cyclase	KO:K04035	15
TCCM_0995.00000030			15
TCCM_0294.00000010	Biopolymer transport proteins	KO:K03561	15
TCCM_0067.00000200	dTDP-4-dehydrorhamnose reductase	KO:K00067	15
TCCM_0088.00000230	Putative Zn-dependent protease, contains TPR repeats		15
TCCM_0322.00000020	KaiA domain.	KO:K08480	15
TCCM_0029.00000050	DNA polymerase sliding clamp subunit (PCNA homolog)	KO:K02338	15
TCCM_0671.00000220	dTDP-glucose 4,6-dehydratase	KO:K01710	15
TCCM_0013.00000050	D-alanyl-D-alanine carboxypeptidase (penicillin-binding protein 4)	KO:K07259	15
TCCM_0521.00000100	ABC-type branched-chain amino acid transport systems, periplasmic component		15
TCCM_0636.00000010	Predicted Zn-dependent proteases and their inactivated homologs	KO:K03592	15
TCCM_0060.00000500	Large extracellular alpha-helical protein	KO:K06894	15
TCCM_0735.00000090	Molybdopterin biosynthesis enzyme	KO:K03750	15
TCCM_0221.00000210			15
TCCM_0982.00000500			15
TCCM_0096.00000010	N-methylhydantoinase B/acetone carboxylase, alpha subunit	KO:K01469	15
TCCM_0151.00000010	ribosomal protein L11 methyltransferase	KO:K02687	15
TCCM_0576.00000130	Trypsin-like serine proteases, typically periplasmic, contain C-terminal PDZ domain		15
TCCM_0172.00000160	Cobalamin biosynthesis protein CobN and related Mg-chelatases	KO:K03403	15
TCCM_0445.00001310	ADP-glucose pyrophosphorylase	KO:K00975	15
TCCM_0835.00000200	von Willebrand factor type D domain.		15
TCCM_0939.00000010	chaperonin GroL	KO:K04077	14
TCCM_0640.00000010	flavodoxin, long chain	KO:K03839	14
TCCM_0430.00000010	trigger factor	KO:K03545	14
TCCM_0397.00000050	cyanobactin maturation protease, PatA/PatG family		14
TCCM_0708.00000030	Uncharacterized protein conserved in bacteria		14
TCCM_0773.00000080	phosphopyruvate hydratase	KO:K01689	14
TCCM_0366.00000020	ribose 5-phosphate isomerase	KO:K01807	14
TCCM_0494.00000070	Ribosomal protein L5	KO:K02931	14
TCCM_0347.00000290	Monoamine oxidase		14
TCCM_0208.00000050	DNA-binding protein, YbaB/EbfC family	KO:K09747	14
TCCM_0824.00000030	Spermidine synthase	KO:K00797	14
TCCM_0149.00000350	PsbP.	KO:K02717	14
TCCM_0375.00000350	Tellurite resistance protein TerB.		14
TCCM_0249.00000170	Beta-propeller domains of methanol dehydrogenase type	KO:K06872	14
TCCM_0049.00000280	Type II secretory pathway, pullulanase PulA and related glycosidases	KO:K02438	14
TCCM_0962.00000030	5''/3''-nucleotidase SurE	KO:K03787	14
TCCM_0203.00000060	Delta-aminolevulinic acid dehydratase	KO:K01698	14
TCCM_0376.00000430	Flavin containing amine oxidoreductase.		14
TCCM_0065.00000050	RNA-binding proteins (RRM domain)		14
TCCM_0016.00000030	Caspase domain.		14
TCCM_0302.00000060	Membrane protease subunits, stomatin/prohibitin homologs		14
TCCM_0376.00000020	Putative Zn-dependent protease, contains TPR repeats		14
TCCM_0462.00000040	ribosomal protein S18	KO:K02963	14
TCCM_0384.00000010	Phosphomannomutase	KO:K01835	14
TCCM_0609.00000190			14
TCCM_0013.00000060	light-dependent protochlorophyllide reductase	KO:K00218	14
TCCM_0573.00000010	Indole-3-glycerol phosphate synthase	KO:K01609	14
TCCM_0858.00000450			14
TCCM_0122.00000370	dihydrodipicolinate reductase	KO:K00215	14
TCCM_0160.00000030	Peptidyl-prolyl cis-trans isomerase (rotamase) - cyclophilin family		14
TCCM_0130.00000040			14
TCCM_0986.00000180	Dehydrogenases with different specificities (related to short-chain alcohol dehydrogenases)		14
TCCM_0498.00000390	Selenocysteine lyase	KO:K11325	14
TCCM_0506.00000100	magnesium chelatase, H subunit	KO:K03403	14
TCCM_0090.00000050			14
TCCM_0294.00000240	geranylgeranyl reductase family		14
TCCM_0379.00000030	ATPases involved in chromosome partitioning	KO:K03593	14
TCCM_0952.00000030	cobyric acid synthase CobQ	KO:K02232	14
TCCM_0728.00000050	Uncharacterized protein conserved in bacteria	KO:K02040	14
TCCM_0302.00000050			14
TCCM_0478.00000040	Peroxiredoxin		14
TCCM_0325.00000200	7,8-dihydro-6-hydroxymethylpterin-pyrophosphokinase	KO:K00950	14
TCCM_0141.00000280			14
TCCM_0310.00000190			14
TCCM_0470.00000220	Uncharacterized protein conserved in bacteria		14
TCCM_0018.00000080	phosphate ABC transporter, permease protein PstA	KO:K02038	14
TCCM_0188.00001450			14
TCCM_0240.00000040	ATP synthase, F1 delta subunit	KO:K02113	13
TCCM_0924.00000010	Cna protein B-type domain.		13
TCCM_0877.00000020	ABC-type Fe3+ transport system, periplasmic component	KO:K02012	13
TCCM_0240.00000050	ATP synthase, F0 subunit b	KO:K02109	13
TCCM_0570.00000130	ABC-type amino acid transport/signal transduction systems, periplasmic component/domain	KO:K09969	13
TCCM_0689.00000030	Alpha-glucosidases, family 31 of glycosyl hydrolases	KO:K01187	13
TCCM_0016.00000040	ATP sulphurylase	KO:K00958	13
TCCM_0849.00000010	ferredoxin-sulfite reductase	KO:K00392	13
TCCM_0313.00000020	DNA-directed RNA polymerase, beta'''' subunit	KO:K03046	13
TCCM_0158.00000190	daunorubicin resistance ABC transporter ATP-binding subunit	KO:K09687	13
TCCM_0591.00000010	ATP phosphoribosyltransferase, regulatory subunit	KO:K01892	13
TCCM_0430.00000020	Aspartate-semialdehyde dehydrogenase	KO:K00133	13
TCCM_0660.00000020	translation elongation factor P	KO:K02356	13
TCCM_0675.00000020	Uncharacterized conserved protein		13
TCCM_0355.00000010	urea ABC transporter, urea binding protein	KO:K11959	13
TCCM_0098.00000030	Serine phosphatase RsbU, regulator of sigma subunit		13
TCCM_0380.00000140	GTP-binding protein YchF	KO:K06942	13
TCCM_0675.00000010	Response regulator containing a CheY-like receiver domain and an HTH DNA-binding domain		13
TCCM_0447.00001740			13
TCCM_0160.00000220	S-methyl-5-thioribose-1-phosphate isomerase	KO:K08963	13
TCCM_0089.00000220	Signal transduction histidine kinase regulating C4-dicarboxylate transport system		13
TCCM_0594.00000030	alanine dehydrogenase	KO:K00259	13
TCCM_0251.00000040	FeS assembly protein SufB	KO:K09014	13
TCCM_0004.00000030	succinate dehydrogenase or fumarate reductase, flavoprotein subunitGram-negative/mitochondrial subgroup	KO:K00239	13
TCCM_0145.00000290	probable nitrogen fixation protein		13
TCCM_0394.00000010	Prefoldin, chaperonin cofactor		13
TCCM_0078.00000030			13
TCCM_0369.00000060	protein-export membrane protein, SecD/SecF family/protein-export membrane protein SecD	KO:K03072	13
TCCM_0110.00000230			13
TCCM_0566.00000020	ATP-dependent DNA helicase PcrA	KO:K03657	13
TCCM_0493.00000010	chaperone protein DnaK	KO:K04043	13
TCCM_0078.00000040	N-acetylglutamate synthase (N-acetylornithine aminotransferase)	KO:K00620	13
TCCM_0144.00000020	Isocitrate dehydrogenases	KO:K00031	13
TCCM_0282.00000150	Tetratricopeptide repeat.		13
TCCM_0049.00000040	Adenylate cyclase, family 3 (some proteins contain HAMP domain)	KO:K01768	13
TCCM_0209.00000020	Uncharacterized low-complexity proteins		13
TCCM_0501.00000030			13
TCCM_0173.00000060			13
TCCM_0171.00000010	ATPase, P-type (transporting), HAD superfamily, subfamily IC/ATPase, P-type (transporting), HAD superfamily, subfamily IC/ATPase, P-type (transporting), HAD superfamily, subfamily IC	KO:K01537	13
TCCM_0409.00000050	Dienelactone hydrolase and related enzymes	KO:K01061	13
TCCM_0229.00000170	Heterodisulfide reductase, subunit B	KO:K00241	13
TCCM_0174.00000150			13
TCCM_0790.00000070	Acyl-CoA synthetases (AMP-forming)/AMP-acid ligases II		13
TCCM_0768.00000030			13
TCCM_0334.00000020			13
TCCM_0506.00000030	glycogen debranching enzyme, archaeal type, putative		13
TCCM_0471.00000150	Lignostilbene-alpha,beta-dioxygenase and related enzymes	KO:K00464	13
TCCM_0794.00000030	Beta-glucosidase-related glycosidases	KO:K01207	13
TCCM_0881.00000020			13
TCCM_0969.00000020	Putative GTPases (G3E family)		13
TCCM_0942.00000080	ABC-type multidrug transport system, ATPase component	KO:K09687	13
TCCM_0052.00000250	Uncharacterized conserved protein		13
TCCM_0176.00000040	cysteine desulfurases, SufS subfamily	KO:K11717	13
TCCM_0237.00000640	Translation elongation factor Ts		13
TCCM_0178.00000160	putative toxin-antitoxin system antitoxin component, TIGR02293 family		13
TCCM_0033.00000050			13
TCCM_0154.00000060			13
TCCM_0031.00000270			13
TCCM_0347.00000030	Methylase involved in ubiquinone/menaquinone biosynthesis		13
TCCM_0985.00000780	S-layer homology domain.		13
TCCM_0240.00000040	ATP synthase, F1 delta subunit	KO:K02113	13
TCCM_0924.00000010	Cna protein B-type domain.		13
TCCM_0877.00000020	ABC-type Fe3+ transport system, periplasmic component	KO:K02012	13
TCCM_0240.00000050	ATP synthase, F0 subunit b	KO:K02109	13
TCCM_0570.00000130	ABC-type amino acid transport/signal transduction systems, periplasmic component/domain	KO:K09969	13
TCCM_0689.00000030	Alpha-glucosidases, family 31 of glycosyl hydrolases	KO:K01187	13
TCCM_0016.00000040	ATP sulphurylase	KO:K00958	13
TCCM_0849.00000010	ferredoxin-sulfite reductase	KO:K00392	13
TCCM_0313.00000020	DNA-directed RNA polymerase, beta'''' subunit	KO:K03046	13
TCCM_0158.00000190	daunorubicin resistance ABC transporter ATP-binding subunit	KO:K09687	13
TCCM_0591.00000010	ATP phosphoribosyltransferase, regulatory subunit	KO:K01892	13
TCCM_0430.00000020	Aspartate-semialdehyde dehydrogenase	KO:K00133	13
TCCM_0660.00000020	translation elongation factor P	KO:K02356	13
TCCM_0675.00000020	Uncharacterized conserved protein		13
TCCM_0355.00000010	urea ABC transporter, urea binding protein	KO:K11959	13
TCCM_0098.00000030	Serine phosphatase RsbU, regulator of sigma subunit		13
TCCM_0380.00000140	GTP-binding protein YchF	KO:K06942	13
TCCM_0675.00000010	Response regulator containing a CheY-like receiver domain and an HTH DNA-binding domain		13
TCCM_0447.00001740			13
TCCM_0160.00000220	S-methyl-5-thioribose-1-phosphate isomerase	KO:K08963	13
TCCM_0089.00000220	Signal transduction histidine kinase regulating C4-dicarboxylate transport system		13
TCCM_0594.00000030	alanine dehydrogenase	KO:K00259	13
TCCM_0251.00000040	FeS assembly protein SufB	KO:K09014	13
TCCM_0004.00000030	succinate dehydrogenase or fumarate reductase, flavoprotein subunitGram-negative/mitochondrial subgroup	KO:K00239	13
TCCM_0145.00000290	probable nitrogen fixation protein		13
TCCM_0394.00000010	Prefoldin, chaperonin cofactor		13
TCCM_0078.00000030			13
TCCM_0369.00000060	protein-export membrane protein, SecD/SecF family/protein-export membrane protein SecD	KO:K03072	13
TCCM_0110.00000230			13
TCCM_0566.00000020	ATP-dependent DNA helicase PcrA	KO:K03657	13
TCCM_0493.00000010	chaperone protein DnaK	KO:K04043	13
TCCM_0078.00000040	N-acetylglutamate synthase (N-acetylornithine aminotransferase)	KO:K00620	13
TCCM_0144.00000020	Isocitrate dehydrogenases	KO:K00031	13
TCCM_0282.00000150	Tetratricopeptide repeat.		13
TCCM_0049.00000040	Adenylate cyclase, family 3 (some proteins contain HAMP domain)	KO:K01768	13
TCCM_0209.00000020	Uncharacterized low-complexity proteins		13
TCCM_0501.00000030			13
TCCM_0173.00000060			13
TCCM_0171.00000010	ATPase, P-type (transporting), HAD superfamily, subfamily IC/ATPase, P-type (transporting), HAD superfamily, subfamily IC/ATPase, P-type (transporting), HAD superfamily, subfamily IC	KO:K01537	13
TCCM_0409.00000050	Dienelactone hydrolase and related enzymes	KO:K01061	13
TCCM_0229.00000170	Heterodisulfide reductase, subunit B	KO:K00241	13
TCCM_0174.00000150			13
TCCM_0790.00000070	Acyl-CoA synthetases (AMP-forming)/AMP-acid ligases II		13
TCCM_0768.00000030			13
TCCM_0334.00000020			13
TCCM_0506.00000030	glycogen debranching enzyme, archaeal type, putative		13
TCCM_0471.00000150	Lignostilbene-alpha,beta-dioxygenase and related enzymes	KO:K00464	13
TCCM_0794.00000030	Beta-glucosidase-related glycosidases	KO:K01207	13
TCCM_0881.00000020			13
TCCM_0969.00000020	Putative GTPases (G3E family)		13
TCCM_0942.00000080	ABC-type multidrug transport system, ATPase component	KO:K09687	13
TCCM_0052.00000250	Uncharacterized conserved protein		13
TCCM_0176.00000040	cysteine desulfurases, SufS subfamily	KO:K11717	13
TCCM_0237.00000640	Translation elongation factor Ts		13
TCCM_0178.00000160	putative toxin-antitoxin system antitoxin component, TIGR02293 family		13
TCCM_0033.00000050			13
TCCM_0154.00000060			13
TCCM_0031.00000270			13
TCCM_0347.00000030	Methylase involved in ubiquinone/menaquinone biosynthesis		13
TCCM_0985.00000780	S-layer homology domain.		13
TCCM_1000.00000030	Chaperonin GroEL (HSP60 family)	KO:K04077	12
TCCM_0102.00001950			12
TCCM_0780.00000020			12
TCCM_0113.00000040			12
TCCM_0711.00000020	Predicted solute binding protein		12
TCCM_0453.00003720			12
TCCM_0462.00000520			12
TCCM_0154.00000020	50S ribosomal protein L11	KO:K02867	12
TCCM_0374.00000010	RNA-binding proteins (RRM domain)		12
TCCM_0494.00000050	ribosomal protein L6, bacterial type	KO:K02933	12
TCCM_0294.00000230	ribosome recycling factor	KO:K02838	12
TCCM_0991.00000030			12
TCCM_0800.00002130			12
TCCM_0018.00000090	phosphate ABC transporter, ATP-binding protein	KO:K02036	12
TCCM_0011.00000260	ATP synthase, F1 epsilon subunit (delta in mitochondria)	KO:K02114	12
TCCM_0529.00001370			12
TCCM_0706.00000070	Cyanophycinase and related exopeptidases		12
TCCM_0242.00000030	NADH-quinone oxidoreductase, B subunit	KO:K05582	12
TCCM_0045.00000070	Ribosomal protein S14	KO:K02954	12
TCCM_0848.00000030	ABC-type dipeptide transport system, periplasmic component	KO:K02035	12
TCCM_0048.00004470	Tetratricopeptide repeat.		12
TCCM_0597.00000020	probable nitrogen fixation protein FixT	KO:K02593	12
TCCM_0017.00000040	Protein chain release factor A	KO:K02835	12
TCCM_0390.00000020			12
TCCM_0908.00000020	Thioredoxin domain-containing protein	KO:K03671	12
TCCM_0276.00000220	ribonuclease III, bacterial	KO:K03685	12
TCCM_0074.00002160	Aspartate-semialdehyde dehydrogenase	KO:K00133	12
TCCM_0004.00000020	Micrococcal nuclease (thermonuclease) homologs		12
TCCM_0186.00000120	Tfp pilus assembly protein PilF		12
TCCM_0303.00000050	monothiol glutaredoxin, Grx4 family		12
TCCM_0161.00000020	Parvulin-like peptidyl-prolyl isomerase		12
TCCM_0524.00000010	ADP-heptose synthase, bifunctional sugar kinase/adenylyltransferase		12
TCCM_0992.00000020	Large extracellular alpha-helical protein	KO:K06894	12
TCCM_0634.00000030	CpeS-like protein.		12
TCCM_0532.00000160	Glutamyl- and glutaminyl-tRNA synthetases	KO:K01885	12
TCCM_0885.00000140	Uncharacterized conserved protein		12
TCCM_0705.00006070			12
TCCM_0231.00000010	Predicted phosphatase	KO:K07093	12
TCCM_0426.00000020	Uncharacterized low-complexity proteins		12
TCCM_0676.00000010	radical SAM-linked protein/radical SAM family uncharacterized protein		12
TCCM_0309.00000280	Large extracellular alpha-helical protein	KO:K06894	12
TCCM_0146.00000050	Uncharacterized conserved protein		12
TCCM_0200.00000290			12
TCCM_0024.00001630			12
TCCM_0299.00000010	Spermidine/putrescine-binding periplasmic protein	KO:K11069	12
TCCM_0293.00000010	Translation initiation factor 1 (eIF-1/SUI1) and related proteins	KO:K03113	12
TCCM_0242.00000010	Cna protein B-type domain.		10
TCCM_0486.00000020	Bacterial surface proteins containing Ig-like domains		10
TCCM_0450.00000040	arsenite-activated ATPase ArsA/arsenite-activated ATPase ArsA	KO:K01551	10
TCCM_0302.00000040	Putative peptidoglycan-binding domain-containing protein	KO:K01185	10
TCCM_0058.00000260	Predicted hydrolases or acyltransferases (alpha/beta hydrolase superfamily)		10
TCCM_0173.00000190	glycine cleavage system T protein	KO:K00605	10
TCCM_0054.00000050	phytoene desaturase	KO:K02293	10
TCCM_0942.00000010	Uncharacterized conserved protein		10
TCCM_0494.00000220	Dienelactone hydrolase and related enzymes	KO:K01061	10
TCCM_0575.00000040	Predicted Zn-dependent peptidases	KO:K01412	10
TCCM_0288.00000020	ABC-type metal ion transport system, periplasmic component/surface adhesin	KO:K02077	10
TCCM_0003.00000250	Mannosyl oligosaccharide glucosidase.		10
TCCM_0578.00000030	protoporphyrinogen oxidase	KO:K00231	10
TCCM_0929.00000020	ABC-type dipeptide transport system, periplasmic component	KO:K02035	10
TCCM_0503.00000110	Outer membrane protein/protective antigen OMA87	KO:K07277	10
TCCM_0762.00000230	Predicted oxidoreductases (related to aryl-alcohol dehydrogenases)		10
TCCM_0190.00000030	chlorophyll a/b binding light-harvesting protein	KO:K02705	10
TCCM_0078.00000490	Universal stress protein UspA and related nucleotide-binding proteins		10
TCCM_0951.00000010	squalene-hopene cyclase	KO:K06045	10
TCCM_0056.00000010			10
TCCM_0271.00000020	PEP phosphonomutase and related enzymes	KO:K03417	10
TCCM_0063.00000050	6,7-dimethyl-8-ribityllumazine synthase	KO:K00794	10
TCCM_0161.00000870	Polyketide synthase modules and related proteins		10
TCCM_0217.00000190	Uncharacterized protein conserved in bacteria		10
TCCM_0251.00000060			10
TCCM_0847.00000020			10
TCCM_0964.00000100	molybdenum cofactor synthesis domain	KO:K03638	10
TCCM_0266.00000660	cAMP-binding proteins - catabolite gene activator and regulatory subunit of cAMP-dependent protein kinases		10
TCCM_0159.00000030	Predicted phosphatases		10
TCCM_0427.00000020		KO:K06338	10
TCCM_0406.00000190	Predicted unusual protein kinase		10
TCCM_0595.00000110	Nucleoside-diphosphate-sugar epimerases		10
TCCM_0767.00000140	Nucleoside-diphosphate-sugar epimerases	KO:K01784	10
TCCM_0273.00000050			10
TCCM_0719.00000190			10
TCCM_0109.00000240	Flp pilus assembly protein TadD, contains TPR repeats		10
TCCM_0154.00000320	RbcX protein.		10
TCCM_0997.00000180	Glutamate dehydrogenase/leucine dehydrogenase		10
TCCM_0541.00000190	Phospholipase/lecithinase/hemolysin		10
TCCM_0813.00000010	HAD superfamily (subfamily IIIA) phosphatase, TIGR01668	KO:K07015	10
TCCM_0084.00000010	Predicted pyridoxal phosphate-dependent enzyme apparently involved in regulation of cell wall biogenesis		10
TCCM_0065.00000040	MoxR-like ATPases	KO:K03924	10
TCCM_0545.00000010	glutamate 5-kinase	KO:K00931	10
TCCM_0199.00000210	Phosphoribosylformylglycinamidine (FGAM) synthase, synthetase domain	KO:K01952	10
TCCM_0875.00000010			10
TCCM_0715.00000020	tRNA modification GTPase TrmE	KO:K03650	10
TCCM_0749.00000020	Exopolyphosphatase	KO:K01514	10
TCCM_0097.00000010	glutamine synthetase, type I	KO:K01915	9
TCCM_0562.00000010	Carbohydrate-selective porin, OprB family./S-layer homology domain.		9
TCCM_0208.00000030	Glucose-6-phosphate isomerase	KO:K01810	9
TCCM_0342.00000020	glucose-6-phosphate 1-dehydrogenase	KO:K00036	9
TCCM_0555.00000020	ATP-dependent metalloprotease FtsH	KO:K03798	9
TCCM_0952.00000010	Peroxiredoxin	KO:K03564	9
TCCM_0589.00000140			9
TCCM_0914.00000150	protein RecA	KO:K03553	9
TCCM_0404.00000140			9
TCCM_0142.00000260			9
TCCM_0118.00000020	signal peptide peptidase SppA, 36K type	KO:K04773	9
TCCM_0385.00000020	Dipeptidyl aminopeptidases/acylaminoacyl-peptidases		9
TCCM_0067.00000030	ATPases with chaperone activity, ATP-binding subunit	KO:K03696	9
TCCM_0006.00000080			9
TCCM_0025.00000040			9
TCCM_0178.00000130	Uncharacterized conserved protein		9
TCCM_0422.00000420			9
TCCM_0753.00000010			9
TCCM_0410.00000030	NADPH:quinone reductase and related Zn-dependent oxidoreductases	KO:K00344	9
TCCM_0597.00000010	NifZ domain.	KO:K02597	9
TCCM_0003.00003580	Gas vesicle synthesis protein GvpL/GvpF.		9
TCCM_0024.00000030	Glutamate synthase domain 1	KO:K00284	9
TCCM_0012.00000030	arginine decarboxylase, biosynthetic	KO:K01585	9
TCCM_0532.00000020	Serine/threonine protein kinase		9
TCCM_0880.00000040	ABC-type uncharacterized transport system involved in gliding motility, auxiliary component		9
TCCM_0068.00000030	ribonuclease Z	KO:K00784	9
TCCM_0181.00000060			9
TCCM_0476.00002180	Phycobilisome protein.	KO:K02285	9
TCCM_0093.00000030	FOG: HEAT repeat		9
TCCM_0305.00002870	ribosomal protein S20	KO:K02968	9
TCCM_0302.00000190	Uncharacterized protein conserved in bacteria		9
TCCM_0185.00000310	Serine/threonine protein kinase	KO:K00908	9
TCCM_0287.00000030	Uncharacterized conserved protein		9
TCCM_0176.00000290	Pyruvate/2-oxoglutarate dehydrogenase complex, dihydrolipoamide dehydrogenase (E3) component, and related enzymes	KO:K00520	9
TCCM_0153.00000010			9
TCCM_0772.00000010	Uncharacterized conserved protein		9
TCCM_0536.00000030	haloacid dehalogenase superfamily, subfamily IA hydrolase, TIGR01548	KO:K11777	9
TCCM_0106.00000230	Dehydrogenases (flavoproteins)		9
TCCM_0318.00000020	transcriptional regulator NrdR	KO:K07738	9
TCCM_0051.00000020		KO:K00799	9
TCCM_0143.00005360			9
TCCM_0226.00000040			9
TCCM_0395.00003190	Pyruvate/2-oxoglutarate dehydrogenase complex, dihydrolipoamide dehydrogenase (E3) component, and related enzymes	KO:K00383	9
TCCM_0502.00000220	Polyketide cyclase / dehydrase and lipid transport.		9
TCCM_0671.00000140			9
TCCM_0630.00000260	Predicted transcriptional regulators		9
TCCM_0453.00000190			9
TCCM_0521.00000020	Predicted oxidoreductases of the aldo/keto reductase family	KO:K07079	9
TCCM_0705.00000230	Superfamily II RNA helicase		9
TCCM_0551.00005570	Delta-aminolevulinic acid dehydratase	KO:K01698	9
TCCM_0331.00000300	Predicted site-specific integrase-resolvase		9
TCCM_0025.00000240			9
TCCM_0882.00000030		KO:K02663	9
TCCM_0067.00000060	Phytoene/squalene synthetase	KO:K00801	9
TCCM_0006.00000090	4-hydroxyphenylpyruvate dioxygenase	KO:K00457	9
TCCM_0123.00000810	Tetratricopeptide repeat.		9
TCCM_0295.00000730			9
TCCM_0305.00000030	thiamine biosynthesis protein ThiS	KO:K03154	9
TCCM_0381.00000020	Trypsin-like serine proteases, typically periplasmic, contain C-terminal PDZ domain		9
TCCM_0600.00000030	Transcription-repair coupling factor (superfamily II helicase)	KO:K03723	9
TCCM_0869.00002270		KO:K01515	9
TCCM_0993.00000200			9
TCCM_0074.00000040			9
TCCM_0726.00000030	phenazine biosynthesis protein PhzF family	KO:K06998	9
TCCM_0771.00002050	Domain of Unknown Function (DUF928).		9
TCCM_0872.00000130	CpeT/CpcT family (DUF1001).		9
TCCM_0525.00000250			9
TCCM_0349.00000020	Glycerol dehydrogenase and related enzymes	KO:K00005	9
TCCM_0074.00000130	Predicted transcriptional regulator containing the HTH domain	KO:K06024	9
TCCM_0247.00000040	Pyrroloquinoline quinone (Coenzyme PQQ) biosynthesis protein C	KO:K06137	9
TCCM_0851.00000010	polyribonucleotide nucleotidyltransferase	KO:K00962	8
TCCM_0780.00000030			8
TCCM_0747.00000030	Predicted O-methyltransferase	KO:K00588	8
TCCM_0082.00000230	Tetratricopeptide repeat.		8
TCCM_0219.00000010	translation initiation factor IF-2	KO:K02519	8
TCCM_0272.00000320	photosystem II protein PsbQ		8
TCCM_0962.00000320	Glyceraldehyde-3-phosphate dehydrogenase/erythrose-4-phosphate dehydrogenase	KO:K00150	8
TCCM_0553.00000140			8
TCCM_0488.00000040	asparaginyl-tRNA synthetase	KO:K01893	8
TCCM_0026.00000290	ribonuclease, Rne/Rng family	KO:K08300	8
TCCM_0621.00000010	aconitate hydratase 2	KO:K01682	8
TCCM_0436.00000050	NAD-dependent aldehyde dehydrogenases	KO:K00135	8
TCCM_0586.00000010	Sugar kinases, ribokinase family		8
TCCM_0518.00000030	ribosomal protein S3, bacterial type	KO:K02982	8
TCCM_0244.00000130	Inorganic pyrophosphatase	KO:K01507	8
TCCM_0098.00000010	NADH:ubiquinone oxidoreductase 49 kD subunit 7	KO:K05579	8
TCCM_0315.00000010	cyanophycin synthetase	KO:K03802	8
TCCM_0534.00000170	Glutamate-1-semialdehyde aminotransferase	KO:K01845	8
TCCM_0320.00000020	Aminopeptidase N	KO:K01256	8
TCCM_0082.00000040	Predicted nucleoside-diphosphate-sugar epimerases		8
TCCM_0959.00000070	methyltransferase, FkbM family		8
TCCM_0627.00000220	Dehydrogenases with different specificities (related to short-chain alcohol dehydrogenases)	KO:K00059	8
TCCM_0438.00000020	Putative GTPases (G3E family)		8
TCCM_0161.00000260	F0F1-type ATP synthase, subunit a	KO:K02108	8
TCCM_0518.00000020	ribosomal protein L16, bacterial/organelle	KO:K02878	8
TCCM_0251.00000030	FeS assembly ATPase SufC	KO:K09013	8
TCCM_0656.00000100			8
TCCM_0108.00000160	transcription termination factor NusA	KO:K02600	8
TCCM_0823.00000360	Predicted oxidoreductases (related to aryl-alcohol dehydrogenases)	KO:K05885	8
TCCM_0278.00000030	acetolactate synthase, small subunit		8
TCCM_0357.00000030	anthranilate phosphoribosyltransferase	KO:K00766	8
TCCM_0265.00000050	phosphate/phosphite/phosphonate ABC transporters, periplasmic binding protein	KO:K02044	8
TCCM_0249.00000020	porphobilinogen deaminase	KO:K01749	8
TCCM_0267.00000040	UDP-N-acetylmuramoylalanine--D-glutamate ligase	KO:K01925	8
TCCM_0809.00000080			8
TCCM_0372.00000030	Glycosyltransferase		8
TCCM_0709.00000570	Translation elongation factors (GTPases)	KO:K02355	8
TCCM_0743.00000050	tyrosyl-tRNA synthetase	KO:K01866	8
TCCM_0107.00000030	amino acid adenylation domain		8
TCCM_0214.00000020	Manganese-stabilising protein / photosystem II polypeptide.	KO:K02716	8
TCCM_0109.00000010	Nitroreductase		8
TCCM_0191.00000010	proton-translocating NADH-quinone oxidoreductase, chain L	KO:K00341	8
TCCM_0139.00000440	adenylylsulfate kinase (apsK)	KO:K00860	8
TCCM_0039.00000030	Serine/threonine protein phosphatase	KO:K01090	8
TCCM_0482.00000050			8
TCCM_0126.00000040	ABC-type bacteriocin/lantibiotic exporters, contain an N-terminal double-glycine peptidase domain	KO:K06147	8
TCCM_0497.00000020			8
TCCM_0001.00000100	tryptophan synthase, alpha subunit	KO:K01695	8
TCCM_0685.00000240	methionine-S-sulfoxide reductase	KO:K07304	8
TCCM_0814.00000010	Actin-like ATPase involved in cell division		8
TCCM_0150.00000160	beta-ketoacyl-acyl-carrier-protein synthase II	KO:K09458	8
TCCM_0156.00000020	fatty acid/phospholipid synthesis protein PlsX	KO:K03621	8
TCCM_0975.00000100	Glycyl-tRNA synthetase, beta subunit	KO:K01879	8
TCCM_0018.00000350	Universal stress protein UspA and related nucleotide-binding proteins		8
TCCM_0792.00001920	phosphate/phosphite/phosphonate ABC transporters, periplasmic binding protein	KO:K02044	8
TCCM_0620.00000030	phosphoribosylaminoimidazole-succinocarboxamide synthase	KO:K01923	8
TCCM_0327.00000180			8
TCCM_0043.00000050	D-alanine--D-alanine ligase	KO:K01921	8
TCCM_0824.00000270	Chlorophyll A-B binding protein.		8
TCCM_0696.00000250	Dehydrogenases with different specificities (related to short-chain alcohol dehydrogenases)		8
TCCM_0895.00000210	Malic enzyme	KO:K00027	8
TCCM_0688.00000030			8
TCCM_0341.00000010	Thiamine biosynthesis protein ThiC	KO:K03147	8
TCCM_0556.00001040	Polyketide synthase modules and related proteins		8
TCCM_0248.00000010	Ycf4.		8
TCCM_0107.00000110			8
TCCM_0560.00000120	Putative Zn-dependent protease, contains TPR repeats		8
TCCM_0012.00000230	phosphoribosylaminoimidazole carboxylase, PurE protein	KO:K01588	8
TCCM_0252.00000130	Metal-dependent hydrolase involved in phosphonate metabolism	KO:K06162	8
TCCM_0381.00000260	Membrane GTPase LepA	KO:K03596	8
TCCM_0809.00000020	NAD+ synthetase	KO:K01916	8
TCCM_0647.00000180	Uncharacterized protein, putative amidase	KO:K01470	8
TCCM_0396.00000080			8
TCCM_0991.00000020	shikimate 5-dehydrogenase	KO:K00014	8
TCCM_0594.00000010	UDP-N-acetylglucosamine 1-carboxyvinyltransferase	KO:K00790	8
TCCM_0040.00000040	haloacid dehalogenase superfamily, subfamily IA, variant 1 with third motif having Dx(3-4)D or Dx(3-4)E/REG-2-like, HAD superfamily (subfamily IA) hydrolase	KO:K07025	8
TCCM_0207.00000270			8
TCCM_0287.00000430	Threonine synthase	KO:K01733	8
TCCM_0149.00000010	Phosphoribosylformylglycinamidine (FGAM) synthase, synthetase domain	KO:K01952	8
TCCM_0249.00000050	Cytochrome c, mono- and diheme variants	KO:K08906	8
TCCM_0256.00001510			8
TCCM_0797.00000210	Phycobilisome protein.	KO:K02092	7
TCCM_0154.00000330	Ribulose bisphosphate carboxylase small subunit	KO:K01602	7
TCCM_0040.00000020	Sulfite reductase, alpha subunit (flavoprotein)	KO:K02641	7
TCCM_0009.00000360			7
TCCM_0792.00000020	4-alpha-glucanotransferase	KO:K00705	7
TCCM_0342.00000030	opcA protein		7
TCCM_0044.00000030	ATPases of the AAA+ class	KO:K13525	7
TCCM_0473.00000020	Pyruvate/2-oxoglutarate dehydrogenase complex, dehydrogenase (E1) component, eukaryotic type, beta subunit	KO:K00162	7
TCCM_0454.00000010	ribosomal protein S4, bacterial/organelle type	KO:K02986	7
TCCM_0017.00000120	DNA-directed RNA polymerase, alpha subunit, bacterial and chloroplast-type	KO:K03040	7
TCCM_0450.00000020	gas vesicle protein GvpN		7
TCCM_0150.00000010	pyruvate dehydrogenase E1 component, alpha subunit	KO:K00161	7
TCCM_0550.00000130	Rieske Fe-S protein	KO:K02636	7
TCCM_0017.00000060	Ribosomal protein S9	KO:K02996	7
TCCM_0116.00000020	Uncharacterized protein related to plant photosystem II stability/assembly factor		7
TCCM_0575.00000030	Predicted Zn-dependent peptidases		7
TCCM_0470.00000140			7
TCCM_0281.00000210	NAD dependent epimerase/dehydratase family.		7
TCCM_0405.00000120	ABC-type amino acid transport/signal transduction systems, periplasmic component/domain	KO:K02030	7
TCCM_0699.00000010	Predicted nucleoside-diphosphate-sugar epimerases		7
TCCM_0407.00000500	Asp-tRNAAsn/Glu-tRNAGln amidotransferase A subunit and related amidases	KO:K02433	7
TCCM_0530.00000210	triosephosphate isomerase	KO:K01803	7
TCCM_0747.00000040	3-dehydroquinate synthetase	KO:K01735	7
TCCM_0282.00000030	Growth inhibitor	KO:K07171	7
TCCM_0235.00000200	Adenylate kinase and related kinases	KO:K00939	7
TCCM_0167.00003800	Glucan phosphorylase	KO:K00688	7
TCCM_0857.00000080	Acetyltransferases		7
TCCM_0274.00000030	Alanine-alpha-ketoisovalerate (or valine-pyruvate) aminotransferase	KO:K00835	7
TCCM_0883.00000020	glucose-1-phosphate thymidylylransferase, long form	KO:K00973	7
TCCM_0777.00000030	transcription antitermination factor NusB	KO:K03625	7
TCCM_0050.00000450	Nitrogen fixation protein NifW.	KO:K02595	7
TCCM_0076.00000240	Predicted Zn-dependent hydrolases of the beta-lactamase fold		7
TCCM_0135.00000210	Uncharacterized protein conserved in cyanobacteria		7
TCCM_0236.00000050	flavodoxin, long chain	KO:K03839	7
TCCM_0641.00000130		KO:K03469	7
TCCM_0291.00000180	solanesyl diphosphate synthase	KO:K00805	7
TCCM_0167.00000170	Lipase (class 3).		7
TCCM_0307.00000360	ferrochelatase	KO:K01772	7
TCCM_0059.00000030			7
TCCM_0839.00000010	CpeT/CpcT family (DUF1001).	KO:K05383	7
TCCM_0710.00000010	Ribulose bisphosphate carboxylase small subunit	KO:K01602	7
TCCM_0151.00000150	Iron-sulfur cluster assembly accessory protein		7
TCCM_0862.00000040	Phosphoribosyl-AMP cyclohydrolase	KO:K01496	7
TCCM_0225.00000250	septum site-determining protein MinD	KO:K03609	7
TCCM_0102.00000300			7
TCCM_0436.00000060	NAD-dependent aldehyde dehydrogenases	KO:K00135	7
TCCM_0666.00000140	aspartyl-tRNA synthetase, bacterial type	KO:K01876	7
TCCM_0896.00000020			7
TCCM_0367.00000010	glucosamine--fructose-6-phosphate aminotransferase (isomerizing)	KO:K00820	7
TCCM_0339.00000140	methionyl-tRNA formyltransferase	KO:K00604	7
TCCM_0311.00000160	Predicted amidohydrolase		7
TCCM_0357.00000200	Uncharacterized protein conserved in bacteria		7
TCCM_0473.00000080	UDP-N-acetylglucosamine 2-epimerase	KO:K01791	7
TCCM_0080.00000040			7
TCCM_0757.00000050	ferrochelatase	KO:K01772	7
TCCM_0422.00000130			7
TCCM_0836.00000020	Thiol:disulfide interchange protein		7
TCCM_0236.00000330	Predicted NTPase (NACHT family)		7
TCCM_0456.00000010	glutamyl-tRNA reductase	KO:K02492	7
TCCM_0832.00000200	FAD/FMN-containing dehydrogenases		7
TCCM_0273.00000230	Hydrogenase maturation factor	KO:K04656	7
TCCM_0718.00000030	Uncharacterized ABC-type transport system, periplasmic component/surface lipoprotein	KO:K07335	7
TCCM_0768.00000100	ATP-dependent Zn proteases	KO:K03798	7
TCCM_0023.00000040	adenylylsulfate kinase (apsK)	KO:K00860	7
TCCM_0360.00000040			7
TCCM_0996.00000010	Serine/threonine protein phosphatase	KO:K01090	7
TCCM_0373.00000230	Excinuclease ATPase subunit	KO:K03701	7
TCCM_0892.00000010	Predicted N6-adenine-specific DNA methylase	KO:K07444	7
TCCM_0829.00000070	Predicted oxidoreductases (related to aryl-alcohol dehydrogenases)		7
TCCM_0117.00004760	Glucose-6-P dehydrogenase subunit		7
TCCM_0556.00001000			7
TCCM_0444.00000310	Predicted hydrolases or acyltransferases (alpha/beta hydrolase superfamily)	KO:K01561	7
TCCM_0096.00005620	Response regulator containing a CheY-like receiver domain and a GGDEF domain	KO:K02488	7
TCCM_0540.00000350	anti-anti-sigma factor	KO:K04749	7
TCCM_0161.00000250	ATP synthase, F0 subunit c	KO:K02110	7
TCCM_0662.00000020	Phycobilisome protein.	KO:K05376	6
TCCM_0011.00000280	F0F1-type ATP synthase, beta subunit	KO:K02112	6
TCCM_0313.00000100			6
TCCM_0077.00003280	Polyketide synthase modules and related proteins		6
TCCM_0222.00000010		KO:K00540	6
TCCM_0487.00000220	NADH dehydrogenase, FAD-containing subunit	KO:K03885	6
TCCM_0211.00000770	Preprotein translocase subunit SecA (ATPase, RNA helicase)	KO:K03070	6
TCCM_0023.00000050	Protein involved in biosynthesis of mitomycin antibiotics/polyketide fumonisin		6
TCCM_0770.00000010	Methylase involved in ubiquinone/menaquinone biosynthesis		6
TCCM_0383.00000010	Methyl-accepting chemotaxis protein		6
TCCM_0352.00000120			6
TCCM_0194.00000350	Predicted PP-loop superfamily ATPase	KO:K06920	6
TCCM_0255.00000250	Predicted NTPase (NACHT family)		6
TCCM_0823.00000150	glutamine amidotransferase of anthranilate synthase or aminodeoxychorismate synthase	KO:K01658	6
TCCM_0387.00000030	Pyruvate/2-oxoglutarate dehydrogenase complex, dihydrolipoamide dehydrogenase (E3) component, and related enzymes	KO:K00382	6
TCCM_0088.00000240			6
TCCM_0372.00000180			6
TCCM_0437.00000010	Nucleoside-diphosphate-sugar epimerases	KO:K01710	5
TCCM_0099.00000020	nitrogen fixation protein NifX	KO:K02596	5
TCCM_0444.00000150	Uncharacterized conserved protein		5
TCCM_0104.00000040	Uncharacterized protein conserved in archaea		5
TCCM_0106.00000010			5
TCCM_0046.00000770			5
TCCM_0978.00000010	Succinylglutamate desuccinylase	KO:K01437	5
TCCM_0111.00000040			5
TCCM_0987.00000840	Trypsin-like serine proteases, typically periplasmic, contain C-terminal PDZ domain		5
TCCM_0845.00000150	Uncharacterized conserved protein		5
TCCM_0003.00000020	ABC-type nitrate/sulfonate/bicarbonate transport system, ATPase component	KO:K02049	5
TCCM_0117.00000050	KWG Leptospira.		5
TCCM_0205.00000020	Type II secretory pathway, ATPase PulE/Tfp pilus assembly pathway, ATPase PilB	KO:K02652	5
TCCM_0454.00000190	NADH:ubiquinone oxidoreductase subunit 1 (chain H)	KO:K05572	5
TCCM_0009.00000320	Acyl-CoA synthetases (AMP-forming)/AMP-acid ligases II		5
TCCM_0878.00000010	Predicted carbamoyl transferase, NodU family	KO:K00612	5
TCCM_0346.00000190	Thioredoxin-like proteins and domains	KO:K07400	5
TCCM_0762.00000180	Glutamate synthase domain 3	KO:K00284	5
TCCM_0346.00000200	NifU homolog involved in Fe-S cluster formation	KO:K07400	5
TCCM_0626.00000160	Ribosomal protein S4 and related proteins	KO:K02986	5
TCCM_0581.00000020	Predicted NTPase (NACHT family)		5
TCCM_0012.00000240	ammonium transporter		5
TCCM_0284.00000070	Uncharacterized conserved protein		5
TCCM_0803.00000170			5
TCCM_0381.00000010	2-isopropylmalate synthase/homocitrate synthase family protein	KO:K01649	5
TCCM_0012.00000050			5
TCCM_0494.00000010	Preprotein translocase subunit SecY	KO:K03076	5
TCCM_0913.00005200		KO:K00765	5
TCCM_0073.00001460	ABC-type phosphate/phosphonate transport system, periplasmic component	KO:K02044	5
TCCM_0682.00000420	Dehydrogenases with different specificities (related to short-chain alcohol dehydrogenases)	KO:K00059	5
TCCM_0760.00000010	ATPase components of ABC transporters with duplicated ATPase domains	KO:K06158	5
TCCM_0772.00000040	argininosuccinate lyase	KO:K01755	5
TCCM_0149.00001390	Phycobilisome Linker polypeptide.	KO:K05379	5
TCCM_0057.00000050			5
TCCM_0934.00001120	Dehydrogenases (flavoproteins)		5
TCCM_0034.00000310	Fe2+/Zn2+ uptake regulation proteins	KO:K03711	5
TCCM_0731.00002300			5
TCCM_0612.00000610	Methylase involved in ubiquinone/menaquinone biosynthesis		5
TCCM_0448.00000160	MoxR-like ATPases		5
TCCM_0068.00000220	lipoate synthase	KO:K03644	5
TCCM_0994.00005630	Polyketide synthase modules and related proteins		5
TCCM_0560.00000070			5
TCCM_0124.00000640		KO:K09457	5
TCCM_0697.00004370	Predicted Fe-S oxidoreductases	KO:K02585	5
TCCM_0130.00000020	ABC-type polysaccharide/polyol phosphate transport system, ATPase component	KO:K09691	5
TCCM_0099.00000350	Preprotein translocase subunit SecD	KO:K03072	5
TCCM_0103.00000020	Uncharacterized protein required for cytochrome oxidase assembly	KO:K02259	5
TCCM_0205.00000050	Type II secretory pathway, component PulF	KO:K02653	5
TCCM_0367.00000140	Excinuclease ATPase subunit	KO:K03701	5
TCCM_0984.00001270			5
TCCM_0180.00000680	Acetyltransferases		5
TCCM_0424.00000290			5
TCCM_0589.00000020			4
TCCM_0582.00000060	Type II secretory pathway, component HofQ	KO:K02666	4
TCCM_0069.00005590	Type IIA topoisomerase (DNA gyrase/topo II, topoisomerase IV), A subunit	KO:K02469	4
TCCM_0728.00000010	Chemotaxis protein histidine kinase and related kinases		4
TCCM_0167.00005840	Peroxiredoxin	KO:K03564	4
TCCM_0377.00000010	ABC-type spermidine/putrescine transport systems, ATPase components	KO:K02010	4
TCCM_0615.00000020			4
TCCM_0290.00000010	Polyketide synthase modules and related proteins		4
TCCM_0418.00000040	Dihydroorotate dehydrogenase	KO:K00226	4
TCCM_0646.00000080	Histidinol dehydrogenase	KO:K00013	4
TCCM_0011.00000250			4
TCCM_0002.00000070	Ferredoxin-thioredoxin reductase, catalytic subunit	KO:K00535	4
TCCM_0051.00000350	Aspartate/tyrosine/aromatic aminotransferase	KO:K00812	4
TCCM_0433.00000020	Threonine aldolase	KO:K01620	4
TCCM_0902.00000260	Uncharacterized conserved protein		4
TCCM_0802.00000050			4
TCCM_0127.00000030	N-acetylmuramoyl-L-alanine amidase	KO:K01448	4
TCCM_0055.00000480	FOG: HEAT repeat		4
TCCM_0017.00000010	Uncharacterized low-complexity proteins		4
TCCM_0065.00000060	riboflavin kinase/FMN adenylyltransferase	KO:K11753	4
TCCM_0589.00000020			3
TCCM_0582.00000060	Type II secretory pathway, component HofQ	KO:K02666	3
TCCM_0069.00005590	Type IIA topoisomerase (DNA gyrase/topo II, topoisomerase IV), A subunit	KO:K02469	3
TCCM_0728.00000010	Chemotaxis protein histidine kinase and related kinases		3
TCCM_0167.00005840	Peroxiredoxin	KO:K03564	3
TCCM_0377.00000010	ABC-type spermidine/putrescine transport systems, ATPase components	KO:K02010	3
TCCM_0615.00000020			3
TCCM_0290.00000010	Polyketide synthase modules and related proteins		3
TCCM_0418.00000040	Dihydroorotate dehydrogenase	KO:K00226	3
TCCM_0646.00000080	Histidinol dehydrogenase	KO:K00013	3
TCCM_0011.00000250			3
TCCM_0002.00000070	Ferredoxin-thioredoxin reductase, catalytic subunit	KO:K00535	3
TCCM_0051.00000350	Aspartate/tyrosine/aromatic aminotransferase	KO:K00812	3
TCCM_0433.00000020	Threonine aldolase	KO:K01620	3
TCCM_0902.00000260	Uncharacterized conserved protein		3
TCCM_0802.00000050			3
TCCM_0127.00000030	N-acetylmuramoyl-L-alanine amidase	KO:K01448	3
TCCM_0055.00000480	FOG: HEAT repeat		3
TCCM_0017.00000010	Uncharacterized low-complexity proteins		3
TCCM_0065.00000060	riboflavin kinase/FMN adenylyltransferase	KO:K11753	3
TCCM_0822.00000010	Phycobilisome protein.	KO:K05377	2
TCCM_0062.00000160	transaldolase	KO:K00616	2
TCCM_0346.00000180	nitrogenase iron protein	KO:K02588	2
TCCM_0445.00000010	glycogen/starch synthases, ADP-glucose type	KO:K00703	2
TCCM_0002.00000040	3-isopropylmalate dehydrogenase	KO:K00052	2
TCCM_0403.00000020	alpha-1,4-glucan:alpha-1,4-glucan 6-glycosyltransferase	KO:K00700	2
TCCM_0093.00000020	Lysyl-tRNA synthetase (class II)	KO:K04567	2
TCCM_0787.00000020	ABC-type nitrate/sulfonate/bicarbonate transport systems, periplasmic components	KO:K02051	2
TCCM_0730.00000040	L-asparaginase II	KO:K01424	2
TCCM_0311.00000320			2
TCCM_0234.00000130	leucyl-tRNA synthetase, eubacterial and mitochondrial family	KO:K01869	2
TCCM_0099.00000030	nitrogenase molybdenum-iron cofactor biosynthesis protein NifE/nitrogenase molybdenum-iron cofactor biosynthesis protein NifN	KO:K02587	2
TCCM_0394.00000130	2-isopropylmalate synthase, bacterial type	KO:K01649	2
TCCM_0148.00000060	global nitrogen regulator NtcA, cyanobacterial		2
TCCM_0638.00000070	Adenylosuccinate lyase	KO:K01756	2
TCCM_0056.00000020	Ferredoxin thioredoxin reductase variable alpha chain.		2
TCCM_0768.00000180	GTP cyclohydrolase I	KO:K01495	2
TCCM_0320.00000010	FOG: HEAT repeat	KO:K01256	2
TCCM_0253.00000500	Translation elongation factors (GTPases)	KO:K02355	2
TCCM_0563.00005530	Photosystem I reaction centre subunit XI.	KO:K02699	2
TCCM_0650.00000010	molybdenum cofactor synthesis domain	KO:K03750	2
TCCM_0269.00000010	NADH dehydrogenase, FAD-containing subunit	KO:K03885	2
TCCM_0141.00000010	Thioesterase domains of type I polyketide synthases or non-ribosomal peptide synthetases		2
TCCM_0933.00000240	D-alanine-D-alanine ligase and related ATP-grasp enzymes	KO:K01921	2
TCCM_0150.00000020	DnaJ-class molecular chaperone with C-terminal Zn finger domain		2
TCCM_0692.00000010	Thiamine pyrophosphate-requiring enzymes [acetolactate synthase, pyruvate dehydrogenase (cytochrome), glyoxylate carboligase, phosphonopyruvate decarboxylase]	KO:K01652	2
TCCM_0889.00000230	Predicted hydrolases or acyltransferases (alpha/beta hydrolase superfamily)	KO:K01259	2
TCCM_0707.00000020	Type IIA topoisomerase (DNA gyrase/topo II, topoisomerase IV), A subunit	KO:K02469	2
TCCM_0441.00000030	ABC-type phosphate/phosphonate transport system, periplasmic component	KO:K02044	2
TCCM_0032.00000050	ABC-type proline/glycine betaine transport system, permease component		2
TCCM_0069.00000470	Predicted dehydrogenase		2
TCCM_0492.00000150	Predicted flavoprotein	KO:K00299	2
TCCM_0697.00000190	Carbon dioxide concentrating mechanism/carboxysome shell protein		2
TCCM_0058.00001190	Dehydrogenases with different specificities (related to short-chain alcohol dehydrogenases)	KO:K13614	2
TCCM_0968.00000100	2-polyprenyl-6-methoxyphenol hydroxylase and related FAD-dependent oxidoreductases		2
TCCM_0232.00000120	cytidylate kinase/pantoate--beta-alanine ligase	KO:K01918	2
TCCM_0341.00000040	orotate phosphoribosyltransferase	KO:K00762	2
TCCM_0054.00000190	Predicted O-linked N-acetylglucosamine transferase, SPINDLY family		2
TCCM_0100.00000260	Taurine catabolism dioxygenase TauD, TfdA family.		2
TCCM_0385.00000030	Methylase involved in ubiquinone/menaquinone biosynthesis		2
TCCM_0121.00000060	folate-binding protein YgfZ	KO:K06980	2
TCCM_0132.00000260	S-formylglutathione hydrolase	KO:K01070	2
TCCM_0800.00000240	Enolase	KO:K01689	2
TCCM_0411.00005920	Fructose-2,6-bisphosphatase	KO:K01834	2
TCCM_0184.00000110	glutamate racemase	KO:K01776	2
TCCM_0083.00000020	Glucokinase	KO:K00845	2
TCCM_0719.00000010	Glycine/D-amino acid oxidases (deaminating)		2
TCCM_0508.00004420			2
TCCM_0630.00000030	1-deoxy-D-xylulose 5-phosphate reductoisomerase	KO:K00099	2
TCCM_0638.00002000			2
TCCM_0578.00000100	Polyketide synthase modules and related proteins	KO:K12436	2
TCCM_0631.00004420	Spermidine synthase	KO:K00797	2
TCCM_0470.00000020	penicillin-binding protein, 1A family		2
TCCM_0143.00000200			2
TCCM_0069.00000180	3-dehydroquinate synthetase	KO:K01735	2
TCCM_0236.00000170			2
TCCM_0237.00000020	translation elongation factor TU	KO:K02358	1
TCCM_0495.00000020	Ribulose 1,5-bisphosphate carboxylase, large subunit	KO:K01601	1
TCCM_0183.00000190	S-adenosylhomocysteine hydrolase	KO:K01251	1
TCCM_0822.00000040	Phycobilisome protein.	KO:K05376	1
TCCM_0857.00000020	fructose-bisphosphate aldolase, class II, Calvin cycle subtype	KO:K01624	1
TCCM_0196.00000230	Transketolase	KO:K00615	1
TCCM_0664.00000010	3-phosphoglycerate kinase	KO:K00927	1
TCCM_0427.00000140	nitrogenase molybdenum-iron protein alpha chain	KO:K02586	1
TCCM_0151.00000020	D-3-phosphoglycerate dehydrogenase	KO:K00058	1
TCCM_0989.00000210	F0F1-type ATP synthase, beta subunit	KO:K02112	1
TCCM_0310.00000010			1
TCCM_0099.00000050	nitrogenase molybdenum-iron protein beta chain	KO:K02591	1
TCCM_0618.00000030	glycogen/starch/alpha-glucan phosphorylases	KO:K00688	1
TCCM_0002.00000010	Transketolase		1
TCCM_0517.00000150	6-phosphogluconate dehydrogenase, decarboxylating	KO:K00033	1
TCCM_0275.00000010	Predicted Zn-dependent peptidases, insulinase-like	KO:K06972	1
TCCM_0404.00000070	glucose-1-phosphate adenylyltransferase	KO:K00975	1
TCCM_0715.00000110	Transketolase	KO:K00615	1
TCCM_0363.00000030	acetate--CoA ligase	KO:K01895	1
TCCM_0391.00000010	Phosphoketolase	KO:K01621	1
TCCM_0791.00000110	S-adenosylhomocysteine hydrolase	KO:K01251	1
TCCM_0654.00000060	Fructose-1,6-bisphosphatase	KO:K03841	1
TCCM_0877.00000030	3-phosphoglycerate kinase	KO:K00927	1
TCCM_0295.00000020	Leucyl aminopeptidase	KO:K01255	1
TCCM_0615.00000030	translation elongation factor Ts/translation elongation factor Ts		1
TCCM_0612.00000020	DNA-directed RNA polymerase, beta subunit	KO:K03043	1
TCCM_0440.00000120	ribulose-phosphate 3-epimerase	KO:K01783	1
TCCM_0070.00000040	isoleucyl-tRNA synthetase	KO:K01870	1
TCCM_0154.00000010	ribosomal protein L1, bacterial/chloroplast	KO:K02863	1
TCCM_0415.00000330	Molecular chaperone, HSP90 family	KO:K04079	1
TCCM_0400.00000310	Choline dehydrogenase and related flavoproteins		1
TCCM_0386.00000440	Molecular chaperone	KO:K04043	1
TCCM_0401.00000010	Highly conserved protein containing a thioredoxin domain	KO:K06888	1
TCCM_0402.00000390	Ketol-acid reductoisomerase	KO:K00053	1
TCCM_0573.00000020	dihydrolipoamide dehydrogenase	KO:K00382	1
TCCM_0856.00000480	photosystem I iron-sulfur protein PsaC	KO:K02691	1
TCCM_0906.00000020	Exoribonuclease R	KO:K12573	1
TCCM_0175.00000010	GDP-mannose 4,6-dehydratase	KO:K01711	1
TCCM_0286.00000040	5-methyltetrahydrofolate--homocysteine methyltransferase	KO:K00548	1
TCCM_0176.00000170	glycine betaine/L-proline transport ATP binding subunit	KO:K02000	1
TCCM_0038.00000020	6-phosphogluconolactonase	KO:K01057	1
TCCM_0180.00000030	delta-1-pyrroline-5-carboxylate dehydrogenase, group 2, putative	KO:K00318	1
TCCM_0064.00000070	glycine dehydrogenase (decarboxylating)	KO:K00281	1
TCCM_0163.00000250	Carbonic anhydrases/acetyltransferases, isoleucine patch superfamily	KO:K08698	1
TCCM_0289.00000050	GTP-binding protein TypA/BipA	KO:K06207	1
TCCM_0024.00000040	Glutamate synthase domain 2	KO:K00284	1
TCCM_0592.00000730			1
TCCM_0631.00000240	adenylosuccinate lyase	KO:K01756	1
TCCM_0507.00000030	diaminopimelate decarboxylase	KO:K01586	1
TCCM_0985.00000020	Dihydroorotase and related cyclic amidohydrolases	KO:K01465	1
TCCM_0244.00000010	Nucleoside-diphosphate-sugar epimerases		1
TCCM_0021.00000170	DNA-directed RNA polymerase, beta'''' subunit	KO:K03046	1
TCCM_0825.00000090	acetylornithine and succinylornithine aminotransferases	KO:K00818	1
TCCM_0686.00000160	phospho-2-dehydro-3-deoxyheptonate aldolase	KO:K03856	1
TCCM_0283.00000020	Zn-dependent oligopeptidases	KO:K01414	1
TCCM_0198.00000050	Photosystem I reaction centre subunit XI.	KO:K02699	1
TCCM_0152.00000230	aspartyl-tRNA synthetase, bacterial type	KO:K01876	1
TCCM_0447.00000020	Choline dehydrogenase and related flavoproteins		1
TCCM_0373.00000020	GMP synthase (glutamine-hydrolyzing), N-terminal domain or A subunit	KO:K01951	1
TCCM_0250.00000200	N-acetyl-gamma-glutamyl-phosphate reductase, common form	KO:K00145	1
TCCM_0320.00000060	Aspartate/tyrosine/aromatic aminotransferase	KO:K00812	1
TCCM_0985.00000010	Dihydroorotase and related cyclic amidohydrolases	KO:K01465	1
TCCM_0320.00000260	tRNA(1-methyladenosine) methyltransferase and related methyltransferases		1
TCCM_0996.00000180			1
TCCM_0292.00000010	Superfamily II DNA and RNA helicases	KO:K05592	1
TCCM_0588.00000020	NAD-dependent aldehyde dehydrogenases	KO:K00128	1
TCCM_0221.00000300	Malic enzyme	KO:K00027	1
TCCM_0598.00000030	Conserved protein/domain typically associated with flavoprotein oxygenases, DIM6/NTAB family		1
TCCM_0349.00000030	Aspartate/tyrosine/aromatic aminotransferase	KO:K00837	1
TCCM_0712.00000280	Diadenosine tetraphosphate (Ap4A) hydrolase and other HIT family hydrolases	KO:K02503	1
TCCM_0692.00000020	acetolactate synthase, large subunit, biosynthetic type	KO:K01652	1
TCCM_0870.00000070	1-hydroxy-2-methyl-2-(E)-butenyl 4-diphosphate synthase	KO:K03526	1
TCCM_0908.00000100	3-isopropylmalate dehydratase large subunit	KO:K01703	1
TCCM_0379.00000070	anti-anti-sigma factor		1
TCCM_0573.00000070	glycyl-tRNA synthetase, tetrameric type, beta subunit	KO:K01879	1
TCCM_0839.00000020	FOG: HEAT repeat	KO:K05386	1
TCCM_0959.00000020	methionine aminopeptidase, type I	KO:K01265	1
TCCM_0148.00000010	Glycine/D-amino acid oxidases (deaminating)		1
TCCM_0469.00000040	Glycine/serine hydroxymethyltransferase	KO:K00600	1
TCCM_0400.00000150	Putative peptidoglycan-binding domain-containing protein		1
TCCM_0450.00000150			1
TCCM_0736.00000010	3-dehydroquinate synthetase	KO:K01735	1
TCCM_0551.00000020	Uncharacterized protein containing a von Willebrand factor type A (vWA) domain	KO:K07114	1
TCCM_0708.00000110	Uncharacterized conserved protein		1
TCCM_0409.00000220	Protoheme ferro-lyase (ferrochelatase)	KO:K01772	1
TCCM_0233.00000030	Response regulators consisting of a CheY-like receiver domain and a winged-helix DNA-binding domain	KO:K10697	1
TCCM_0487.00000020	Tetratricopeptide repeat.		1
TCCM_0887.00000210	ribosomal protein L20	KO:K02887	1
TCCM_0441.00000040	phosphate/phosphite/phosphonate ABC transporters, periplasmic binding protein	KO:K02044	1
TCCM_0182.00000050	Late competence development protein ComFB.		1
TCCM_0705.00000010	ATPases with chaperone activity, ATP-binding subunit	KO:K03695	1
TCCM_0065.00000030	MoxR-like ATPases	KO:K03924	1
TCCM_0314.00000040	Heme/copper-type cytochrome/quinol oxidases, subunit 2	KO:K02275	1
TCCM_0668.00000020	argininosuccinate lyase	KO:K01755	1
TCCM_0078.00000250	Molecular chaperone, HSP90 family	KO:K04079	1
TCCM_0357.00000010	carbamoyl-phosphate synthase, small subunit	KO:K01956	1
TCCM_0964.00000310	Ornithine/acetylornithine aminotransferase	KO:K00818	1
TCCM_0284.00000280	Methionine synthase I, cobalamin-binding domain	KO:K00548	1
TCCM_0980.00000230	Predicted membrane GTPase involved in stress response	KO:K06207	1
TCCM_0185.00000030	5,10-methylene-tetrahydrofolate dehydrogenase/Methenyl tetrahydrofolate cyclohydrolase	KO:K01491	1
TCCM_0372.00004000	Pyruvate/2-oxoglutarate dehydrogenase complex, dihydrolipoamide dehydrogenase (E3) component, and related enzymes	KO:K00383	1
TCCM_0804.00000010	cysteine desulfurase NifS	KO:K04487	1
TCCM_0346.00001180	DnaJ-class molecular chaperone with C-terminal Zn finger domain	KO:K03686	1
TCCM_0563.00000010	FOG: HAMP domain		1
TCCM_0555.00000190	amidohydrolase, AtzE family	KO:K01426	1
TCCM_0496.00000100	DGQHR domain		1
TCCM_0072.00000120	acetyl-CoA carboxylase, carboxyl transferase, alpha subunit	KO:K01962	1
TCCM_0442.00000170	D-alanine-D-alanine ligase and related ATP-grasp enzymes	KO:K01921	1
TCCM_0741.00000830	Dihydroorotase and related cyclic amidohydrolases	KO:K01465	1
TCCM_0102.00000290	pyridoxine 5''-phosphate synthase	KO:K03474	1
TCCM_0730.00000650	Glucan phosphorylase	KO:K00688	1
TCCM_0358.00000030			1
TCCM_0171.00000190	Ni,Fe-hydrogenase I large subunit	KO:K05911	1
TCCM_0185.00000040	Geranylgeranyl pyrophosphate synthase	KO:K00795	1
TCCM_0804.00000020	nitrogenase cofactor biosynthesis protein NifB	KO:K02585	1
TCCM_0613.00000260	ATPases with chaperone activity, ATP-binding subunit	KO:K03696	1
TCCM_0151.00000160	Dinucleotide-utilizing enzymes involved in molybdopterin and thiamine biosynthesis family 2		1
TCCM_0811.00000110	Fructose-2,6-bisphosphatase		1
TCCM_0667.00000010	Uncharacterized conserved protein		1
TCCM_0274.00000040	Alanine-alpha-ketoisovalerate (or valine-pyruvate) aminotransferase	KO:K00835	1
TCCM_0885.00000020	Carbamoylphosphate synthase large subunit (split gene in MJ)	KO:K01955	1
TCCM_0379.00000020	ATPases involved in chromosome partitioning	KO:K03593	1
TCCM_0646.00000070	histidinol dehydrogenase	KO:K00013	1
TCCM_0942.00003930	RTX toxins and related Ca2+-binding proteins		1
TCCM_0062.00000240	Predicted esterase	KO:K06999	1
TCCM_0220.00000010	threonine synthase	KO:K01733	1
TCCM_0314.00000010	Choline dehydrogenase and related flavoproteins		1
TCCM_0908.00000030	Aspartate/tyrosine/aromatic aminotransferase	KO:K00821	1
TCCM_0216.00000030			1
TCCM_0850.00000070	3-isopropylmalate dehydratase, small subunit	KO:K01704	1
TCCM_0233.00005670	Aspartate/tyrosine/aromatic aminotransferase	KO:K00812	1
TCCM_0874.00000010	Predicted sugar kinase	KO:K00858	1
TCCM_0058.00000250	Hemolysin-type calcium-binding repeat (2 copies).		1
TCCM_0110.00000410	Uncharacterized conserved protein		1
TCCM_0515.00000630	Indoleamine 2,3-dioxygenase.		1
TCCM_0858.00000010			1
TCCM_0221.00000550	Predicted amidohydrolase		1
TCCM_0759.00000030	Type II secretory pathway, component HofQ	KO:K02666	1
TCCM_0875.00004240	Malic enzyme	KO:K00027	1
TCCM_0112.00000010	ribosomal protein S12 methylthiotransferase RimO		1
TCCM_0810.00000030			1
TCCM_0250.00000030	Uncharacterized enzyme of phosphonate metabolism	KO:K06164	1
TCCM_0411.00005720	Uncharacterized protein conserved in bacteria		1
TCCM_0467.00005090			1
TCCM_0685.00005480	Rhodanese-related sulfurtransferase		1
TCCM_0914.00000080			1
TCCM_0053.00000330	Uncharacterized protein conserved in bacteria		1
TCCM_0785.00000020	UDP-3-O-[3-hydroxymyristoyl] glucosamine N-acyltransferase	KO:K02536	1
TCCM_0018.00000050	phosphate ABC transporter, phosphate-binding protein		11
TCCM_0728.00000060	ABC-type phosphate transport system, periplasmic component		11
TCCM_0411.00000440	Fructose/tagatose bisphosphate aldolase		11
TCCM_0411.00000440	Fructose/tagatose bisphosphate aldolase		11
TCCM_0411.00000440	Fructose/tagatose bisphosphate aldolase		11
TCCM_0411.00000440	Fructose/tagatose bisphosphate aldolase		11
TCCM_0411.00000440	Fructose/tagatose bisphosphate aldolase		11
TCCM_0411.00000440	Fructose/tagatose bisphosphate aldolase		11
TCCM_0761.00000120	Thiamine pyrophosphate-requiring enzymes [acetolactate synthase, pyruvate dehydrogenase (cytochrome), glyoxylate carboligase, phosphonopyruvate decarboxylase]		11
TCCM_0761.00000120	Thiamine pyrophosphate-requiring enzymes [acetolactate synthase, pyruvate dehydrogenase (cytochrome), glyoxylate carboligase, phosphonopyruvate decarboxylase]		11
TCCM_0940.00000020	Phosphoglucomutase		11
TCCM_0158.00000030	signal recognition particle-docking protein FtsY		11
TCCM_0052.00000190	ribosomal protein S20		11
TCCM_0431.00000230	NADH:ubiquinone oxidoreductase subunit 6 (chain J)		11
TCCM_0122.00000030	cytochrome c oxidase, subunit I		11
