# Supplementary material for: Co-occurrence of Fe and P stress in natural populations of the marine diazotroph Trichodesmium
Source: Copernicus journal article supplement (doi:10.5194/bg-2019-493), 2020-01-16
Supplement: Supplementary file 5 [file TableS6.xlsx]

## Sheet: Diffusion and membrane space
Table S6. Diffusion and membrane space models for cells of different shapes: Iron and phosphate
Diffusion and membrane space models - spherical cell, iron
									Diffusion limitation case				Membrane space limitation case
sphere R (um)	sphere R (cm)	SA:V ratio	SA:V ratio	Cell volume um3	log cell volume	log C per cell pg	c per cell pg	C per cell in umol	nmol Fe per cell	kd (cm3/s)	[M']diffusion (M)	log[M']diffusion M	cell surface area (um2)	max # ligands per cell	max mol ligands per cell	[M']lim space (M)	log [m'] lim
0.1	1e-05	1.47712	30	0.00418667	-2.37813	-2.00723	0.00983491	8.18893e-10	7.14894e-10	7.536e-10	0.00444674	-2.35196	0.1256	3783.13	6.28219e-21	0.177808	-0.750049
0.2	2e-05	1.17609	15	0.0334933	-1.47504	-1.36423	0.0432285	3.59938e-09	3.14226e-09	1.5072e-09	0.00977264	-2.00999	0.5024	15132.5	2.51287e-20	0.195385	-0.709109
0.4	4e-05	0.875061	7.5	0.267947	-0.571952	-0.72123	0.190007	1.58208e-08	1.38115e-08	3.0144e-09	0.0214774	-1.66802	2.0096	60530.1	1.00515e-19	0.214699	-0.668169
0.8	8e-05	0.574031	3.75	2.14357	0.331138	-0.0782295	0.835162	6.95388e-08	6.07074e-08	6.0288e-09	0.0472011	-1.32605	8.0384	242120	4.0206e-19	0.235923	-0.627229
1	0.0001	0.477121	3	4.18667	0.621868	0.12877	1.34515	1.12002e-07	9.77781e-08	7.536e-09	0.0608194	-1.21596	12.56	378313	6.28219e-19	0.243193	-0.614049
2	0.0002	0.176091	1.5	33.4933	1.52496	0.77177	5.91249	4.92297e-07	4.29775e-07	1.5072e-08	0.133663	-0.873988	50.24	1.51325e+06	2.51287e-18	0.267233	-0.573109
4	0.0004	-0.124939	0.75	267.947	2.42805	1.41477	25.9879	2.16385e-06	1.88904e-06	3.0144e-08	0.293753	-0.532018	200.96	6.05301e+06	1.00515e-17	0.293651	-0.532169
6	0.0006	-0.30103	0.5	904.32	2.95632	1.7909	61.7876	5.14468e-06	4.49131e-06	4.5216e-08	0.465609	-0.331978	452.16	1.36193e+07	2.26159e-17	0.310298	-0.508221
8	0.0008	-0.425969	0.375	2143.57	3.33114	2.05777	114.227	9.51103e-06	8.30313e-06	6.0288e-08	0.645583	-0.190048	803.84	2.4212e+07	4.0206e-17	0.322679	-0.491229
10	0.001	-0.522879	0.3	4186.67	3.62187	2.26477	183.98	1.53189e-05	1.33734e-05	7.536e-08	0.831844	-0.0799581	1256	3.78313e+07	6.28219e-17	0.332622	-0.478049
20	0.002	-0.823909	0.15	33493.3	4.52496	2.90777	808.668	6.73329e-05	5.87816e-05	1.5072e-07	1.82815	0.262012	5024	1.51325e+08	2.51287e-16	0.365503	-0.437109
40	0.004	-1.12494	0.075	267947	5.42805	3.55077	3554.43	0.000295956	0.00025837	3.0144e-07	4.01774	0.603982	20096	6.05301e+08	1.00515e-15	0.401634	-0.396169
60	0.006	-1.30103	0.05	904320	5.95632	3.9269	8450.87	0.000703653	0.000614289	4.5216e-07	6.36827	0.804022	45216	1.36193e+09	2.26159e-15	0.424404	-0.372221
80	0.008	-1.42597	0.0375	2.14357e+06	6.33114	4.19377	15623.2	0.00130085	0.00113564	6.0288e-07	8.82983	0.945952	80384	2.4212e+09	4.0206e-15	0.441338	-0.355229
100	0.01	-1.52288	0.03	4.18667e+06	6.62187	4.40077	25163.5	0.00209521	0.00182912	7.536e-07	11.3774	1.05604	125600	3.78313e+09	6.28219e-15	0.454936	-0.342049
200	0.02	-1.82391	0.015	3.34933e+07	7.52496	5.04377	110604	0.00920932	0.00803973	1.5072e-06	25.0041	1.39801	502400	1.51325e+10	2.51287e-14	0.499909	-0.301109
400	0.04	-2.12494	0.0075	2.67947e+08	8.42805	5.68677	486150	0.0404788	0.035338	3.0144e-06	54.9518	1.73998	2009600	6.05301e+10	1.00515e-13	0.549327	-0.260169
600	0.06	-2.30103	0.005	904320000	8.95632	6.0629	1.15585e+06	0.0962406	0.084018	4.5216e-06	87.1007	1.94002	4521600	1.36193e+11	2.26159e-13	0.580469	-0.236221
800	0.08	-2.42597	0.00375	2.14357e+09	9.33114	6.32977	2.13683e+06	0.177921	0.155325	6.0288e-06	120.768	2.08195	8038400	2.4212e+11	4.0206e-13	0.60363	-0.219229
1000	0.1	-2.52288	0.003	4.18667e+09	9.62187	6.53677	3.44168e+06	0.286568	0.250174	7.536e-06	155.612	2.19204	12560000	3.78313e+11	6.28219e-13	0.62223	-0.206049
			calculated per Strathman 1967
			Constants
			D	6e-06	cm2/sec	from Hudson and Morel 1992
			umax	0.3	per day	Berman-Frank et al. 2001
			umax 0.9	3.125e-06	per sec at 0.9umax								5
			Q	0.97	nmol Fe/umol C	Berman-Frank et al. 2001
			Q 0.9	0.873	nmol Fe/umol C
			ligand size	1.66e-05	um2	Hudson and Morel 1992 (for a Ca ATPase)
			Kf	2000000	M-1 s-1	Hudson and Morel 1992 (based on dissociation iron from water)
Diffusion and membrane space models - spherical cell, phosphate
								Diffusion limitation case				Membrane space limitation case
sphere R (um)	sphere R (cm)	SA: V ratio	Cell volume um3	log cell volume	log C per cell pg	c per cell pg	C per cell in umol	nmol P per cell	kd (cm3/s)	[M']diffusion (nM)	log[M']diffusion nM	cell surface area (um2)	max # ligands per cell	max mol ligands per cell	[M']lim space (nM)	log [m'] lim
0.1	1e-05	1.47712	0.00418667	-2.37813	-2.00723	0.00983491	8.18893e-10	1.27059e-08	9.0432e-10	0.0658607	-1.18137	0.1256	3783.13	6.28219e-21	0.105738	-0.975768
0.2	2e-05	1.17609	0.0334933	-1.47504	-1.36423	0.0432285	3.59938e-09	5.58479e-08	1.80864e-09	0.144743	-0.839404	0.5024	15132.5	2.51287e-20	0.116191	-0.934828
0.4	4e-05	0.875061	0.267947	-0.571952	-0.72123	0.190007	1.58208e-08	2.45475e-07	3.61728e-09	0.318102	-0.497434	2.0096	60530.1	1.00515e-19	0.127677	-0.893888
0.8	8e-05	0.574031	2.14357	0.331138	-0.0782295	0.835162	6.95388e-08	1.07896e-06	7.23456e-09	0.699095	-0.155464	8.0384	242120	4.0206e-19	0.140298	-0.852948
1	0.0001	0.477121	4.18667	0.621868	0.12877	1.34515	1.12002e-07	1.73783e-06	9.0432e-09	0.900795	-0.0453738	12.56	378313	6.28219e-19	0.144621	-0.839768
2	0.0002	0.176091	33.4933	1.52496	0.77177	5.91249	4.92297e-07	7.63848e-06	1.80864e-08	1.97969	0.296596	50.24	1.51325e+06	2.51287e-18	0.158918	-0.798828
4	0.0004	-0.124939	267.947	2.42805	1.41477	25.9879	2.16385e-06	3.35743e-05	3.61728e-08	4.35077	0.638566	200.96	6.05301e+06	1.00515e-17	0.174627	-0.757888
6	0.0006	-0.30103	904.32	2.95632	1.7909	61.7876	5.14468e-06	7.98249e-05	5.42592e-08	6.89614	0.838606	452.16	1.36193e+07	2.26159e-17	0.184527	-0.73394
8	0.0008	-0.425969	2143.57	3.33114	2.05777	114.227	9.51103e-06	0.000147573	7.23456e-08	9.56173	0.980536	803.84	2.4212e+07	4.0206e-17	0.19189	-0.716948
10	0.001	-0.522879	4186.67	3.62187	2.26477	183.98	1.53189e-05	0.000237688	9.0432e-08	12.3204	1.09063	1256	3.78313e+07	6.28219e-17	0.197802	-0.703768
20	0.002	-0.823909	33493.3	4.52496	2.90777	808.668	6.73329e-05	0.00104474	1.80864e-07	27.0767	1.4326	5024	1.51325e+08	2.51287e-16	0.217356	-0.662828
40	0.004	-1.12494	267947	5.42805	3.55077	3554.43	0.000295956	0.00459206	3.61728e-07	59.5068	1.77457	20096	6.05301e+08	1.00515e-15	0.238843	-0.621888
60	0.006	-1.30103	904320	5.95632	3.9269	8450.87	0.000703653	0.0109179	5.42592e-07	94.3205	1.97461	45216	1.36193e+09	2.26159e-15	0.252383	-0.59794
80	0.008	-1.42597	2.14357e+06	6.33114	4.19377	15623.2	0.00130085	0.020184	7.23456e-07	130.779	2.11654	80384	2.4212e+09	4.0206e-15	0.262453	-0.580948
100	0.01	-1.52288	4.18667e+06	6.62187	4.40077	25163.5	0.00209521	0.0325093	9.0432e-07	168.51	2.22663	125600	3.78313e+09	6.28219e-15	0.27054	-0.567768
200	0.02	-1.82391	3.34933e+07	7.52496	5.04377	110604	0.00920932	0.142892	1.80864e-06	370.336	2.5686	502400	1.51325e+10	2.51287e-14	0.297284	-0.526828
400	0.04	-2.12494	2.67947e+08	8.42805	5.68677	486150	0.0404788	0.628069	3.61728e-06	813.891	2.91057	2009600	6.05301e+10	1.00515e-13	0.326672	-0.485888
600	0.06	-2.30103	904320000	8.95632	6.0629	1.15585e+06	0.0962406	1.49327	5.42592e-06	1290.05	3.11061	4521600	1.36193e+11	2.26159e-13	0.345192	-0.46194
800	0.08	-2.42597	2.14357e+09	9.33114	6.32977	2.13683e+06	0.177921	2.76062	7.23456e-06	1788.7	3.25254	8038400	2.4212e+11	4.0206e-13	0.358965	-0.444948
1000	0.1	-2.52288	4.18667e+09	9.62187	6.53677	3.44168e+06	0.286568	4.44638	9.0432e-06	2304.76	3.36263	12560000	3.78313e+11	6.28219e-13	0.370026	-0.431768
			calculated per Strathman 1967
		Constants
		D	7.2e-06	cm2/sec	from Hudson and Morel 1992
		umax	0.3	per day	Berman-Frank et al. 2001
		umax 0.9	3.125e-06	per sec at 0.9umax
		Q	17.24	nmolP /umolC	Berman-Frank et al. 2001
		Q 0.9	15.516	nmolP /umolC
		ligand size	1.66e-05	um2	Hudson and Morel 1992 (for a Ca ATPase)
		Kf	5.97743e+07	M-1 s-1	Hudson and Morel 1992 (based on dissociation iron from water)
			Calculation of Kf for phosphate (Froelich et al., 1982)
				phosphate speciation in sw	neg logkf	kf	percent
				MgHPO4	6.1	1.25893e+06	0.4	503570
				HPO4	6	1000000	0.28	280000
				NaHPO4	6.3	1.99526e+06	0.15	299289
				CaHPO4	6.3	1.99526e+06	0.05	99763.1
				CaPO4	8.9	7.94328e+08	0.07	5.5603e+07
							weighted avg kf	5.97743e+07
Diffusion and membrane space models - cylindrical cell, iron
								Diffusion limitation case						Membrane space limitation case
cylinder R (um)	cyinder h (um)	log(SA:V ratio)	cylinder R (cm)	cylinder h (cm)	Cell volume um3	log cell volume	log C per cell pg	c per cell pg	C per cell in umol	nmol Fe per cell	kd (cm3/s)	[M']diffusion (nM)	log[M']diffusion nM	cell surface area (um2)	max # ligands per cell	max mol ligands per cell	[M']lim space (nM)	log [m'] lim
0.1	0.2	1.47712	1e-05	2e-05	0.00628	-2.20204	-1.88185	0.0131264	1.09296e-09	9.54154e-10	3.3912e-09	0.00131888	-2.87979	0.1884	5674.7	9.42328e-21	0.158211	-0.800764
0.2	0.4	1.17609	2e-05	4e-05	0.05024	-1.29895	-1.23885	0.0576962	4.80401e-09	4.1939e-09	6.7824e-09	0.00289852	-2.53782	0.7536	22698.8	3.76931e-20	0.173851	-0.759823
0.4	0.8	0.875061	4e-05	8e-05	0.40192	-0.39586	-0.595853	0.253599	2.11156e-08	1.8434e-08	1.35648e-08	0.0063701	-2.19585	3.0144	90795.2	1.50772e-19	0.191037	-0.718883
0.8	1.6	0.574031	8e-05	0.00016	3.21536	0.50723	0.0471475	1.11467	9.28121e-08	8.10249e-08	2.71296e-08	0.0139996	-1.85388	12.0576	363181	6.0309e-19	0.209921	-0.677943
1	2	0.477121	0.0001	0.0002	6.28	0.79796	0.254147	1.79534	1.49487e-07	1.30502e-07	3.3912e-08	0.0180387	-1.74379	18.84	567470	9.42328e-19	0.21639	-0.664764
2	4	0.176091	0.0002	0.0004	50.24	1.70105	0.897147	7.89128	6.57059e-07	5.73612e-07	6.7824e-08	0.0396439	-1.40182	75.36	2.26988e+06	3.76931e-18	0.237781	-0.623823
4	8	-0.124939	0.0004	0.0008	401.92	2.60414	1.54015	34.6855	2.88805e-06	2.52127e-06	1.35648e-07	0.0871258	-1.05985	301.44	9.07952e+06	1.50772e-17	0.261286	-0.582883
6	12	-0.30103	0.0006	0.0012	1356.48	3.13241	1.91628	82.4666	6.8665e-06	5.99445e-06	2.03472e-07	0.138098	-0.859814	678.24	2.04289e+07	3.39238e-17	0.276099	-0.558935
8	16	-0.425969	0.0008	0.0016	3215.36	3.50723	2.18315	152.457	1.26942e-05	1.1082e-05	2.71296e-07	0.191477	-0.717883	1205.76	3.63181e+07	6.0309e-17	0.287116	-0.541943
10	20	-0.522879	0.001	0.002	6280	3.79796	2.39015	245.554	2.04458e-05	1.78492e-05	3.3912e-07	0.246721	-0.607794	1884	5.6747e+07	9.42328e-17	0.295962	-0.528764
20	40	-0.823909	0.002	0.004	50240	4.70105	3.03315	1079.31	8.98678e-05	7.84546e-05	6.7824e-07	0.542221	-0.265824	7536	2.26988e+08	3.76931e-16	0.325219	-0.487823
40	80	-1.12494	0.004	0.008	401920	5.60414	3.67615	4744.03	0.000395007	0.000344841	1.35648e-06	1.19164	0.0761465	30144	9.07952e+08	1.50772e-15	0.357369	-0.446883
60	120	-1.30103	0.006	0.012	1356480	6.13241	4.05228	11279.2	0.000939151	0.000819879	2.03472e-06	1.8888	0.276186	67824	2.04289e+09	3.39238e-15	0.377629	-0.422935
80	160	-1.42597	0.008	0.016	3215360	6.50723	4.31915	20852	0.00173622	0.00151572	2.71296e-06	2.61889	0.418117	120576	3.63181e+09	6.0309e-15	0.392696	-0.405943
100	200	-1.52288	0.01	0.02	6280000	6.79796	4.52615	33585.1	0.00279643	0.00244129	3.3912e-06	3.37448	0.528206	188400	5.6747e+09	9.42328e-15	0.404796	-0.392764
200	400	-1.82391	0.02	0.04	50240000	7.70105	5.16915	147621	0.0122915	0.0107305	6.7824e-06	7.41611	0.870176	753600	2.26988e+10	3.76931e-14	0.444812	-0.351823
400	800	-2.12494	0.04	0.08	401920000	8.60414	5.81215	648855	0.0540262	0.0471649	1.35648e-05	16.2985	1.21215	3014400	9.07952e+10	1.50772e-13	0.488784	-0.310883
600	1200	-2.30103	0.06	0.12	1356480000	9.13241	6.18828	1.54269e+06	0.12845	0.112137	2.03472e-05	25.8337	1.41219	6782400	2.04289e+11	3.39238e-13	0.516494	-0.286935
800	1600	-2.42597	0.08	0.16	3215360000	9.50723	6.45515	2.85199e+06	0.237468	0.207309	2.71296e-05	35.8193	1.55412	12057600	3.63181e+11	6.0309e-13	0.537102	-0.269943
1000	2000	-2.52288	0.1	0.2	6280000000	9.79796	6.66215	4.59354e+06	0.382476	0.333902	3.3912e-05	46.1537	1.66421	18840000	5.6747e+11	9.42328e-13	0.553651	-0.256764
				Constants
				D	9e-06	cm2/sec								5
				umax	0.3	per day
				umax 0.9	3.125e-06	per sec at 0.9umax
				Q	0.97	nmol Fe/umol C
				Q 0.9	0.873	nmol Fe/umol C
				ligand size	1.66e-05	um2
				Kf	2000000	M-1 s-1
Diffusion and membrane space models - cylindrical cell, phosphate
								Diffusion limitation case						Membrane space limitation case
cylinder R (um)	cyinder h (um)	log(SA:V ratio)	cylinder R (cm)	cylinder h (cm)	Cell volume um3	log cell volume	log C per cell pg	c per cell pg	C per cell in umol	nmol Fe per cell	kd (cm3/s)	[M']diffusion (nM)	log[M']diffusion nM	cell surface area (um2)	max # ligands per cell	max mol ligands per cell	[M']lim space (nM)	log [m'] lim
0.1	0.2	1e-05	2e-05	0.00628	-2.20204	-1.88185	0.0131264	1.09296e-09	1.69584e-08	2.71296e-09	0.029301	-1.53312	0.1884	5674.7	9.42328e-21	0.0940843	-1.02648
0.2	0.4	2e-05	4e-05	0.05024	-1.29895	-1.23885	0.0576962	4.80401e-09	7.45391e-08	5.42592e-09	0.064395	-1.19115	0.7536	22698.8	3.76931e-20	0.103385	-0.985543
0.4	0.8	4e-05	8e-05	0.40192	-0.39586	-0.595853	0.253599	2.11156e-08	3.2763e-07	1.08518e-08	0.141521	-0.849178	3.0144	90795.2	1.50772e-19	0.113605	-0.944602
0.8	1.6	8e-05	0.00016	3.21536	0.50723	0.0471475	1.11467	9.28121e-08	1.44007e-06	2.17037e-08	0.311023	-0.507208	12.0576	363181	6.0309e-19	0.124835	-0.903662
1	2	0.0001	0.0002	6.28	0.79796	0.254147	1.79534	1.49487e-07	2.31944e-06	2.71296e-08	0.400758	-0.397118	18.84	567470	9.42328e-19	0.128682	-0.890483
2	4	0.0002	0.0004	50.24	1.70105	0.897147	7.89128	6.57059e-07	1.01949e-05	5.42592e-08	0.880749	-0.055148	75.36	2.26988e+06	3.76931e-18	0.141403	-0.849543
4	8	0.0004	0.0008	401.92	2.60414	1.54015	34.6855	2.88805e-06	4.4811e-05	1.08518e-07	1.93563	0.286822	301.44	9.07952e+06	1.50772e-17	0.155381	-0.808602
6	12	0.0006	0.0012	1356.48	3.13241	1.91628	82.4666	6.8665e-06	0.000106541	1.62778e-07	3.06805	0.486862	678.24	2.04289e+07	3.39238e-17	0.16419	-0.784654
8	16	0.0008	0.0016	3215.36	3.50723	2.18315	152.457	1.26942e-05	0.000196963	2.17037e-07	4.25395	0.628792	1205.76	3.63181e+07	6.0309e-17	0.170741	-0.767662
10	20	0.001	0.002	6280	3.79796	2.39015	245.554	2.04458e-05	0.000317237	2.71296e-07	5.48128	0.738882	1884	5.6747e+07	9.42328e-17	0.176002	-0.754483
20	40	0.002	0.004	50240	4.70105	3.03315	1079.31	8.98678e-05	0.00139439	5.42592e-07	12.0463	1.08085	7536	2.26988e+08	3.76931e-16	0.1934	-0.713543
40	80	0.004	0.008	401920	5.60414	3.67615	4744.03	0.000395007	0.00612892	1.08518e-06	26.4742	1.42282	30144	9.07952e+08	1.50772e-15	0.212519	-0.672602
60	120	0.006	0.012	1356480	6.13241	4.05228	11279.2	0.000939151	0.0145719	1.62778e-06	41.9625	1.62286	67824	2.04289e+09	3.39238e-15	0.224567	-0.648654
80	160	0.008	0.016	3215360	6.50723	4.31915	20852	0.00173622	0.0269392	2.17037e-06	58.1825	1.76479	120576	3.63181e+09	6.0309e-15	0.233527	-0.631662
100	200	0.01	0.02	6280000	6.79796	4.52615	33585.1	0.00279643	0.0433894	2.71296e-06	74.969	1.87488	188400	5.6747e+09	9.42328e-15	0.240723	-0.618483
200	400	0.02	0.04	50240000	7.70105	5.16915	147621	0.0122915	0.190715	5.42592e-06	164.76	2.21685	753600	2.26988e+10	3.76931e-14	0.264519	-0.577543
400	800	0.04	0.08	401920000	8.60414	5.81215	648855	0.0540262	0.83827	1.08518e-05	362.095	2.55882	3014400	9.07952e+10	1.50772e-13	0.290668	-0.536602
600	1200	0.06	0.12	1356480000	9.13241	6.18828	1.54269e+06	0.12845	1.99304	1.62778e-05	573.934	2.75886	6782400	2.04289e+11	3.39238e-13	0.307147	-0.512654
800	1600	0.08	0.16	3215360000	9.50723	6.45515	2.85199e+06	0.237468	3.68455	2.17037e-05	795.778	2.90079	12057600	3.63181e+11	6.0309e-13	0.319402	-0.495662
1000	2000	0.1	0.2	6280000000	9.79796	6.66215	4.59354e+06	0.382476	5.9345	2.71296e-05	1025.37	3.01088	18840000	5.6747e+11	9.42328e-13	0.329244	-0.482483
			Constants
			D	7.2e-06	cm2/sec									5
			umax	0.3	per day
			umax 0.9	3.125e-06	per sec at 0.9umax
			Q	17.24	nmol Fe/umol C
			Q 0.9	15.516	nmol Fe/umol C
			ligand size	1.66e-05	um2
			Kf	5.97743e+07	M-1 s-1
